# Supplementary material for: Contact-dependent growth inhibition systems in Acinetobacter
Source: PubMed Central journal article supplement (PMC6336857; doi:10.1038/s41598-018-36427-8), 2019-01-17
Supplement: 41598_2018_36427_MOESM1_ESM.pdf [file 41598_2018_36427_MOESM1_ESM.pdf]

# **Contact-dependent growth inhibition systems in *Acinetobacter***

Eliana De Gregorio, Raffaele Zarrilli and Pier Paolo Di Nocera

## Supplementary file 1. CDI-positive Acinetobacter strains

| CDI type | species             | CdiA protein | strain            | GenBank        | ST (sequence type) |
|----------|---------------------|--------------|-------------------|----------------|--------------------|
| type-I   | <i>A. baumannii</i> | bau-A1       | WC-348            | AMZT01000004.1 | 23                 |
| type-I   | <i>A. baumannii</i> | bau-A1       | OIFC0162          | AMFH01000034.1 | 412                |
| type-I   | <i>A. baumannii</i> | bau-A1       | OCU_Ac16a         | BDHK01000001.1 | 412                |
| type-I   | <i>A. baumannii</i> | bau-A1       | ARLG1929          | NGIG01000064.1 | 412                |
| type-I   | <i>A. baumannii</i> | bau-A1       | OIFC047           | AMFW01000012.1 | 665                |
| type-I   | <i>A. baumannii</i> | bau-A2       | 2004ZJAB5         | JSCW01000063.1 | 23                 |
| type-I   | <i>A. baumannii</i> | bau-A2       | 2004ZJAB6         | JSCX01000078.1 | 23                 |
| type-I   | <i>A. baumannii</i> | bau-A2       | XH769             | LYGN01000059.1 | 23                 |
| type-I   | <i>A. baumannii</i> | bau-A2       | XH683             | LYJG01000011.1 | 23                 |
| type-I   | <i>A. baumannii</i> | bau-A2       | 65                | MACA01000015.1 | 23                 |
| type-I   | <i>A. baumannii</i> | bau-A2       | BJAB0715          | NC_021733.1    | 23                 |
| type-I   | <i>A. baumannii</i> | bau-A2       | XH858             | NZ_CP014528.1  | 23                 |
| type-I   | <i>A. baumannii</i> | bau-A2       | GB1-2             | NIW001000006.1 | 23                 |
| type-I   | <i>A. baumannii</i> | bau-A2       | 2011BJAB9         | JSDA01000044.1 | 218                |
| type-I   | <i>A. baumannii</i> | bau-A2       | ABBL102           | LLHC01000068.1 | ND                 |
| type-I   | <i>A. baumannii</i> | bau-B1       | 4190              | AEPA01000201   | 25                 |
| type-I   | <i>A. baumannii</i> | bau-B1       | Naval-18          | AFDA02000005   | 25                 |
| type-I   | <i>A. baumannii</i> | bau-B1       | OIFC143           | AFDL01000002   | 25                 |
| type-I   | <i>A. baumannii</i> | bau-B1       | AB5256            | AHAI01000037   | 25                 |
| type-I   | <i>A. baumannii</i> | bau-B1       | NIPH146           | APOU01000014   | 25                 |
| type-I   | <i>A. baumannii</i> | bau-B1       | CI86              | AVOB01000053   | 25                 |
| type-I   | <i>A. baumannii</i> | bau-B1       | CI79              | AVOD01000028   | 25                 |
| type-I   | <i>A. baumannii</i> | bau-B1       | 107m              | CBSG010000018  | 25                 |
| type-I   | <i>A. baumannii</i> | bau-B1       | 984213            | JEVX01000144   | 25                 |
| type-I   | <i>A. baumannii</i> | bau-B1       | 1429530           | JEWM01000012   | 25                 |
| type-I   | <i>A. baumannii</i> | bau-B1       | RUH1486           | JZBU01000028   | 25                 |
| type-I   | <i>A. baumannii</i> | bau-B1       | NM3               | JZBV01000025   | 25                 |
| type-I   | <i>A. baumannii</i> | bau-B1       | LUH_6220          | JZBW01000015   | 25                 |
| type-I   | <i>A. baumannii</i> | bau-B1       | 4390              | JZBY01000030   | 25                 |
| type-I   | <i>A. baumannii</i> | bau-B1       | 741019            | JZBZ01000028   | 25                 |
| type-I   | <i>A. baumannii</i> | bau-B1       | 161/07            | JZCA01000036   | 25                 |
| type-I   | <i>A. baumannii</i> | bau-B1       | ABBL018           | LLCY01000195   | 25                 |
| type-I   | <i>A. baumannii</i> | bau-B1       | AB2828 LV35       | LRDT01000007   | 25                 |
| type-I   | <i>A. baumannii</i> | bau-B1       | AB3638 LV38       | LRDW01000020   | 25                 |
| type-I   | <i>A. baumannii</i> | bau-B1       | AB3806 LV40       | LRDY01000020   | 25                 |
| type-I   | <i>A. baumannii</i> | bau-B1       | PR388             | NGEV01000032   | 25                 |
| type-I   | <i>A. baumannii</i> | bau-B1       | ARLG1317          | NGH001000084   | 25                 |
| type-I   | <i>A. baumannii</i> | bau-B1       | HWBA8             | NZ_CP020597    | 25                 |
| type-I   | <i>A. baumannii</i> | bau-B1       | BAuABod-3         | NIWN01000020   | 25                 |
| type-I   | <i>A. baumannii</i> | bau-B1       | NIPH 201          | APQV01000009   | 38                 |
| type-I   | <i>A. baumannii</i> | bau-B1       | P630              | CBYG01000017   | 126                |
| type-I   | <i>A. baumannii</i> | bau-B1       | 233846            | JMOG01000012   | 126                |
| type-I   | <i>A. baumannii</i> | bau-B1       | PR337             | NGEA01000060   | 126                |
| type-I   | <i>A. baumannii</i> | bau-B1       | CIP70.10          | NZ_LN865143.1  | 126                |
| type-I   | <i>A. baumannii</i> | bau-B1       | R2091             | NZ_LN997846.1  | 126                |
| type-I   | <i>A. baumannii</i> | bau-B1       | DSM 30011         | JJOC01000004   | 738                |
| type-I   | <i>A. baumannii</i> | bau-B1       | 554S              | NKXP01000136.1 | 307                |
| type-I   | <i>A. baumannii</i> | bau-B1       | LUH_7841          | JZBX01000012   | 402                |
| type-I   | <i>A. baumannii</i> | bau-B1       | ABBL007 contig-15 | LLCN01000226.1 | 497                |
| type-I   | <i>A. baumannii</i> | bau-B1       | ARLG1873          | NGJA01000152   | 505                |
| type-I   | <i>A. baumannii</i> | bau-B2       | XH730             | LYHV01000053   | 46                 |
| type-I   | <i>A. baumannii</i> | bau-B2       | XH674             | LYJP01000004   | 46                 |
| type-I   | <i>A. baumannii</i> | bau-B2       | XH673             | LYJQ01000014   | 46                 |
| type-I   | <i>A. baumannii</i> | bau-B2       | XH668             | LYJV01000011   | 46                 |
| type-I   | <i>A. baumannii</i> | bau-B2       | XH664             | LYJZ01000023   | 46                 |
| type-I   | <i>A. baumannii</i> | bau-B2       | XH662             | LYKB01000643   | 46                 |
| type-I   | <i>A. baumannii</i> | bau-B2       | XH661             | LYKC01000016   | 46                 |
| type-I   | <i>A. baumannii</i> | bau-B2       | XH648             | LYKH01000023   | 46                 |
| type-I   | <i>A. baumannii</i> | bau-B2       | XH647             | LYKI01000034   | 46                 |
| type-I   | <i>A. baumannii</i> | bau-B2       | XH642             | LYKN01000014   | 46                 |
| type-I   | <i>A. baumannii</i> | bau-B2       | XH641             | LYK001000034   | 46                 |
| type-I   | <i>A. baumannii</i> | bau-B2       | XH553             | LYKU01000022   | 46                 |
| type-I   | <i>A. baumannii</i> | bau-B2       | XH545             | LYLC01000121   | 46                 |
| type-I   | <i>A. baumannii</i> | bau-B2       | XH512             | LYLG01000108   | 46                 |

|        |                     |        |                        |                |     |
|--------|---------------------|--------|------------------------|----------------|-----|
| type-I | <i>A. baumannii</i> | bau-B2 | ATCC19606              | ACQB0100024.1  | 52  |
| type-I | <i>A. baumannii</i> | bau-B2 | ATCC19606, JCM841 str. | APRG0100014.1  | 52  |
| type-I | <i>A. baumannii</i> | bau-B2 | ATCC19606              | JMRY0100015    | 52  |
| type-I | <i>A. baumannii</i> | bau-B2 | MSP4-16                | AODW0100028.1  | 52  |
| type-I | <i>A. baumannii</i> | bau-B2 | GTC03324               | BBNH0100005.1  | 52  |
| type-I | <i>A. baumannii</i> | bau-B2 | GTC03329               | BBNJ0100004.1  | 52  |
| type-I | <i>A. baumannii</i> | bau-B2 | NBRC110493             | BBQ0100003.1   | 52  |
| type-I | <i>A. baumannii</i> | bau-B2 | NBRC110495             | BBOR0100009.1  | 52  |
| type-I | <i>A. baumannii</i> | bau-B2 | GTC03325               | BBSP0100005.1  | 52  |
| type-I | <i>A. baumannii</i> | bau-B2 | NBRC110494             | BBTE0100006.1  | 52  |
| type-I | <i>A. baumannii</i> | bau-B2 | NBRC109757             | BBTN0100005.1  | 52  |
| type-I | <i>A. baumannii</i> | bau-B2 | ab736                  | NZ_CP015121.1  | 52  |
| type-I | <i>A. baumannii</i> | bau-B2 | 1062314                | JFDR0100005    | 54  |
| type-I | <i>A. baumannii</i> | bau-B2 | 3909                   | AEOZ01000177   | 78  |
| type-I | <i>A. baumannii</i> | bau-B2 | TG22142                | ASFL0100019    | 78  |
| type-I | <i>A. baumannii</i> | bau-B2 | TG22146                | ASFM0100029    | 78  |
| type-I | <i>A. baumannii</i> | bau-B2 | TG22150                | ASF00100048    | 78  |
| type-I | <i>A. baumannii</i> | bau-B2 | UH5207                 | AYFP0100011.1  | 78  |
| type-I | <i>A. baumannii</i> | bau-B2 | 68SM01                 | FUEK0100017    | 78  |
| type-I | <i>A. baumannii</i> | bau-B2 | 61SM01                 | FUEL0100016    | 78  |
| type-I | <i>A. baumannii</i> | bau-B2 | 103SM                  | FUEM0100017    | 78  |
| type-I | <i>A. baumannii</i> | bau-B2 | 14336                  | FUEN0100043    | 78  |
| type-I | <i>A. baumannii</i> | bau-B2 | MGTN                   | FUEO0100015    | 78  |
| type-I | <i>A. baumannii</i> | bau-B2 | 96SM                   | FUEP0100020    | 78  |
| type-I | <i>A. baumannii</i> | bau-B2 | 20C15                  | FUEQ0100051    | 78  |
| type-I | <i>A. baumannii</i> | bau-B2 | 25C30                  | FUER0100050    | 78  |
| type-I | <i>A. baumannii</i> | bau-B2 | 74SM01                 | FUES0100018    | 78  |
| type-I | <i>A. baumannii</i> | bau-B2 | MONUR                  | FUET0100019    | 78  |
| type-I | <i>A. baumannii</i> | bau-B2 | 2RED09                 | FUEU0100017    | 78  |
| type-I | <i>A. baumannii</i> | bau-B2 | 65SM01                 | FUEV0100047    | 78  |
| type-I | <i>A. baumannii</i> | bau-B2 | 2MG                    | FUEX0100028    | 78  |
| type-I | <i>A. baumannii</i> | bau-B2 | 5M0                    | FUEY0100055    | 78  |
| type-I | <i>A. baumannii</i> | bau-B2 | 1096934                | JEXM0100065    | 78  |
| type-I | <i>A. baumannii</i> | bau-B2 | 831240                 | JEY00100017    | 78  |
| type-I | <i>A. baumannii</i> | bau-B2 | 855125                 | JMNT0100054    | 78  |
| type-I | <i>A. baumannii</i> | bau-B2 | UH17_52                | JWYK0300038.1  | 78  |
| type-I | <i>A. baumannii</i> | bau-B2 | ABBL025                | LLDF0100012    | 78  |
| type-I | <i>A. baumannii</i> | bau-B2 | ABBL026                | LLDG01000302   | 78  |
| type-I | <i>A. baumannii</i> | bau-B2 | ABUH393                | MSMS0100003    | 78  |
| type-I | <i>A. baumannii</i> | bau-B2 | PR308                  | NGBY0100015    | 78  |
| type-I | <i>A. baumannii</i> | bau-B2 | PR355                  | NGCI0100007    | 78  |
| type-I | <i>A. baumannii</i> | bau-B2 | PR371                  | NGCY0100042    | 78  |
| type-I | <i>A. baumannii</i> | bau-B2 | PR385                  | NGES0100073    | 78  |
| type-I | <i>A. baumannii</i> | bau-B2 | PR391                  | NGEY0100012.1  | 78  |
| type-I | <i>A. baumannii</i> | bau-B2 | 72SM01                 | FUEW0100053    | 78  |
| type-I | <i>A. baumannii</i> | bau-B2 | B11911                 | CP021345.2     | 149 |
| type-I | <i>A. baumannii</i> | bau-B2 | 1295549                | JFXB0100002    | 652 |
| type-I | <i>A. baumannii</i> | bau-B2 | 277047                 | JFXS0100010    | 652 |
| type-I | <i>A. baumannii</i> | bau-B2 | 426863                 | JFYF0100002    | 652 |
| type-I | <i>A. baumannii</i> | bau-B2 | UH6507                 | AYFK0100017    | 669 |
| type-I | <i>A. baumannii</i> | bau-B2 | 86II/2C                | NIWI0100026    | 690 |
| type-I | <i>A. baumannii</i> | bau-B2 | Pr310                  | NGCA0100028    | 810 |
| type-I | <i>A. baumannii</i> | bau-B2 | RB-1399                | MPPK0100005.1  | 920 |
| type-I | <i>A. baumannii</i> | bau-B2 | TG19617                | AMID0100010.1  | 438 |
| type-I | <i>A. baumannii</i> | bau-B2 | IOMTU433               | NZ_AP014649.1  | 622 |
| type-I | <i>A. baumannii</i> | bau-B2 | AB360                  | NGKM0100010    | 622 |
| type-I | <i>A. baumannii</i> | bau-B2 | XH729                  | LYHW0100020    | nd  |
| type-I | <i>A. baumannii</i> | bau-B2 | XH703                  | LYIS0100052    | nd  |
| type-I | <i>A. baumannii</i> | bau-B3 | 1267820                | JEWD0100091.1  | 103 |
| type-I | <i>A. baumannii</i> | bau-B3 | ABBL038                | LLDS0100070.1  | nd  |
| type-I | <i>A. baumannii</i> | bau-B3 | ABBL085                | LLGN01000115.1 | 103 |
| type-I | <i>A. baumannii</i> | bau-B3 | AB031                  | NZ_CP009256.1  | 638 |
| type-I | <i>A. baumannii</i> | bau-B3 | NIPH 67                | APRA0100005.1  | 35  |
| type-I | <i>A. baumannii</i> | bau-B3 | AB_2007-16-25-01-7     | AMHI0100023.1  | 241 |
| type-I | <i>A. baumannii</i> | bau-B3 | AB_2007-16-27-01       | AMHJ0100020.1  | 241 |
| type-I | <i>A. baumannii</i> | bau-B3 | AB_TG27339             | AMIR0100011.1  | 241 |
| type-I | <i>A. baumannii</i> | bau-B3 | 118362                 | JEWB0100054.1  | 241 |
| type-I | <i>A. baumannii</i> | bau-B4 | NIPH 601               | APQZ0100007.1  | 40  |
| type-I | <i>A. baumannii</i> | bau-B4 | GTC 03322              | BBNF1000060.1  | 40  |

|        |              |        |                        |                 |         |
|--------|--------------|--------|------------------------|-----------------|---------|
| type-I | A. baumannii | bau-B4 | GTC 03323              | BBNG01000061.1  | 40      |
| type-I | A. baumannii | bau-B4 | GTC 03328              | BBNI01000064.1  | 40      |
| type-I | A. baumannii | bau-B4 | NBRC 110489            | BBOP01000068.1  | 40      |
| type-I | A. baumannii | bau-B4 | NBRC 110491            | BBTC01000062.1  | 40      |
| type-I | A. baumannii | bau-B4 | TYTH-7                 | AGSV01000139.1  | 40      |
| type-I | A. baumannii | bau-B4 | LY1                    | JDSV01000226.1  | 40      |
| type-I | A. baumannii | bau-B4 | LY2                    | JDSW01000052.1  | 40      |
| type-I | A. baumannii | bau-B4 | 3.5D                   | MABZ01000006.1  | 388     |
| type-I | A. baumannii | bau-B4 | ABUH513                | MSPL01000024.1  | 941     |
| type-I | A. baumannii | bau-B4 | ARLG1862               | NGGF01000027.1  | 941     |
| type-I | A. baumannii | bau-B4 | 219_ABAU               | JVPN01000108.1  | 1140    |
| type-I | A. baumannii | bau-B4 | ABBL110                | LLHI01000055.1  | nd      |
| type-I | A. baumannii | bau-B4 | ATCC 17945             | MTGG01000053.1  | 1168    |
| type-I | A. baumannii | bau-B4 | PR360                  | NGCN01000030    | 494     |
| type-I | A. baumannii | bau-B4 | NCTC7364               | NZ_LT605059.1   | 494     |
| type-I | A. baumannii | bau-C1 | MSP4-16                | AODW01000010.1  | 52      |
| type-I | A. baumannii | bau-C1 | ATCC19606, JCM841 str. | APRG01000013.1  | 52      |
| type-I | A. baumannii | bau-C1 | GTC03324               | BBNH01000013.1  | 52      |
| type-I | A. baumannii | bau-C1 | GTC03329               | BBNJ01000012.1  | 52      |
| type-I | A. baumannii | bau-C1 | NBRC110493             | BBOQ01000026.1  | 52      |
| type-I | A. baumannii | bau-C1 | NBRC110495             | BBOR01000002.1  | 52      |
| type-I | A. baumannii | bau-C1 | GTC03325               | BBSF01000021.1  | 52      |
| type-I | A. baumannii | bau-C1 | NBRC110494             | BBTE01000023.1  | 52      |
| type-I | A. baumannii | bau-C1 | NBRC109757             | BBTN01000002.1  | 52      |
| type-I | A. baumannii | bau-C1 | ATCC 19606             | JMRY01000018.1  | 52      |
| type-I | A. baumannii | bau-C1 | ab736                  | NZ_CP015121.1   | 52      |
| type-I | A. baumannii | bau-C1 | 1417041                | JEYP01000023.1  | 108     |
| type-I | A. baumannii | bau-C1 | TG19617                | AMID01000004.1  | 438     |
| type-I | A. baumannii | bau-C2 | ACICU                  | CP000863        | 2       |
| type-I | A. baumannii | bau-C3 | 625974                 | JEXD01000018.1  | 509     |
| type-I | A. baumannii | bau-C3 | B8342                  | NZ_CP021342     | dsv 509 |
| type-I | A. baumannii | bau-C3 | ZW85-1                 | NC_023028.1     | 639     |
| type-I | A. baumannii | bau-C3 | ARLG1846               | NGFV01000032    | 509     |
| type-I | A. baumannii | bau-C4 | UH19608                | AYFZ01000050.1  | 79      |
| type-I | A. baumannii | bau-C4 | ABBL006                | LLCM01000033.1  | 79      |
| type-I | A. baumannii | bau-C4 | ABBL017                | LLCX01000003.1  | 79      |
| type-I | A. baumannii | bau-C4 | ABBL023                | LLDD01000014.1  | 79      |
| type-I | A. baumannii | bau-C4 | ABBL039                | LLDT01000099.1  | 79      |
| type-I | A. baumannii | bau-C4 | ABBL043                | LLDX01000088.1  | 79      |
| type-I | A. baumannii | bau-C4 | ABBL049                | LLED01000076.1  | 79      |
| type-I | A. baumannii | bau-C4 | ABBL052                | LLEG01000087.1  | 79      |
| type-I | A. baumannii | bau-C4 | ABBL055                | LLFA01000014.1  | 79      |
| type-I | A. baumannii | bau-C4 | ABBL056                | LLFB01000081.1  | 79      |
| type-I | A. baumannii | bau-C4 | ABBL067a               | LLFN01000302.1  | 79      |
| type-I | A. baumannii | bau-C4 | ABBL067b               | LLF001000337.1  | 79      |
| type-I | A. baumannii | bau-C4 | ABBL067j               | LLFV01000119.1  | 79      |
| type-I | A. baumannii | bau-C4 | ABBL067k               | LLFW01000018.1  | 79      |
| type-I | A. baumannii | bau-C4 | ABBL067l               | LLFX01000008.1  | 79      |
| type-I | A. baumannii | bau-C4 | ABBL068                | LLFY01000131.1  | 79      |
| type-I | A. baumannii | bau-C4 | ABBL069                | LLFZ01000242.1  | 79      |
| type-I | A. baumannii | bau-C4 | ABBL101                | LLHB01000161.1  | 79      |
| type-I | A. baumannii | bau-C4 | ABOB01                 | LLIQ01000015.1  | 79      |
| type-I | A. baumannii | bau-C4 | ABOB03                 | LLIS01000357.1  | 79      |
| type-I | A. baumannii | bau-C4 | ABOB04                 | LLIT01000019.1  | 79      |
| type-I | A. baumannii | bau-C4 | ABOB04_a               | LLIU01000391.1  | 79      |
| type-I | A. baumannii | bau-C4 | ABOB06                 | LLIW01000172.1  | 79      |
| type-I | A. baumannii | bau-C4 | ABOB08                 | LLIZ01000033.1  | 79      |
| type-I | A. baumannii | bau-C4 | ABOB12                 | LLJD010000318.1 | 79      |
| type-I | A. baumannii | bau-C4 | ABOBEN                 | LLJG01000005.1  | 79      |
| type-I | A. baumannii | bau-C4 | Ab28                   | LMBQ01000020.1  | 79      |
| type-I | A. baumannii | bau-C4 | CU032113               | LXYW01000100.1  | 79      |
| type-I | A. baumannii | bau-C4 | ABUH564                | MSOI01000074.1  | 79      |
| type-I | A. baumannii | bau-C4 | 499                    | MWPK01000224.1  | 79      |
| type-I | A. baumannii | bau-C4 | 923                    | MWP001000235.1  | 79      |
| type-I | A. baumannii | bau-C4 | ABUH505                | NCXV01000134.1  | 79      |
| type-I | A. baumannii | bau-C4 | ABUH428                | NCYV01000120.1  | 79      |
| type-I | A. baumannii | bau-C4 | ARLG-1775              | NEQF01000053.1  | 79      |
| type-I | A. baumannii | bau-C4 | ARLG-1860              | NEQK01000094.1  | 79      |
| type-I | A. baumannii | bau-C4 | AF-401                 | NZ_CP018254.1   | 79      |

|        |                     |               |                        |                |      |
|--------|---------------------|---------------|------------------------|----------------|------|
| type-I | <i>A. baumannii</i> | bau-C4        | ABBL030                | LLDK01000140.1 | 79   |
| type-I | <i>A. baumannii</i> | bau-C4        | PR307                  | NGBX01000017.1 | 79   |
| type-I | <i>A. baumannii</i> | bau-C4        | PR315                  | NGEM01000008.1 | 150  |
| type-I | <i>A. baumannii</i> | bau-C4        | ARLG1800               | NGGR01000007.1 | 150  |
| type-I | <i>A. baumannii</i> | bau-C4        | ARLG1936               | NGIK01000038.1 | 150  |
| type-I | <i>A. baumannii</i> | bau-C4        | TG02011                | ASES01000060.1 | 422  |
| type-I | <i>A. baumannii</i> | bau-C4        | UH7607                 | AYFH01000090.1 | 422  |
| type-I | <i>A. baumannii</i> | bau-C4        | UH6907                 | AYFJ01000036.1 | 422  |
| type-I | <i>A. baumannii</i> | bau-C4        | UH22908                | AYFV01000057.1 | 422  |
| type-I | <i>A. baumannii</i> | bau-C4        | UH16208                | AYGB01000015.1 | 422  |
| type-I | <i>A. baumannii</i> | bau-C4        | UH12208                | AYGK01000135.1 | 422  |
| type-I | <i>A. baumannii</i> | bau-C4        | CCBH15815Y_43          | NLC001000043.1 | 730  |
| type-I | <i>A. baumannii</i> | bau-C5        | 86II/2C                | NIWI01000005.1 | 690  |
| type-I | <i>A. baumannii</i> | bau-C5        | 01D3-2                 | NIWQ01000007.1 | 240  |
| type-I | <i>A. baumannii</i> | bau-C5        | PLG9P835               | NIWR01000008.1 | 1179 |
| type-I | <i>A. pittii</i>    | pit-A3        | IEC338SC               | NZ_CP015145.1  | 1076 |
| type-I | <i>A. pittii</i>    | pit-A4        | PR320                  | NGDK01000053.1 | 119  |
| type-I | <i>A. pittii</i>    | pit-A4        | NBRC 110504            | BBTQ01000063.1 | 119  |
| type-I | <i>A. pittii</i>    | pit-A4        | NBRC 110507            | BBTZ01000081.1 | 119  |
| type-I | <i>A. pittii</i>    | pit-A4        | NBRC 110509            | BBUA01000067.1 | 119  |
| type-I | <i>A. pittii</i>    | pit-A4        | ABBL111                | LLHJ01002199.1 | 119  |
| type-I | <i>A. pittii</i>    | pit-A4/C7/A4  | St-12537-91            | MDIL01000050.1 | 70   |
| type-I | <i>A. pittii</i>    | pit-A5        | Ac. sp. 1294243        | JFXG01000010.1 | 214  |
| type-I | <i>A. pittii</i>    | pit-A5        | Ac. sp. 1264765        | JMNG01000024.1 | 220  |
| type-I | <i>A. pittii</i>    | pit-A5        | St-19650-90            | MDHQ01000034.1 | 747  |
| type-I | <i>A. pittii</i>    | pit-A5        | ABUH540                | MSOC01000021.1 | 1175 |
| type-I | <i>A. pittii</i>    | pit-A5        | ARLG1807               | NGGW01000019.1 | 1176 |
| type-I | <i>A. pittii</i>    | pit-A5        | ARLG1875               | NGJC01000033.1 | nd   |
| type-I | <i>A. pittii</i>    | pit-A5        | TCM292                 | LSAK01000014.1 | 207  |
| type-I | <i>A. pittii</i>    | pit-A5/A4/A5  | A. sp. 907131 (*)      | JEXS01000005.1 | 220  |
| type-I | <i>A. pittii</i>    | pit-A5/A4/A5  | FC8876                 | LBCP01000024.1 | 643  |
| type-I | <i>A. pittii</i>    | pit-A5/A4/A5  | ABBL033                | LLDN01000009.1 | 1170 |
| type-I | <i>A. pittii</i>    | pit-A5/A4/A5  | ABBL098                | LLGZ01000237.1 | 1177 |
| type-I | <i>A. pittii</i>    | pit-A5/C7/A5  | PR301                  | NGBT01000013.1 | 457  |
| type-I | <i>A. pittii</i>    | pit-A5/Hn1/A5 | UKK-0546               | MDIJ01000089.1 | 776  |
| type-I | <i>A. pittii</i>    | pit-A5/Hn2/A5 | DSM 21653              | AIEK01000183.1 | 63   |
| type-I | <i>A. pittii</i>    | pit-A5/Hn2/A5 | DSM 25618              | BBST01000016.1 | 63   |
| type-I | <i>A. pittii</i>    | pit-A5/Hn2/A5 | ATCC 19004             | APQP01000005.1 | 63   |
| type-I | <i>A. pittii</i>    | pit-A5/Hn2/A5 | DSM 9306               | AIEF01000274.1 | 64   |
| type-I | <i>A. pittii</i>    | pit-A5/Hn2/A5 | St-10592-91            | MDH001000041.1 | 64   |
| type-I | <i>A. pittii</i>    | pit-A5/Hn2/A5 | St-20772-90            | MDHR01000015.1 | 64   |
| type-I | <i>A. pittii</i>    | pit-A5/Hn2/A5 | St-14379-92            | MDIW01000070.1 | 64   |
| type-I | <i>A. pittii</i>    | pit-A5/Hn2/A5 | PR386                  | NGET01000034.1 | 248  |
| type-I | <i>A. pittii</i>    | pit-A5/Hn2/A5 | UKK-0548               | MDIM01000262.1 | 248  |
| type-I | <i>A. pittii</i>    | pit-A5/Hn2/A5 | UKK-0556               | MDIU01000045.1 | 248  |
| type-I | <i>A. pittii</i>    | pit-A5/Hn2/A5 | ARLG1839               | NGHJ01000050.1 | 396  |
| type-I | <i>A. pittii</i>    | pit-A5/Hn2/A5 | PR368                  | NGCV01000008.1 | 744  |
| type-I | <i>A. pittii</i>    | pit-A5/Hn2/A5 | St-12828-92            | MDIV01000078.1 | 744  |
| type-I | <i>A. pittii</i>    | pit-A5/Hn2/A5 | NBRC 110508            | BBTR01000017.1 | 1178 |
| type-I | <i>Acb complex</i>  | pit-A5/Hn2/A5 | NIPH 817               | APPF01000024.1 | 88   |
| type-I | <i>A. pittii</i>    | pit-A5/C8/A5  | ARLG1933               | NGII01000017.1 | 1165 |
| type-I | <i>A. pittii</i>    | pit-B5        | D499                   | AGFH01000024.1 | 63   |
| type-I | <i>A. pittii</i>    | pit-B5        | ATCC 19004 = CIP 70.29 | APQP01000005.1 | 63   |
| type-I | <i>A. pittii</i>    | pit-B5        | DSM 25618              | BBST01000007.1 | 63   |
| type-I | <i>A. pittii</i>    | pit-B5        | UKK-0539               | MDIC01000039.1 | 63   |
| type-I | <i>A. pittii</i>    | pit-B5        | UKK-0541               | MDIE01000040.1 | 63   |
| type-I | <i>A. pittii</i>    | pit-B5        | UKK-0542               | MDIF01000057.1 | 63   |
| type-I | <i>A. pittii</i>    | pit-B5        | UKK-0543               | MDIG01000029.1 | 63   |
| type-I | <i>A. pittii</i>    | pit-B5        | UKK-0547               | MDIK01001418.1 | 63   |
| type-I | <i>A. pittii</i>    | pit-B5        | UKK-0551               | MDIP01000101.1 | 63   |
| type-I | <i>A. pittii</i>    | pit-B5        | St-10592-91            | MDH001000002.1 | 64   |
| type-I | <i>A. pittii</i>    | pit-B5        | St-20772-90            | MDHR01000085.1 | 64   |
| type-I | <i>A. pittii</i>    | pit-B5        | UKK-0327               | MDHW01000161.1 | 64   |
| type-I | <i>A. pittii</i>    | pit-B5        | St-14379-92            | MDIW01000004.1 | 64   |
| type-I | <i>A. pittii</i>    | pit-B5        | PR313                  | NGCD01000013.1 | 64   |
| type-I | <i>A. pittii</i>    | pit-B5        | PR370                  | NGCX01000007.1 | 64   |
| type-I | <i>A. pittii</i>    | pit-B5        | ARLG1803               | NGGT01000052.1 | 64   |
| type-I | <i>A. pittii</i>    | pit-B5        | St-12537-91            | MDIL01000050.1 | 70   |
| type-I | <i>A. pittii</i>    | pit-B5        | Ac sp. SH024           | ADCH01000014.1 | 93   |

|        |                     |               |                |                |      |
|--------|---------------------|---------------|----------------|----------------|------|
| type-I | <i>A. pittii</i>    | pit-B5        | ABBL010        | LLCQ01000051.1 | 93   |
| type-I | <i>A. pittii</i>    | pit-B5        | ABBL047        | LLEB01000028.1 | 93   |
| type-I | <i>A. pittii</i>    | pit-B5        | ABBL065        | LLFK01000010.1 | 93   |
| type-I | <i>A. pittii</i>    | pit-B5        | ABBL103        | LLHD01000155.1 | 93   |
| type-I | <i>A. pittii</i>    | pit-B5        | St-11469-92    | MDHP01000045.1 | 93   |
| type-I | <i>A. pittii</i>    | pit-B5        | UKK-0245       | MDHT01000134.1 | 93   |
| type-I | <i>A. pittii</i>    | pit-B5        | UKK-0544       | MDIH01000054.1 | 93   |
| type-I | <i>A. pittii</i>    | pit-B5        | UKK-0555       | MDIT01000139.1 | 93   |
| type-I | <i>A. pittii</i>    | pit-B5        | St-14569-91    | MDIX01000009.1 | 93   |
| type-I | <i>A. pittii</i>    | pit-B5        | St-15559-91    | MDIY01000035.1 | 93   |
| type-I | <i>A. pittii</i>    | pit-B5        | St-15639-91    | MDIZ01000031.1 | 93   |
| type-I | <i>A. pittii</i>    | pit-B5        | ABUH403        | NDFE01000196.1 | 93   |
| type-I | <i>A. pittii</i>    | pit-B5        | ARLG1776       | NGGH01000095.1 | 93   |
| type-I | <i>A. pittii</i>    | pit-B5        | ARLG1798       | NGGQ01000048.1 | 93   |
| type-I | <i>A. pittii</i>    | pit-B5        | IHIT32685      | NWVY01000021.1 | 93   |
| type-I | <i>A. pittii</i>    | pit-B5        | IHIT32473      | NWVZ01000019.1 | 93   |
| type-I | <i>A. pittii</i>    | pit-B5        | UKK-0548       | MDIM01000224.1 | 248  |
| type-I | <i>A. pittii</i>    | pit-B5        | UKK-0556       | MDIU01000067.1 | 248  |
| type-I | <i>A. pittii</i>    | pit-B5        | PR386          | NGET01000049.1 | 248  |
| type-I | <i>A. pittii</i>    | pit-B5        | UBA2478        | DDPC01000026.1 | 396  |
| type-I | <i>A. pittii</i>    | pit-B5        | ARLG1839       | NGHJ01000054.1 | 396  |
| type-I | <i>A. pittii</i>    | pit-B5        | ARLG1768       | NGHT01000057.1 | 396  |
| type-I | <i>A. pittii</i>    | pit-B5        | PR301          | NGBT01000034.1 | 457  |
| type-I | <i>A. pittii</i>    | pit-B5        | ANC 3678       | APQN01000012.1 | 640  |
| type-I | <i>A. pittii</i>    | pit-B5        | UKK-0545       | MDII01000018.1 | 744  |
| type-I | <i>A. pittii</i>    | pit-B5        | PR368          | NGCV01000022.1 | 744  |
| type-I | <i>A. pittii</i>    | pit-B5        | PR339          | NGEB01000042.1 | 744  |
| type-I | <i>A. pittii</i>    | pit-B5        | St-19650-90    | MDHQ01000073.1 | 747  |
| type-I | <i>A. pittii</i>    | pit-B5        | NBRC 110508    | BBTR01000005.1 | 1178 |
| type-I | <i>A. pittii</i>    | pit-B5        | NBRC 110510    | BBTS01000015.1 | 1172 |
| type-I | <i>A. pittii</i>    | pit-B5        | ABBL042        | LLDW01000017.1 | nd   |
| type-I | <i>A. pittii</i>    | pit-B5        | ABBL074        | LLGE01000164.1 | nd   |
| type-I | <i>A. pittii</i>    | pit-B5        | XH765          | LYGR01000024.1 | nd   |
| type-I | <i>A. pittii</i>    | pit-B5        | ABUH540        | MSOC01000020.1 | 1175 |
| type-I | <i>A. pittii</i>    | pit-B5        | ARLG1771       | NGGG01000163.1 | 1173 |
| type-I | <i>A. pittii</i>    | pit-B5        | ARLG1875       | NGJC01000005.1 | nd   |
| type-I | <i>A. pittii</i>    | pit-B5        | 42F            | CBRO02000065.1 | nd   |
| type-I | <i>A. pittii</i>    | pit-B5        | IHIT29592      | NWVA01000016.1 | nd   |
| type-I | <i>A. pittii</i>    | pit-B5        | IHIT29469      | NWVB01000006.1 | nd   |
| type-I | <i>A. pittii</i>    | pit-B5        | IHIT24944      | NWVC010000081  | nd   |
| type-I | <i>A. pittii</i>    | bau-B3/pit-B5 | 269            | JQNV01000053.1 | 119  |
| type-I | <i>A. pittii</i>    | bau-B3/pit-B5 | NBRC 110507    | BBTZ01000082   | 119  |
| type-I | <i>A. pittii</i>    | bau-B3/pit-B5 | NBRC 110509    | BBUA01000069   | 119  |
| type-I | <i>A. pittii</i>    | bau-B3/pit-B5 | NBRC 110504    | BBTQ01000064   | 119  |
| type-I | <i>A. pittii</i>    | bau-B3/pit-B5 | CR12-42        | JQNT01000051   | 119  |
| type-I | <i>A. pittii</i>    | bau-B3/pit-B5 | A. sp. 2027    | AMJN01000042   | 119  |
| type-I | <i>A. pittii</i>    | bau-B3/pit-B5 | PR348          | NGEJ01000058   | 119  |
| type-I | <i>A. pittii</i>    | bau-B3/pit-B5 | A. sp. 1295259 | JEWG01000043   | 119  |
| type-I | <i>A. pittii</i>    | bau-B3/pit-B5 | TCM292         | LSAK01000022   | 207  |
| type-I | <i>A. pittii</i>    | bau-B3/pit-B5 | A. sp. 907131  | JEXS01000003.1 | 220  |
| type-I | <i>A. pittii</i>    | bau-B3/pit-B5 | A. sp. 883425  | JFXZ01000006.1 | 220  |
| type-I | <i>A. pittii</i>    | bau-B3/pit-B5 | NBRC 110506    | BBTY01000009   | 220  |
| type-I | <i>A. pittii</i>    | bau-B3/pit-B5 | NBRC 110505    | BBTX01000009   | 220  |
| type-I | <i>A. pittii</i>    | bau-B3/pit-B5 | A. sp. 809848  | JEXG01000029.1 | 666  |
| type-I | <i>A. pittii</i>    | bau-B3/pit-B5 | UKK-0546       | MDIJ01000142   | 776  |
| type-I | <i>A. pittii</i>    | bau-B3/pit-B5 | UKK-0540       | MDID01000164   | 778  |
| type-I | <i>A. baumannii</i> | bau-B3/pit-B5 | NIPH 329       | APQY01000009.1 | 11   |
| type-I | <i>A. pittii</i>    | bau-C3/new CT | 792879         | JFYC01000001   | 1167 |
| type-I | <i>A. baumannii</i> | bau-C3/new CT | 29D2           | MABW01000006   | 309  |
| type-I | <i>A. pittii</i>    | PIT-B6        | PR366          | NGCT01000027.1 | 312  |
| type-I | <i>A. pittii</i>    | PIT-B6        | ARLG1933       | NGII01000026   | 1165 |
| type-I | <i>A. pittii</i>    | PIT-B6        | T167           | JRQZ01000033.1 | 655  |
| type-I | <i>A. pittii</i>    | PIT-B6        | ARLG1942       | NGI001000041.1 | 795  |
| type-I | <i>A. pittii</i>    | PIT-B6        | ARLG1869       | NGIX01000002.1 | 795  |
| type-I | <i>A. pittii</i>    | PIT-B6        | IEC3385C       | NZ_CP015145.1  | 1076 |
| type-I | <i>A. pittii</i>    | PIT-B6        | 792879         | JFYC01000021   | 1167 |
| type-I | <i>A. pittii</i>    | pit-B7        | ABBL098        | LLGZ01000054.1 | 1177 |
| type-I | <i>A. pittii</i>    | pit-B7/pit-B5 | PR320          | NGDK01000009.1 | 119  |
| type-I | <i>A. pittii</i>    | pit-B7/pit-B5 | ABBL135        | LLIF01000327.1 | 119  |

|        |                  |               |                  |                |      |
|--------|------------------|---------------|------------------|----------------|------|
| type-I | <i>A. pittii</i> | pit-B7/pit-B5 | ABBL111          | LLHJ01002637.1 | 119  |
| type-I | <i>A. pittii</i> | pit-B7/pit-B5 | IPK_TSA6.1       | LWHP01000001.1 | 321  |
| type-I | <i>A. pittii</i> | pit-B7/pit-B5 | FC8876           | LBCP01000088.1 | 643  |
| type-I | <i>A. pittii</i> | pit-B7/pit-B5 | ABBL046          | LLEA01000010.1 | 643  |
| type-I | <i>A. pittii</i> | pit-B7/pit-B5 | ABBL024          | LLDE01000039.1 | 643  |
| type-I | <i>A. pittii</i> | pit-B7/pit-B5 | UBA2484          | DDOW01000009.1 | 1171 |
| type-I | <i>A. pittii</i> | pit-B7/pit-B5 | UBA2608          | DDKC01000097.1 | nd   |
| type-I | <i>A. pittii</i> | pit-B7/pit-B5 | ARLG1957         | NGIS01000052.1 | 1169 |
| type-I | <i>A. pittii</i> | pit-C5        | A. sp. 1295259   | JEWG01000048.1 | 119  |
| type-I | <i>A. pittii</i> | pit-C5        | A. baumannii 269 | JQNV01000054.1 | 119  |
| type-I | <i>A. pittii</i> | pit-C5        | AP_882           | NZ_CP014477.1  | 119  |
| type-I | <i>A. pittii</i> | pit-C5        | ABBL111          | LLHJ01000059   | 119  |
| type-I | <i>A. pittii</i> | pit-C5        | ABBL015          | LLCV01000009   | 119  |
| type-I | <i>A. pittii</i> | pit-C5        | PR348            | NGEJ01000078   | 119  |
| type-I | <i>A. pittii</i> | pit-C5        | CR12-42          | JQNT01000088   | 119  |
| type-I | <i>A. pittii</i> | pit-C5        | UKK-0550         | MDI001000081   | 119  |
| type-I | <i>A. pittii</i> | pit-C5        | UKK-0536         | MDHZ01000127   | 119  |
| type-I | <i>A. pittii</i> | pit-C5        | NBRC 110506      | BBTY01000007   | 220  |
| type-I | <i>A. pittii</i> | pit-C5        | IPK_TSA6.1       | LWHP01000001   | 321  |
| type-I | <i>A. pittii</i> | pit-C5        | ABBL024          | LLDE01000066   | 643  |
| type-I | <i>A. pittii</i> | pit-C5        | ARLG 1957        | NGIS01000002   | 1169 |
| type-I | <i>A. pittii</i> | pit-C5        | ABBL033          | LLDN01000069   | 1170 |
| type-I | <i>A. pittii</i> | pit-C5        | UBA 2484         | DDOW01000010   | 1171 |
| type-I | <i>A. pittii</i> | pit-C6        | DSM25618         | BBST01000014.1 | 63   |
| type-I | <i>A. pittii</i> | pit-C6        | UKK-0547         | MDIK01001336.1 | 63   |
| type-I | <i>A. pittii</i> | pit-C6        | ATCC19004        | APQP01000003.1 | 63   |
| type-I | <i>A. pittii</i> | pit-C6        | ABBL126          | LLHW01000293.1 | 64   |
| type-I | <i>A. pittii</i> | pit-C6        | UKK-0327         | MDHW01000178.1 | 64   |
| type-I | <i>A. pittii</i> | pit-C6        | IIF1SW-P1        | MIZX01000011.1 | 64   |
| type-I | <i>A. pittii</i> | pit-C6        | PR313            | NGCD01000037.1 | 64   |
| type-I | <i>A. pittii</i> | pit-C6        | PR370            | NGCX01000020.1 | 64   |
| type-I | <i>A. pittii</i> | pit-C6        | ARLG1779         | NGGI01000025.1 | 64   |
| type-I | <i>A. pittii</i> | pit-C6        | ARLG1803         | NGGT01000062.1 | 64   |
| type-I | <i>A. pittii</i> | pit-C6        | DSM9306          | AIEF01000088.1 | 64   |
| type-I | <i>A. pittii</i> | pit-C6        | ABBL128          | LLHY01001554.1 | 64   |
| type-I | <i>A. pittii</i> | pit-C6        | St-10592-91      | MDH001000070.1 | 64   |
| type-I | <i>A. pittii</i> | pit-C6        | St-20772-90      | MDHR01000065.1 | 64   |
| type-I | <i>A. pittii</i> | pit-C6        | St-14379-92      | MDIW01000067.1 | 64   |
| type-I | <i>A. pittii</i> | pit-C6        | Ac sp. SH024     | ADCH01000005.1 | 93   |
| type-I | <i>A. pittii</i> | pit-C6        | ABBL010          | LLCQ01000056.1 | 93   |
| type-I | <i>A. pittii</i> | pit-C6        | ABBL047          | LLEB01000058.1 | 93   |
| type-I | <i>A. pittii</i> | pit-C6        | ABBL065          | LLFK01000065.1 | 93   |
| type-I | <i>A. pittii</i> | pit-C6        | ABBL096          | LLGX01000066.1 | 93   |
| type-I | <i>A. pittii</i> | pit-C6        | ABBL120          | LLHQ01000819.1 | 93   |
| type-I | <i>A. pittii</i> | pit-C6        | St-11469-92      | MDHP01000046.1 | 93   |
| type-I | <i>A. pittii</i> | pit-C6        | UKK-0245         | MDHT01000136.1 | 93   |
| type-I | <i>A. pittii</i> | pit-C6        | UKK-0544         | MDIH01000005.1 | 93   |
| type-I | <i>A. pittii</i> | pit-C6        | UKK-0555         | MDIT01000070.1 | 93   |
| type-I | <i>A. pittii</i> | pit-C6        | St-14569-91      | MDIX01000086.1 | 93   |
| type-I | <i>A. pittii</i> | pit-C6        | St-15559-91      | MDIY01000009.1 | 93   |
| type-I | <i>A. pittii</i> | pit-C6        | St-15639-91      | MDIZ01000006.1 | 93   |
| type-I | <i>A. pittii</i> | pit-C6        | ABUH403          | NDFE01000063.1 | 93   |
| type-I | <i>A. pittii</i> | pit-C6        | PR369            | NGCW01000047.1 | 93   |
| type-I | <i>A. pittii</i> | pit-C6        | PR318            | NGDI01000015.1 | 93   |
| type-I | <i>A. pittii</i> | pit-C6        | PR346            | NGEH01000075.1 | 93   |
| type-I | <i>A. pittii</i> | pit-C6        | ARLG1776         | NGGH01000045.1 | 93   |
| type-I | <i>A. pittii</i> | pit-C6        | ARLG1798         | NGGQ01000032.1 | 93   |
| type-I | <i>A. pittii</i> | pit-C6        | ARLG1804         | NGGU01000039.1 | 93   |
| type-I | <i>A. pittii</i> | pit-C6        | ABBL103          | LLHD01000160.1 | 93   |
| type-I | <i>A. pittii</i> | pit-C6        | CEB-Ap           | NGAB01000018.1 | 93   |
| type-I | <i>A. pittii</i> | pit-C6        | IHIT32685        | NWVY01000037.1 | 93   |
| type-I | <i>A. pittii</i> | pit-C6        | IHIT32473        | NWVZ01000006.1 | 93   |
| type-I | <i>A. pittii</i> | pit-C6        | IHIT29592        | NWWA01000059.1 | 93   |
| type-I | <i>A. pittii</i> | pit-C6        | IHIT29469        | NWWB01000013.1 | 93   |
| type-I | <i>A. pittii</i> | pit-C6        | IHIT24944        | NWWC01000020.1 | 93   |
| type-I | <i>A. pittii</i> | pit-C6        | ABUH411          | MSMX01000037.1 | 248  |
| type-I | <i>A. pittii</i> | pit-C6        | UKK-0548         | MDIM01000175.1 | 248  |
| type-I | <i>A. pittii</i> | pit-C6        | UKK-0556         | MDIU01000051.1 | 248  |
| type-I | <i>A. pittii</i> | pit-C6        | PR386            | NGET01000030.1 | 248  |

|         |                         |             |                            |                |      |
|---------|-------------------------|-------------|----------------------------|----------------|------|
| type-I  | <i>A. pittii</i>        | pit-C6      | UBA2478                    | DDPC01000006.1 | 396  |
| type-I  | <i>A. pittii</i>        | pit-C6      | ARLG1839                   | NGHJ01000073.1 | 396  |
| type-I  | <i>A. pittii</i>        | pit-C6      | ARLG1768                   | NGHT01000085.1 | 396  |
| type-I  | <i>A. pittii</i>        | pit-C6      | St-12828-92                | MDIV01000077.1 | 744  |
| type-I  | <i>A. pittii</i>        | pit-C6      | PR368                      | NGCV01000039.1 | 744  |
| type-I  | <i>A. pittii</i>        | pit-C6      | PR339                      | NGEB01000026.1 | 744  |
| type-I  | <i>A. pittii</i>        | pit-C6      | NBRC 110510                | BBTS01000017.1 | 1172 |
| type-I  | <i>A. pittii</i>        | pit-C6      | ABBL005                    | LLCL01000051.1 | nd   |
| type-I  | <i>A. pittii</i>        | pit-C6      | XH765                      | LYGR01000031.1 | nd   |
| type-I  | <i>A. pittii</i>        | pit-C6      | ARLG1771                   | NGGG01000209.1 | 1173 |
| type-I  | <i>A. pittii</i>        | pit-C6      | ARLG1961                   | NGIT01000049.1 | 1174 |
| type-I  | <i>A. pittii</i>        | pit-C7      | PHEA-2                     | NC_016603.1    | 1164 |
| type-I  | <i>A. pittii</i>        | pit-C7      | <i>A. sp.</i> 1542444      | JEYA01000001.1 | 675  |
| type-I  | <i>A. baumannii</i>     | pit-C7-like | 8D1                        | MABV01000005.1 | 512  |
| type-I  | <i>A. nosocomialis</i>  | nos-C8      | GTC 03313                  | BBTJ01000037.1 | 68   |
| type-I  | <i>A. nosocomialis</i>  | nos-C8      | NBRC 110501                | BBT001000034.1 | 68   |
| type-I  | <i>A. nosocomialis</i>  | nos-C8      | NBRC 110503                | BBTP01000032.1 | 68   |
| type-I  | <i>A. nosocomialis</i>  | nos-C8      | NBRC 110502                | BBTW01000035.1 | 68   |
| type-I  | <i>A. nosocomialis</i>  | nos-C8      | UBA3105                    | DFAN01000123.1 | nd   |
| type-I  | <i>A. nosocomialis</i>  | nos-C8      | UBA3966                    | DGCY01000018.1 | 68   |
| type-I  | <i>A. nosocomialis</i>  | nos-C8      | <i>A. sp.</i> 1245593      | JFDW01000009.1 | 68   |
| type-I  | <i>A. nosocomialis</i>  | nos-C8      | <i>A. sp.</i> 1281984      | JFXD01000005.1 | 68   |
| type-I  | <i>A. nosocomialis</i>  | nos-C8      | 446_ABAU                   | JVGT01000017.1 | 68   |
| type-I  | <i>A. nosocomialis</i>  | nos-C8      | <i>A. sp.</i> FDAARGOS_131 | LORV01000006.1 | 68   |
| type-I  | <i>A. nosocomialis</i>  | nos-C8      | XH796                      | LYGC01000035.1 | nd   |
| type-I  | <i>A. nosocomialis</i>  | nos-C8      | XH762                      | LYGU01000043.1 | 68   |
| type-I  | <i>A. nosocomialis</i>  | nos-C8      | XH654                      | LYKD01000035.1 | 68   |
| type-I  | <i>A. nosocomialis</i>  | nos-C8      | XH653                      | LYKE01000040.1 | 68   |
| type-I  | <i>A. nosocomialis</i>  | nos-C8      | XH551                      | LYKW01000018.1 | 68   |
| type-I  | <i>A. nosocomialis</i>  | nos-C8      | HJ14                       | MADF01000010.1 | 217  |
| type-I  | <i>A. nosocomialis</i>  | nos-C8      | AN2605                     | NNSH01000193.1 | 68   |
| type-I  | <i>A. nosocomialis</i>  | nos-C9      | SSA3                       | NZ_CP020588.1  | 433  |
| type-I  | <i>A. nosocomialis</i>  | nos-C9      | UBA2042                    | DDBC01000042.1 | 1166 |
| type-I  | <i>A. nosocomialis</i>  | nos-C9      | TG21145                    | AMJH01000036.1 | 74   |
| type-I  | <i>A. nosocomialis</i>  | nos-C9      | NCTC 8102                  | AIEJ01000063.1 | 74   |
| type-I  | <i>A. calcoaceticus</i> | cal-C10     | ANC3680                    | NZ_KB849752.1  | 539  |
| type-I  | <i>A. calcoaceticus</i> | cal-C11     | RUH2202                    | ACPK01000025.1 | 92   |
| type-II | <i>A. baumannii</i>     | bau-D1      | 3909                       | AEOZ01000025.1 | 78   |
| type-II | <i>A. baumannii</i>     | bau-D1      | TG22142                    | ASFL01000035.1 | 78   |
| type-II | <i>A. baumannii</i>     | bau-D1      | TG22146                    | ASFM01000027.1 | 78   |
| type-II | <i>A. baumannii</i>     | bau-D1      | TG22150                    | ASF001000033.1 | 78   |
| type-II | <i>A. baumannii</i>     | bau-D1      | 1096934                    | JEXM01000056.1 | 78   |
| type-II | <i>A. baumannii</i>     | bau-D1      | 831240                     | JEY001000006.1 | 78   |
| type-II | <i>A. baumannii</i>     | bau-D1      | 855125                     | JMNT01000076.1 | 78   |
| type-II | <i>A. baumannii</i>     | bau-D1      | ABBL025                    | LLDF01000014.1 | 78   |
| type-II | <i>A. baumannii</i>     | bau-D1      | ABBL026                    | LLDG01000017.1 | 78   |
| type-II | <i>A. baumannii</i>     | bau-D1      | UH5207                     | AYFP01000025.1 | 78   |
| type-II | <i>A. baumannii</i>     | bau-D1      | UH17_52                    | JWYK03000080.1 | 78   |
| type-II | <i>A. baumannii</i>     | bau-D1      | 68SM01                     | FUEK01000010.1 | 78   |
| type-II | <i>A. baumannii</i>     | bau-D1      | 61SM01                     | FUEL01000006.1 | 78   |
| type-II | <i>A. baumannii</i>     | bau-D1      | 103SM                      | FUEM01000001.1 | 78   |
| type-II | <i>A. baumannii</i>     | bau-D1      | 14336                      | FUEN01000014.1 | 78   |
| type-II | <i>A. baumannii</i>     | bau-D1      | MGTN                       | FUE001000003.1 | 78   |
| type-II | <i>A. baumannii</i>     | bau-D1      | 96SM                       | FUEP01000001.1 | 78   |
| type-II | <i>A. baumannii</i>     | bau-D1      | 20C15                      | FUEQ01000001.1 | 78   |
| type-II | <i>A. baumannii</i>     | bau-D1      | 25C30                      | FUER01000002.1 | 78   |
| type-II | <i>A. baumannii</i>     | bau-D1      | 74SM01                     | FUES01000003.1 | 78   |
| type-II | <i>A. baumannii</i>     | bau-D1      | MONUR                      | FUET01000004.1 | 78   |
| type-II | <i>A. baumannii</i>     | bau-D1      | 2RED09                     | FUEU01000004.1 | 78   |
| type-II | <i>A. baumannii</i>     | bau-D1      | 65SM01                     | FUEV01000003.1 | 78   |
| type-II | <i>A. baumannii</i>     | bau-D1      | 72SM01                     | FUEW01000002.1 | 78   |
| type-II | <i>A. baumannii</i>     | bau-D1      | 2MG                        | FUEX01000003.1 | 78   |
| type-II | <i>A. baumannii</i>     | bau-D1      | PR308                      | NGBY01000012.1 | 78   |
| type-II | <i>A. baumannii</i>     | bau-D1      | PR355                      | NGCI01000010.1 | 78   |
| type-II | <i>A. baumannii</i>     | bau-D1      | PR371                      | NGCY01000013.1 | 78   |
| type-II | <i>A. baumannii</i>     | bau-D1      | PR385                      | NGES01000050.1 | 78   |
| type-II | <i>A. baumannii</i>     | bau-D1      | ABBL030                    | LLDK01000155.1 | 78   |
| type-II | <i>A. baumannii</i>     | bau-D1      | ABUH393                    | MSMS01000084.1 | 78   |



|         |                     |        |           |                 |    |
|---------|---------------------|--------|-----------|-----------------|----|
| type-II | <i>A. baumannii</i> | bau-D1 | 5M0       | FUEY01000001.1  | 78 |
| type-II | <i>A. baumannii</i> | bau-D1 | UH19608   | AYFZ01000199.1  | 79 |
| type-II | <i>A. baumannii</i> | bau-D1 | ABBL006   | LLCM01000053.1  | 79 |
| type-II | <i>A. baumannii</i> | bau-D1 | ABBL017   | LLCX01000017.1  | 79 |
| type-II | <i>A. baumannii</i> | bau-D1 | ABBL023   | LLDD01000202.1  | 79 |
| type-II | <i>A. baumannii</i> | bau-D1 | ABBL039   | LLDT01000063.1  | 79 |
| type-II | <i>A. baumannii</i> | bau-D1 | ABBL043   | LLDX01000121.1  | 79 |
| type-II | <i>A. baumannii</i> | bau-D1 | ABBL049   | LLED01000019.1  | 79 |
| type-II | <i>A. baumannii</i> | bau-D1 | ABBL052   | LEEG01000062.1  | 79 |
| type-II | <i>A. baumannii</i> | bau-D1 | ABBL055   | LLFA01000065.1  | 79 |
| type-II | <i>A. baumannii</i> | bau-D1 | ABBL056   | LLFB01000068.1  | 79 |
| type-II | <i>A. baumannii</i> | bau-D1 | ABBL067a  | LLFN01000267.1  | 79 |
| type-II | <i>A. baumannii</i> | bau-D1 | ABBL067b  | LLF001000279.1  | 79 |
| type-II | <i>A. baumannii</i> | bau-D1 | ABBL067j  | LLFV01000130.1  | 79 |
| type-II | <i>A. baumannii</i> | bau-D1 | ABBL067k  | LLFW01000040.1  | 79 |
| type-II | <i>A. baumannii</i> | bau-D1 | ABBL067l  | LLFX01000045.1  | 79 |
| type-II | <i>A. baumannii</i> | bau-D1 | ABBL068   | LLFY01000087.1  | 79 |
| type-II | <i>A. baumannii</i> | bau-D1 | ABBL069   | LLFZ01000171.1  | 79 |
| type-II | <i>A. baumannii</i> | bau-D1 | ABBL101   | LLHB01000147.1  | 79 |
| type-II | <i>A. baumannii</i> | bau-D1 | ABOB01    | LLIQ01000018.1  | 79 |
| type-II | <i>A. baumannii</i> | bau-D1 | ABOB03    | LLIS01000428.1  | 79 |
| type-II | <i>A. baumannii</i> | bau-D1 | ABOB04    | LLIT01000118.1  | 79 |
| type-II | <i>A. baumannii</i> | bau-D1 | ABOB04_a  | LLIU01000358.1  | 79 |
| type-II | <i>A. baumannii</i> | bau-D1 | ABOB06    | LLIW01000299.1  | 79 |
| type-II | <i>A. baumannii</i> | bau-D1 | ABOB08    | LLIZ01000032.1  | 79 |
| type-II | <i>A. baumannii</i> | bau-D1 | ABOB12    | LLJD01000055.1  | 79 |
| type-II | <i>A. baumannii</i> | bau-D1 | ABOBEN    | LLJG01000034.1  | 79 |
| type-II | <i>A. baumannii</i> | bau-D1 | Ab28      | LMBQ01000001.1  | 79 |
| type-II | <i>A. baumannii</i> | bau-D1 | CU032113  | LXYW01000010.1  | 79 |
| type-II | <i>A. baumannii</i> | bau-D1 | ABUH564   | MSOI01000045.1  | 79 |
| type-II | <i>A. baumannii</i> | bau-D1 | 499       | MWPK01000002.1  | 79 |
| type-II | <i>A. baumannii</i> | bau-D1 | 923       | MWPO01000003.1  | 79 |
| type-II | <i>A. baumannii</i> | bau-D1 | ABUH505   | NCXV01000092.1  | 79 |
| type-II | <i>A. baumannii</i> | bau-D1 | ABUH428   | NCYV01000132.1  | 79 |
| type-II | <i>A. baumannii</i> | bau-D1 | ARLG-1775 | NEQF01000006.1  | 79 |
| type-II | <i>A. baumannii</i> | bau-D1 | ARLG-1860 | NEQK01000117.1  | 79 |
| type-II | <i>A. baumannii</i> | bau-D1 | AF-401    | NZ_CP018254.1   | 79 |
| type-II | <i>A. baumannii</i> | bau-D1 | UH106_440 | JWUZ03000197.1  | 79 |
| type-II | <i>A. baumannii</i> | bau-D1 | UH106_429 | JWVB03000032.1  | 79 |
| type-II | <i>A. baumannii</i> | bau-D1 | UH535_423 | JWVC03000014.1  | 79 |
| type-II | <i>A. baumannii</i> | bau-D1 | ABBL035   | LLDP01000111.1  | 79 |
| type-II | <i>A. baumannii</i> | bau-D1 | ABBL037   | LLDR01000050.1  | 79 |
| type-II | <i>A. baumannii</i> | bau-D1 | ABBL050   | LLEE01000153.1  | 79 |
| type-II | <i>A. baumannii</i> | bau-D1 | ABBL053   | LLEH01000059.1  | 79 |
| type-II | <i>A. baumannii</i> | bau-D1 | ABBL066   | LLFL01000048.1  | 79 |
| type-II | <i>A. baumannii</i> | bau-D1 | ABBL067   | LLFM01000081.1  | 79 |
| type-II | <i>A. baumannii</i> | bau-D1 | ABBL067c  | LLFP01000234.1  | 79 |
| type-II | <i>A. baumannii</i> | bau-D1 | ABBL067e  | LLFQ01000141.1  | 79 |
| type-II | <i>A. baumannii</i> | bau-D1 | ABBL067f  | LLFR01000205.1  | 79 |
| type-II | <i>A. baumannii</i> | bau-D1 | ABBL067g  | LLFS01000014.1  | 79 |
| type-II | <i>A. baumannii</i> | bau-D1 | ABBL067h  | LLFT01000096.1  | 79 |
| type-II | <i>A. baumannii</i> | bau-D1 | ABBL067i  | LLFU01000254.1  | 79 |
| type-II | <i>A. baumannii</i> | bau-D1 | ABBL079   | LLGJ01000170.1  | 79 |
| type-II | <i>A. baumannii</i> | bau-D1 | ABBL083   | LLGM01000149.1  | 79 |
| type-II | <i>A. baumannii</i> | bau-D1 | ABBL105   | LLHE01000176.1  | 79 |
| type-II | <i>A. baumannii</i> | bau-D1 | ABBL106   | LLHF01000121.1  | 79 |
| type-II | <i>A. baumannii</i> | bau-D1 | ABBL117   | LLH001000219.1  | 79 |
| type-II | <i>A. baumannii</i> | bau-D1 | ABBL118   | LLHP010000616.1 | 79 |
| type-II | <i>A. baumannii</i> | bau-D1 | ABBL122   | LLHS01000277.1  | 79 |
| type-II | <i>A. baumannii</i> | bau-D1 | ABBL127   | LLHX01000342.1  | 79 |
| type-II | <i>A. baumannii</i> | bau-D1 | ABOB02    | LLIR01000425.1  | 79 |
| type-II | <i>A. baumannii</i> | bau-D1 | ABOB04_b  | LLIV01000188.1  | 79 |
| type-II | <i>A. baumannii</i> | bau-D1 | ABOB06_a  | LLIX01000047.1  | 79 |
| type-II | <i>A. baumannii</i> | bau-D1 | ABOB07    | LLIY01000105.1  | 79 |
| type-II | <i>A. baumannii</i> | bau-D1 | ABOB09    | LLJA01000175.1  | 79 |
| type-II | <i>A. baumannii</i> | bau-D1 | ABOB10    | LLJB01000197.1  | 79 |
| type-II | <i>A. baumannii</i> | bau-D1 | Ab23      | LMB001000002.1  | 79 |
| type-II | <i>A. baumannii</i> | bau-D1 | ORABashR  | LRMG01000196.1  | 79 |
| type-II | <i>A. baumannii</i> | bau-D1 | ORABriCT  | LRMH01000055.1  | 79 |

|         |              |        |               |                  |      |
|---------|--------------|--------|---------------|------------------|------|
| type-II | A. baumannii | bau-D1 | LIM891        | LUUZ01000291.1   | 79   |
| type-II | A. baumannii | bau-D1 | LIM994        | LUVA01000276.1   | 79   |
| type-II | A. baumannii | bau-D1 | LIM929        | LUVB01000368.1   | 79   |
| type-II | A. baumannii | bau-D1 | LIM997        | LUV01000003.1    | 79   |
| type-II | A. baumannii | bau-D1 | LIM939        | LUV01000521.1    | 79   |
| type-II | A. baumannii | bau-D1 | LIM1013       | LUV01001894.1    | 79   |
| type-II | A. baumannii | bau-D1 | LIM1011       | LUVF01002386.1   | 79   |
| type-II | A. baumannii | bau-D1 | LIM1049       | LUVG01000004.1   | 79   |
| type-II | A. baumannii | bau-D1 | LIM1126       | LUVH01000004.1   | 79   |
| type-II | A. baumannii | bau-D1 | LIM1099       | LUVI01000006.1   | 79   |
| type-II | A. baumannii | bau-D1 | LIM1018       | LUVJ01001272.1   | 79   |
| type-II | A. baumannii | bau-D1 | LIM1029       | LUVK01000007.1   | 79   |
| type-II | A. baumannii | bau-D1 | LIM1128       | LUVL01000225.1   | 79   |
| type-II | A. baumannii | bau-D1 | LIM941        | MANL01000869.1   | 79   |
| type-II | A. baumannii | bau-D1 | AR_0036       | MPBY01000002.1   | 79   |
| type-II | A. baumannii | bau-D1 | ABUH642       | MSNJ01000071.1   | 79   |
| type-II | A. baumannii | bau-D1 | ABUH516       | MSPM01000075.1   | 79   |
| type-II | A. baumannii | bau-D1 | 502           | MWPL01000003.1   | 79   |
| type-II | A. baumannii | bau-D1 | 891           | MWPM01000003.1   | 79   |
| type-II | A. baumannii | bau-D1 | 895           | MWPN01000006.1   | 79   |
| type-II | A. baumannii | bau-D1 | 991           | MWPP01000005.1   | 79   |
| type-II | A. baumannii | bau-D1 | ABUH502       | NCXU01000046.1   | 79   |
| type-II | A. baumannii | bau-D1 | ABUH363       | NCZR01000137.1   | 79   |
| type-II | A. baumannii | bau-D1 | PR323         | NGDN01000081.1   | 79   |
| type-II | A. baumannii | bau-D1 | ARL61858      | NGGD01000064.1   | 79   |
| type-II | A. baumannii | bau-D1 | ARL61864      | NGIV01000047.1   | 79   |
| type-II | A. baumannii | bau-D1 | AB030         | NZ_CP009257.1    | 79   |
| type-II | A. baumannii | bau-D1 | AbH120-A2     | NZ_CP009534.1    | 79   |
| type-II | A. baumannii | bau-D1 | 11598         | MSCZ01000020.1   | 156  |
| type-II | A. baumannii | bau-D1 | 4113          | MSDA01000030.1   | 156  |
| type-II | A. baumannii | bau-D1 | 11547         | MSDB01000016.1   | 156  |
| type-II | A. baumannii | bau-D1 | 11502         | MSCX01000013.1   | 156  |
| type-II | A. baumannii | bau-D1 | 11536         | MSCY01000013.1   | 156  |
| type-II | A. baumannii | bau-D1 | 11551         | MSDC01000013.1   | 156  |
| type-II | A. baumannii | bau-D1 | 11606         | MSDD01000011.1   | 156  |
| type-II | A. baumannii | bau-D1 | TG02011       | ASES01000026.1   | 422  |
| type-II | A. baumannii | bau-D1 | UH7607        | AYFH01000099.1   | 422  |
| type-II | A. baumannii | bau-D1 | UH6907        | AYFJ01000032.1   | 422  |
| type-II | A. baumannii | bau-D1 | UH22908       | AYFV01000030.1   | 422  |
| type-II | A. baumannii | bau-D1 | UH16208       | AYGB01000074.1   | 422  |
| type-II | A. baumannii | bau-D1 | UH12208       | AYGK01000073.1   | 422  |
| type-II | A. baumannii | bau-D1 | 3207          | NZ_CP015364.1    | 422  |
| type-II | A. baumannii | bau-D1 | AB_1583-8     | AMHC01000214.1   | 422  |
| type-II | A. baumannii | bau-D1 | AB_TG27343    | AMIS01000029.1   | 422  |
| type-II | A. baumannii | bau-D1 | UH7907        | AYFE01000114.1   | 422  |
| type-II | A. baumannii | bau-D1 | A33405        | JPXZ01000025.1   | 422  |
| type-II | A. baumannii | bau-D1 | 1412924       | JFEF01000001.1   | 510  |
| type-II | A. baumannii | bau-D1 | 342950        | JEWZ01000078.1   | 512  |
| type-II | A. baumannii | bau-D1 | 1295549       | JFXB01000001.1   | 652  |
| type-II | A. baumannii | bau-D1 | 277047        | JFXS01000001.1   | 652  |
| type-II | A. baumannii | bau-D1 | 426863        | JFYF01000001.1   | 652  |
| type-II | A. baumannii | bau-D1 | CCBH15815_Y_1 | NLC001000001.1   | 730  |
| type-II | A. baumannii | bau-D3 | ARL1814       | NGGY01000078.1   | 32   |
| type-II | A. baumannii | bau-D3 | 1525283       | JEXR0100002/64.1 | 32   |
| type-II | A. baumannii | bau-D3 | 781407        | JEZS01000001.1   | 32   |
| type-II | A. baumannii | bau-D5 | NIPH_67       | APRA01000004.1   | 35   |
| type-II | A. baumannii | bau-D6 | 1035119       | JEVY01000001.1   | 536  |
| type-II | A. baumannii | bau-D6 | 8D1           | MABV01000021.1   | 512  |
| type-II | A. baumannii | bau-D6 | 01D3-2        | NIWQ01000001.1   | 240  |
| type-II | A. baumannii | bau-D6 | 86II/2C       | NIWI01000010.1   | 690  |
| type-II | A. baumannii | bau-D6 | PLG9P835      | NIWR01000002.1   | 1179 |
| type-II | A. baumannii | bau-D7 | M3AC9-7       | JTEC01000010.1   | 250  |
| type-II | A. baumannii | bau-D7 | UH392_659     | JWTR03000141     | 250  |
| type-II | A. baumannii | bau-D7 | UH592_595     | JZJE02000126     | 250  |
| type-II | A. baumannii | bau-D7 | ABBL149       | LLIP01000073.1   | 250  |
| type-II | A. baumannii | bau-D7 | UH592_599     | JZJD02000204.1   | 250  |
| type-II | A. baumannii | bau-D7 | ABBL122       | LLHS01000277.1   | 250  |
| type-II | A. baumannii | bau-D7 | CCF12         | LZAF01000035.1   | 250  |
| type-II | A. baumannii | bau-D7 | CCF50         | LZBF01000052.1   | 250  |

|         |              |         |                    |                |     |
|---------|--------------|---------|--------------------|----------------|-----|
| type-II | A. baumannii | bau-D7  | ABUH797            | LZUU01000019.1 | 250 |
| type-II | A. baumannii | bau-D7  | ABUH399            | MSMU01000040.1 | 250 |
| type-II | A. baumannii | bau-D7  | ABUH675            | MSNS01000001.1 | 250 |
| type-II | A. baumannii | bau-D7  | ABUH631            | NCZW01000042.1 | 250 |
| type-II | A. baumannii | bau-D7  | ABUH638            | NCZZ01000005.1 | 250 |
| type-II | A. baumannii | bau-D7  | ABUH650            | NDAD01000033.1 | 250 |
| type-II | A. baumannii | bau-D7  | ABUH658            | NDAF01000140.1 | 250 |
| type-II | A. baumannii | bau-D7  | ABUH619            | NDAY01000053.1 | 250 |
| type-II | A. baumannii | bau-D7  | ARLG1898           | NGHX01000065.1 | 250 |
| type-II | A. baumannii | bau-D7  | ARLG1906           | NGID01000040.1 | 250 |
| type-II | A. baumannii | bau-D7  | ARLG1891           | NGJI01000045.1 | 250 |
| type-II | A. baumannii | bau-D7  | 247                | NSJA01000052.1 | 286 |
| type-II | A. baumannii | bau-D7  | XH681              | LYJI01000001.1 | 879 |
| type-II | A. baumannii | bau-D9  | TG27387            | ASGJ01000040.1 | 6   |
| type-II | A. baumannii | bau-D9  | ABBL011            | LLCR01000058.1 | 6   |
| type-II | A. baumannii | bau-D9  | XH730              | LYHV01000013.1 | 46  |
| type-II | A. baumannii | bau-D9  | XH674              | LYJP01000037.1 | 46  |
| type-II | A. baumannii | bau-D9  | XH673              | LYJQ01000034.1 | 46  |
| type-II | A. baumannii | bau-D9  | XH668              | LYJV01000010.1 | 46  |
| type-II | A. baumannii | bau-D9  | XH664              | LYJZ01000001.1 | 46  |
| type-II | A. baumannii | bau-D9  | XH662              | LYKB01000388.1 | 46  |
| type-II | A. baumannii | bau-D9  | XH661              | LYKC01000040.1 | 46  |
| type-II | A. baumannii | bau-D9  | XH648              | LYKH01000001.1 | 46  |
| type-II | A. baumannii | bau-D9  | XH647              | LYKI01000023.1 | 46  |
| type-II | A. baumannii | bau-D9  | XH642              | LYKN01000001.1 | 46  |
| type-II | A. baumannii | bau-D9  | XH641              | LYK001000001.1 | 46  |
| type-II | A. baumannii | bau-D9  | XH553              | LYKU01000207.1 | 46  |
| type-II | A. baumannii | bau-D9  | XH545              | LYLC01000001.1 | 46  |
| type-II | A. baumannii | bau-D9  | XH512              | LYLG01000001   | 46  |
| type-II | A. baumannii | bau-D9  | AE3M               | FWFB01000092.1 | 85  |
| type-II | A. baumannii | bau-D9  | AE27M              | FWW001000046.1 | 85  |
| type-II | A. baumannii | bau-D9  | AC40M              | FWYN01000006.1 | 85  |
| type-II | A. baumannii | bau-D9  | ACMH-6200          | LKMA01000064.1 | 85  |
| type-II | A. baumannii | bau-D9  | ACMH-6201          | LKMB01000010.1 | 85  |
| type-II | A. baumannii | bau-D9  | AB-A               | LWSM01000068.1 | 85  |
| type-II | A. baumannii | bau-D9  | AB-B               | LWSN01000050.1 | 85  |
| type-II | A. baumannii | bau-D9  | AB-C               | LWS001000056.1 | 85  |
| type-II | A. baumannii | bau-D9  | AR_0037            | MPBX01000005.1 | 85  |
| type-II | A. baumannii | bau-D9  | AR_0033            | MPCA01000001.1 | 85  |
| type-II | A. baumannii | bau-D9  | MBL_M4             | MWTU01000196.1 | 85  |
| type-II | A. baumannii | bau-D9  | MBL_M6             | MWTW01000060.1 | 85  |
| type-II | A. baumannii | bau-D9  | B11911             | LFYX01000003.1 | 149 |
| type-II | A. baumannii | bau-D9  | PR361              | NGC001000049.1 | 464 |
| type-II | A. baumannii | bau-D9  | 6200               | NZ_CP010397.1  | 464 |
| type-II | A. baumannii | bau-D9  | 1297549            | JEVV01000001.1 | 528 |
| type-II | A. baumannii | bau-D9  | ARLG1326           | NGHQ01000027.1 | 973 |
| type-II | A. baumannii | bau-D9  | ABBL067            | LLFM01000081.1 | nd  |
| type-II | A. baumannii | bau-D9  | AB360              | NGKM01000001.1 | 622 |
| type-II | A. baumannii | bau-D9  | IOMTU433           | NZ_AP014649.1  | 622 |
| type-II | A. baumannii | bau-D9  | XH729              | LYHW01000042.1 | nd  |
| type-II | A. baumannii | bau-D9  | XH703              | LYIS01000022.1 | nd  |
| type-II | A. baumannii | bau-D9  | SP1917             | LFYW01000006.1 | nd  |
| type-II | A. baumannii | bau-D10 | AB900              | ABXK01000016.1 | 49  |
| type-II | A. baumannii | bau-D10 | OIFC111            | AMFY01000003.1 | 49  |
| type-II | A. baumannii | bau-D10 | 1461963            | JEVQ01000007.1 | 49  |
| type-II | A. baumannii | bau-D10 | 1293320            | JFEE01000003.1 | 49  |
| type-II | A. baumannii | bau-D10 | ABBL070            | LLGA01000031.1 | 49  |
| type-II | A. baumannii | bau-D10 | ABBL071            | LLGB01000025.1 | 49  |
| type-II | A. baumannii | bau-D11 | TG22198            | ASFT01000014.1 | 164 |
| type-II | A. baumannii | bau-D11 | AB_2007-16-25-01-7 | AMHI01000047.1 | 241 |
| type-II | A. baumannii | bau-D11 | AB_2007-16-27-01   | AMHJ01000047.1 | 241 |
| type-II | A. baumannii | bau-D11 | AB_TG27339         | AMIR01000013.1 | 241 |
| type-II | A. baumannii | bau-D11 | 118362             | JEWB01000070.1 | 241 |
| type-II | A. baumannii | bau-D12 | UMB002             | AEPL01000028.1 | 16  |
| type-II | A. baumannii | bau-D12 | 268680             | JEYN01000009.1 | 16  |
| type-II | A. baumannii | bau-D12 | 1043794            | JEYX01000007.1 | 16  |
| type-II | A. baumannii | bau-D12 | 972082             | JFAA01000074.1 | 16  |
| type-II | A. baumannii | bau-D12 | 655378             | JFCE02000001.1 | 16  |
| type-II | A. baumannii | bau-D12 | 1064293_45         | JFDS01000016.1 | 16  |

|         |                       |         |                |                |      |
|---------|-----------------------|---------|----------------|----------------|------|
| type-II | <i>A. baumannii</i>   | bau-D12 | FDAARGOS_123   | LORJ01000003   | 16   |
| type-II | <i>A. baumannii</i>   | bau-D12 | 232184         | JEYI01000006   | 16   |
| type-II | <i>A. baumannii</i>   | bau-D12 | J65            | LAKP01000059.1 | 16   |
| type-II | <i>A. baumannii</i>   | bau-D12 | BAL 255        | CZWB01000012.1 | 16   |
| type-II | <i>A. baumannii</i>   | bau-D12 | SIUA6 17       | NIUK01000031.1 | 16   |
| type-II | <i>A. baumannii</i>   | bau-D12 | NIPH 601       | APQZ01000007.1 | 40   |
| type-II | <i>A. baumannii</i>   | bau-D12 | GTC 03322      | BBNF10000040.1 | 40   |
| type-II | <i>A. baumannii</i>   | bau-D12 | GTC 03323      | BBNG01000002.1 | 40   |
| type-II | <i>A. baumannii</i>   | bau-D12 | GTC 03328      | BBNI01000006.1 | 40   |
| type-II | <i>A. baumannii</i>   | bau-D12 | NBRC 110489    | BBOP01000045.1 | 40   |
| type-II | <i>A. baumannii</i>   | bau-D12 | NBRC 110491    | BBTC01000006.1 | 40   |
| type-II | <i>A. baumannii</i>   | bau-D12 | A118           | AEOW01001006.1 | 404  |
| type-II | <i>A. baumannii</i>   | bau-D12 | ZW85-1         | NC_023028.1    | 639  |
| type-II | <i>A. baumannii</i>   | bau-D13 | NIPH 60        | APPM01000011.1 | 34   |
| type-II | <i>A. baumannii</i>   | bau-D13 | NBRC 110492    | BBTD01000008.1 | 34   |
| type-II | <i>A. baumannii</i>   | bau-D13 | NIPH 201       | APQV01000007.1 | 38   |
| type-II | <i>A. baumannii</i>   | bau-D13 | DSM 30011      | JJOC01000003.1 | 738  |
| type-II | <i>A. baumannii</i>   | bau-D13 | Naval-72       | AMFI01000006.1 | 405  |
| type-II | <i>A. baumannii</i>   | bau-D14 | 1267820        | JEWD01000063.1 | 103  |
| type-II | <i>A. baumannii</i>   | bau-D14 | AB031          | NZ_CP009256.1  | 638  |
| type-II | <i>A. baumannii</i>   | bau-D15 | AB3638 LV38    | LRDW01000016.1 | 25   |
| type-II | <i>A. baumannii</i>   | bau-D15 | 4190           | AEPA01000264.1 | 25   |
| type-II | <i>A. baumannii</i>   | bau-D15 | UMB003         | AEPM01000002.1 | 25   |
| type-II | <i>A. baumannii</i>   | bau-D15 | Naval-18       | AFDA02000003   | 25   |
| type-II | <i>A. baumannii</i>   | bau-D15 | OIFC143        | AFDL01000004   | 25   |
| type-II | <i>A. baumannii</i>   | bau-D15 | AB5256         | AHAI01000041.1 | 25   |
| type-II | <i>A. baumannii</i>   | bau-D15 | NIPH146        | APOU01000021.1 | 25   |
| type-II | <i>A. baumannii</i>   | bau-D15 | CI86           | AVOB01000072.1 | 25   |
| type-II | <i>A. baumannii</i>   | bau-D15 | CI79           | AVOD01000049.1 | 25   |
| type-II | <i>A. baumannii</i>   | bau-D15 | 107m           | CBSG01000032.1 | 25   |
| type-II | <i>A. baumannii</i>   | bau-D15 | 984213         | JEVX01000013.1 | 25   |
| type-II | <i>A. baumannii</i>   | bau-D15 | 1429530        | JEWM01000001.1 | 25   |
| type-II | <i>A. baumannii</i>   | bau-D15 | RUH1486        | JZBU01000024.1 | 25   |
| type-II | <i>A. baumannii</i>   | bau-D15 | NM3            | JZBV01000044.1 | 25   |
| type-II | <i>A. baumannii</i>   | bau-D15 | LUH_6220       | JZBW01000052.1 | 25   |
| type-II | <i>A. baumannii</i>   | bau-D15 | 4390           | JZBY01000157.1 | 25   |
| type-II | <i>A. baumannii</i>   | bau-D15 | 741019         | JZBZ01000009.1 | 25   |
| type-II | <i>A. baumannii</i>   | bau-D15 | 161/07         | JZCA01000061.1 | 25   |
| type-II | <i>A. baumannii</i>   | bau-D15 | ABBL018        | LLCY01000148.1 | 25   |
| type-II | <i>A. baumannii</i>   | bau-D15 | AB2828 LV35    | LRDT01000061.1 | 25   |
| type-II | <i>A. baumannii</i>   | bau-D15 | AB3806 LV40    | LRDY01000030.1 | 25   |
| type-II | <i>A. baumannii</i>   | bau-D15 | PR388          | NGEV01000035.1 | 25   |
| type-II | <i>A. baumannii</i>   | bau-D15 | ARLG1317       | NGH001000017.1 | 25   |
| type-II | <i>A. baumannii</i>   | bau-D15 | NIPH146        | KB849308.1     | 25   |
| type-II | <i>A. baumannii</i>   | bau-D15 | HWBA8          | NZ_CP020597    | 25   |
| type-II | <i>A. baumannii</i>   | bau-D15 | AB_2008-15-69  | AMHN01000069.1 | 25   |
| type-II | <i>A. baumannii</i>   | bau-D15 | R2091          | NZ_LN997846.1  | 126  |
| type-II | <i>A. baumannii</i>   | bau-D15 | P630           | CBYG01000034.1 | 126  |
| type-II | <i>A. baumannii</i>   | bau-D15 | 233846         | JMOG01000008.1 | 126  |
| type-II | <i>A. baumannii</i>   | bau-D15 | PR337          | NGEA01000014.1 | 126  |
| type-II | <i>A. baumannii</i>   | bau-D15 | CIP70.10       | NZ_LN865143.1  | 126  |
| type-II | <i>A. baumannii</i>   | bau-D15 | LUH_7841       | JZBX01000006.1 | 402  |
| type-II | <i>A. baumannii</i>   | bau-D16 | NIPH 615       | APOV01000028.1 | 12   |
| type-II | <i>A. baumannii</i>   | bau-D17 | AB967          | LRDS01000005   | 48   |
| type-II | <i>A. baumannii</i>   | bau-D17 | ABUH397        | NCY001000022.1 | 48   |
| type-II | <i>A. baumannii</i>   | bau-D17 | PR356          | NGCJ01000033.1 | 48   |
| type-II | <i>A. baumannii</i>   | bau-D17 | PR343          | NGEE01000017.1 | 48   |
| type-II | <i>A. baumannii</i>   | bau-D17 | ARLG1830       | NGHE01000010.1 | 48   |
| type-II | <i>A. baumannii</i>   | bau-D17 | 1598530        | JMOE01000001.1 | 56   |
| type-II | <i>A. baumannii</i>   | bau-D17 | OIFC035        | AMTB01000006.1 | 403  |
| type-II | <i>A. baumannii</i>   | bau-D17 | Ab5            | LANH01000043   | nd   |
| type-II | <i>A. baumannii</i>   | bau-D19 | 1062314        | JFDR01000001.1 | 54   |
| type-II | <i>A. baumannii</i>   | bau-D19 | 99063          | JEXJ01000070   | 506  |
| type-II | <i>A. baumannii</i>   | bau-D20 | 299505         | JEWY01000048   | 508  |
| type-II | <i>A. baumannii</i>   | bau-D21 | 219_ABAU       | JVPN01000006.1 | 1140 |
| type-II | <i>A. baumannii</i>   | bau-D21 | ABBL110        | LLHI01000268.1 | nd   |
| type-II | <i>A. baumannii</i>   | bau-D21 | LIM1820        | LUUY01000276.1 | 107  |
| type-II | <i>A. baumannii</i>   | bau-D2  | SDF            | CU468230       | 17   |
| type-II | <i>A.nosocomialis</i> | nos-D2  | Ac. sp.1424608 | JFXL01000001.1 | 279  |

|         |                       |         |                           |                |      |
|---------|-----------------------|---------|---------------------------|----------------|------|
| type-II | <i>A.nosocomialis</i> | nos-D2  | Ac.sp. 21871              | JEWV01000004.1 | 279  |
| type-II | <i>A.nosocomialis</i> | nos-D2  | Ac. sp. 25977_8           | JFVJ01000007.1 | 501  |
| type-II | <i>A.nosocomialis</i> | nos-D2  | Ac. sp. 25977_7           | JFVK01000003.1 | 501  |
| type-II | <i>A.nosocomialis</i> | nos-D2  | Ac. sp. 25977_6           | JFVL01000006.1 | 501  |
| type-II | <i>A.nosocomialis</i> | nos-D2  | Ac. sp. 25977_4           | JFVM01000009.1 | 501  |
| type-II | <i>A.nosocomialis</i> | nos-D2  | Ac. sp. 25977_3           | JFVN01000007.1 | 501  |
| type-II | <i>A.nosocomialis</i> | nos-D2  | Ac. sp. 25977_2           | JFV001000008.1 | 501  |
| type-II | <i>A.nosocomialis</i> | nos-D2  | Ac. sp. 25977_1           | JFVP01000009.1 | 501  |
| type-II | <i>A.nosocomialis</i> | nos-D2  | Ac. sp. 796380-1375       | JMOS01000007.1 | 501  |
| type-II | <i>A.nosocomialis</i> | nos-D2  | Ac. sp. 25977_9           | JMPF01000048.1 | 501  |
| type-II | <i>A.nosocomialis</i> | nos-D2  | Ac. sp. 25977_10          | JFVQ01000046.1 | 501  |
| type-II | <i>A.nosocomialis</i> | nos-D2  | TG19596                   | AMIZ01000051.1 | 501  |
| type-II | <i>A.nosocomialis</i> | nos-D2  | UBA5656                   | DIJA01000032.1 | 501  |
| type-II | <i>A.nosocomialis</i> | nos-D2  | GTC 3312                  | BB0001000030.1 | 1181 |
| type-II | <i>A.nosocomialis</i> | nos-D2  | NBRC 110500               | BB0T01000029.1 | 1181 |
| type-II | <i>A.nosocomialis</i> | nos-D2  | UBA873                    | DBFT01000089.1 | nd   |
| type-II | <i>A.nosocomialis</i> | nos-D4  | GTC 03313                 | BBTJ01000007.1 | 68   |
| type-II | <i>A.nosocomialis</i> | nos-D4  | NBRC 110501               | BBT001000005.1 | 68   |
| type-II | <i>A.nosocomialis</i> | nos-D4  | NBRC 110503               | BBTP01000005.1 | 68   |
| type-II | <i>A.nosocomialis</i> | nos-D4  | NBRC 110502               | BBTW01000005.1 | 68   |
| type-II | <i>A.nosocomialis</i> | nos-D4  | UBA3966                   | DGCY01000183.1 | 68   |
| type-II | <i>A.nosocomialis</i> | nos-D4  | Ac. sp. 1281984           | JFXD01000001.1 | 68   |
| type-II | <i>A.nosocomialis</i> | nos-D4  | 446_ABAU                  | JVGT01000060.1 | 68   |
| type-II | <i>A.nosocomialis</i> | nos-D4  | Ac. sp. FDAARGOS_131      | LORV01000006.1 | 68   |
| type-II | <i>A.nosocomialis</i> | nos-D4  | XH762                     | LYGU01000023.1 | 68   |
| type-II | <i>A.nosocomialis</i> | nos-D4  | XH654                     | LYKD01000057.1 | 68   |
| type-II | <i>A.nosocomialis</i> | nos-D4  | XH653                     | LYKE01000040.1 | 68   |
| type-II | <i>A.nosocomialis</i> | nos-D4  | XH551                     | LYKW01000034.1 | 68   |
| type-II | <i>A.nosocomialis</i> | nos-D4  | ABBL080                   | LLGK01000451.1 | 71   |
| type-II | <i>A.nosocomialis</i> | nos-D4  | ABUH381                   | NDFD01000029.1 | 71   |
| type-II | <i>A.nosocomialis</i> | nos-D4  | 259052                    | JEYJ01000008.1 | 71   |
| type-II | <i>A.nosocomialis</i> | nos-D4  | 1592897                   | JEYK02000002.1 | 71   |
| type-II | <i>A.nosocomialis</i> | nos-D4  | 28F                       | CBSD02000036.1 | 71   |
| type-II | <i>A.nosocomialis</i> | nos-D4  | HJ14                      | MADF01000001.1 | 217  |
| type-II | <i>A.nosocomialis</i> | nos-D4  | UBA1655                   | DCLF01000050.1 | 410  |
| type-II | <i>A.nosocomialis</i> | nos-D4  | UBA4562                   | DGKU01000019.1 | 410  |
| type-II | <i>A.nosocomialis</i> | nos-D4  | NIPH 386                  | APPP01000013.1 | 410  |
| type-II | <i>A.nosocomialis</i> | nos-D4  | 1396970                   | JEWI01000055.1 | 410  |
| type-II | <i>A.nosocomialis</i> | nos-D4  | 694762                    | JFEV01000024.1 | 410  |
| type-II | <i>A.nosocomialis</i> | nos-D4  | WC-487                    | AMZR01000082.1 | 410  |
| type-II | <i>A.nosocomialis</i> | nos-D4  | Ac. sp.1396970            | ACQF02000020.1 | 410  |
| type-II | <i>A.nosocomialis</i> | nos-D4  | UBA2098                   | DCYY01000023.1 | 1182 |
| type-II | <i>A.nosocomialis</i> | nos-D4  | UBA2046                   | DDAY01000142.1 | 1183 |
| type-II | <i>A.nosocomialis</i> | nos-D4  | A. baumannii 1            | JSAO01000067.1 | 1184 |
| type-II | <i>A.nosocomialis</i> | nos-D4  | UBA3105                   | DFAN01000186.1 | nd   |
| type-II | <i>A.nosocomialis</i> | nos-D4  | XH796                     | LYGC01000024.1 | nd   |
| type-II | <i>A.nosocomialis</i> | nos-D4  | UBA5077                   | DIAN01000118.1 | nd   |
| type-II | <i>A.nosocomialis</i> | nos-D4  | UBA6700                   | DKJE01000061.1 | nd   |
| type-II | <i>A.nosocomialis</i> | nos-D8  | Ac. sp. TG21145           | AMJH01000037   | 74   |
| type-II | <i>A.nosocomialis</i> | nos-D12 | OIFC021                   | AMFR01000029.1 | 224  |
| type-II | <i>A.nosocomialis</i> | nos-D12 | 766875                    | JEXX01000001.1 | 224  |
| type-II | <i>A.nosocomialis</i> | nos-D18 | NIPH 2119                 | APOP01000003.1 | 76   |
| type-II | <i>A.nosocomialis</i> | nos-D18 | LMG 10619                 | BBSR01000002.1 | 76   |
| type-II | <i>A.nosocomialis</i> | nos-D18 | 216872                    | JFEM01000009.1 | 530  |
| type-II | <i>A.nosocomialis</i> | nos-D18 | BIDMC 57                  | JMUI01000011.1 | 530  |
| type-II | <i>A.nosocomialis</i> | nos-D22 | UBA3970                   | DGCU01000061   | ND   |
| type-II | <i>A.nosocomialis</i> | nos-D22 | PR365                     | NGCS01000003.1 | 395  |
| type-II | 13BJ                  | nos-D22 | NBRC 110496               | BBTF01000002.1 | 200  |
| type-II | <i>A. pittii</i>      | pit-D6  | PHEA-2                    | NC_016603.1    | 1164 |
| type-II | <i>A. pittii</i>      | pit-D20 | Acinetobacter sp. 1542444 | JEYA01000001.1 | 675  |
| type-II | <i>A.baylyi</i>       | bay-D15 | Acinetobacter ADP1        | NC_005966.1    | 1185 |

## Supplementary file 2 CDI islands

### a) Type-I *cdi* islands

|                        |                          | flanking orf               | <i>cdi</i> B               | <i>cdi</i> A | <i>cdi</i> I | flanking orf      |                |       |      |
|------------------------|--------------------------|----------------------------|----------------------------|--------------|--------------|-------------------|----------------|-------|------|
| <i>A. baumannii</i>    | WC-348                   | 1316                       | 1317                       | 1318-19      | 1320         | 1321 1322         | 1323           |       |      |
|                        | BJAB0715                 | 1274                       | 1275                       | 1276-78      | -            | 1282 1283         | 1284           |       |      |
|                        | <i>A. pittii</i>         | IEC338                     | 7795                       | 7800         | 7805         | 7810              | 7815 7820      | 7825  |      |
|                        | <i>A. pittii</i>         | PR320                      | -                          | 19125        | 19130        | 19135             |                | 19140 |      |
|                        | <i>A. pittii</i>         | ABUH540                    | 13600                      | 13605        | 13610        | 13615             |                | 13620 |      |
| <i>A. baumannii</i>    | ACICU (reference genome) | 1137                       | empty site                 |              |              |                   | 1138           |       |      |
| <i>A. baumannii</i>    | NCTC7364                 | 1427                       | 1428                       | 1429         | 1430         | 1431 1432         | 1434           |       |      |
|                        | <i>A. pittii</i>         | ABBL098                    | -                          | 11410        | 11405        | 11415             | 11420 11425    | 11430 |      |
|                        | <i>A. baumannii</i>      | NIPH146                    | 1824                       | 1825         | 1826         | 1827              |                | 1828  |      |
|                        | <i>A. pittii</i>         | ATCC1904                   | 2275                       | 2270         | 2265         | 2260              | 2255           | 2250  |      |
|                        | <i>A. baumannii</i>      | 19606                      | 2522                       | 2521         | 2520         | 2519              | 2518           | 2517  |      |
|                        | <i>A. pittii</i>         | IEC338                     | 8930                       | 8935         | 8940         | 8945              | 8950           | 8965  |      |
|                        | <i>A. baumannii</i>      | AB031                      | 8525                       | 8530         | 8535         | 8540              | 8545 8550      | TPase |      |
| <i>A. baumannii</i>    | ACICU (reference genome) | 1272                       | alternative genomic island |              |              |                   | 1277           |       |      |
| <i>A. baumannii</i>    | ab736                    | 8290                       | 8295                       | 8300         | 8305         |                   | 8310           |       |      |
|                        | <i>A. baumannii</i>      | ACICU                      | 1913                       | 1912         | 1911         | 1910              |                | 1908  |      |
|                        | <i>A. baumannii</i>      | ZW85-1                     | 7825                       | 7830-35      | 7840         | 7845              |                | 7850  |      |
|                        | <i>A. nosocomialis</i>   | <i>A. sp.</i> FDAARGOS_131 | 14385                      | 14390        | 14395        | 14400             |                | 14405 |      |
| <i>A. nosocomialis</i> | SSA3                     | 8550                       | 8545                       | 8540         | 8535         |                   | 8530           |       |      |
| <i>A. pittii</i>       | ARLG1803                 | 18850                      | 18855                      | 18860        | 18865        | 18870 18875 18880 | 18885          | 18890 |      |
|                        | <i>A. pittii</i>         | PHEA-2                     | 1272                       | 1269         | 1268         | 1267              | 1266 1265 1264 | 1263  | 1262 |
|                        | <i>A. calcoaceticus</i>  | ANCC3680                   | 2410                       | 2411         | 2412         | 2413              | 2414 2415 2416 | 2417  | 2418 |
|                        | <i>A. baumannii</i>      | UH19608                    | 833                        | 834          | 835          | 836               | 838-37 840     | -     | 839  |
| <i>A. baumannii</i>    | ACICU (reference genome) | 1891                       | empty site                 |              |              |                   | 1890           |       |      |

### b) Type-II *cdi* islands

|                     |                          | flanking orf | <i>cdi</i> B | <i>cdi</i> A | <i>cdi</i> I | flanking orfs       |
|---------------------|--------------------------|--------------|--------------|--------------|--------------|---------------------|
| <i>A. baumannii</i> | ACICU (reference genome) | 2441         | empty site   |              |              | 2440 2439 2438 2437 |

### c) Capture of flanking DNA

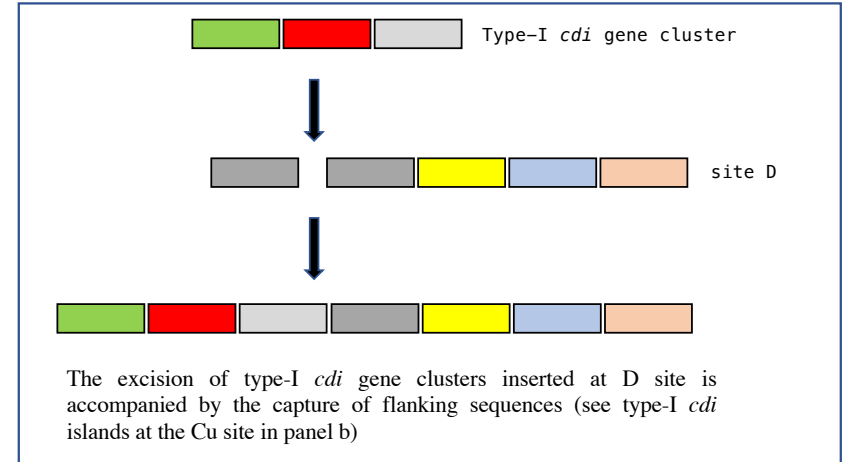

### d) Target site duplications (TSD) induced by type-II *cdi* islands

```

TATTGAAATA AAAAAGCTCCACAAA-AGGAGCTTTT target TTAGAATCTT
TATTGAAAT- AAAAAGCTCCACAAA-AGGAGCTTTT bau-D1 AAAAAGTCCCCTAACAGGAGCTTTT TT-GAATCTT
TATTGAAAT- AAAAAGCTCCACAAA-AGGAGCTTTT bau-D9 AAAAAGTCCATAAAA-AGGAGCTTTT TTAGAATCTT
TATCGAAATA AAAAAGCTCCACAAA-AGGAGCTTTT bau-D3 AAAAAGTCCCCTAACAGGAGCTTTT TT-GAATCTT
TATTGAAAT- AAAAAGCTCCACAAA-AGGAGCTTTT bau-D6 AAAAAGTCCCCTAACAGGAGCTTTT TTAGAATCTT
  
```

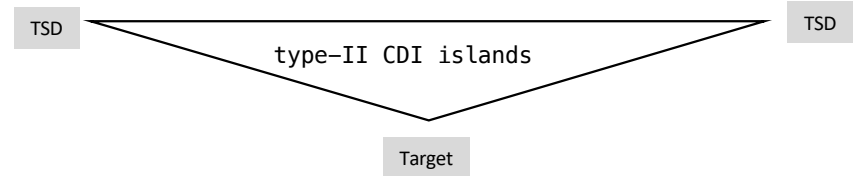

Duplications at the ends of type-II *cdi* islands found in the *A. baumannii* strains AB030 (bau-D1), IOMTU 433 (bau-D9), 781407 (bau-D6) and 1035119 (bau-D6). The empty target site is from in the *A. baumannii* strain ACICU.



pit-B5 GNYDFSTSYS RYQYEQ-NVL GANG-VLRYP GLSQQGNLNV SRVLSRSQGH KTSLYGKLYH KQNSNFIDDI EIEVQRKRTS GWNAGIQHRQ YLGDVAULDAG  
pit-B7 GNYDFSTSYS RYQYEQ-NVL GANG-VLRYP GLSQQGNLNV SRVLSRSQGH KTSIYGKLYH KQNSNFIDDI EIEVQRKRTS GWNAGIQHRQ YLGDVAULDAG

401

500

bau-A1 IDYRRGMGV- GARTAPEENI TDVYGNHLPV EGYSRAPLWS ADLRFITPFL LLDKPAQYRF NWRGOYAPKI LVPNDRFYIG GRYSVRGFDG ELMLSGDNGQ  
bau-C1 IDYRRGMGV- GARTAPEENI TDVYGNHLPV EGYSRAPLWS ADLRYITPFL LLDKPAQYRL NWRGOYAPKI LVPNDRFYIG GRYSVRGFDG ELMLSGDNGQ  
pit-A4 IDYRRGMGV- GARTAPEENI TDVYGNHLPV EGYSRAPLWS ADLRYITPFL LLEKPAQYRL NWRGOYAPKI LVPNDRFYIG GRYSVRGFDG ELMLSGDNGQ  
pit-C5 IDYRRGMGV- GARTAPEENI TDVYGNHLPV EGYSRAPLWS ADLRYITPFL LLEKPAQYRL NWRGOYAPKI LVPNDRFYIG GRYSVRGFDG ELMLSGDNGQ  
pit-C6 IDYRRGMGV- GARTAPEENI TDVYGNHLPV EGYSRAPLWS ADLRYITPFL LLEKPAQYRL NWRGOYAPKI LVPNDRFYIG GRYSVRGFDG ELMLSGDNGQ  
pit-A5 IDYRRGMGV- GARTAPEENI TDVYGNHLPV EGYSRAPLWS ADLRYITPFL LLEKPAQYRL NWRGOYAPKI LVPNDRFYIG GRYSVRGFDG ELMLSGDNGQ  
bau-C3 IDYRRGMGV- GARTAPEENI TDVYGNHLPV EGYSRAPLWS ADLRFSTPFL LLEKPAQYRL NWRGOYAPKI LVPNDRFYIG GRYSVRGFDG ELMLSGDNGQ  
cal-C10 IDYRRGMGL- GARTAAEENI IDVNGNHLVP EGYSRAPLWS ADLRYITPFL LLEKPAQYRL NWRGOYAPKI LVPNDRFYIG GRYSVRGFDG ELMLSGDNGQ  
bau-A2 IDYRRGMGV- EARTAPEENI TDVYGNHLPV EGYSRAPLWS ADLRFITPFL LLDKPAQYRF NWRGOYAPKI LVPNDRFYIG GRYSVRGFDG ELMLSGDNGQ  
bau-C4 IDYRRGMGV- EARTAAEENI IDVNGNHLVP EGYSRAPLWS ADLRFITPFL LLDKPAQYRF NWRGOYAPKI LVPNDRFYIG GRYSVRGFDG ELMLSGDNGQ  
bau-C2 IDYRRGMGV- GARTAPEENI TDVYGNHLPV EGYSRAPLWS ADLRYITPFL LLDKPAQYRL NWRGOYAPKI LVPNDRFYIG GRYSVRGFDG ELMLSGDNGQ  
pit-C7 IDYRRGMGI- NALTAPEENI TDVYGNHLPV EGYSRAPLWS ADLRFITPFL LLEKPAQYRL NWRGOYASKI LVPNDRFYIG GRYSVRGFDG ELMLSGDNGQ  
nos-C8 IDYRRGMGV- GARTAPEENI TDVYGNHLPV EGYSRAPLWS ADLRFITPFL LLDKPAQYRL NWRGOYAPKI LVPNDRFYIG GRYSVRGFDG ELMLSGDNGQ  
pit-A3 IDYRRGMGV- EARTAAEENI IDVNGNHLVP EGYSRAPLWS ADLRFITPFL LLEKPAQYRL NWRGOYAPKI LVPNDRFYIG GRYSVRGFDG ELMLSGDNGQ  
pit-B6 IDYRRGMGV- EARTAAEENI IDVNGNHLVP EGYSRAPLWS ADLRFITPFL LLEKPAQYRL NWRGOYAPKI LVPNDRFYIG GRYSVRGFDG ELMLSGDNGQ  
cal-C11 IDYRRGVGV- GARTAAEENI TDVYGNHLPV EGYSRAPLWS ADLRFITPFL LLEKPAQYRL NWRGOYAPKI LVPNDRFYIG GRYSVRGFDG ELMLSGDNGQ  
nos-C9 IDYRRGMGI- NALTAPEENI TDVYGNHLPV EGYSRAPLWS ADLRFITPFL LLEKPAQYRL NWRGOYASKI LVPNDRFYIG GRYSVRGFDG ELMLSGDNGQ  
bau-B1 LDYRHGTGAF DALLAPEEQI KDIDKNPLPS EGYSRAPLWS ADLRFQMPFL LLDTPAQYRL NWRGOYAPRV LVPNDRFYIG GRYSVRGFDG ELMLSGDNGQ  
bau-B4 LDYRHGTGAF DALLAPEEQI KDIDKNPLPS EGYSRAPLWS ADLRFQMPFL LLDTPAQYRL NWRGOYAPRV LVPNDRFYIG GRYSVRGFDG ELMLSGDNGQ  
bau-B2 LDYRHGTGAF DALLAPEEQI KDVDKNPLPP EGYSRAPLWS ADLRFQMPFQ LLDTPAQYRL NWRGOYAPRV LVPNDRFYIG GRYSVRGFDG ELMLSGDNGQ  
bau-B3 LDYRHGTGAF DALLAPEEQI KDVDKNPLPP EGYSRAPLWS ADLRFQMPFQ LLVTPAQYRL NWRGOYAPRV LVPNDRFYIG GRYSVRGFDG ELMLSGDNGQ  
pit-B5 LDYRHGTGAF DALLAPEEQI KDIDKNPLPS EGYSRAPLWS ADLRFQMPFL LLDTPAQYRL NWRGOYAPRV LVPNDRFYIG GRYSVRGFDG ELMLSGDNGQ  
pit-B7 LDYRHGTGAF DALLAPEEQI KDIDKNPLPS EGYSRAPLWS ADLRFQMPFL LLDTPAQYRL NWRGOYAPRV LVPNDRFYIG GRYSVRGFDG ELMLSGDNGQ

501

582

bau-A1 YLQOEISLNA IPINTQFYMA VDOGWVNGRN SIPGORYLLG SVLGLRTYQN SFYLDFTGR GLIAPDSIKK DWITGFSINL SY  
bau-C1 YLQOEISLNA IPINTQFYMA VDOGWVNGRN SIPGORYLLG SVLGLRTYQN SFYLDFTGR GLIAPDSIKK DWITGFSINL SY  
pit-A4 YLQOEISLNA IPINTQFYMA VDOGWVNGRN SIPGORYLLG SVLGLRTYQN SFYLDFTGR GLIAPDSIKK DWITGFSINL SY  
pit-C5 YLQOEISLNA IPINTQFYMA VDOGWVNGRN SIPGORYLLG SVLGLRTYQN SFYLDFTGR GLIAPDSIKK DWITGFSINL SY  
pit-C6 YLQOEISLNA IPINTQFYMA VDOGWVNGRN SIPGORYLLG SVLGLRTYQN SFYLDFTGR GLIAPDSIKK DWITGFSINL SY  
pit-A5 YLQOEISLNA IPINTQFYMA IDQGWVNGRN SIPGORYLLG SVLGLRTYQN SFYLDFTGR GLIAPDSIKK DWITGFSINL SY  
bau-C3 YLQOEISLNA IPINTQFYMA VDOGWVNGRN SIPGORYLLG SVLGLRTYQN SFYLDFTGR GLIAPDSIKK DWITGFSINL SY  
cal-C10 YLQOEISLNA IPINTQFYMA VDOGWVNGRN SIPGORYLLG SVLGLRTYQN SFYLDFTGR GLIAPDSIKK DWITGFSINL SY  
bau-A2 YLQOEISLNA IPINTQFYMA VDOGWVNGRN SIPGORYLLG SVLGLRTYQN SFYLDFTGR GLIAPDSIKK DWITGFSINL SY  
bau-C4 YLQOEISLNA IPINTQFYMA VDOGWVNGRN SIPGORYLLG SVLGLRTYQN SFYLDFTGR GLIAPDSIKK DWITGFSINL SY  
bau-C2 YVQOEISLNA IPINTQFYMA VDOGWVNGRN SIPGORYLLG SVLGLRTYQN SFYLDFTGR GLIAPDSIKK DWITGFSINL SY  
pit-C7 YLQOEISLNV IPINTQFYMA VDOGWVNGRN SIPGORYLLG SVLGLRTYQN SFYLDFTGR GLIAPDSIKK DWITGFSINL SY  
nos-C8 YLQOEISLNA IPINTQFYMA VDOGWVNGRN SIPGORYLLG SVLGLRTYQN SFYLDFTGR GLIAPDSIKK DWITGFSINL SY  
pit-A3 YVQOEISLNA IPINTQFYMA VDOGWVNGRN SIPGORYLLG SVLGLRAYQN SFYLDFTGR GLIAPDSIKK DWITGFSINL SY  
pit-B6 YVQOEISLNA IPINTQFYMA VDOGWVNGRN SIPGORYLLG SVLGLRAYQN SFYLDFTGR GLIAPDSIKK DWITGFSINL SY  
cal-C11 YVQOEISLNA IPINTQFYIA VDOGWVNGRN SIPGORYLLG SVLGLRTYQN SFYLDFTGR GLIAPDSIKK DWITGFSINL SY  
nos-C9 YLQOEISLNT PMPNTQFYMA VDOGWVNGRN SIPGORYLLG SVLGLRTYQN SFYLDFTGR GLIAPDSIKK DWITGFSINL SY  
bau-B1 YLQOEISVNT QIPNTQFYMA VDOGWVNGEN SIAGQRHLMG SVVGLRSYLN HFYIDFTGR GLIAPDSIKK DWIFGFSLNA FY  
bau-B4 YLQOEISVNT QIPNTQFYMA VDOGWVNGEN SIAGQRHLMG SVVGLRSYLN HFYIDFTGR GLIAPDSIKK DWIFGFSLNA FY  
bau-B2 YLQOEISVNT QIPNTQFYMA VDOGWVNGEN SIAGQRHLMG SVVGLRSYLN HFYIDFTGR GLIAPDSIKK DWIFGFSLNA FY  
bau-B3 YLQOEISVNT QIPNTQFYMA VDOGWVNGEN SIAGQRHLMG SVVGLRSYLN HFYIDFTGR GLIAPDSIKK DWIFGFSLNA FY  
pit-B5 YLQOEISVNT QIPNTQFYMA VDOGWVNGEN SIAGQRHLMG SVVGLRSYLN HFYIDFTGR GLIAPDSIKK DWIFGFSLNA FY  
pit-B7 YLQOEISLNT KIPNTQMYVA VDOGWVNGKN SIAGQRHLMG SVVGLRSYLN HFYIDFTGR GLIAPDSIKK DWIFGFSLNA FY





bau-A2 LAVDVKALGG MYANNIYLMG TEKGLGVTNA GTIQAVNNLV ITSAGKIEHS GTISSTSKTO GLVNIQTTGT GAASDINSSG SINSNSMLNI DSGNNLNVNA  
bau-A1 LAVDVKALGG MYANNIYLMG TEKGLGVTNA GTIQAVNNLV ITSAGKIEHS GTISSTNKTO GLVNIQTTGT GAAGDINSSG TISGKGVNVL DSANDLNITA  
pit-A3 LAVDVKALGG MYANNIYLMG TEKGLGVTNA GTIQAVNNLV ITSAGKIEHN GTISSTSKTO GLVNIQTTGT GVAGDINSSG TISGKGVNVL DSANDLNITA

401

cal-C10 G-INLNGGRI QSTAIKPPVPV IIEAKGDIK SERASISNLK LGSNMYLNAN NIELDNKSSI SSN-GANSVI AKNGIVLKNN SSITSIYDLD V-SAQKIDSS  
bau-C4 G-INLNGGRI QSTAIKPPVPV IIEAKGDIK SERASISNLK LGSNMYLNAN NIELENKSSI SSN-GANSVI AKNGIILKNN SSITSIYDLD V-SAQKIDSS  
pit-C5 KEIINNGSL ASS-----PL IVNAKGNINL AADTRIMDD QGGDVYIDAA NINLAAGSEL KSNRGTATIQ VQKDLVAAKG AKLIAAKDLN VLSNGKLSLT  
bau-C3 KEIINNGSL ASS-----PL MINTKGNLNL AANSRIFNDA QSGDVYIDAA NINLAANAGI TSNRGTASIQ VQKDLVAAKG AKLIAAKDLN VLSNGKLSLT  
cal-C11 KEIINNGSL ASS-----PL IVNTKGNINL AADTRIMDD QGGDVYIDAA NINLAAGSEL KSNRGTATIQ VQKDLVAAKG AKLIAAQDLN VLSNGKLSLT  
pit-C7 KEIINNGSL ASS-----PL IVNAKGNINL AADTRIMDD QGGDVYIDAA NINLAAGSEL KSNRGTATIQ VQKDLVAAKG AKLIAAKDLN VLSNGKLSLT  
bau-C1 KEIINNGSL ASS-----PL MINTKGNLNL AANSRIFNDA QSGDVYIDAA NINLAANAGI TSNRGTASIQ VQKDLVAAKG AKLIAAKDLN VLSNGKLSLT  
pit-A4 KEIINNGSL ASS-----PL IVNAKGNINL AADTRIMDD QGGDVYIDAA NINLAAGSEL KSNRGTATIQ VQKDLVAAKG AKLIAAKDLN VLSNGKLSLT  
pit-A5 KEIINNGSL ASS-----PL IVNTKGNINL AADTRIMDD QGGDVYIDAA NINLAAGSEL KSNRGTATIQ VQKDLVAAKG AKLIAAKDLN VLSNGKLSLT  
pit-C6 KEIINNGSL ASS-----PL IVNAKGNINL AADTRIMDD QGGDVYIDAA NINLAAGSEL KSNRGTATIQ VQKDLVAAKG AKLIAAKDLN VLSNGKLSLT  
bau-C2 KEIINNGSL ASS-----PL IVNAKGNINL AADTRIMDD QGGDVYIDAA NINLAAGSEL KSNRGTATIQ VQKDLVAAKG AKLIAAKDLN VLSNGKLSLT  
nos-C8 KEIINNGSL ASS-----PL IVNAKGNINL AADTRIMDD QGGDVYIDAA NINLAAGSEL KSNRGTASIQ VQKDLVAAKG AKLIAAQDLN VLSNGKLSLT  
pit-B7 KEIINNGSL ASS-----PL IISKGNLNL AANSRIFNDA QSGELYVDA NINLATNAGI TSNRGSAYIQ SQKDVVAAQG AKLIAAQDLN VSGGKLSLT  
bau-B4 KEIINNGSL ASS-----PL IISKGNLNL AANSRIFNDA QSGELYVDA NINLATNAGI TSNRGSAYIQ SQKDVVTEQG SQKDVVAAQG VSGRGLSLN  
nos-C9 ARIEKHGADN KNI-----V SLSAKNDINI KNSANIQFNG EGGDYLDA NINLGNVNL GVN-GAISLQ AKQNLQGDV RNISSMYDLN LYAGNLLSFP  
bau-B1 KEIINNGSL ASS-----PL IINTKGNLNL AANSRIFNDA QSGELYVDA NINLATNAGI TSNRGSAYIQ SQKDVVAAQG AKLIAAQDLN VSGRGLSLN  
pit-B5 KEIINNGSL ASS-----PL IISKGNLNL AANSRIFNDA QSGDVYIDAA NINLATNAGI TSNRGSAYIQ SQKDVVAAQG AKLIAAQDLN VSGGKLSLT  
bau-B3 KEIINNGSL ASS-----PL IISKGNLNL AANSRIFNDA QSGDVYIDAA NINLATNAGI TSNRGSAYIQ SQKDVVAAQG AKLIAAQDLN VSGGKLSLT  
bau-B2 GKIDKLGTTL SS-----I FLSAKGDVSL QNDVNIQWAG VGGGIYSDSL NFNLGKDSNI LSQ-GDISLL ANNNIDIQNG KGITSNNDLS IQSKNNLNIA  
pit-B6 GKIDKLGTTL SS-----I FLSAKGDVSL QNGVNVQVNG VGGGIYSDSL NFNLGKDSNI LSQ-GDISLL ANNNIDIQNG KGITSNNDLS IQSKNNLNIA  
bau-A1 KEVKIDEGN-NT-----AL ILAANGNINL AANTRIMDD QGGDVYIDAA NINLAAGSEL KSNRGTATIQ VQKDLVAAKG AKLIAAQDLN VLSNGKLSLT  
pit-A3 KEVKIDEGN-NT-----AL ILAANGNINL KNEIQLKNSA VGGIYLNAN NINLE-GNAT VDGKADVNIW GKESLILKKN NKIKSGKSIIS ILGGG-LSLE

500

501

cal-C10 YSSLVANKGN INIVGSSDDR TLGNIDLLET ILNAEGDVSL YSSGNLTKK LDITTLNDGN SKIKNFMYK KNNL-LWDYL TKAPPQFVKG IQAEAGGKLT  
bau-C4 YSSLVANKGN INIVGSSDDR NLGNINLSET ILNAVGNVSL YSSGNLTKK LDITTLNDGN SKIKNFMYK KNNL-LWDYL TKAPPQFVKG IQAEAGKLT  
pit-C5 ENHIOASLGS INLQANSANT Q-NLIDLQGG TIYAGKDLNL YSSGDLNLKN LGFS-LENAA TRVKNIKAYS GRDL-VWVNA QALDAANLITL VQLDAANLITL  
bau-C3 ENHIOASLGS INLQANSANT Q-NLIDLQGG TIYAGKDLNL YSSGDLNLKN LGFS-LENAA TRVKNIKAYS GRDL-VWVNA QALDAANLITL VQLDAANLITL  
cal-C11 ENHIOASLGS INLQANSANT Q-NLIDLQGG TIYAGKDLNL YSSGDLNLKN LGFS-LENAA TRVKNIKAYS GRDL-VWVNA QALDAANLITL VQLDAANLITL  
pit-C7 ENHIOASLGS INLQANSANT Q-NLIDLQGG TIYAGKDLNL YSSGDLNLKN LGFS-LENAA TRVKNIKAYS GRDL-VWVNA QALDAANLITL VQLDAANLITL  
bau-C1 ENHIOASLGS INLQANSANT Q-NLIDLQGG TIYAGKDLNL YSSGDLNLKN LGFS-LENAA TRVKNIKAYS GRDL-VWVNA QALDAANLITL VQLDAANLITL  
pit-A4 ENHIOASLGS INLQANSANT Q-NLIDLQGG TIYAGKDLNL YSSGDLNLKN LGFS-LENAA TRVKNIKAYS GRDL-VWVNA QALDAANLITL VQLDAANLITL  
pit-A5 ENHIOASLGS INLQANSANT Q-NLIDLQGG TIYAGKDLNL YSSGDLNLKN LGFS-LENAA TRVKNIKAYS GRDL-VWVNA QALDAANLITL VQLDAANLITL  
pit-C6 ENHIOASLGS INLQANSANT Q-NLIDLQGG TIYAGKDLNL YSSGDLNLKN LGFS-LENAA TRVKNIKAYS GRDL-VWVNA QALDAANLITL VQLDAANLITL  
nos-C8 ENHIOASLGS INLQANSANT Q-NLIDLQGG TIYAGKDLNL YSSGDLNLKN LGFS-LENAA TRVKNIKAYS GRDL-VWVNA QALDAANLITL VQLDAANLITL  
pit-B7 ENHIOASLGS INLQANSANT Q-NLIDLQGG TIYAGKDLNL YSSGDLNLKN LGFS-LENAA TRVKNIKAYS GRDL-VWVNA QALDAANLITL VQLDAANLITL  
bau-B4 GNOIQASLGS INLQANSANT Q-NLIDLQGG TIYAGKDLNL YSSGDLNLKN LGFS-LENAA TRVKNIKAYS GRDL-VWVNA QALDAANLITL VQLDAANLITL  
pit-A5 ENHIOASLGS INLQANSANT Q-NLIDLQGG TIYAGKDLNL YSSGDLNLKN LGFS-LENAA TRVKNIKAYS GRDL-VWVNA QALDAANLITL VQLDAANLITL  
pit-A6 ENHIOASLGS INLQANSANT Q-NLIDLQGG TIYAGKDLNL YSSGDLNLKN LGFS-LENAA TRVKNIKAYS GRDL-VWVNA QALDAANLITL VQLDAANLITL  
bau-C2 ENHIOASLGS INLQANSANT Q-NLIDLQGG TIYAGKDLNL YSSGDLNLKN LGFS-LENAA TRVKNIKAYS GRDL-VWVNA QALDAANLITL VQLDAANLITL  
nos-C8 ENHIOASLGS INLQANSANT Q-NLIDLQGG TIYAGKDLNL YSSGDLNLKN LGFS-LENAA TRVKNIKAYS GRDL-VWVNA QALDAANLITL VQLDAANLITL  
pit-B7 GNOIQASLGS INLQANSANT Q-NLIDLQGG TIYAGKDLNL YSSGDLNLKN LGFS-LENAA TRVKNIKAYS GRDL-VWVNA QALDAANLITL VQLDAANLITL  
bau-B4 GNOIQASLGS INLQANSANT Q-NLIDLQGG TIYAGKDLNL YSSGDLNLKN LGFS-LENAA TRVKNIKAYS GRDL-VWVNA QALDAANLITL VQLDAANLITL  
pit-A5 ENHIOASLGS INLQANSANT Q-NLIDLQGG TIYAGKDLNL YSSGDLNLKN LGFS-LENAA TRVKNIKAYS GRDL-VWVNA QALDAANLITL VQLDAANLITL  
pit-A6 ENHIOASLGS INLQANSANT Q-NLIDLQGG TIYAGKDLNL YSSGDLNLKN LGFS-LENAA TRVKNIKAYS GRDL-VWVNA QALDAANLITL VQLDAANLITL  
nos-C9 ENHIOASLGS INLQANSANT Q-NLIDLQGG TIYAGKDLNL YSSGDLNLKN LGFS-LENAA TRVKNIKAYS GRDL-VWVNA QALDAANLITL VQLDAANLITL  
pit-B5 ENHIOASLGS INLQANSANT Q-NLIDLQGG TIYAGKDLNL YSSGDLNLKN LGFS-LENAA TRVKNIKAYS GRDL-VWVNA QALDAANLITL VQLDAANLITL  
bau-B3 ENHIOASLGS INLQANSANT Q-NLIDLQGG TIYAGKDLNL YSSGDLNLKN LGFS-LENAA TRVKNIKAYS GRDL-VWVNA QALDAANLITL VQLDAANLITL  
pit-B6 NSSIESKAGN VNL-ISLGNL ASSLLGINNT KLYAGKDFNI KGAKNIKLS -----SIVQ ENSNINLYA GNDIEIGNDV SPVSLKTQGT INIAAKNNLI  
bau-B2 NSSIESKAGN VNL-ISLGNL ASSLLGINNT KLYAGKDFNI KGAKNIKLS -----SIVQ ENSNINLYA GNDIEIGNDV SPVSLKTQGT INIAAKNNLI  
bau-A2 ENHIOASLGT INLQANSANT Q-NLIDLQGG TIYAGKDLNL YSTDINIKK LDFS-ENKNN NRKKNINIIY GGSGL-YWDNT AFLIPDLTGG ISLRAEKDLT  
bau-A1 GSELTSGQN- VNLQNSVNIK K-L-LIN--DS VIKAEEDYNF YSNGDLSINK IDFS-QSKDN LKQONIKVGS GGIL-DLGDN FTFNKSGGGA FESKSNINLG  
pit-A3 GSELTSGQN- INLQSTGVNK K-L-LIN--DS IKAENYNYF YSHEDLSINK IDFS-QNKDN LRKQNIKIGS GGIL-ELGDN FTFNKSGGAN FESKSNINLG

600

601

cal-C10 LSGKLIADL GIDLQASQLN LDELDLSDQK INITSKDDL ILEKNLNAQN DINLTALGG VTANSLKATS SAGKISILAN KVNVLNSTQT TKAMPSADK  
bau-C4 LSGKLIADL GIDLQASQLN LDELDLSDQK INITSKDDL ILEKNLNAQN DINLTALGG VTANSLKATS SAGKISILAN KVNVLNSTQT TKAMPSADK  
pit-C5 VTAKESNKD SIQHLANQIA LNSALTSQKN IDVSSEIADL VLSQALKAQG DINLTALAGG VTANSLKATS SAGEISILAN KNISLNSTQT TKAMPSADK  
bau-C3 VTAKESNKD SIQHLANQIA LNSALTSQKN IDVSSEIADL VLSQALKAQG DINLTALAGG VTANSLKATS SAGKISILAN KNINLNSTQT TKAMPSADK  
cal-C11 VTAKESNKD SIQHLANQIA LNSALTSQKN IDVSSEIADL VLSQALKAQG DINLTALAGG VTANSLKATS SAGKISILAN KNINLNSTQT SKAMPSADK  
pit-C7 VTAKESNKD SIQHLANQIA LNSALTSQKN IDVSSEIADL VLSQALKAQG DINLTALAGG VTANSLKATS SAGKISILAN KNISLNSTQT TKAMPSADK  
bau-C1 VTAKESNKD SIQHLANQIA LNSALTSQKN IDVSSEIADL VLSQALKAQG DINLTALAGG VTANSLKATS SAGKISILAN KNINLNSTQT SKAMPSADK  
pit-A4 VTAKESNKD SIQHLANQIA LNSALTSQKN IDVSSEIADL VLSQALKAQG DINLTALAGG VTANSLKATS SAGEISILAN KNISLNSTQT TKAMPSADK  
pit-A5 VTAKESNKD SIQHLANQIA LNSALTSQKN IDVSSEIADL VLSQALKAQG DINLTALAGG VTANSLKATS SAGKISILAN KNINLNSTQT SKAMPSADK  
pit-C6 VTAKESNKD SIQHLANQIA LNSALTSQKN IDVSSEIADL VLSQALKAQG DINLTALAGG VTANSLKATS SAGKISILAN KNINLNSTQT SKAMPSADK  
bau-C2 VTAKESNKD SIQHLANQIA LNSALTSQKN IDVSSEIADL VLSQALKAQG DINLTALAGG VTANSLKATS SAGKISILAN KNINLNSTQT SKAMPSADK  
nos-C8 VTAKESNKD SIQHLANQIA LNSALTSQKN IDVSSEIADL VLSQALKAQG DINLTALAGG VAANSLKATS SAGKISILAN KNINLNSTQT SKAVPATDK  
pit-B7 LSTATLSSKD SIQLOQAQLT LNSGLTSLNN ISLTAESIADL VLSNVAQON NIDVSLTGS ITTNLQATS TGGKISLLAK KDLINSVQHT --VLPKWPDT  
bau-B4 LSSQGFSSKG GIQLOADQLS LSTALTSQNN ISLTAESIADL VLDNALTAQN DINVTALAGN LKTFSLKANS IAGKISILAN KVNLSSTIQH --FDSMAYD  
nos-C9 LKGSGLSSTG DLKLOAKALN IGTDLNAGKN LSLNATQSDL NLNKLTAQON NIDVSLTGS ITATGLNATS LQKLSILGA KDTLFTMAGT T-----  
bau-B1 LSSQGFSSKG GIQLOADQLT LNTALTSQNN ISLTAESIADL LNTALTAQON DINVTALAGN LKTFSLKANS IAGKISILAN KVNLSSTIQH FDSM--ASYD  
pit-B5 ISAQGVSSKD SIQLOQAQLT LNTNFTSQKD INLITETDDL FLNVLNLAQN DINISALTGG ITANSLKANS NAGKISILAN KNINLNSLQE IESAPWADQ  
bau-B3 ISAQGVSSKD SIQLOQAQLT LNTNFTSQKD INLITETDDL FLNVLNLAQN DINISALTGG ITANSLKANS NAGKISILAN KNINLNSLQE IESAPWADQ  
bau-B2 LRT-----DTSLLTKKD IDVQTDI-----GN LYAKSLNVSS SEGVSYILGN GNVWFET-----QND  
pit-B6 LRT-----DTSLLTKKD IDVQTDI-----GN LYAKSLNVSS SEGVSYILGN GNVWFET-----QND  
bau-A2 ILGQ-----GGLSA DNGISLYGNN VNVSSLNLS NIIGNTLVFAN NNIDIKGVNI KSNNGNLNFS  
bau-A1 EGLK-----LNLDD DTSFISTGSD IKANTLNLTS NVGGVYFKSN GDININSKIT EKKVLSKGV  
pit-A3 EGLK-----LNLDE DIGVSTGGD IKANTLNLTS NLGSVYFKSN GNIKIDSKIT NKKYSDSIFG

700

701

cal-C10 ELTTDQSVIS G--LKGVTLG SIGDGTVN-L QSVQVNASQG DILVSSNNGI NLKANSDVSV KGDGTGTQIV N-NVLKQGTV SVENSKSDIK IONTDLGSTV  
bau-C4 ELTTDQSVIS G--LKGVTLG SIGDGTVN-L QSVQVNASQG DILVSSNNGI NLKANSDVSV KGDGTGTQIV N-NVLKQGTV SVENSKSDIK IONTDLGSTV  
pit-C5 ELTTDQSVIS G--LKGVTLG SIGDGTVN-L QSVQVNASQG DILVSSNNGI NLKANSDVSV TGDTRGFKT V N-NVLKQGTV SIENSKSDIK IONTDLSSTV  
bau-C3 ELTTDQSVIS G--LKGVTLG SIGDGTVN-L QSVQVNASQG DILVSSNNGI NLKANSDVSV TGDTRGFKT V N-NVLKQGTV SIENSKSDIK IONTDLSSTV  
cal-C11 ELTTDQSVIS G--LKGVTLG SIGDGTVN-L QSVQVNASQG DILVSSNNGI NLKANSDVSV TGDTRGFKT V N-NVLKQGTV SIENSKSDIK IONTDLGSTV  
pit-C7 ELTTDQSVIS G--LKGVTLG SIGDGTVN-L QSVQVNASQG DILVSSNNGI NLKANSDVSV TGDTRGFKT V N-NVLKQGTV SIENSKSDIK IONTDLSSTV  
bau-C1 ELTTDQSVIS G--LKGVTLG SIGDGTVN-L QSVQVNASQG DILVSSNNGI NLKANSDVSV TGDTRGFKT V N-NVLKQGTV SIENSKSDIK IONTDLGSTV  
pit-A4 ELTTDQSVIS G--LKGVTLG SIGDGTVN-L QSVQVNASQG DILVSSNNGI NLKANSDVSV TGDTRGFKT V N-NVLKQGTV SIENSKSDIK IONTDLSSTV  
pit-A5 ELTTDQSVIS G--LKGVTLG SIGDGTVN-L QSVQVNASQG DILVSSNNGI NLKANSDVSV TANKGQVKT V N-NVLKQGTV SIENSKSDIK IONTDLGSTV  
pit-C6 ELTTDQSVIS G--LKGVTLG SIGDGTVN-L QSVQVNASQG DILVSSNNGI NLKANSDVSV TANKGQVKT V N-NVLKQGTV SIENSKSDIK VQNTDLGSTV  
bau-C2 ELTTDQSVIS G--LKGVTLG SIGDGTVN-L QSVQVNASQG DILVSSNNGI NLKANSDVSV TGDTRGFKT V N-NVLKQGTV SIENSKSDIK IONTDLSSTV  
nos-C8 ELTTDQSVIS G--LKGVTLG SIGDGTVN-L QSVQVNASQG DILVSSNNGI NLKANSDVSV TGNNGQFKT V N-NVLKQGTV SIENSKSDIK IONTDLSSTV  
pit-B7 ELTTDQSVIS G--QKIDLGG SIGDGTVN-L ISSGEGVSI IISGEGVSI DIQIISNGL NLPNYDVEV NADDWYERSI S-STLTAQNI GINNKGDKL TADTLTATF  
bau-B4 VITTKTNIN G--AKGVVIG STGEGALS-I SATDIMANQG DVQLISNGL KILANNDVSM HNDNNGRSVL SPPTITAQNI NINNKKNLNDV VDNGETSFAIA  
nos-C9 --NTVLK G--SKGVVIG TTGIIGDLT-V QNAILLESQSG NIVATSG-- -----GN LYAKSLNVSS SEGVSYILGN GNVWFET-----QND  
bau-B1 VITTKTNIN G--AKGVVIG STGEGALS-I SATDIMANQG DVQLISNGL KILANNDVSM HNDNNGRSVL SPPTITAQNI NINNKKNLNDV VDNGETSFAIA  
pit-B5 GATTDMTFIN G--NKGVTLG SIGDGNVQ-L KSTRITAEQG DIQLVAGNVI SLQANTDVIT --SGDSGYDNV RKNVLQGGSL QIQNKKADIV IDSTNLTTSV  
bau-B3 GATTDMTFIN G--NKGVTLG SIGDGNVQ-L KSTRITAEQG DIQLVAGNVI SLQANTDVIT --RGDHYDDI RKNVLQGGSL QIQNKKADIV IDSTNLTTSV  
bau-B2 GWYTLKRNIN A--KNGIILG SKGENAITKI NTVDLKSVDG NVLLLSGGDL TLDGNGYTT --TGMKAIV ASGFINAQDV TLWSKTGVLD ISSGVINASN  
pit-B6 GWYTLKRNIN A--KNGIILG SKGENAITKI NTVDLKSVDG NVLLLSGGDL TLDGNGYTT --TGMKAIV ASGFINAQDV TLWSKTGVLD ISSGVINASN

800

bau-A2 AENGYIKIAD SNLSSEKNKL FLISKDKQIF NNTSLLSG-G DLILNT---- -ISNKGDVIEI NQDGLFSSP IKSNNNGVVI DSKGMLNITT KDLNKFVDIS  
bau-A1 ETGQFNQEV ENYINAFNDI SIDSNIQVY NGANFKTNFG DFVVKG---- -KDLINIDVSK YGHTRFDYIM ----GQELY SYKNSNNKNN FEANNILFLV  
pit-A3 GGAYFDQEV ENYINSQKDL SYYSKNNIYI NGADFKNSG DILIGS---- -RSVDFDAYR YDSAR----L ----GGIL GKKN--NNTNR FDANNISILA

801

cal-C10 GKLAINSRAG MSTIIDSVLTK SKGNTELYAK DLLTLQGVNA TSDQHLAVSS GRTVYSNAEY TPAT---KWI ADKVTNLTSK GVTSVTATGN QVLQNTLGT  
bau-C4 GKLAINSRAG MSTIIDSVLTK SKGNTELYAK DLLTLQGVNA TSDQHLAVSS GRTVYSNAEY TPAT---KWI ANKVTNLTSK GVTSVTATGN QVLQNTLGT  
pit-C5 GKLAINSRAG MSTIIDSVLTK SKGNTELYAK DLLTLQGVNA TSDQHLAVSS GRTVYSNAEY TPAT---KWI ADKVTNLTSK GVTSVTATGN QVLQNTLGT  
bau-C3 GKLAINSRAG MSTIIDSVLTK SKGNTELYAK DLLTLQGVNA TSDQHLAVSS GRTVYSNAEY TPAT---KWI ADKVTNLTSK GVTSVTATGN QVLQNTLGT  
cal-C11 GKLAINSRAG MSTIIDSVLTK SKGNTELYAK DLLTLQGVNA TSDQHLAVSS GRTVYSNAEY TPAT---KWI ADKVTNLTSK GVTSVTATGN QVLQNTLGT  
pit-C7 GKLAINSRAG MSTIIDSVLTK SKGNTELYAK DLLTLQGVNA TSDQHLAVSS GRTVYSNAEY TPAT---KWI ADKVTNLTSK GVTSVTATGN QVLQNTLGT  
bau-C1 GKLAINSRAG MSTIIDSVLTK SKGNTELYAK DLLTLQGVNA TSDQHLAVSS GRTVYSNAEY TPAT---KWI ANKVTNLTSK GVTSVTATGN QVLQNTLGT  
pit-A4 GKLAINSRAG MSTIIDSVLTK SKGNTELYAK DLLTLQGVNA TSDQHLAVSS GRTVYSNAEY TPAT---KWI ADKVTNLTSK GVTSVTATGN QVLQNTLGT  
pit-A5 GKLAINSRAG MSTIIDSVLTK SKGNTELYAK DLLTLQGVNA TSDQHLAVSS GRTVYSNAEY TPAT---KWI ADKVTNLTSK GVTSVTATGN QVLQNTLGT  
bau-C2 GKLAINSRAG MSTIIDSVLTK SKGNTELYAK DLLTLQGVNA TSDQHLAVSS GRTVYSNAEY TPAT---KWI ADKVTNLTSK GVTSVTATGN QVLQNTLGT  
nos-C8 GKLAINSRAG MSTIIDSVLTK SKGNTELYAK DLLTLQGVNA TSDQHLAVSS GRTVYSNAEY TPAT---KWI ADKVTNLTSK GVTSVTATGN QVLQNTLGT  
pit-B7 GDLINSIE-G KSSIKAVSLN SKGNTELSAK DHLTMHAVA NADKHMALSS KKNIYLNMGY GSTTTPVILD SYSSVNLKAN GILSIASAG- HAAYRTNYTG  
bau-B4 NELKINSE-G KLNFKNSILN SKGNTEISSK DHLTLGAVTA NSDKHLALSS KKNIYINGEY GTTT---VMT PYVESNLTK GILSMTSGGS HAAQNTTTYTG  
nos-C9 -----A KNTLTDSTLT AKNNIEIFAT DDLLDQGVKS TSQOHTALNS KKNIYINS-H VNAVYVADFS STKSSLNST GVLSLVGGGS LNVQNTKLTG  
bau-B1 NELKINSE-G KLNFKNSILN SKGNTEISSK DHLTLGAVTA NSDKHLALSS KKNIYINGEY G---TTTVM PYVESNLTK GILSMTSGGS HAAQNTTTYTG  
pit-B5 GGLSINGE-G KTLTNSSELN SKGNTELSAK DHLTLQVNEA NADKHMALNS KKNIYLNSEQ GPTVTSTIWE SYSLVNLKAA GLLSLKSGS QALNSTSIGK  
bau-B3 GGLSINGE-G KTLTNSSELN SKGNTELSAK DHLTLQVNEA NADKHMALNS KKNIYFNISKY GSTATPVVMD SSSSVNLKAN GILSMV-GMD HIANQTTYTG  
bau-B2 GGISIRAG-N NAQVHDIIDL STKNIEINSD KDLILERTNT RANQHIALSS KGNINAYQNY I-----LDAK GVLSAISNGS IDGQGY--G  
pit-B6 GGISIRAG-N NAQVHDIIDL STKNIEINSD KDLILERTNT RANQHIALSS KGNINAYQNY I-----LDAK GVLSAISNGS IDGQGY--G  
bau-A2 GE----- KIEISSNMM KLDGINVYSN GNLSLHA--- DKDIYLVNTLV PNSWT-GGGF GSEIIRSQKH IS-SSKEGS VIGLENQAL NAPVGLKAN  
bau-A1 DN----- SLRAVSGKYI AKKNINLFSN GSFDFYVNDL NSNGHTNIQA KNKLNIRDGF NGKNFFDNQY ISGNNFKSD GLISILGSRV EVDGFLNAKG  
pit-A3 ED----- RLKTVAGNYN AKKNINLFSN GDVDFYGYI NSGGHTNIQA KNKLIIRGGI GGENFNPNKY ISGVNSFKSD GLILILGDSV ELDGFLNARG

901

cal-C10 GAVLLEAGGF IL--GQTGLN L-----NAV GSDLLKNDTK LNSLNGDLTI QTNLSLTIDP ---KVYSLK AVGDIELVSK TGTTLT--K GYEGTKNGGS  
bau-C4 GAVLLEAGGF IT--GQTGLN L-----NAV GSDLLKNDTK LNSLNGDLTI QTNLSLTIDP ---KVYSLK AVGDIELVSK AGTLTL--K GYEGAKNGGS  
pit-C5 GAVLLEAGGF IL--GQTGLN L-----NAV GSDLLKNDTK LNSLNGDLTI QTNLSLTIDP ---KVYSLK AVGDIELVSK NGTLTL--K GYGGTAGNGS  
bau-C3 GAVLLEAGGF IA--GQTGLN L-----NAV GSDLLKNDTK LNSLNGDLTI QTNLSLTIDP ---KVYSLK AVGDIELVSK TGTTLT--K GYEGAKNGGS  
cal-C11 GAVLLEAGGF IL--GQTGLN L-----NAV GSDLLKNDTK LNSLNGDLTI QTNLSLTIDP ---KAYSLK AVGDIELVSK NGTLTL--K GYGGTNGGS  
pit-C7 GAVLLEAGGF IL--GQTGLN L-----NAV GSDLLKNDTK LNSLNGDLTI QTNLSLTIDP ---KVYSLK AVGDIELVSK TGTTLT--K GYGGTNGGS  
bau-C1 GAVLLEAGGF IL--GQTGLN L-----NAV GSDLLKNDTK LNSLNGDLTI QTNLSLTIDP ---KVYSLK AVGDIELVSK TGTTLT--K GYGGTAGNGS  
pit-A4 GAVLLEAGGF IL--GQTGLN L-----NAV GSDLLKNDTK LNSLNGDLTI QTNLSLTIDP ---KVYSLK AVGDIELVSK NGTLTL--K GYGGTNGGS  
pit-A5 GAVLLEAGGF IL--GQTGLN L-----NAV GSDLLKNDTK LNSLNGDLTI QTNLSLTIDP ---KVYSLK AVGDIELVSK TGTTLT--K GYGGTNGGS  
pit-C6 GAVLLEAGGF IL--GQTGLN L-----NAV GSDLLKNDTK LNSLNGDLTI QTNLSLTIDP ---KVYSLK AVGDIELVSK TGTTLT--K GYGGTAGNGS  
bau-C2 GAVLLEAGGF IL--GQTGLN L-----NAV GSDLLKNDTK LNSLNGDLTI QTNLSLTIDP ---KAYSLK AVGDIELVSK TGTTLT--K GYGGTAGNGS  
nos-C8 GAVLLEAGGF IT--GQTGLN L-----NAV GSDLLKNDTK LNSLNGDLTI QTNLSLTIDP ---KAYNLK AVGDIELVSK AGTLTL--K GYGGTAGNGS  
pit-B7 GAVSLEANNL IS-PSDGLT F-----NTV DSTFLKNDPV LKDLNGDLTI QTNALTIIDP ---KIHKFN AIGDIELISK NGTLTL--K GYEGTAGNGS  
bau-B4 GAVLIEAGNV LTPPSNATL F-----NTV DSTFLKNDPV LKDLNGDLTI QTNALTIIDP ---KIHKFN AIGDIELISK NGTLTL--K GYEGTAGNGS  
nos-C9 GAVLIEGDAL NT--AKSVD L-----NAT GSDLLKNDTK LNSLNGDLTI QTNLSLTIDP ---KIHNLK AAGDIELISK NGTLTL--K GYEGTAGNGS  
pit-B5 GALSLEAGNV LTPPSNATL F-----NAV DSFAFLRSDPA LKDLNGDLTI QTNALTIIDP ---KIHTLN AKGDVQLISK NGALNL--N GYGGKNGGS  
bau-B1 GAINIETDGS FNINKDVLQN SARNIIFSNQE SDFKFLASDPQ LKIQIKNLSI QTNNTLVLDP ---EKIKIQ GDNNIELISK NGDLTL--L GYGGKNGGS  
bau-B3 GALSLEANNL IS-PSAGTL F-----NAM DSSVLTNDPA LKDLNGDLTI QTNALTIIDP ---KIHKLK AAGDIELISK NGTLTL--L GYGGTAGNGS  
bau-B2 GAVIVEANQL ---SNNID F-----RAT GSELLQLDTK LKNGINGLSI QLNKDFVIK THGHDTITLV AENDIDVRSK QGAIIRI--E GENFAPNLNE  
pit-B6 GAVIVEANQL ---SNNID F-----RAT GSELLQLDTK LKNGINGLSI QLNKDFVIK THGHDTITLV AENDIDVRSK QGAIIRI--E GENFAPNLNE  
bau-A2 GVISIKSKLD QS-YQNTSLN A-----GAITL HSD---AGSI NNSKFNRAIA NTTFFLES- ---SELK INGNLSLYAK KDQILDAINS QGRAFPPNYT  
bau-A1 GAILINSLFN YS-NSDGLH L-----FLTST KNDFFLENSL LKMHNGSIDI RSTGGVDFK- ---TNKIE AYGIDINLYSK GVTTLN-- KIIDFSKDDV  
pit-A3 GAILINSLFN YN-N--NGVN L-----ILTSS KSDFLEGISI LQKYNYSIDI LSKENLNF- ---WNNIK ADGIDINLYSK GGMVFN-- RGANYSGEEA

1001

cal-C10 EQVVKLDTAN GGINLEGAK- VDIQGSQLIA K-----KD IQVVS TKDDL LIDGVRNSFS NIKFPDKAN- REKIVQADFI QELNALKATQ EYLNQQAALK  
bau-C4 EQVVKLDTAN GGINLEGAK- VDIQGSQLIA K-----KD IQVVS TKDDL LIDGVRNSFS NIKFPDKAN- REKIVQADFI QELNALKATQ EYLNQQAALK  
pit-C5 EQVVKLDTAN GGINLEGAK- VDIQGSQLIA Q-----KD IKVSSKDDV LIDGVRNSFS NIKFPDKAN- REKIVQADFI QELNALKATQ EYLNQQAALK  
bau-C3 EQVVKLDTAN GGINLEGAK- VDIQGSQLIA Q-----KD IKVSSKDDV LIDGVRNSFS NIKFPDKAN- REKIVQADFI QELNALKATQ EYLNQQAALK  
cal-C11 EQVVKLDTAN GGINLEGAK- VDIQGSQLIA Q-----KD IKVSSKDDV LIDGVRNSFS NIKFPDKAN- REKIVQADFI QELNALKATQ EYLNQQAALK  
pit-C7 EQVVKLDTAN GGINLEGAK- VDIQGSQLIA Q-----KD IKVSSKDDV LIDGVRNSFS NIKFPDKAN- REKIVQADFI QELNALKATQ EYLNQQAALK  
bau-C1 EQVVKLDTAN GGINLEGAK- VDIQGSQLIA Q-----KD IKVSSKDDV LIDGVRNSFS NIKFPDKAN- REKIVQADFI QELNALKATQ EYLNQQAALK  
pit-A4 EQVVKLDTAN GGINLEGAK- VDIQGSQLIA Q-----KD IKVSSKDDV LIDGVRNSFS NIKFPDKAN- REKIVQADFI QELNALKATQ EYLNQQAALK  
pit-A5 EQVVKLDTAN GGINLEGAK- VDIQGSQLIA Q-----KD IKVSSKDDV LIDGVRNSFS NIKFPDKAN- REKIVQADFI QELNALKATQ EYLNQQAALK  
pit-C6 EQVVKLDTAN GGINLEGAK- VDIQGSQLIA A-----KD ISVSSKDDV LIDGVRNSFS NIKFPDKAN- REKIVQADFI QELNALKATQ EYLNQQAALK  
bau-C2 EQVVKLDTAN GGINLEGAK- VDIQGSQLIA Q-----KD IKVSSKDDV LIDGVRNSFS NIKFPDKAN- REKIVQADFI QELNALKATQ EYLNQQAALK  
nos-C8 EQVVKLDTAN GGINLEGAK- VDIQGSQLIA Q-----KD IKVSSKDDV LIDGVRNSFS NIKFPDKAN- REKIVQADFI QELNALKATQ EYLNQQAALK  
pit-B7 EQVVKLDTAN GGINLEGAK- VDIQGSQLIA Q-----KD IKVSSKDDV LIDGVRNSFS NIKFPDKAN- REKIVQADFI QELNALKATQ EYLNQQAALK  
bau-B4 EQVVKLDTAN GGINLEGAK- VDIQGSQLIA Q-----KD IKVSSKDDV LIDGVRNSFS NIKFPDKAN- REKIVQADFI QELNALKATQ EYLNQQAALK  
nos-C9 EQVVKLDTAN GGINLEGAK- VDIQGSQLIA Q-----KD IKVSSKDDV LIDGVRNSFS NIKFPDKAN- REKIVQADFI QELNALKATQ EYLNQQAALK  
bau-B1 EQVVKLDTAN GGINLEGAK- VDIQGSQLIA Q-----KD IKVSSKDDV LIDGVRNSFS NIKFPDKAN- REKIVQADFI QELNALKATQ EYLNQQAALK  
pit-B5 ERNFTISGT- GDHVEGK- VDIQGSQLIA Q-----RN INIFSSGDI VDIQGSQLIA Q-----KD IKVSSKDDV LIDGVRNSFS NIKFPDKAN- REKIVQADFI QELNALKATQ EYLNQQAALK  
bau-B3 ETVFRLTMM GSHSLEKNGK VEIQGTIVIR M-----KD LKIIAPDGI KIEGVKNTFN NSTYSKSHDY LFKQRLYYEN KIQEINRLG LNTAQKLLVA  
bau-B2 AGFVGIISRK GGLSLEGT- VDIKGTINQ Q-----KD INIVSTKGDV LIDGVRNSFS NIKFPDKAN- REKIVQADFI QELNALKATQ EYLNQQAALK  
pit-B6 AGFVGIISRK GGLSLEGT- VDIKGTINQ Q-----KD INIVSTKGDV LIDGVRNSFS NIKFPDKAN- REKIVQADFI QELNALKATQ EYLNQQAALK  
bau-A2 RMIKPVLSO GLMDIRADG- V----FOVNG K-----AP PAQTAMWDL KMDRAYFTSN DGINILAG- -TVKMYAGDL KNTSNTAPIN IISTGDIVLD  
bau-A1 KNNKEISSEN GLINISADY- VDLNAARLKS K-----NG ISIVANKGDI SLNSKKTETLN S-INVGMK- -FTESYGDY SEFELFKKNN ---PEYKLLD  
pit-A3 KTSKDISSEN GVINISADY- IDLNAARLKS K-----NG ISIVANKGDI S-INVGMK- -FTESYGDY SEFELFKKNN ---PEYKLLD

1101

cal-C10 DANDQIK- -AGEDW- -MRTAQG -SIALTAK RLKDEGERKL -AQVNE  
bau-C4 DANDQIK- -AGEDW- -MRTAQG -SIALTAK RLKDEGERKL -AQVNE  
pit-C5 AYEDYAS -SNYDYTLVY KHYNLYKDFI SKYPVRPNPR -LLIFGSD VPLFHSIIAV -PORS5  
bau-C3 ILKKRLH -SGNELGFNV SE-----AKKLAES -LKERKYL I KIEISGTTNG -PMLPQ  
cal-C11 NELDEILK- GRKKIEEMMK YSL--TRSVG QKLLQESINK -NQLEEK YPET- -NGLSN  
pit-C7 NINNSINS- KRKEWERRV DDLHSHKRAL SDQLKLEEE -REDIRNK FKDI- -IDQEN  
bau-C1 SELDSTLE- KRKKIEEMMK LPF--TKGV QKLLDEITIM -QNNLEEK YPET- -NGPSN  
pit-A4 KYRNYNDMF- LKYWDYELL QTKNKNSEI VNAVKEYERD -FNVFKD YPIKINYPVP GQLPFL- -GGNNT  
pit-A5 AYEDYTS -SNYDYSLVY KHYNLYKDFI SKYPVRPNPR -LLIFGSD KPLFHSI -FSE- -PORMT  
pit-C6 FFMKEALKV- YARISSGELI EGSPMDREL QKALQKTTKE -FPEYVSK YGP- -LRDQK  
bau-C2 KYOYQNV- NKYWRDSTLD QSKNENAVLV VNAVYNDYHN -YNEFKN YMVKINYPIL GEPPILI- -NLMDS  
nos-C8 NIKKTKNSLE AALSFLFDGS NGEYSAGALS QSDVSNIFY ENAYIQSFSS -EGA-SDT YAMVINNDIV GFLPSVDSIG TLLSSYKAEI KKYKNLNESE  
pit-B7 SLGSQASQIN QLLNDAL SAY TSGVDPLNAS IGYDSENGNY IYVSDNDDGR -AYFVSIPL SGLDLSRYRQ IVLNL- -PAENQ  
bau-B4 SLGSQASQIN QLLNDAL SAY TSGVDPLNAS IGYDSENGNY IYVSDNDDGR -AYFVSIPL SGLDLSRYRQ IVLNL- -PAENQ  
nos-C9 NIKKAKNMLE ASMSYLFNAS NGEYAGALS NVDVSNLTFY ENAYIQSIS EGASDXYIIV IPTGSGYNIQ GFLPSGLYVE VLLNSYKTEI KKYKILNESK  
bau-B1 SMVQQRN- -IMSQ  
pit-B5 QMQEELA- -DLKD  
bau-B3 QYTEEIN- -DITK  
bau-B2  
pit-B6  
bau-A2 AMNYDVI- -GQLDLMLPA QKLRLDELEAS GKDSVTLNT INQLNEEIAF YLSRSLNGT- -RSQSS

1200

cal-C10 DANDQIK- -AGEDW- -MRTAQG -SIALTAK RLKDEGERKL -AQVNE  
bau-C4 DANDQIK- -AGEDW- -MRTAQG -SIALTAK RLKDEGERKL -AQVNE  
pit-C5 AYEDYAS -SNYDYTLVY KHYNLYKDFI SKYPVRPNPR -LLIFGSD VPLFHSIIAV -PORS5  
bau-C3 ILKKRLH -SGNELGFNV SE-----AKKLAES -LKERKYL I KIEISGTTNG -PMLPQ  
cal-C11 NELDEILK- GRKKIEEMMK YSL--TRSVG QKLLQESINK -NQLEEK YPET- -NGLSN  
pit-C7 NINNSINS- KRKEWERRV DDLHSHKRAL SDQLKLEEE -REDIRNK FKDI- -IDQEN  
bau-C1 SELDSTLE- KRKKIEEMMK LPF--TKGV QKLLDEITIM -QNNLEEK YPET- -NGPSN  
pit-A4 KYRNYNDMF- LKYWDYELL QTKNKNSEI VNAVKEYERD -FNVFKD YPIKINYPVP GQLPFL- -GGNNT  
pit-A5 AYEDYTS -SNYDYSLVY KHYNLYKDFI SKYPVRPNPR -LLIFGSD KPLFHSI -FSE- -PORMT  
pit-C6 FFMKEALKV- YARISSGELI EGSPMDREL QKALQKTTKE -FPEYVSK YGP- -LRDQK  
bau-C2 KYOYQNV- NKYWRDSTLD QSKNENAVLV VNAVYNDYHN -YNEFKN YMVKINYPIL GEPPILI- -NLMDS  
nos-C8 NIKKTKNSLE AALSFLFDGS NGEYSAGALS QSDVSNIFY ENAYIQSFSS -EGA-SDT YAMVINNDIV GFLPSVDSIG TLLSSYKAEI KKYKNLNESE  
pit-B7 SLGSQASQIN QLLNDAL SAY TSGVDPLNAS IGYDSENGNY IYVSDNDDGR -AYFVSIPL SGLDLSRYRQ IVLNL- -PAENQ  
bau-B4 SLGSQASQIN QLLNDAL SAY TSGVDPLNAS IGYDSENGNY IYVSDNDDGR -AYFVSIPL SGLDLSRYRQ IVLNL- -PAENQ  
nos-C9 NIKKAKNMLE ASMSYLFNAS NGEYAGALS NVDVSNLTFY ENAYIQSIS EGASDXYIIV IPTGSGYNIQ GFLPSGLYVE VLLNSYKTEI KKYKILNESK  
bau-B1 SMVQQRN- -IMSQ  
pit-B5 QMQEELA- -DLKD  
bau-B3 QYTEEIN- -DITK  
bau-B2  
pit-B6  
bau-A2 AMNYDVI- -GQLDLMLPA QKLRLDELEAS GKDSVTLNT INQLNEEIAF YLSRSLNGT- -RSQSS



1201 1300  
bau-A1 DLNYHYIL--- ----TRYGVSGKG AGQKRIDYAN NEINNAEKEI VLNNTYGVV NLYNRYKLL- ----FSEYA  
pit-A3 DLNYHYIL--- ----TRWGVSGKG AGQKRIDYAN SEINNAEKEI VLNNAAYGVV NLYNRYKIL- ----FSEYA

1201 1300  
cal-C10 TYKTLIANLN GVORNIQD- GANINFYEQS LKGOQHASVN IKSSGGNINL VSAKGLSLSG SKVN-AQQGE VQIEAAGTLT NNIYNIQGGY DSATENSVKQ  
bau-C4 TYKTLITNLN GLORNIQD- GANISFYEQN LKGOQHASVN IKSDIGNINI VSAKGLSLSG SKVN-AQQGE VQIEAAGTLT NNIYNIQGGY DSATENSVKQ  
pit-C5 RFDALYSFEP KYDENYLRSL QAEVDFYNTG INGSHEAEAK LNSKSGNINI TSAKGLSISG GNIS-AQLGQ VNLASGVLA E-----QYKS S1SSGVNQP  
bau-C3 LGAWVLGKIT ILYPQINDI DKAITLYSQS LTGYEHAQPI LRSNNKIDINI AAAGVSISSG AMID-STKG VNIEMAGTIN GETYNIQGGY NSDKENSVKQ  
cal-C11 KIKLS-----IQDI EDNLKYFEEE VNGSEHSEVN FSALSGNINI TSAKGLSISG GNIS-AQSGQ VNLASGVLA E-----QYKS S1SSGVNQP  
pit-C7 KLNLL-----LDER NNYFYFDSN VSGSEHSEAK IISKLGWNI TSAKGLSISG GNIS-AQSGQ VNLASGVLA E-----QYKS S1SSGVNQP  
bau-C1 KLVYI-----IKDV EANISFFKNS INGSHEHETK LTKSGNINI TSAKGLSISG GNIS-AQSGQ VNLASGVLA E-----QYKS S1SSGVNQP  
pit-A4 PLDAPVYVGF KYDNDYINDV EKNELFYKES LNGSEHAETK LTKSGNINI TSAKGLSISG GNIS-AQLGQ VNLASGVLA E-----QYKS S1SSGVNQP  
pit-A5 RFDALYSFEP KYDENYLRSL QAEVDFYNTG INGSHEAEAK LNSKSGNINI TSAKGLSISG GNIS-AQSGQ VNLASGVLA E-----QYKS TINNGANQP  
cal-C6 DFYSEMI-----KLFNVGY VNGEVHSGSK IISNTGNIQV VSNKGLSISG SSMD-AKDGK VNLAAAGALD GEGYNIQGGY NNPTENSVKK  
bau-C2 PFSADYVFSF KYDDNYLNDV KRNELFYKSN LNGSEHSETK LNSKGNINIV TSAKGLSISG GNIS-AQLGQ VNLASGVLA E-----QYKS TTITESNPQP  
nos-C8 KVKDLQKILS KLESQKQSEI KSKELLTKG- VNGSEHTEAK LTKSGNINI TSAKGLSISG GNIS-AQSGQ VNLASGVLA E-----QYKS TTTINTNPQP  
pit-B7 KLNLFNFKIT AFQDKAR-V NQITIFMNNK TNGYEHAKST LTKAGNISL TAARGISISG ANLT-ATAGQ ANIEARAPLV S-----QYTS STINSQTLP  
bau-B4 KLNLFNFKIT VFEQDKAR-V NQITISFMNNK TNGYEAHAST LTKAGNISL TAARGISISG ANLT-ATAGQ ANIEARSPL S-----QYTS STINSQTLP  
nos-C9 AIKDLESMIN KLQSQKQIEL KTKE-FLASN INGNHAEAN LTKSGNINI TSAKGLTISG GNIS-SQLGQ VNLANGALS E-----QYKS TTTIGTAQP  
bau-B1 GLEML-----KTKGKAI EHSYAEILPW TKAAAITGTT PYWAKGNVNI LNSGGIKLEQ TQVD-GLSLV IRAKGLLSQD PD-----VGNK TEILPNSVVI  
pit-B5 ASTFL-----ENGTNGV EHAETVL-----RSLDGDGI ISKGGIKITG ATIQAGYDGK VNLAAQGGSD K-----YNS TTTINTNPQP  
bau-B3 QINFV-----SLGTNGA EHAGSLL-----RSETGK-----VNI VSGGIMITG ADIM-AIDGQ VNLAAQGGSD K-----YNS TALDKNSQPM  
bau-B2 -----NSQDD QEKNFIANT ITGVNFNSE LSTNTGNINI SSKGVSIITG ANID-AKQGI VNIQAQGVLN G-----KYRA TAKKEGTA-  
pit-B6 -----NSQDD QEKNFIANT ITGVNFNSE LSSNAGNINI SSKGVSIITG ANID-AKQGI VNIQAQGVLN G-----KYRA TAKKEGTA-  
bau-A2 HIDAQINIL LSKGILRQV SELYAKNEVN IEAQGLLARD LTG-AQVTV IDTS1LVLDGV HDIY-KNGE ATNSNY-----EERS DFHNS1VSDG  
bau-A1 VILGKKRFNY YFED--FKQV NENIDYSDLN FSGYLHRGGD LLS-DGNINL ISNNGIILNS ANVN-TLGD FT-VYA-----KGL DKKKTAELVE  
pit-A3 VILGKKRFNY YFED--FKQV NENIDYSDLN FSGYLHRGGD LQS-DGNINL ISNNGIILNS ANVN-TLGD FT-VYA-----KGL DKKKTAELVE

1301 1400  
cal-C10 GAIAGSIIID ANQDSYFEGN ESEATYAWRS PVDAPS1YKG KGVKIKATGT NTTDNLILQG VDIRSE-GDV NIEAHKNIIIF DVAVEGYDK STTTETKKKW  
bau-C4 GAIASSIIID ANQDSYFEGN ETDTTYAWRS PVDAPS1YKG KGVKIKATGT NTTDNLVLQG VDIRSE-GDV NIEAHKNIIIF DVAVEGYDK STTTETKKKW  
pit-C5 RILNASIIID GHTDFYDKGS ENDNQSMRT LVSPTIINGD KGVNIRTVGK TKDDNLVLA TGITSKNGDV KIESNKSLF DAALIEQSYDR SITTEKKSWS  
bau-C3 GTIQSSIIID ALQDSYFAK PNDTNSWRS PVPNTEINGY KGVKIKATGQ QKTDNLVLQG VRIDSA-NSV NIEAHKNIIIF DVAVEGYDK SEQETQKKW  
cal-C11 KSLNASIIID GHTDFYDKGS EGENYSFRT LVSPTIINGD KGVNIRTVGK TKDDNLVLA TGITSKNGDV KIESNKSLF DAALIEQSYDR SITTEKKSWS  
pit-C7 RILNASIIID GHTDFYDKGS EGENYSFRT LVSPTIINGD KGVNIRTVGK TKDDNLVLA TGITSKNGDV KIESNKSLF DAALIEQSYDR SITTEKKSWS  
bau-C1 RILNASIIID GHTDFYDKGS ENDNQSMRT LVSPTIINGD KGVNIRTVGK TKDDNLVLA TGITSKNGDV KIESNKSLF DAALIEQSYDR SITTEKKSWS  
pit-A4 KSLNASIIID GHTDFYDKGS EGENYSFRT LVSPTIINGD KGVNIRTVGK TKDDNLVLA TGITSKNGDV KIESNKSLF DAALIEQSYDR SITTEKKSWS  
pit-A5 KSLNASIIID GHTDFYDKGS EGENYSFRT LVSPTIINGD KGVNIRTVGK TKDDNLVLA TGITSKNGDV KIESNKSLF DAALIEQSYDR SITTEKKSWS  
cal-C6 GVLKGSIIID ANQDSYEQGS PSDNDRWFS PVSPTIINGT KGVSIKIVGK QSTDNLILQG VAITSEN-DV NIEAHKNIIIF DVAINNSFNK SQTETKKSWS  
bau-C2 RILNASIIID GHTDFYDKGS ENDNQSMRT LVSPTIINGD KGVNIRTVGK TKDDNLVLA TGITSKNGDV KIESNKSLF DAALIEQSYDR SITTEKKSWS  
nos-C8 RILNASIIID GHTDFYDKGS ENDNQSMRT LVSPTIINGD KGVNIRTVGK SKDDNLVLA TGITSKNGDV KIESNKSLF DAALIEQSYDR SITTEKKSWS  
pit-B7 RTLNASIIID GHTDFYDKGS EADANYSMRT FISPTIINGT KGVNIRTVGK TASNDLVLA TGITASQGDV KIEANKSMLF DAALIEQSYDR STITTEKKSWS  
bau-B4 RTISASIIID GHTDFYDKGS EADNYSMRT FISPTIINGT KGVNIRTVGK TASNDLVLA TGITASQGDV KIEANKSMLF DAALIEQSYDR STITTEKKSWS  
nos-C9 RILNASIIID GHTDFYDKGS ENDNQSMRT LVSPTIINGD KGVNIRTVGK SQSDNLVLA TGITSKNGDV KIESNKSLF DAALIEQSYDR SITTEKKSWS  
bau-B1 QKSPS1YIA GLLDEFYEGN AGANNYGYAS FNTPSYINGV KSVKIELTGG NNGLTIVSSS LN-GGIDG-V NLAASGDLRL EATQEEYKY STKYTKGNW  
pit-B5 MNM-ASIIIA GHTDFYDKGS DTDNSYKAI S VSPPTIEGA -DNIKTVGN SAGDNLVLA VGISAKNQ-V KIEAKNIIIF DVALEQYDR STVKKKSWS  
bau-B3 SMN-AGVILA AHNDYFDRGN ETDQNYQAI LFTPTLVGK RGVNITGGA QEGSNLILQA VGISSEGDV KIESNKSLF DVALEQYDR STVKKKSWS  
bau-B2 KELSASIIID GHTDFYDKGS ETDQNSYRE YVNPNTINGN KGVNIRTVGK TVNDNLVLA VGINSAGQDV NIEADKSLF DTALETLYDR STKTETKRSW  
pit-B6 KEISASIIID GHTDFYDKGS ETDQNSYRE YVNPNTINGN KGVNIRTVGK TVNDNLVLA VGINSAGQDV NIEADKSLF DTALETLYDR STKTETKRSW  
bau-A2 NGINIKSTGS AKLNNDYDNP NLLSNY-ATVT SAKPIQLK-K-----IND GKN-MIVFNG AELISSGGDV NIOSNANIVL EESSTYKHS STSQV1KKTW  
bau-A1 NQLDSSIVFA NVKDDQYELGR DNENYQKID ITKPNIN-A KVNVL-IAND QSGNLILQG TD-1KAADTV NIVGSGNIDF RHNVDNYTK TQQT1TKESL  
pit-A3 NQLDSSIVFA NVKDDQYELGR DNENYQKID ITKPNIN-A KVNVL-IAND QSGNLILQG TD-1KAADTV NIVGSGNIDF RHNVDNYTK TQQT1TKESL

1401 1500  
cal-C10 YG-KKTTTT WNTSNKSEGV SVNINAKNIS IKSKEQNTKE MTGKNR-----TSIDMYSSQF TATGGKISIQ AGGDLNFLTALDVEQNTDDI TKKSSFLGV-  
bau-C4 YG-KKTTTT WNTSNKSEGV SVNINAKNIS IKSKEQNTKE MTGKNR-----TSIDMYSSQF TATGGKISIQ AGGDLNFLTALDVEQNTDDI TKKSSFLGV-  
pit-C5 GGLKKYIIT VSENNTNAA SVDISAKNIS IETKLDPSV DAKTPD-----NNIDYSGRF TAEGGTISIK SGGNLFYTV EESSSNVDI TKKSSFAGI-  
bau-C3 YG-KKTRIT WNTSNKSLGI SVDIVAKDIN IRSEGNTEA MKGDR-----TSIDMYSSNL TANGGKVTIQ AGGDLNFLTALDVEQNTDDI TKKKTWGT-  
cal-C11 GGLKKYIIT VSENNTNAA SVDISAKNIS IETKLDPSV DAKTPD-----NNIDYSGRF TAEGGTISIK SGGNLFYTV EESSSNVDI TKKTSYSKLI  
pit-C7 GGLKKYIIT VSENNTNAA SVDISAKNIS IETKLDPSV DAKTPD-----NNIDYSGRF TAEGGTISIK SGGNLFYTV EESSSNVDI TKKTSYSKLI  
bau-C1 GGLKKYIIT VAESNDTAA SVDISGKNIF IETKLDPSV DAKNPD-----NNIDYSGRF TADGGKITIN SGGNLFYTV EESSSNVDI TKKSSFAGI-  
pit-A4 GGLKKYIIT VSENNTNAA SVDISAKNIS IETKLDPSV DAKTPD-----NNIDYSGRF TAEGGTISIK SGGNLFYTV EESSSNVDI TKKTSYSKLI  
pit-A5 GGLKKYIIT VSENNTNAA SVDISAKNIS IETKLDPSV DAKNPD-----NNIDYSGRF TAEGGTISIK SGGNLFYTV EESSSNVDI TKKTSYSKLI  
cal-C6 YG-KKKTIT TQDEKSGGL SVDIDAKNIN LKSOAKNTPA MSQGNR-----TSIDMYSSQL TAIDGKINIQ AGGDLNFLTALDVEQNTDDI SKKSSFLGV-  
bau-C2 GGLKKYIIT VAENNDTAA SVDISGKNIF IETKLDPSV DVKNPD-----NNIDYSGRF TADGGKITIN SGGNLFYTV EESSSNVDI TKKSSFAGI-  
nos-C8 GGLKKYIIT VAESNDTAA SVDISGKNIF IETKLDPSV NVSTPD-----NNIDYSGRF TAEGGQIKIN SGGNLFYTV EESSSNVDI TKKSSFAGI-  
pit-B7 GGLKKYIIT IEETNITNAA SVDISGKNIF IETKLDPSV DPTKPD-----NNIDYSGRF TAEGGQISIK SGGNLFYTV EETSSKVDI TKKSSFAGI-  
bau-B4 GGLKKYIIT IEETNITNAA SVDISGKNIF IETKLDPSV DPTKPD-----NNIDYSGRF TAEGGQISIK SGGNLFYTV EETSSKVDI TKKSSFAGI-  
nos-C9 GGLKKYIIT IAESNANAA SVDISGKNIF IETKLDPSL N-----TPD-----NNIDYSGRF TADGGKITIN SGGNLFYTV EESSSNVDI TKKSSFAGI-  
bau-B1 YKRTVTEIE TYNTPTPT S1-1SNRDIK ISSN-----GSLTLVSTDL QSHDGNINLN AGGYLRLWTK PTFQSFQIDV SKKSKLFGV-  
pit-B5 GGLKKYIIT VMENELIRPA SVDIDAKNIN IESKEVNV-----PO-----NLSIDYGGQL TANGGMISVR SGGNLFYTV PESSKTIDV NKS51MG-  
bau-B3 GGLKKYIIT FSENESTRA SVDISGKNIF IESKELN-----KN-----NKIDYSGQF TAEGGQVIFR SGGDLFFNTV NEISKQVLE NKS51LGI-  
bau-B2 YG-KKKTIT TTIGDVTTPA SVDIYGNIN VISQFNPLR ADGTRDPALN TSVDIYARF NANGGKISIR SGGDLNFLTAVAVNNSNVQ VKKSSWLGI-  
pit-B6 YG-KKKTIT TTIGDVTTPA SVDIYGNIN VISQFNPLR ADGTRDPALN TSVDIYARF NANGGKISIR SGGDLNFLTAVAVNNSNVQ VKKSSWLGI-  
bau-A2 YGKKKSTETV TQSQYGTAVP TTILAKN-1S LKA-A-----GDIDFYSTLM KANSGNVNI-TGENYFLT S NNYANTSTT KKNSS1LGT-  
bau-A1 FGLKSSSTTE TRILEYVIGK SDVLKANKIN IESLGG-----G5ISLYGTQI QAPKQVVKL AAKDIYMTVF QDQINEVNTF KKDAGFLGL-  
pit-A3 FGLKSSSTTE TKLEGVYIGK SDVLKANKIN IESLGG-----G5ISLYGTQI QAPKQVVKL AAKDIYMTVF QDQINEVNTF KKDAGFLGL-

1501 1600  
cal-C10 ---KLNKSK TATRNIKAEL PATLKADY-I GTSGLDTRL KGPPEFYLSG -ATIEAG-----GVISI ESASNVVEQT LKRDKNSVWV QSMODKGSIT  
bau-C4 ---KLNKSK TATRNIKAEL PATLKADY-I GTSGLDTRL KGPPEFYLSG -ATIEAG-----GVISI ESASNVVEQT LKRDKNSVWV QSMODKGSIT  
pit-C5 ---KYNTSK NATRTOVTEI PATLKADY-I GTSVYDTRL VGTFEYLLG -STIEAG-----GKLEL IAAKTSITDL LKKEKNSVWV QSMODKGSIT  
bau-C3 ---KYNDKS TNTRDIKSEI PAVLTADY-I TTKSGFTRL KGTFFYLLG -ATIEAG-----GKIQL EGASSTVSET LKKEKNSVWV QSMODKGSIT  
cal-C11 SLLASSKTTT NTRTQISEL PATLKADY-I GTSGGFTRL VGTFEYLLG -ATIEAG-----GKLEL IAAKTSITDL LKKEKNSVWV QSMODKGSIT  
pit-C7 SLLASSKTTT NTRTQISEL PATLKADY-I GTSGGFTRL VGTFEYLLG -ATIEAG-----GKLEL IAAKTSITDL LKKEKNSVWV QSMODKGSIT  
bau-C1 ---KYNTSK NATRTOVTEI PATLKADY-I GTSGGFTRL VGTFEYLLG -ATIEAG-----GKLEL IAAKTSITDL LKKEKNSVWV QSMODKGSIT  
pit-A4 SLLGSSKTTT NTRTQISEL PATLKADY-I NTQAVDKTL VGTFEYLLG -ATIEAG-----GKLEL IAAKTSITDL LKKEKNSVWV QSMODKGSIT  
pit-A5 SLLGSSKTTT NTRTQISEL PATLKADY-I NTQAVDKTL VGTFEYLLG -ATIEAG-----GKLEL IAAKTSITDL LKKEKNSVWV QSMODKGSIT  
cal-C6 ---KLNKSK TNTRNVKSEL PAELNADY-I GTSGGFTRL KGTFFYLLG -AEIQAG-----GKLEL IAAKTSITDL LKKEKNSVWV QSMODKGSIT  
bau-C2 ---KYNTSK NATRTOVTEI PATLKADY-I GTSGGFTRL VGTFEYLLG -ATIEAG-----GKLEL IAAKTSITDL LKKEKNSVWV QSMODKGSIT  
nos-C8 ---KYNTSK NATRTOVTEI PATLKADY-I GTSGGFTRL VGTFEYLLG -ATIEAG-----GKLEL IAAKTSITDL LKKEKNSVWV QSMODKGSIT  
pit-B7 ---KYNTSK NATRTOVTEI PATLKADY-I GTSGGFTRL VGTFEYLLG -ATIEAG-----GKLEL IAAKTSITDL LKKEKNSVWV QSMODKGSIT  
bau-B4 ---KYNTSK NATRTOVTEI PATLKADY-I GTSGGFTRL VGTFEYLLG -ATIEAG-----GKLEL IAAKTSITDL LKKEKNSVWV QSMODKGSIT  
nos-C9 ---KYNTSK NATRTOVTEI PATLKADY-I GTSGGFTRL VGTFEYLLG -ATIEAG-----GKLEL IAAKTSITDL LKKEKNSVWV QSMODKGSIT  
bau-B1 ---KYNTSK SSTRSVESEL PAVLVAQRNT NLSGNTTWI RSEFENKLG HAEIKAGVGE NAVEGAQIIL QDQIVTITET KKRDKNSVWV QSMODKGSIT  
pit-B5 ---KYNTSK NSTHNVVTOI PTKLVADY-I GTSGGFTRL VGTFEYLLG -ATIEAG-----GKIFL EPAITNISTK LKKEKNSVWV QSMODKGSIT  
bau-B3 ---KYNTSK NSSYQVTVQI PSTLTSY-I GTSGGFTRL AGTFENYLLG -ATIEAG-----GKIFL EPSVTSINNT LKKEKNSVWV QSMODKGSIT  
bau-B2 ---NLGTSK NATRNOQTEI PAKLKADY-I GTSGYDTRL EGTFEYLLG -ATIEAG-----GKIFL VPAKLVVEES LNRKNSVWV QSMODKGSIT  
pit-B6 ---NLGTSK NATRNOQTEI PAKLKADY-I GTSGYDTRL EGTFEYLLG -ATIEAG-----GKIFL VPAKLVVEES LNRKNSVWV QSMODKGSIT  
bau-A2 ---MLGTSK TSSRSQISQL PAKLVGDY-L STESKNDTVF VGTFEYLLG -ASVKAG-----GQIAF LGASETISQA LKVEKNSVWV QSMODKGSIT  
bau-A1 ---EYRDSNS VGSKLVNNOI PTVITGRY-I ASSSGGSTYL EGTFQNFTEG -VSIKVDGDP NPSEDALVI NSAKGLYSNS QDNKKNFTF QSMESRGVTE  
pit-A3 ---EYRDSNS VGSKLVNNOI PTVITGRY-I ASSSGGSTYL EGTFQNFTEG -VSIKVDGDP NPSEDALVI NSAKGLYSNS QDNKKNFTF QSMESRGVTE

1601 cal-C10 ETAQLPSFNG PVLPTFKATG GLSVQVPISE KDANKVELRD EILKLANHPG NTYLKELVNR KD--VDWQTV LLTKQDWDYK SOGLTAAGAA IIVIVTIVT  
bau-C4 ETAQLPSFNG PVLPTFKAAAG GLSVQVPISE KDANKVELRD EILKLANOPG NAYLKELVNR KD--VDWQKV LLTKQDWDYK SOGLTAAGAA IIVIVTIVT  
pit-C5 ETAQLPSFNG PVLPTFKAAAG GLSVQVPISE KDANKVELRD AIDLKSKPPG NEYLKELVNR KD--VDWQTV LLTKQDWDYK SOGLTAAGAA IIVIVTILT  
bau-C3 ETAQLPSFNG PVLPTFKAAAG GLSVQVPISE KDANKVELRD EILKLANOPG NAYLKELVNR KD--VDWQVQ LLTKQDWDYK SOGLTAAGAA IIVIVTIVT  
cal-C11 ETAQLPSFNG PVLPTFKAAAG GLSVQVPISE KDANKIELRD AILEL SKOPP NEYLKELVNR KD--VDWQMV LLTKQDWDYK SOGLTAAGAA IIVIVTMTV  
pit-C7 ETAQLPSFNG PVLPTFKAAAG GLSVQVPISE KDANKIELRD AILEL SKOPP NEYLKELVNR KD--VDWQMV LLTKQDWDYK SOGLTAAGAA IIVIVTMTV  
bau-C1 ETAQLPSFNG PVLPTFKAAAG GLSVQVPISE KDANKVELRD EILKLANOPG NAYLKELVNR KD--VDWQTV LLTKQDWDYK SOGLTAAGAA IIAIVAVLT  
pit-A4 ETAQLPSFNG PVLPTFKAAAG GLSVQVPISE KDANKVELRD AIDLKSKPPG NEYLKELVNR KD--VDWQIV LLTKQDWDYK SOGLTAAGAA IIVIVTIVT  
pit-A5 ETAQLPSFNG PVLPTFKAAAG GLSVQVPISE KDANKVELRD AIDLKSKPPG NEYLKELVNR KD--VDWQKV LLTKQDWDYK SOGLTAAGAA IIVIVTIVT  
pit-C6 ETAQLPSFNG PVLPTFKAAAG GLSVQVPISE KDANKVELRD EILKLANOPG NAYLKELVNR KD--VDWQTV LLTKQDWDYK SOGLTAAGAA IIVIVTIVT  
bau-C2 ETAQLPSFNG PVLPTFKAAAG GLSVQVPISE KDANKVELRD EILKLANOPG NAYLKELVNR KD--VDWQTV LLTKQDWDYK SOGLTAAGAA IIVIVTIVT  
nos-C8 ETAQLPSFNG PVLPTFKAAAG GLSVQVPISE KDANKVELRD EILKLANOPG NAYLKELVNR KD--VDWQVI LLTKQDWDYK SOGLTAAGAA IIVIVTIVT  
pit-B7 ETAQLPSFNG PVLPTFKAAAG GLLVQVPISE VDANKVELRD EILKLANOPG NAYLKELVNR ND--VNWQII LLTKQDWDYK SOGLTAAGAA IIAIVAVLT  
bau-C1 ETAQLPSFNG PVLPTFKAAAG GLLVQVPISE IDANKVELRD EILKLANOPG NAYLKELVNR ND--VNWQII LLTKQDWDYK SOGLTAAGAA IIAIVAVLT  
nos-C9 ETAQLPSFNG PVLPTFKAAAG GLSVQVPISE TDANKVELRD EILKLANOPG NAYLKELVNR KD--VDWQVI LLTKQDWDYK SOGLTAAGAA IIVIVTIVT  
bau-B1 ETAQLPSFNG PVLPTFKATG GLSVQVPISE KDANKVELRD EILKLANOPG NAYLKELVNR ND--VDWQKV LLTKQDWDYK SOGLTAAGAA IIAIVAVLT  
pit-B5 ETAQLPSFNG PVLPTFKATG GLSVQVPISE KDANKVELRD EILKLANOPG NAYLKELVNR ND--VDWQKV LLTKQDWDYK SOGLTAAGAA IIVIVTIVT  
bau-B3 ETAQLPSFNG PVLPTFKAAAG GLAVQVPISE D-----VRS ALDTLVNQQG TTYLKLVLNR ND--VDWQAV KLAQQQWDYK SOGLTPAGAA IIVIVTIVT  
bau-B4 ETAQLPSFNG PVLPTFKAAAG GLVQVPISE IDANKVELRD EILKLANOPG NAYLKELVNR KD--IDWQTV LLTKQDWDYK SOGLTAAGAA IIVIVTIVT  
pit-B6 ETAQLPSFNG PVLPTFKAAAG GLSVQVPISE KDANKVELRD EILKLANOPG NAYLKELVNR KD--VDWQTV LLTKQDWDYK SOGLTAAGAA IIVIVTIVT  
bau-A2 ETTLKPNFNG PTPPTFKASG GLIVQVPISE NKNN--DIRT EVINLANOPG NEYLKELVNR KD--VNWQAV KLAQENWDYK SOGLTAAGAA IIVIVTIVT  
bau-A1 ELANLPKFNG PVN-NIKIDG NLSVQVPIKQ GEN--EVID IINLSKEKG YEYLKTLIDN KDKNVNWTAL ELTKNWDYK QOGLTPAGAA ILTIVTALT  
pit-A3 ELANLPKFNG PVN-NIKIDG NLSVQVPIKQ GEN--EVID IINLSKEKG YEYLKTLIDN KDKNVNWTAL ELTKNWDYK QOGLTPAGAA ILTIVTALT

1701 cal-C10 MGSCTAAAA-----GAAG GTAASGTTVG LGASMIGSA- GVTTATVGGV TTIITGVSTLG AMANAAITSL ATQASVGLIN NGDGIGTKL DLGSKDINK  
bau-C4 MGSCTAAAA-----GAAG GTAASGTTVG LGASMIGSA- GVTTATVGGV TTIITGVSTLG AMANAAITSL ATQASVGLIN NGDGIGTKL DLGSKDINK  
pit-C5 MGSCTAAAA-----GAAG GTAASGTTVG LGASMIGSA- GVTTATVGGV TTIITGVSTLG AMANAAITSL ATQASVGLIN NGDGIGTKL DLGSKDINK  
bau-C3 MGSCTAAAA-----GAAG GTAASGTTVG LGASMIGSA- GVTITTAAGAI VP-----STLG AMANAAITSL ATQASVGLIN NGDGIGTKL DLGSKDINK  
cal-C11 AGAGAAVVG-----ALGGSAAATL- GGSATA-----MTQAALTSL ATQASVGLIN NGDGIGTKL DLGSKDINK  
pit-C7 AGAGAAVVG-----ALGGSAAATL- GGSATA-----MTQAALTSL ATQASVGLIN NGDGIGTKL DLGSKDINK  
bau-C1 YGAGTALIGT TAAAGAGTTT AAVGTTTVA AGGGTTTFF- GGMTLATTTA AGVTTYTTG IMVNAALTSI ATQASVGLIN NGDNVQTLK DLGSKDINK  
pit-A4 AGAG-AAVV-----GALG GSAAT-----LGSASV-----AMTQAALTSL ATQASVGLIN NGDGIGTKL DLGSKDINK  
pit-A5 MGTGTA AAA-----GAAG GTAASGTTVG LGASMIGSA- GVTTATVGGV TTIITGVSTLG AMANAAITSL ATQASVGLIN NGDGIGTKL DLGSKDINK  
pit-C6 MGSCTAAAA-----GAAG GTAASGTTVG LGASMIGSA- GVTTATVGGV TTIITGVSTLG AMANAAITSL ATQASVGLIN NGDGIGTKL DLGSKDINK  
bau-C2 MGSCTAAAA-----GAAG GTAASGTTVG LGASMIGSA- GVTITTAAGAI VP-----STLG AMANAAITSL ATQASVGLIN NGDGIGTKL DLGSKDINK  
nos-C8 MGSCTAAAA-----GAAG GTAASGTTVG LGASMIGSA- GVTTATVGGV TTIITGVSTLG AMANAAITSL ATQASVGLIN NGDGIGTKL DLGSKDINK  
pit-B7 YGAGVAAALGT TTVAAAGGAT TTVGTTTVA VGAGGSATAF GGTVLATTTA AGVTTYTTG IMVNAALTSI ASQASVGLIN NGDNVQTLK DLGSKDINK  
bau-B4 YGAGVAAALGT TTVAAAGGAT TTVGTTTVA VGAGGSATAF GGTVLATTTA AGVTTYTTG IMVNAALTSI ASQASVGLIN NGDNVQTLK DLGSKDINK  
nos-C9 MGSCTAAAA-----GAAG GTAASGTTVG LGASMIGSA- GVTTATVGGV TTIITGVSTLG AMANAAITSL ATQASVGLIN NGDGIGTKL DLGSKDINK  
bau-B1 AGAG-ATVV-----GALG GTAST-----LGSASV-----AMSQAALTSI ASQASVGLIN NGDGIGTKL DLGSKDINK  
pit-B5 MGTGTA AAA-----GAAG GTAASGTTVG LGASMIGTA- VTTTAAAGAI VP-----STLG AMANAAITSL ATQASVGLIN NGDGIGTKL EMGSKDINK  
bau-B3 YGYGAAGAG-----AALF QTSSA-----TSS AMANAAITSL ASQASVGLIN NGDGIGTKL EMGSKDINK  
pit-B6 MGSCTAAAA-----GAAG GTAASGTTVG LGASMIGTA- GVTTTAAAGAI VP-----STLG AMANAAITSL ATQASVGLIN NGDGIGTKL EMGSKDINK  
pit-B8 MGSCTAAAA-----GAAG GTAASGTTVG LGASMIGTA- GVTITTAAGAI VP-----STLG VMANAAITSL ATQASVGLIN NGDGIGTKL EMGSKDINK  
bau-A2 MGSCTAAAA-----GAAG GTAASGTTVG LGASMIGTA- GVTTTAAAGAI VP-----STLG VMANAAITSL ATQASVGLIN NGDGIGTKL EMGSKDINK  
bau-A1 AGAGSSAA-----GALGFSTT- GVASS-----MAQAALTSI STQASVGLIN NGDNVAAATLR ELGSDQIRN  
pit-A3 AGAGSSAA-----GALGFSTT- GVASS-----MAQAALTSI STQASVGLIN NGDNVAAATLR ELGSDQIRN

1801 cal-C10 LAASVVTAGL LNVGATNLNI SS-----NAIVN--DI ANMATGMIQ VVGSTLIDSA VNGRDLSEGL EKALLAGLAN SLQAPLAGAI GDT---LGMS  
bau-C4 LAASVVTAGL LNVGATNLNI SS-----NAIVN--DI ANMATGMIQ VVGSTLIDSA VNGRDLSEGL EKALLAGLAN SLQAPLAGAI GDT---LGMS  
pit-C5 LAASVVTAGL LNVGATNLNI SS-----NAIVN--DI ANMATGMIQ VVGSTLIDSA VNGRDLSEGL EKALLAGLAN SLQAPLAGAI GDT---LGMS  
bau-C3 LATSVTAGV LSQVSTELM SDL-SKMTKQ GEFMK-----EV VGRTTQGIIN AGASSLVTTA INGGSLSENL SNALLTNTAM ALQASLSGQI ---K---LLES  
cal-C11 LAASVVTAGL LSQVSTELM KPDSTVFS- DRLVN--NF TSSVSTLVQ T-----AIN-- --GGLEENL KVALLSGLAG ALQOQMAQNI KGL---EDT-  
pit-C7 LAASVVTAGL LSQVSTALNL KPDSTVFS- DRLVN--NF TSSVSTLVQ T-----AIN-- --GGLEENL KVALLSGLAG ALQOQMAQNI KGL---EDT-  
bau-C1 LATSVTAGV LDKVGGTAM QSLKALGNTF DVLMLAAKT ATAIETTR I T-----GINST ITGESFSDGL EDLLYQSLGT AVQGTMAQNI HLN---KEII  
pit-A4 LAASVVTAGL LSQVSTALNL KP-DSTVL-S DRLIN--NF TSSVSTLVQ T-----TA IKGGLEENL KVALLAGLAG ALQOQMAQNI GDS---LYKA  
pit-A5 LATSVTAGV LSKIASIDQM KALQETTK-S GEFFT--NL SGRVQALVN STVSASVDTA VNGGSLSEKL SASLVAGLSV ALQOQMAQNI GEN---LDLG  
pit-C6 LAASVVTAGL MSQVGSALNL KP-DSTLL-P DRLAN--NF ASSVSTLVQ T-----TA IKGGDLGDNL QVALLAGLAG ALQOQMAQNI -----K  
bau-C2 LAASVVTAGL MSQVGSALNL KP-DSTLL-P DRLAN--NF ASSVSTLVQ T-----TA IKGGDLGDNL QVALLAGLAG ALQOQMAQNI -----K  
nos-C8 LATSVTAGV MSQVGSALNL KP-DSTML-P DRLIN--NF SSSVSTLVQ T-----TA IKGGDLGDNL QVALLAGLAG ALQOQMAQNI GDS---LYKS  
pit-B7 LATSVTAGV LDKVGGTAM QOQNGTGV-T DRIVT--NL VNSTGSALVS T-----TA INGGDLNDNL QTALLGGLAT AVQOYLSNNI SG---IQOQ  
bau-B4 LATSVTAGV LDKVGGTAM QOQNGTGV-T DRIVT--NL VNSTGSALVS T-----TA INGGDLNDNL QTALLGGLAT AVQOYLSNNI SG---IQOQ  
nos-C9 LAASVVTAGL MSQVSSALNI NLNDMPRL- EKLAN--NF VQVGSNIIS T-----SS IQGENLSDNL DSIIISGLTS ALHAETIAGI GENFSPLLKD  
bau-B1 LAASVVTAGL LSQV-S-TAL- ---NLKPD5 TLFP--DR LMNFTTSVVG STL---VQTA INGGDLGDNL QVALLAGLAG ALQOQMAQNI GTS---LDKV  
pit-B5 LAASVVTAGL LSQV-S-TAL- ---NLKPD5 TLFP--DR LMNFTTSVVG STL---VQTA INGGDLGDNL QVALLAGLAG ALQOQMAQNI GTS---LDKV  
bau-B3 LAVSVLSAGA LSAGVGTAM QNLEKLKQSG DRLV--KI VQNTAQALVN STIAGAGINTA VSGNSLSENL ENYLASGAM ALQOQMAQNI -KP---LE5Q  
bau-B2 LAASVVTAGL LSQVGTALNL KPDSTLL-S DRLAN--NF ASSVSTLVQ T-----TA INGGDLGDNL QVALLAGLAG ALQOQMAQNI GTS---LDKV  
pit-B6 LAASVVTAGL LSQVGTALNL KPDSTLL-S DRLAN--NF ASSVSTLVQ T-----TA INGGDLGDNL QVALLAGLAG ALQOQMAQNI GTS---LDKV  
bau-A2 LATSVTAGV LSTVGLDWM EKLDMGTD P NLLV--NL AGRTGATVE AGLSAGISS INGGSLDNL QGMLLSFFAT ALQOQMAQNI GKE---LGM  
bau-A1 LVASIATAGA LKISVQFNL PETSTAFND- ---RLVYAFVN STSSSIINSA INGGSLDNL EASLLAGLSN SLQAEFAQNI GLS---LDTK  
pit-A3 LVASIATAGA LKISVQFNL PETSTAFND- ---RLVYAFVN STSSSIINSA INGGSLDNL EASLLAGLSN SLQAEFAQNI GLS---LDTK

1901 cal-C10 SNAFVSKVVA IAHAHAAGC- ATGVIDKECQ SRALGAALGE VIAENM-FKP A-NGIEYTEA E-----KSKI LNITKLTGGV VAAYAGYDVT AAANAADTAVSNN  
bau-C4 SNAFVSKVVA IAHAHAAGC- ATGVVDNECK SRALGAALGE VIAENM-FKP A-NGIEYTEA E-----KSKI LNITKLTGGV VAAYAGYDVT AAANAADTAVSNN  
pit-C5 SNAFVSKVVA IAHAHAAGC- ATGVIDKECQ SRALGAALGE VIAENM-FKP A-NGIEYTEA E-----KSKI LNITKLTGGV VAAYAGYDVT AAANAADTAVSNN  
bau-C3 NELDMDYVLH KVAHAAGCV AASISRSECE SGAIGAAIGE IVAEHM-DKS I-DSKFNND NDIQNYQQKV RDVSKLVASS VATLAGYDNP TAANSAEIILNN  
cal-C11 ----NYIAH KLAHALAGCI AGAIQG-QCQ AGAIGGAVGE IVAGFT--PP S-SGLLYTEE E-----KQKI LMVQQLTSGI IAAYAGYDVN VASNSANIALTNN  
pit-C7 ----NYIAH KLAHALAGCI AGAIQG-QCQ AGAIGGAVGE IVADFI--PP S-SGLLYTEE E-----KQKI LMVQQLTSGV IAAYAGYDVN VASNSANIALTNN  
bau-C1 SDTLMKYLTH QVAHATAGCT GAAGGGGECI AGAIGGAVGE IVAEYI--KQ Y-S-----D-----KQKI TNISNAMAVT IAAYAGYDVA TAQOQSETAVSNN  
pit-A4 DPVGLQYIIL KVAHAAGCV VAATKQSCCE AGAIGGAVGE IIAELMYPG K-TALDLDND E-----INRI KGVSKIVAGS ISAYAGYDVN TAANSADTAVSNN  
pit-A5 SKELSDQIHL KVAHAAGC- IAASLQEKCE AGAIGGAVGE MVAGSFDMEP E-NDGYSQA Q-----LNKV KNVGQLISGV VAASAGYDVT VASQASATVANN  
pit-C6 GLEDVNYIHL KVAHAAGC- AAAATKQSCCE AGAIGGAVGE IIAQEM-LHG R-NPTFVSAE E-----KAKI EAYSKLIAGT ISAYAGYDVN TAANSATIAIQQN  
bau-C2 GLEDVNYIHL KVAHAAGC- AAAATKQSCCE AGAIGGAVGE IIAQEM-LHG R-NPTFVSAE E-----KAKI EAYSKLIAGT ISAYAGYDVN TAANSATIAIQQN  
nos-C8 DPITLQYIIL KVAHAAGC- AAAATKQSCCE AGAIGGAVGE IVASLM-PKP I-NGIEYNDE E-----KVKI KNVGKLVAGV V5AYAGYDVN TAANSADTAVSNN  
pit-B7 SNTLDYIHL KVAHAAGC- AGSIOK-DCA AGAIGGAVGE VFADTI--T G-NKYDYTDA Q-----LNAI KEGSKALAAAT VAAYAGYDVN TAISSADTAVSNN  
bau-B4 SNTLDYIHL KVAHAAGC- AGSIOK-DCA AGAIGGAVGE VFADTI--T G-NKYDYTDA Q-----LNAI KEGSKALAAAT VAAYAGYDVN TAISSADTAVSNN  
nos-C9 NPDIFFDYHL KVAHAAGC- IGSIOK-QCE AGAIGGAVGE IIAETIINDS L-NQQTTINE E-----LEI KNYGKLSGI ISAYAGYDVN IAANSADTAVSNN  
bau-B1 DPNIFFEYTH KVAHAAGC- AAAATKQSCCE AGAIGGAVGE IVAGLMPEPA A-NGIEYDVA E-----KLI RNIGKLVSGT VAAYAGYDVN TAANSADTAVSNN  
pit-B5 DPNIFFEYTH KVAHAAGC- AAAATKQSCCE AGAIGGAVGE IVAGLMPEPA A-NGIEYDVA E-----KLI RNIGKLVSGT VAAYAGYDVN TAANSADTAVSNN  
bau-B3 GFSI-EYVHL KVAHAAGC- AAAATKQSCCE AGAIGGAVGE VAAEYLRKRP VFESVDDALA Y-----KNQI VEVSQIAGA IAIVTGYDVS TAMASADNALKNN  
pit-B2 DPNIFFEYTH KVAHAAGC- AAAATKQSCCE AGAIGGAVGE IVAGLMIPAG K-TALDLDTA E-----RTKI KDTSKLIAGT TAAFAGYDVN TAANSADTAVSNN  
bau-B6 DPNIFFEYTH KVAHAAGC- AAAATKQSCCE AGAIGGAVGE IVAGLMIPAG K-TALDLDTA E-----RTKI KDTSKLIAGT TAAFAGYDVN TAANSADTAVSNN  
bau-A2 NKTDENIHL KVAHAAGC- AGAIQK-QCE SGAIGGAVGE FVAEFMPAAS GNGVYSDEK -----ERV LAVGKILAG VAGITGYDVN VASSANTALLNN  
bau-A1 DPTVIDSLH KVAHAAGC- TGAIQK-QCE AGAIGGAVGE IVAGMIEOPN KDATVEDISK Y-----QEKV INTSKLISGS LASLAGYDAG YAASASLAVSNN  
pit-A3 DPTVIDSLH KVAHAAGC- TGAIQK-QCE AGAIGGAVGE IVAGMIEOPN KDATVEDISK Y-----QEKV INTSKLISGS LASLAGYDAG YAASASLAVSNN

2003 cal-C10 SNAFVSKVVA IAHAHAAGC- ATGVIDKECQ SRALGAALGE VIAENM-FKP A-NGIEYTEA E-----KSKI LNITKLTGGV VAAYAGYDVT AAANAADTAVSNN  
bau-C4 SNAFVSKVVA IAHAHAAGC- ATGVVDNECK SRALGAALGE VIAENM-FKP A-NGIEYTEA E-----KSKI LNITKLTGGV VAAYAGYDVT AAANAADTAVSNN  
pit-C5 SNAFVSKVVA IAHAHAAGC- ATGVIDKECQ SRALGAALGE VIAENM-FKP A-NGIEYTEA E-----KSKI LNITKLTGGV VAAYAGYDVT AAANAADTAVSNN  
bau-C3 NELDMDYVLH KVAHAAGCV AASISRSECE SGAIGAAIGE IVAEHM-DKS I-DSKFNND NDIQNYQQKV RDVSKLVASS VATLAGYDNP TAANSAEIILNN  
cal-C11 ----NYIAH KLAHALAGCI AGAIQG-QCQ AGAIGGAVGE IVAGFT--PP S-SGLLYTEE E-----KQKI LMVQQLTSGI IAAYAGYDVN VASNSANIALTNN  
pit-C7 ----NYIAH KLAHALAGCI AGAIQG-QCQ AGAIGGAVGE IVADFI--PP S-SGLLYTEE E-----KQKI LMVQQLTSGV IAAYAGYDVN VASNSANIALTNN  
bau-C1 SDTLMKYLTH QVAHATAGCT GAAGGGGECI AGAIGGAVGE IVAEYI--KQ Y-S-----D-----KQKI TNISNAMAVT IAAYAGYDVA TAQOQSETAVSNN  
pit-A4 DPVGLQYIIL KVAHAAGCV VAATKQSCCE AGAIGGAVGE IIAELMYPG K-TALDLDND E-----INRI KGVSKIVAGS ISAYAGYDVN TAANSADTAVSNN  
pit-A5 SKELSDQIHL KVAHAAGC- IAASLQEKCE AGAIGGAVGE MVAGSFDMEP E-NDGYSQA Q-----LNKV KNVGQLISGV VAASAGYDVT VASQASATVANN  
pit-C6 GLEDVNYIHL KVAHAAGC- AAAATKQSCCE AGAIGGAVGE IIAQEM-LHG R-NPTFVSAE E-----KAKI EAYSKLIAGT ISAYAGYDVN TAANSATIAIQQN  
bau-C2 GLEDVNYIHL KVAHAAGC- AAAATKQSCCE AGAIGGAVGE IIAQEM-LHG R-NPTFVSAE E-----KAKI EAYSKLIAGT ISAYAGYDVN TAANSATIAIQQN  
nos-C8 DPITLQYIIL KVAHAAGC- AAAATKQSCCE AGAIGGAVGE IVASLM-PKP I-NGIEYNDE E-----KVKI KNVGKLVAGV V5AYAGYDVN TAANSADTAVSNN  
pit-B7 SNTLDYIHL KVAHAAGC- AGSIOK-DCA AGAIGGAVGE VFADTI--T G-NKYDYTDA Q-----LNAI KEGSKALAAAT VAAYAGYDVN TAISSADTAVSNN  
bau-B4 SNTLDYIHL KVAHAAGC- AGSIOK-DCA AGAIGGAVGE VFADTI--T G-NKYDYTDA Q-----LNAI KEGSKALAAAT VAAYAGYDVN TAISSADTAVSNN  
nos-C9 NPDIFFDYHL KVAHAAGC- IGSIOK-QCE AGAIGGAVGE IIAETIINDS L-NQQTTINE E-----LEI KNYGKLSGI ISAYAGYDVN IAANSADTAVSNN  
bau-B1 DPNIFFEYTH KVAHAAGC- AAAATKQSCCE AGAIGGAVGE IVAGLMPEPA A-NGIEYDVA E-----KLI RNIGKLVSGT VAAYAGYDVN TAANSADTAVSNN  
pit-B5 DPNIFFEYTH KVAHAAGC- AAAATKQSCCE AGAIGGAVGE IVAGLMPEPA A-NGIEYDVA E-----KLI RNIGKLVSGT VAAYAGYDVN TAANSADTAVSNN  
bau-B3 GFSI-EYVHL KVAHAAGC- AAAATKQSCCE AGAIGGAVGE VAAEYLRKRP VFESVDDALA Y-----KNQI VEVSQIAGA IAIVTGYDVS TAMASADNALKNN  
pit-B2 DPNIFFEYTH KVAHAAGC- AAAATKQSCCE AGAIGGAVGE IVAGLMIPAG K-TALDLDTA E-----RTKI KDTSKLIAGT TAAFAGYDVN TAANSADTAVSNN  
bau-B6 DPNIFFEYTH KVAHAAGC- AAAATKQSCCE AGAIGGAVGE IVAGLMIPAG K-TALDLDTA E-----RTKI KDTSKLIAGT TAAFAGYDVN TAANSADTAVSNN  
bau-A2 NKTDENIHL KVAHAAGC- AGAIQK-QCE SGAIGGAVGE FVAEFMPAAS GNGVYSDEK -----ERV LAVGKILAG VAGITGYDVN VASSANTALLNN  
bau-A1 DPTVIDSLH KVAHAAGC- TGAIQK-QCE AGAIGGAVGE IVAGMIEOPN KDATVEDISK Y-----QEKV INTSKLISGS LASLAGYDAG YAASASLAVSNN  
pit-A3 DPTVIDSLH KVAHAAGC- TGAIQK-QCE AGAIGGAVGE IVAGMIEOPN KDATVEDISK Y-----QEKV INTSKLISGS LASLAGYDAG YAASASLAVSNN

CT domains

2004 2104

|         |             |            |             |             |             |             |            |            |             |             |
|---------|-------------|------------|-------------|-------------|-------------|-------------|------------|------------|-------------|-------------|
| cal-C10 | YLSHAQEKQK  | SQDFKNCNVL | TCGGVTVKWA  | AISAGQDANY  | AVGFAAGIPT  | STAESVVGLA  | QMALSPIQTY | KAIKEVINSE | NALGKISDSI  | KOEYTNRINK  |
| bau-C4  | YLNHVQEKQK  | SOELKDCNVL | TCGGVVVKWA  | AISAGQDANY  | AAGFAVGIPT  | SVAESVVGLA  | KMALSPIQTY | KAIKEVINSE | NALGNISDAI  | KODYTNRINK  |
| pit-C5  | YLNHVQEKQK  | SOELKDCNVL | TCGGVVVKWA  | AISAGQDANY  | AAGFAVGIPT  | SVAESVVGLA  | KMALSPIQTY | KAIKEVINSE | NALGNISDAI  | KODYTNRINK  |
| bau-C3  | RQLNQSEIIK  | IRMLAAGNAN | KEARYNIAAC  | ALVRCAEGYE  | GTTEYAFLLKR | IDDAGNSAEF  | KGERDILVKQ | NFRTPIMGSM | TTNQLFEKS   | SSNFRELNGK  |
| cal-C11 | AFNEKKVKQL  | LEQAKGYMGE | KGGOALDAVS  | RGIAKGDINA  | LKNAQTQIAE  | YLLKKADSGG  | LSQAEWTFG  | TLYALNETLF | PTNILDVIPI  | AGKAIKGNND  |
| pit-C7  | AFNEKKVKEL  | LDOAKGYMGE | KGGOALDAVS  | RGIAKGDINA  | LKNAQTQIAE  | YLLKKADSGG  | LSQAEWTFG  | TLYALNETLF | PTNILDVIPI  | AGKAIKGNND  |
| bau-C1  | AFWVPIIAAV  | MIADRAYSAY | QIYRDVDQV   | DGKKSLEQLA  | IEKGATYVER  | ATLGNLTSKG  | LGIVSEGGKK | VIKRVTYIAP | AKGIAELFTK  | TNSRNLTTA   |
| pit-A4  | SLPKLATSGA  | KIAAKVLDQI | KKWPSNKPLE  | PNDVTFMKFD  | AGVQELIVDVA | NNIKITLVSPT | STWFEKISAA | VDLAVGIDIK | EGKDVALAMK  | DKHIIQLKOP  |
| pit-A5  | WGKVLSSSTGK | AAYKIFKKAT | ELQKAGKNLN  | DTNVWKDILK  | DTATGEYQDM  | LNSFKTAFSA  | GSTPLERTWA | LIDLATGIDK | KDVKIVQDLL  | KDRNTIAKRL  |
| pit-C6  | AFKDKALKLK  | EATRKYLDK  | SKAALDGLIN  | AYKKGDIIEAA | KFKKQLDDSS  | VTTWANSSSS  | YLNIEKTSAL | GEIVIVVSDI | VIPITNYVEIL | PVGKLSKVAK  |
| bau-C2  | AFKDKALKLK  | EATRKYLDK  | SKAALDGLIN  | AYKKGDIIEAA | KFKKQLDDSS  | VTTWANSSSS  | YLNIEKTSAL | GEIVIVVSDI | VIPITNYVEIL | PVGKLSKVAK  |
| nos-C8  | YLTHYSKAKF  | VADLAKCKVT | SSNCDTIION  | YQNLKSTNDL  | ELATVCNNTA  | RSRDCNNMLK  | AALDYAGNDF | NQIYGINSPA | MANLKADQIR  | SRELVLKNIIF |
| pit-B7  | NLGTQQKQOR  | ELEYIKANAL | GDAAI FAKYG | GISVLQDRLT  | GGGFAAGVAA  | GAGSDIWNVY  | KAILSPIDTL | NGLKAIADS  | DVRAQLTOSA  | ITAFNTKIQR  |
| bau-B4  | NLGTQQKQOR  | ELEYIKANAL | GDAAI FAKYG | GISVLQDRLT  | GGGFAAGVAA  | GAGSDIWNVY  | KAILSPIDTL | NGLKAIADS  | DVRAQLTOSA  | ITAFNTKIQR  |
| nos-C9  | AFVSAKVKLE  | GAKRSCTEVG | FAYGSTGCKE  | FLSKKYEMOP  | AKNSALDELQ  | VSEFIFETLE  | DVTPIWGNIK | AFRDAETKTD | YFVAGITVFP  | IAKWNVSGKK  |
| bau-B1  | SLVRLATTTG  | KLVRLTKDQY | NALRKTGQV   | TKDDIVAS-L  | KEQSDAGELIG | IADDLTVFVG  | RSTSPFDRAK | AAIDLVVGTD | LKPGKGESLG  | LAKSELDKDK  |
| pit-B5  | SLVRLATTTG  | KLVRLTKDQY | NALRKTGQV   | TKDDIVAS-L  | KEQSDAGELIG | IADDLTVFVG  | RSTSPFDRAK | AAIDLVVGTD | LKPGKGESLG  | LAKSELDKDK  |
| bau-B3  | VFLAAVPTA   | GEALVGLTLG | AIRTCATNAA  | CVSRAAQGLI  | SVGTAALANS  | IADDLTVFVG  | PASTPFDRAK | AAFDLIIGTD | LKPGKAEESL  | LAQALDKLAK  |
| bau-B2  | TLGKLATTAG  | KAAYRAVKRI | TMPASVRAN   | LKPDVVIKIF  | KEEGVQGVID  | IGDNIKTLIS  | PTSTPGDRAF | AAIDLIGID  | LKAGKNVDIL  | KSEKNIIIGN  |
| pit-B6  | TLGKLATTAG  | KAAYRAVKRI | TMPASVRAN   | LKPDVVIKIF  | KEEGVQGVID  | IGDNIKTLIS  | PTSTPGDRAF | AAIDLIGID  | LKAGKNVDIL  | KSEKNIIIGN  |
| bau-A2  | ALSKTDDVIL  | IQNLKSKCNE | SQCRNEIQKA  | VLKSNYQSN   | AVNLSLLCS   | DNLEQASISY  | NQLRGTIASG | KFGSDNLKLL | NNLLTOSTKD  | ITLQINRLPQ  |
| bau-A1  | YLTSKNYRDL  | KTNYDTCIKG | GSVGVKCSGA  | MIAAAETISK  | TNDTRLRADC  | VNATSNACIN  | GIKDLFEGER | TRNELNKVKN | IFYNSEYSKF  | NSWPKFNLSL  |
| pit-A3  | YLTSKNYRDL  | KTNYDTCIKG | GSVGVKCSGA  | MIAAAETISK  | TNDTRLRADC  | VNATSNACIN  | GIKDLFEGER | TRNELNKVKN | IFYNSEYSKF  | NSWPKFNLSL  |

|         |             |            |             |             |            |            |            |             |             |             |
|---------|-------------|------------|-------------|-------------|------------|------------|------------|-------------|-------------|-------------|
| cal-C10 | LESEYKQAGI  | KGSYNAGLEA | GKLTADVASL  | FAGGAGLAKG  | GVILTEKVAE | KVGYKVLKDP | IVISDKGIPV | TLDGHKIYDP  | QFTPLSTNPR  | ALYRFSDFNH  |
| bau-C4  | LESEYKQAGI  | KGSYNAGLEA | GKLTADVASL  | FAGGAGLAKG  | GVILTEKVAE | KVGYKVLKDP | IVISDKGIPV | TLDGHKIYDP  | QFTPLSTNPR  | ALYRFSDFNH  |
| pit-C5  | LESEYKQAGI  | KGSYNAGLEA | GKLTADVASL  | FAGGAGLAKG  | GVILTEKVAE | KVGYKVLKDP | IVISDKGIPV | TLDGHKIYDP  | QFTPLSTNPR  | ALYRFSDFNH  |
| bau-C3  | YSLIDLRLNDY | QITTRAGGAV | MVVGGGVGLA  | GSTALGSTCV  | TGCVGLVALG | GFVSSADLVM | AGAKQAWSGK | SIDTIGAQVI  | SATTTGLSTSQ | AEMIVGMLSM  |
| cal-C11 | LLGKIRAAAP  | ASASAATARL | GLREDLAKLA  | NIPRNMEIOP  | ANWZKGTJOD | IKYSFEMDGA | VLTLSPPKSG | TSGLAQVYSV  | KNSATGKKEF  | EYHPGGGTHS  |
| pit-C7  | LLGKIRAAAP  | ASASAATARL | GLREDLAKLA  | NIPRNMEIOP  | ANWZKGTJOD | IKYSFEMDGA | VLTLSPPKSG | TSGLAQVYSV  | KNSATGKKEF  | EYHPGGGTHS  |
| bau-C1  | LLGKIRAAAP  | ASASAATARL | GLREDLAKLA  | NIPRNMEIOP  | ANWZKGTJOD | IKYSFEMDGA | VLTLSPPKSG | TSGLAQVYSV  | KNSATGKKEF  | EYHPGGGTHS  |
| pit-A4  | GPIHHICTNK  | NCLSTARGGP | WTRQFQKYFD  | GAGLDINKSV  | ENLVALADHK | PHPKKEYHAY | VEKELRLAVS | GKQANTAEYR  | NAVIATLSRI  | KSEALVSGSQ  |
| pit-A5  | PNIKNGQFFD  | DKKIEELANR | GVQKKIHQID  | VGAKGGWAKQ  | ANGKLEANS  | YLLPNGAAYV | TDNSGNVKEV | TANLRNLIEMD | RNNYQO5IAG  | KSGISGDQGG  |
| pit-C6  | TLKIGEDGTR  | SAGRAELAE  | ELQKVDIKFG  | KTLPGAKAPI  | TVTAESNIGG | KHMFDTNQT  | RPEVNRNTNP | TLAAGNAKID  | PSNPMLTMKN  | AHAELIQR    |
| bau-C2  | TLKIGEDGTR  | SAGRAELAE  | ELQKVDIKFG  | KTLPGAKAPI  | TVTAESNIGG | KHMFDTNQT  | RPEVNRNTNP | TLAAGNAKID  | PSNPMLTMKN  | AHAELIQR    |
| nos-C8  | KDVNNWYGM   | NDIDLRRADF | SAMYAKTGA   | WFRVANETS   | AAIIVGLGAE | AYSAGATFAI | GVISSITSAG | SVNLLDVMNV  | RSEAGYALMK  | AGYNNFKQLY  |
| pit-B7  | LENNYNTGG   | KEATQGVYD  | GLTWVWVGI   | LTWVKGAAITA | TAKMGSAGLK | ITTTIAETAK | QSAKYQAPIT | SIISAAQTOK  | VSDVKTIPV   | VTFNQVLLDP  |
| bau-B4  | LENNYNTGG   | KEATQGVYD  | GLTWVWVGI   | LTWVKGAAITA | TAKMGSAGLK | ITTTIAETAK | QSAKYQAPIT | SIISAAQTOK  | VSDVKTIPV   | VTFNQVLLDP  |
| nos-C9  | AITLILKDG   | EVEAISRAG  | TGYSIYVQV   | GKDIVEMAQ   | GKTVTSTTFK | PGARQTINNI | KGLDKSGNMW | SVNLIIGDGT  | MNKAQOYTVV  | DVSPAGVKTT  |
| bau-B1  | IDRSYQVTVY  | QNRVDVTRN  | RNNGKEFETS  | VASKLGVKRN  | TDRQMITIKT | ERDGOINIIP | DAFGNGGTLV | EFKNVQYLTD  | TQQLRGYAT   | GKPVSLVVMNM |
| pit-B5  | VDQAYTLKVL  | QVKKDVVTRN | RLNGKEFEMS  | AASKLGVKRN  | TDRQMITIKT | ERDGOINIIP | DAFGNGGTLV | EFKNVQYLTD  | TQQLRGYAT   | GKPVSLVVMNM |
| bau-B3  | NWHTKSLKSR  | IAAAYARELR | GSKNFDFYRD  | PKTGDIFIKG  | NQSNMNMKID | ISRFLK*    |            |             |             |             |
| bau-B2  | YSAGLNREIL  | NKAGDFYPNV | PDRLTGRITIS | FPVGDLLKVP  | ELSRVSWGAA | ERGFIOEWF  | KRGYETPRGG | WSEYDIHHIK  | PREFGGTNEF  | WNLTVPQRKT  |
| pit-B6  | YSAGLNREIL  | NKAGDFYPNV | PDRLTGRITIS | FPVGDLLKVP  | ELSRVSWGAA | ERGFIOEWF  | KRGYETPRGG | WSEYDIHHIK  | PREFGGTNEF  | WNLTVPQRKT  |
| bau-A2  | QOAYLNSPWT  | PPTKQMAQI  | VIDILPMTSD  | PSAIYSIITG  | KAVVTEQEV  | RFYAAGVLIL | PITIGRSLTK | AEIAGLKQSS  | QNPLSGTVSI  | KDLPALPKSA  |
| bau-A1  | KADTNIRDLG  | SLYSTFEKID | FWQKTCNGIT  | STAAACQTKYK | QYLDANEATR | VOIAGGLDRV | KSMPIVGNVT | TVGDAVITLI  | TGTSLSNDP   | SRLVALAEIA  |
| pit-A3  | KADTNIRDLG  | SLYSTFEKID | FWQKTCNGIT  | STAAACQTKYK | QYLDANEATR | VOIAGGLDRV | KSMPIVGNVT | TVGDAVITLI  | TGTSLSNDP   | SRLVALAEIA  |

|         |             |            |             |             |            |            |            |             |            |             |
|---------|-------------|------------|-------------|-------------|------------|------------|------------|-------------|------------|-------------|
| cal-C10 | RSTGGDIYFG  | ENIATSYFEV | QAVNGKSLFV  | GOVEVKNMLD  | LTPDKILKQ  | GIDQKCLTEV | APDGYSNVEK | AKKEAIYAYT  | NRIANQAYD  | GYTGIIYNS   |
| bau-C4  | RSTGGDIYFG  | ENIATSYFEV | QAVNGKSLFV  | GOVEVKNMLD  | LTPDKILKQ  | GIDQKCLTEV | APDGYSNVEK | AKKEAIYAYT  | NRIANQAYD  | GYTGIIYNS   |
| pit-C5  | RSTGGDIYFG  | ENIATSYFEV | QAVNGKSLFV  | GOVEVKNMLD  | LTPDKILKQ  | GIDQKCLTEV | APDGYSNVEK | AKKEAIYAYT  | NRIANQAYD  | GYTGIIYNS   |
| bau-C3  | ASVTNSVRTG  | AKQAVQEQRV | LINPKPTITNC | VNGTTCFVAG  | TLTETKNGLK | PZEEFNGL   | VWSRNDLTL  | YGYPVIAIAK  | ITHNQPIFEV | VVQNALKLDK  |
| cal-C11 | KSGDMYKILN  | MNDGTQFRII | DPKSAFNPRY  | ITSNQIYLN   | N-GOKLKYON | KWEIWK*    |            |             |            |             |
| pit-C7  | SDGVRYKIVL  | MNDGTQFRII | DPKSAFNPRY  | ITSNQIYLN   | N-GOKLKYON | KWEIWK*    |            |             |            |             |
| bau-C1  | IEIKFR*     |            |             |             |            |            |            |             |            |             |
| pit-A4  | VNKWLTKK*   |            |             |             |            |            |            |             |            |             |
| pit-A5  | HLIAASLGG   | GDRINLVPM  | KTLNNGSWKA  | MESELANAVK  | LGKDVNMKVA | VGYPTGSSRP | NKFIVTATIN | GKSTNYQFSQ* |            |             |
| pit-C6  | AYDAGLTKGE  | TMQVLRGKE  | VCDHCGQVMK  | TMYSERSGLAK | LIHDTTSGS  | ITTYKVIDA  | KTNIATKIV  | VSPIFGH*    |            |             |
| bau-C2  | AYDAGLTKGE  | TMQVLRGKE  | VCDHCGQVMK  | TMYSERSGLAK | LIHDTTSGS  | ITTYKVIDA  | KTNIATKIV  | VSPIFGH*    |            |             |
| nos-C8  | DGKVTDIVAV  | NISQMQEQK  | LLQPIHEKYF  | KNSKLFVPTQ  | WVPTKFPNPN | VNLLDYNRSV | KYGCIEMGYT | IAQCKP*     |            |             |
| pit-B7  | RLPAPVAGYA  | YKPKVIDSPN | PNIANSHVNG  | YMGELRLANE  | VAAQPNQAVL | KFGDGLTHHG | SDIISVDVKT | GGVYLWDSKY  | RSANSKLGAS | ITFTNSTTRT  |
| bau-B4  | RLPAPVAGYA  | YKPKVIDSPN | PNIANSHVNG  | YMGELRLANE  | VAAQPNQAVL | KFGDGLTHHG | SDIISVDVKT | GGVYLWDSKY  | RSANSKLGAS | ITFTNSTTRT  |
| nos-C9  | KIANIPYDSS  | GLPIFDDIAK | FTTTISAHKA  | ESTQFYASL   | SLWEAIQKQG | VNSSQFTSEQ | LKIQIQAGAS | IKGYTWHHNA  | QSGPNMQLL  | PEVVHNAVKH  |
| bau-B1  | NTKISSETVKN | NILSNKGTIQ | RFDPKQTLH   | PY*         |            |            |            |             |            |             |
| pit-B5  | NTKISSETVKN | NILSNKGTIQ | RFDPKQTLH   | PY*         |            |            |            |             |            |             |
| bau-B2  | HQOEFNSFWR  | NM*        |             |             |            |            |            |             |            |             |
| pit-B6  | HQOEFNSFWR  | NM*        |             |             |            |            |            |             |            |             |
| bau-A2  | QNVFIEQTAQ  | SKYTKLLYEA | KNDPSLGTWS  | TSKIGQKGE   | IAVQLVKGSG | FTDVISIQNA | SGNGIDIIAK | NPQGNVYVLE  | VKTSAVGKIG | SLSKRQEDMN  |
| bau-A1  | SVGITRYIPQ  | VGPVHVHAQP | KYAGORYTTA  | SLTSNKDATI  | NPDTIRAALV | NNRSWLKASY | VPEKVSIAVA | KVETKSGTDN  | ILLAVSGPWN | GNAPTGTGKNT |
| pit-A3  | SVGITRYIPQ  | VGPVHVHAQP | KYAGORYTTA  | SLTSNKDATI  | NPDTIRAALV | NNRSWLKASY | VPEKVSIAVA | KVETKSGTDN  | ILLAVSGPWN | GNAPTGTGKNT |

|         |            |            |            |            |            |            |            |            |                   |           |
|---------|------------|------------|------------|------------|------------|------------|------------|------------|-------------------|-----------|
| cal-C10 | -RNTGSNNR  | AVVLFGGRYD | AAKIKPVLDK | PILKK*     |            |            |            |            |                   |           |
| bau-C4  | SRNTGSSNNR | AVVLFGGRYD | AAKIKPVLDK | PILKK*     |            |            |            |            |                   |           |
| pit-C5  | SRNTGSSNNR | AVVLFGGRYD | AAKIKPVLDK | PILKK*     |            |            |            |            |                   |           |
| bau-C3  | NAIDLDSLVV | TRGQVKQIAK | NGDPLGGERE | TFKTTTEHPF | WVKNIGWQKA | SILSEGMTLL | DRSNMELTVI | SQKLLAKLDT | VYNIIEVKDYH       | TYHVGKLGW |
| pit-B7  | NAVNEALTTI | RQSNLPESVK | QVALKNLNDG | TFTTYTVATG | NSKNSVIFSC | VNKVCK*    |            |            |                   |           |
| bau-B4  | NAVNEALTTI | RQSNLPESVK | QVALKNLNDG | TFTTYTVATG | NSKNSVIFSC | VNKVCK*    |            |            |                   |           |
| nos-C9  | IGEDSLKKG  | IIK*       |            |            |            |            |            |            |                   |           |
| bau-A2  | FFVNDILTNA | AAKTGRYVNI | SDTVNAQAQI | MLTKYKQKQA | VGNIYGAAGI | VDLKNAQILI | SSWTNK*    |            |                   |           |
| bau-A1  | DVINGVYKYK | VVTDSHSVQ  | PIITYVDKNG | KPITNNNHAE | AKLFSYIKDS | YSSTPSKVTM | SIQNTASEPA | GMCNGLFSSG | KYFTNEVPFM        | RLSIFHG*  |
| pit-A3  | DVINGVYKYK | VVTDSHSVQ  | PIITYVDKNG | KPITNNNHAE | AKLFSYIKDS | YSSTPSKVTM | SIQNTASEPA | GMCNGLFSSG | KYFTNEVPFM        | RLSIFHG*  |
| bau-C3  | VHNAQCDDLI | YQIVKETYK  | GVISNRVKTE | ALFENVVKEQ | GKVLVSGGKY | GSNNGYDHI  | IFKDAQGNTN | LTMVVDKQLG | QKGIKLDPKAAGNMQMS |           |
| bau-C3  | SEWRAVLAK  | LDPNSEAYKA | VFAARQNGTL | VKGAAYVDKS | AEKLMVLRID | PATKK*     |            |            |                   |           |

Supplementary file 5. A) HET regions (blu residues)

|         |                   |                                                                                                                                                                      |                 |
|---------|-------------------|----------------------------------------------------------------------------------------------------------------------------------------------------------------------|-----------------|
| bau-A1  | <b>GDISLNSKKE</b> | TLNSINVMGKFTTESYGDPSYEFELFKNNPEYKXKLDLNLHYIYLTRYGVSGKAGQKRIDYANNEINNAEKEIWNLNNTYGVTLNRYKLLFSEYAVILGKKRNFYFEDFKQVNEIDYSDLNF                                           | SGYLHRGVDLSDG   |
| pit-A3  | <b>GDIGFNSKXV</b> | TLDDVNMVWGFTEYTDPSYEFELFKNNPEYKXKLDLNLHYIYLTRYGVSGKAGQKRIDYANNEINNAEKEIWNLNNTYGVTLNRYKLLFSEYAVILGKKRNFYFEDFKQVNEIDYSDLNF                                             | SGYLHRGVDLSDG   |
| bau-A2  | <b>VKMYAGDLKN</b> | TSNTAPINIIISTGDIVLDAMNYDNIIGQLDMLPAQKLRDELEASGKDSVTLNTINQLNEEIAFYLSRSL                                                                                               | NGTRRSQSSHDSAQ  |
| pit-A4  | <b>DDVLDGVKN</b>  | NFSSLQKLNLAADYTLKEEHNKERLKSQDYFNDSYSLVKKRYNNDHFLKYWDYELLDQTKNNSEIWNAYKEYERDFNVFKDKYPIKINYPVPGQLPFL-LGQWNTPLAVDYVFGFKYDNDYINDVEKNELFYKESL                             | NGSEHAETKLTSSK  |
| pit-A5  | <b>DDVLDGVKN</b>  | SFINRKKQKLNENLKNKINISDLALKSQDFFDYDNYMVTAYEDYTSNYDYSLYMKHYNLNDYFISKYPVPRNPRLLIFGSDKPLFHSIFSEPRMTRFDALYSFEPKYDENYLRSLQAEVDFYNTGI                                       | NGSEHAETKLTSSK  |
| bau-B1  | <b>GDVVTSGVKN</b> | TAVDYVTQKRIOEIGIELSALDAQIERYKQDQANYKAQTFESHVQQRNIMSQGLEMLTKGKAIEHSYAEILPWT                                                                                           | KAAAITGTGTPYWA  |
| bau-B4  | <b>EDVLDGVKN</b>  | KFTNFIASIKHIASLNQNLADLNKINIKNDPSYLSKDKDIASLGSQASQINQLNDALSAYTSGVDPLNASIGYDSENGNYIYVSMDDGGRAYFVSIPLGLDLSRYRQIILNELPAENQKLNFNKTIATFEQDKARVNTIIFMNNKT                   | NGYEHAEKLTSSKA  |
| pit-B7  | <b>EDVLDGVKN</b>  | KFTNFIASIKHIASLNQNLADLNKINIKNDPSYLSKDKDIASLGSQASQINQLNDALSAYTSGVDPLNASIGYDSENGNYIYVSMDDGGRAYFVSIPLGLDLSRYRQIILNELPAENQKLNFNKTIATFEQDKARVNTIIFMNNKT                   | NGYEHAEKLTSSKA  |
| pit-B5  | <b>GDINIDGINK</b> | NFNMYASKKYSSELFEKIFNLTMILSNTESLKYSASRISQMQEELADLKDASTFLENGTG                                                                                                         | FEHAETVLRITSLGD |
| bau-C1  | <b>DEVLTDGINK</b> | SLKEVVSLEYKTELDELKDLNNSLKEESELINKARYNDYKSELDSILEKRKKIEQMMKLPFTKGVGQKLDDEITIMONNLEEKYPEINGPSNKLKVIKIDVEANISFFKNSI                                                     | NGSEHTETKLTSSK  |
| bau-C3  | <b>DDVLDGVKN</b>  | TLNQSSSTKYLNLEIVKTDLQKENDKLAADPEYIQLLDLKKRLHSGNELGFNVSEAKKLAESLERKYLKIEISGTTNGPMLPQLGANVLGKITLILYQEIINDIDKAITLYSQSL                                                  | TGYEHAQDILRSNW  |
| bau-C4  | <b>DDVLDGVKN</b>  | SFSNIKFPDKANREKIVQDFIQELNALKATQEYLNQYQALKDANDQIKAGEDMMRTAQSIALTAKRLKDEGERKLAQVNETYKTLITNLNGLQRNIDQSGANISFYEQNL                                                       | KGQOHSWIKSID    |
| cal-C10 | <b>DDVLDGVKN</b>  | SFSNIKFPDKANREKIVQDFIQELNALKATQEYLNQYQALKDANDQIKAGEDMMRTAQSIALTAKRLKDEGERKLAQVNETYKTLITNLNGLQRNIDQSGANISFYEQNL                                                       | KGQOHSWIKSSG    |
| pit-C5  | <b>DDVLDGVKN</b>  | SFAKRKKEEFTEANLNKNSLSSLDLKKQDFFDYDNYMVTAYEDYASNYDYTYLVKHYNLKDFISKYPVPRNPRLLIFGSDVPLFHSIIAVPQRSRFDALYSFEPKYDENYLRSLQAEVDFYNTGI                                        | NGSEHAETKLTSSK  |
| pit-C7  | <b>EDVLDGVKN</b>  | NITNKISISK-LEYSKELNININIIQDFKQDENKLYKNSIDNININSINSKRKWERAVSDLLHKKRALSDQLKLEEREDIRNFKFDIIDQENLNLDERNWYFYFDSNV                                                         | SGSEHSEAKLTSSK  |
| cal-C11 | <b>DDVLDGVKN</b>  | SLENIASLKYKEDFKELEYSRAVLEKEEINLVNKPRYNDYKNELEDEILKGRKKIEEMMKYSLTRSVGQKLLQESINKQNLLEEKYPEINGLSNKIKLSIODIEDNLKYFEFV                                                    | NGSEHSEVNFSAIS  |
| nos-C8  | <b>DDVLDGVKN</b>  | TLNINSADSKNLIENIKKEIDNSINILSNSKEFQERKTLIDNIKTKNSLEAAISYLFDSNGEYSAGALSNDVSNIFFYENAYIQSFSSEGASDYAMVINND-----IVGFLPSVDISGTLSSYKAEIKKYKLNESKVKDQKLSKLESQKSEIKSKELLTKGV   | NGSEHTETKLTSSK  |
| bau-C5  | <b>DDVLDGVKN</b>  | TLNINSADSKNLIENIKKEIDNSINILSNSKEFQERKTLIDNIKTKNSLEAAISYLFDSNGEYSAGALSNDVSNIFFYENAYIQSFSSEGASDYAMVINND-----IVGFLPSVGSIGTLSSYKAEIKKYKLNESAKVQLEKLSKLEAEKQSEIKSKELLTTGV | SGSEHTETKLTSSK  |
| nos-C9  | <b>DDVLDGVKN</b>  | ILNRTADTKNIIENIKKEIDNSINILSNSKEFQERKTLIDNIKTKNSLEAAISYLFDSNGEYSAGALSNDVSNIFFYENAYIQSFSSEGASDYIIVIPGTSYQIQGFLPSLGYVEVLLNSYKTEIKKYKLNESKAIKQDLESMINKLQSQKIELKTEFLASNI  | NGEHAEANLTSKS   |
| bau-B3  | <b>GDIKTEGVKN</b> | TFNNSYSKHSDYLFKQRLYYENKIQEINRLGVLNLAQKLVAAQYTEEINDITQINFLSLGT                                                                                                        | NGEHAESLLRSET   |
| pit-B7  | <b>EDVLDGVKN</b>  | KFTNFIASIKHIASLNQNLADLNKINIKNDPSYLSKDKDIASLGSQASQINQLNDALSAYTSGVDPLNASIGYDSENGNYIYVSMDDGGRAYFVSIPLGLDLSRYRQIILNELPAENQKLNFNKTIATFEQDKARVNTIIFMNNKT                   | NGYEHAKSTLTSSKA |
| bau-C2  | <b>DDVLDGVKN</b>  | KFSGLQKLNLAQDYSLELDRLNKERLKSQDYFNDSYSLVKKRYNNDHFLKYWDYELLDQTKNNSEIWNAYKEYERDFNVFKDKYPIKINYPVPGQLPFL-LGQWNTPLAVDYVFGFKYDNDYINDVEKNELFYKESL                            | NGSEHSETKLTSSKN |
| bau-B2  | <b>GDVLDGVKN</b>  | KVNGVSKKQDLINSQDQDEKKNFIANTI                                                                                                                                         | TGVENFNSLSTNT   |
| pit-B6  | <b>GDVLDGVKN</b>  | KVNGVSKKQDLINSQDQDEKKNFIANTI                                                                                                                                         | TGVENFNSLSTNT   |
| pit-C6  | <b>GDVLDGVKN</b>  | TIINQHTDEYKAKIILDEETIKLQKSSDYEAIIAFFMKEALKYARISSGELIEGSPMDRELQKALQKTKTEFPEYVSKYGLRDKQDFYSEMIKLFNVGV                                                                  | NGEYHSGSITSNIT  |
| pit-n1  | <b>DDVLDGVKN</b>  | TILDSTKITSFERLAAVTSEKIDLEIQHEKMRKDPDYFLINELDKGRGLKYEDKVDKMYALRDALEKRYLVKIDIEAGAGRRGKVFDDAYEKYTKISELQDSINFYNNKF                                                       | TGNEHRGSSFTSKIT |
| pit-n2  | <b>DDVLDGVKN</b>  | SLKQLQSKYQNSIDDPFNWIKTLESKTSSEYQAYTKDGTMSRGRYQALVEFSGNHDFAMHLEESNKIEKNSKYSTLLEAELEKNSLDAEILKQMFDSNV                                                                  | EGSEHAETKLTSSK  |







1921 2848  
pit-A5/C8 DVTVASOSAS TAIENN---- WGVLSSTGK AAYKIFKKAT E-LQKAGKLN NDTNWKDIL KDTATGEYQD MLNSFKTAFS AGSTPLERTW ALIDLATGID KKDVKIVQDL LKDRNTIAKR  
pit-A5 DVTVASOSAS TAIENN---- WGVLSSTGK AAYKIFKKAT E-LQKAGKLN NDTNWKDIL KDTATGEYQD MLNSFKTAFS AGSTPLERTW ALIDLATGID KKDVKIVQDL LKDRNTIAKR  
pit-A5/A4 DVTVASOSAS TAIENN---- WGVLSSTGK AAYKIFKKAT E-LQKAGKLN NDTNWKDIL KDTATGEYQD MLNSFKTAFS AGSTPLERTW ALIDLATGID KKDVKIVQDL LKDRNTIAKR  
pit-A5/Hn2 DVTVASOSAS TAIENN---- WGVLSSTGK AAYKIFKKAT E-LQKAGKLN NDTNWKDIL KDTATGEYQD MLNSFKTAFS AGSTPLERTW ALIDLATGID KKDVKIVQDL LKDRNTIAKR  
pit-A5/Hn1 DVTVASOSAS TAIENN---- WGVLSSTGK AAYKIFKKAT E-LQKAGKLN NDTNWKDIL KDTATGEYQD MLNSFKTAFS AGSTPLERTW ALIDLATGID KKDVKIVQDL LKDRNTIAKR  
pit-A5/C7 DVTVASOSAS TAIENN--N WGVLSSTGK AAYKIFKKAT E-LQKAGKLN NDTNWKDIL KDDMC  
nos-C8 DVNTAANSAD IAIQNNYLTH YSKAKFVADL AKCKVTSSNC DTIIQNYQNL SKTNDLELAT VCNNTARSRD CNNMLKAALD YAGNDFNQIY GINSPAMA-- ----NLKADQ IRSRELVLN  
pit-A4 DVNTAANSAD TAIENN--S LPKLATSGAK IAKKVLDDQIK K--WPSNKP L EPNQ--VTKHF KDAGVQEIVD VANNIKTLVS PTTWTFEKIS AAVDLAVGID IKAGKDVALA MKDKHILQIK  
pit-C7 DVNTAANSAN IALTN--A FNE-----K KVKELLDQAK G--YMGKGG QALDAVSRGI AKGDINALKK AQTQIAEYLL KKADSGGLSQ AEWVTFGLY ALNETLFPIN ILDVIPGAGK  
2841  
pit-A5/C8 LPNIKNGOFF DDKKIEELAN RGDVKKIHOI DVGAGGGWAK QANGKLEANS AYLLPNGA-- AYVTNSGNV KEVTANLRNI LMDRNNYQOS IAGKSGISGD QGGHL-IAAS LGGSGDRINL  
pit-A5 LPNIKNGOFF DDKKIEELAN RGDVKKIHOI DVGAGGGWAK QANGKLEANS AYLLPNGA-- AYVTNSGNV KEVTANLRNI LMDRNNYQOS IAGKSGISGD QGGHL-IAAS LGGSGDRINL  
pit-A5/A4 LPNIKNGOFF DDKKIEELAN RGDVKKIHOI DVGAGGGWAK QANGKLEANS AYLLPNGA-- AYVTNSGNV KEVTANLRNI LMDRNNYQOS IAGKSGISGD QGGHL-IAAS LGGSGDRINL  
pit-A5/Hn2 LPNIKNGOFF DDKKIEELAN RGDVKKIHOI DVGAGGGWAK QANGKLEANS AYLLPNGA-- AYVTNSGNV KEVTANLRNI LMDRNNYQOS IAGKSGISGD QGGHL-IAAS LGGSGDRINL  
pit-A5/Hn1 LPNIKNGOFF DDKKIEELAN RGDVKKIHOI DVGAGGGWAK QANGKLEANS AYLLPNGA-- AYVTNSGNV KEVTANLRNI LMDRNNYQOS IAGKSGISGD QGGHL-IAAS LGGSGDRINL  
nos-C8 IPKQVNNWY-- --QINDIDL RADFFSAMYA KTGAE--WFR VANETSRAAI VGLGAEAYS GATFALGVVI SSIISAGSVN LLDVYNRSE AGYALMKAGY NNFQK-LYDG KVTIDIVANNI  
pit-A4 DPGTHICT IRNCLSTARG GPWTRPQKY FDGAGL-DIN KSVENI VALA DNGGPHRKEY HAYVEKELRL AVSQQANTIA EYR-NAVIAT LSRIKSEALV SSSQNKWLT KK  
pit-C7 AIGKNDLLK GIRAAAPASA ASATARLGLR EDLAKLANIP RMEIOPANI WGMTI00IKY SFEMDGAULT LVPPKSSSTSG LAQVYSWNS ATGIKEFEVH PGGGTHSSDG VRYYKIVMND  
2161 2215  
pit-A5/C8 VPMAKTLNNG SWKAMESELA NAVKLGKDW MKVAVGYPTG SSRPNKFIVT ATINGKSTNY QF50  
pit-A5 VPMAKTLNNG SWKAMESELA NAVKLGKDW MKVAVGYPTG SSRPNKFIVT ATINGKSTNY QF50  
pit-A5/A4 VPMAKTLNNG SWKAMESELA NAVKLGKDW MKVAVGYPTG SSRPNKFIVT ATINGKSTNY QF50  
pit-A5/Hn2 VPMAKTLNNG SWKAMESELA NAVKLGKDW MKVAVGYPTG SSRPNKFIVT ATINGKSTNY QF50  
pit-A5/Hn1 VPMAKTLNNG SWKAMESELA NAVKLGKDW MKVAVGYPTG SSRPNKFIVT ATINGKSTNY QF50  
nos-C8 SQWDEKLL QPIHEKVFYN SKLFPQTMV PTKFPMNPM LLDYNSRVKY GCIEHGYTIA QGCRP  
pit-C7 GTQRLIDPN KGRKPGTITS NQIYLNPGQ KLYENKWE LMK

C) CdiA chimerae

Strains: B3/B5, TCM292; B5, CIP 70.29;

120  
83/B5 MNKLYRIVF NKARMFMAV AENVRSOSKA AGOSTS5EIE RSGOS5GQEK SFHQLHWKKA LVASISLLVP FAPYAAIYA DSAMAANRA VIGAGKNSAG VTPVPVNIQT PKNGISHNIT  
85 MNKLYRIVF NKARMFMAV AENVRSOSKA AGOSTS5EIV SSGOS5LVEQK SFHQLHWKKA LVASISLLVP FAPYAAIYA DSAMAANRA VIGAGKNSAG VTPVPVNIQT PKNGISHNIT  
87/B5 MNKLYRIVF NKARMFMAV AENVRSOSKA AGOSTS5EIV SSGOS5LVEQK SFHQLHWKKA LVASISLLVP FAPYAAIYA DSAMAANRA VIGAGKNSAG VTPVPVNIQT PKNGISHNIT  
87 MNKLYRIVF NKARMFMAV AENVRSOSKA AGOSTS5EIE RSGOS5GQEK SFHQLHWKKA LVASISLLVP FAPYAAIYA DSAMAANRA VIGAGKNSAG VTPVPVNIQT PKNGISHNIT  
83 MNKLYRIVF NKARMFMAV AENVRSOSKA AGOSTS5EIV SSGOS5LVEQK SFHQLHWKKA LVASISLLVP FAPYAAIYA DSAMAANRA VIGAGKNSAG VTPVPVNIQT PKNGISHNIT

240  
83/B5 KQFDVLAEGA VLNSRRTGAT TKTVGAVGAM PFLATGEARV ILEUWNSTAA SRFEGNLEVA GQMDVVIAN PSGINIKGGG FINANKALFT TGPQLNADG SIQGFNU5GQ KVITITAPTN5  
85 KQFDVLAEGA VLNSRRTGAT TKTVGAVGAM PFLATGEARV ILEUWNSTAA SRFEGNLEVA GQMDVVIAN PSGINIKGGG FINANKALFT TGPQLNADG SIQGFNU5GQ KVITITAPTN5  
87/B5 KQFDVLAEGA VLNSRRTGAT TKTVGAVGAM PFLATGEARV ILEUWNSTAA SRFEGNLEVA GQMDVVIAN PSGINIKGGG FINANKALFT TGPQLNADG SIQGFNU5GQ KVITITAPTN5  
87 KQFDVLAEGA VLNSRRTGAT TKTVGAVGAM PFLATGEARV ILEUWNSTAA SRFEGNLEVA GQMDVVIAN PSGINIKGGG FINANKALFT TGPQLNADG SIQGFNU5GQ KVITITAPTN5  
83 KQFDVLAEGA VLNSRRTGAT TKTVGAVGAM PFLATGEARV ILEUWNS5AA SRFEGNLEVA GQMDVVIAN PSGINIKGGG FINANKALFT TGPQLNADG SIQGFNU5GQ KVITITAPTN5

360  
83/B5 TFLGQGNNN ANVDYIARA LDNLAKLQAT NDIQVITGAN TVSSDLKNTA SITGTGAVPT LAVDVKALGG MYANNIYLMG TEKGLGVYNA GTIQAVSNLV ITSAGKIEHS GTISSTSKTO  
85 TFLGQGNNN ANVDYIARA LELSAELRAK NDIQVITGAN TVSSADLDQVT AKTGTGTAPT LAVDVKALGG MYANNIYLMG TEKGLGVYNA GTIQAVSNLV ITSAGKIEHS GTISSTSKTO  
87/B5 TFLGQGNNN ANVDYIARA LDNLAKLQAT NDIQVITGAN TVSSDLKNTA PISGAGTAPT LAIDVKALGG MYANNIYLMG TEKGLGVYNA GTIQAVSNLV ITSAGKIEHS GTISSTSKTO  
87 TFLGQGNNN ANVDYIARA LELSAELRAK NDIQVITGAN TVSSADLDQVT AKTGTGTAPA LAVDVKALGG MYANNIYLMG TEKGLGVYNA GTIQAVSNLV ITSAGKIEHS GTISSTSKTO  
83 TFLGQGNNN ANVDYIARA LELSAELRAK NDIQVITGAN TVSSADLDQVT AKTGTGTAPA LAVDVKALGG MYANNIYLMG TEKGLGVYNA GTIQAVSNLV ITSAGKIEHS GTISSTSKTO

480  
83/B5 GLVS5VTTGQ VAAADINS5G SINSNMLNI DSGNLDLNNVA KEIINNLSL AASPLIISK GNUNLAANSR IFNDAOSGEL YVEADLNLA TNAGITSNRG SAYIOSQKDI VAAQGAKLIA  
85 GLVS5VTTGQ VAAADINS5G SINSNMLNI DSGNLDLNNVA KEIINNLSL AASPLIISK GNUNLAANSR IFNDAOSGEL YVEADLNLA TNAGITSNRG SAYIOSQKDI VAAQGAKLIA  
87/B5 GLVS5VTTGQ VAAADINS5G SINSNMLNI DSGNLDLNNVA KEIINNLSL AASPLIISK GNUNLAANSR IFNDAOSGEL YVEADLNLA TNAGITSNRG SAYIOSQKDI VAAQGAKLIA  
87 GLVS5VTTGQ VAAADINS5G SINSNMLNI DSGNLDLNNVA KEIINNLSL AASPLIISK GNUNLAANSR IFNDAOSGEL YVEADLNLA TNAGITSNRG SAYIOSQKDI VAAQGAKLIA  
83 GLVS5VTTGQ VAAADINS5G SINSNMLNI DSGNLDLNNVA KEIINNLSL AASPLIISK GNUNLAANSR IFNDAOSGEL YVEADLNLA TNAGITSNRG SAYIOSQKDI VAAQGAKLIA

680  
83/B5 AQNLVNSGK KLSLNGNTO ASLGSINLQA DSSNTDGLD IGGTGYTAGK DLNLYSSGVD NLQNLGFSL NSATRVKINI AHSGRNLVWV NATKVLPOIT GKVALDAENI L5ISAQGV5N  
85 AQNLVNSGK KLSLNGNTO ASLGSINLQA DSSNTDGLD IGGTGYTAGK DLNLYSSGVD NLQNLGFSL NSATRVKINI AHSGRNLVWV NATKVLPOIT GKVALDAENI L5ISAQGV5N  
87/B5 AQNLVNSGK KLSLNGNTO ASLGSINLQA DSSNTDGLD IGGTGYTAGK DLNLYSSGVD NLQNLGFSL NSATRVKINI AHSGRNLVWV NATKVLPOIT GKVALDAENI L5ISAQGV5N  
87 AQNLVNSGK KLSLNGNTO ASLGSINLQA DSSNTDGLD IGGTGYTAGK DLNLYSSGVD NLQNLGFSL NSATRVKINI AHSGRNLVWV NATKVLPOIT GKVALDAENI L5ISAQGV5N  
83 AQNLVNSGK KLSLNGNTO ASLGSINLQA DSSNTDGLD IGGTGYTAGK DLNLYSSGVD NLQNLGFSL NSATRVKINI AHSGRNLVWV NATKVLPOIT GKVALDAENI L5ISAQGV5N

720  
83/B5 KDSIQLQAGQ LTLNFT5G KDNLITLETA DFLFNVLNVA ONDIKISALT GGITANSKKA NSMAGKISIL ATRNLVLSL QEIESAFWAD QDQATDMTF INGNKGVTLG SIDDGWQLK  
85 KDSIQLQAGQ LTLNFT5G KDNLITLETA DFLFNVLNVA ONDIKISALT GGITANSKKA NSMAGKISIL ATRNLVLSL QEIESAFWAD QDQATDMTF INGNKGVTLG SIDDGWQLK  
87/B5 KDSIQLQAGQ LTLNFT5G KDNLITLETA DFLFNVLNVA ONDIKISALT GGITANSKKA NSMAGKISIL ATRNLVLSL QEIESAFWAD QDQATDMTF INGNKGVTLG SIDDGWQLK  
87 KDSIQLQAGQ LTLNFT5G KDNLITLETA DFLFNVLNVA ONDIKISALT GGITANSKKA NSMAGKISIL ATRNLVLSL QEIESAFWAD QDQATDMTF INGNKGVTLG SIDDGWQLK  
83 KDSIQLQAGQ LTLNFT5G KDNLITLETA DFLFNVLNVA ONDIKISALT GGITANSKKA NSMAGKISIL ATRNLVLSL QEIESAFWAD QDQATDMTF INGNKGVTLG SIDDGWQLK

840  
83/B5 STRTAEQGD IQLIAGNCS LOANTDVTIR GQHGVDIRK NILQOSLQI QNKKADVVID NTLTTSVGG LSINSEKGT LSINSELSKG NTELSAKDHL TLQNEANAD KHMALS5KKN  
85 STRTAEQGD IQLIAGNCS LOANTDVTIR GQHGVDIRK NILQOSLQI QNKKADVVID NTLTTSVGG LSINSEKGT LSINSELSKG NTELSAKDHL TLQNEANAD KHMALS5KKN  
87/B5 STRTAEQGD IQLIAGNCS LOANTDVTIR GQHGVDIRK NILQOSLQI QNKKADVVID NTLTTSVGG LSINSEKGT LSINSELSKG NTELSAKDHL TLQNEANAD KHMALS5KKN  
87 STRTAEQGD IQLIAGNCS LOANTDVTIR GQHGVDIRK NILQOSLQI QNKKADVVID NTLTTSVGG LSINSEKGT LSINSELSKG NTELSAKDHL TLQNEANAD KHMALS5KKN  
83 STRTAEQGD IQLIAGNCS LOANTDVTIR GQHGVDIRK NILQOSLQI QNKKADVVID NTLTTSVGG LSINSEKGT LSINSELSKG NTELSAKDHL TLQNEANAD KHMALS5KKN

960  
83/B5 IYVINGEYV ---ITTLKPKNI QSKLTSQSL SMIGASHAA QNTTYTGGAT LLEAGWVLT PSNATLSF--- ---NAVDA FLRIDPALKD LINGOLTIQNT GTLSLDPKH KLSAAGLEL  
85 IYVINGEYV ---ITTLKPKNI QSKLTSQSL SMIGASHAA QNTTYTGGAT LLEAGWVLT PSNATLSF--- ---NAVDA FLRIDPALKD LINGOLTIQNT GTLSLDPKH KLSAAGLEL  
87/B5 IYVINGEYV ---ITTLKPKNI QSKLTSQSL SMIGASHAA QNTTYTGGAT LLEAGWVLT PSNATLSF--- ---NAVDA FLRIDPALKD LINGOLTIQNT GTLSLDPKH KLSAAGLEL  
87 IYVINGEYV ---ITTLKPKNI QSKLTSQSL SMIGASHAA QNTTYTGGAT LLEAGWVLT PSNATLSF--- ---NAVDA FLRIDPALKD LINGOLTIQNT GTLSLDPKH KLSAAGLEL  
83 IYVINGEYV ---ITTLKPKNI QSKLTSQSL SMIGASHAA QNTTYTGGAT LLEAGWVLT PSNATLSF--- ---NAVDA FLRIDPALKD LINGOLTIQNT GTLSLDPKH KLSAAGLEL

1080  
83/B5 ISKNGKLLSLL GYGTNGNFS ETIFMIVH--- GCSHLEGNK VETQAGAGRS IKDFKIVAPD GDIKIEGVNV TRNYSYAKH ALDLAHQRLY YENRIQALNS LGLTLA00K  
85 ISKNGKLLSLL GYGTNGNFS ETIFMIVH--- GCSHLEGNK VETQAGAGRS IKDFKIVAPD GDIKIEGVNV TRNYSYAKH ALDLAHQRLY YENRIQALNS LGLTLA00K  
87/B5 ISKNGKLLSLL GYGTNGNFS ETIFMIVH--- GCSHLEGNK VETQAGAGRS IKDFKIVAPD GDIKIEGVNV TRNYSYAKH ALDLAHQRLY YENRIQALNS LGLTLA00K  
87 ISKNGKLLSLL GYGTNGNFS ETIFMIVH--- GCSHLEGNK VETQAGAGRS IKDFKIVAPD GDIKIEGVNV TRNYSYAKH ALDLAHQRLY YENRIQALNS LGLTLA00K  
83 ISKNGKLLSLL GYGTNGNFS ETIFMIVH--- GCSHLEGNK VETQAGAGRS IKDFKIVAPD GDIKIEGVNV TRNYSYAKH ALDLAHQRLY YENRIQALNS LGLTLA00K

1200  
83/B5 -----LVA OYTEEINDIT QOQNFRLSGT NGAEHKGSLL TSETGK---VN  
85 -----LVA OYTEEINDIT QOQNFRLSGT NGAEHKGSLL TSETGK---VN  
87/B5 INQLNDALS AYTS5GVDPLN ASIGYDENG NIYV5SNDG GRAYFV5PSI GDLTRYRQI VLNELPAENO KLNFNKINI AFEQDKARIN QITFNNKKT NGYEAHSTL TSAQAN---IS  
87 INQLNDALS AYTS5GVDPLN ASIGYDENG NIYV5SNDG GRAYFV5PSI GDLTRYRQI VLNELPAENO KLNFNKINI AFEQDKARIN QITFNNKKT NGYEAHSTL TSAQAN---IS  
83 INQLNDALS AYTS5GVDPLN ASIGYDENG NIYV5SNDG GRAYFV5PSI GDLTRYRQI VLNELPAENO -----LVA OYTEEINDIT KQINFSLGT NGAEHKGSLL RSETGK---VN

1320  
83/B5 LVSQKIMIT GADIRA-VQG EWNISQDIEG EKVYS5TALD KNGQ-PHIMN AGAIIAAND FYDRNETDQ NYQATSLTPT TLVEGRGRWN IKTTGTQEGS HLVLQAVGIS S5NGDVKIES  
85 LVSQKIMIT GADIRA-VQG EWNISQDIEG EKVYS5TALD KNGQ-PHIMN AGAIIAAND FYDRNETDQ NYQATSLTPT TLVEGRGRWN IKTTGTQEGS HLVLQAVGIS S5NGDVKIES  
87/B5 LVSQKIMIT GADIRA-VQG EWNISQDIEG EKVYS5TALD KNGQ-PHIMN AGAIIAAND FYDRNETDQ NYQATSLTPT TLVEGRGRWN IKTTGTQEGS HLVLQAVGIS S5NGDVKIES  
87 LVSQKIMIT GADIRA-VQG EWNISQDIEG EKVYS5TALD KNGQ-PHIMN AGAIIAAND FYDRNETDQ NYQATSLTPT TLVEGRGRWN IKTTGTQEGS HLVLQAVGIS S5NGDVKIES  
83 LVSQKIMIT GADIRA-VQG EWNISQDIEG EKVYS5TALD KNGQ-PHIMN AGAIIAAND FYDRNETDQ NYQATSLTPT TLVEGRGRWN IKTTGTQEGS HLVLQAVGIS S5NGDVKIES

1440  
83/B5 KNMLFDVAL EQ5YDRSTV EKK5S5GGLK KKTITTFP5N ESSRPASVDI SGNIIYIESK EL-----N KNHNDIY5G QPIAEGDQVF TRSGDGLYFN TWNEISKNOL E1NKK5S5ILG  
85 KNMLFDVAL EQ5YDRSTV EKK5S5GGLK KKTITTFP5N ESSRPASVDI SGNIIYIESK EL-----N KNHNDIY5G QPIAEGDQVF TRSGDGLYFN TWNEISKNOL E1NKK5S5ILG  
87/B5 KNMLFDVAL EQ5YDRSTV EKK5S5GGLK KKTITTFP5N ESSRPASVDI SGNIIYIESK EL-----N KNHNDIY5G QPIAEGDQVF TRSGDGLYFN TWNEISKNOL E1NKK5S5ILG  
87 KNMLFDVAL EQ5YDRSTV EKK5S5GGLK KKTITTFP5N ESSRPASVDI SGNIIYIESK EL-----N KNHNDIY5G QPIAEGDQVF TRSGDGLYFN TWNEISKNOL E1NKK5S5ILG  
83 KNMLFDVAL EQ5YDRSTV EKK5S5GGLK KKTITTFP5N ESSRPASVDI SGNIIYIESK EL-----N KNHNDIY5G QPIAEGDQVF TRSGDGLYFN TWNEISKNOL E1NKK5S5ILG

1560  
83/B5 IKYNTSKNS SYQVVTQPS TAAAYITCK SFDTHLAGT ERYNLEKATI E5GKIFLEP SVTSINNTIK KENS5VWDS MQDKGSITET AKLPSFNGPT PPIFAKAGGL SVOIP5EKD  
85 IKYNTSKNS SYQVVTQPS TAAAYITCK SFDTHLAGT ERYNLEKATI E5GKIFLEP SVTSINNTIK KENS5VWDS MQDKGSITET AKLPSFNGPT PPIFAKAGGL SVOIP5EKD  
87/B5 IKYNTSKNS SYQVVTQPS TAAAYITCK SFDTHLAGT ERYNLEKATI E5GKIFLEP SVTSINNTIK KENS5VWDS MQDKGSITET AKLPSFNGPT PPIFAKAGGL SVOIP5EKD  
87 IKYNTSKNS SYQVVTQPS TAAAYITCK SFDTHLAGT ERYNLEKATI E5GKIFLEP SVTSINNTIK KENS5VWDS MQDKGSITET AKLPSFNGPT PPIFAKAGGL SVOIP5EKD  
83 IKYNTSKNS SYQVVTQPS TAAAYITCK SFDTHLAGT ERYNLEKATI E5GKIFLEP SVTSINNTIK KENS5VWDS MQDKGSITET AKLPSFNGPT PPIFAKAGGL SVOIP5EKD

|-----switch region-----|

1680  
83/B5 ANKVLRLDEI LKLANOPGNT YLKDVLNRND VDWQVLLTO KMDYK5GGL TGAGAAALVI IVTIATMGTG TAAAAGAAAG TAASGTTV---G L6ASMLG-TA GVTTTAAAGAI  
85 ANKVLRLDEI LKLANOPGNT YLKDVLNRND VDWQVLLTO KMDYK5GGL TGAGAAALVI IVTIATMGTG TAAAAGAAAG TAASGTTV---G L6ASMLG-TA GVTTTAAAGAI  
87/B5 ANKVLRLDEI LKLANOPGNT YLKDVLNRND VDWQVLLTO KMDYK5GGL TGAGAAALVI IVTIATMGTG TAAAAGAAAG TAASGTTV---G L6ASMLG-TA GVTTTAAAGAI  
87 ANKVLRLDEI LKLANOPGNT YLKDVLNRND VDWQVLLTO KMDYK5GGL TGAGAAALVI IVTIATMGTG TAAAAGAAAG TAASGTTV---G L6ASMLG-TA GVTTTAAAGAI  
83 ANKVLRLDEI LKLANOPGNT YLKDVLNRND VDWQVLLTO KMDYK5GGL TGAGAAALVI IVTIATMGTG TAAAAGAAAG TAASGTTV---G L6ASMLG-TA GVTTTAAAGAI

1800  
83/B5 VPSTLGMAN AAVTSLA00A S1GLDNGG0 IGKTLKEMGS KDSINLQAS VVTAGLLS0V GTALNLPK-D STLLS5RDLN NFFT5VGS0L VQ----- TAINGNLG0D NLOVALLAGL  
85 VPSTLGMAN AAVTSLA00A S1GLDNGG0 IGKTLKEMGS KDSINLQAS VVTAGLLS0V GTALNLPK-D STLLS5RDLN NFFT5VGS0L VQ----- TAINGNLG0D NLOVALLAGL  
87/B5 VPSTLGMAN AAVTSLA00A S1GLDNGG0 IGKTLKEMGS KDSINLQAS VVTAGLLS0V GTALNLPK-D STLLS5RDLN NFFT5VGS0L VQ----- TAINGNLG0D NLOVALLAGL  
87 VPSTLGMAN AAVTSLA00A S1GLDNGG0 IGKTLKEMGS KDSINLQAS VVTAGLLS0V GTALNLPK-D STLLS5RDLN NFFT5VGS0L VQ----- TAINGNLG0D NLOVALLAGL  
83 VPSTLGMAN AAVTSLA00A S1GLDNGG0 IGKTLKEMGS KDSINLQAS VVTAGLLS0V GTALNLPK-D STLLS5RDLN NFFT5VGS0L VQ----- TAINGNLG0D NLOVALLAGL

1920  
83/B5 AGALQELAS QIGTSLDKVD PNFIEYTIHK IAHAAVGC5A AAKTK5S5CA GAIGAGVGEI VAGLMP5EPA---NGIEYD5AE KLIKIRNIGKL V5GTVAA5YT YDNTAAN5A DTAI0NN5LV  
85 AGALQELAS QIGTSLDKVD PNFIEYTIHK IAHAAVGC5A AAKTK5S5CA GAIGAGVGEI VAGLMP5EPA---NGIEYD5AE KLIKIRNIGKL V5GTVAA5YT YDNTAAN5A DTAI0NN5LV  
87/B5 AGALQELAS QIGTSLDKVD PNFIEYTIHK IAHAAVGC5A AAKTK5S5CA GAIGAGVGEI VAGLMP5EPA---NGIEYD5AE KLIKIRNIGKL V5GTVAA5YT YDNTAAN5A DTAI0NN5LV  
87 AGALQELAS QIGTSLDKVD PNFIEYTIHK IAHAAVGC5A AAKTK5S5CA GAIGAGVGEI VAGLMP5EPA---NGIEYD5AE KLIKIRNIGKL V5GTVAA5YT YDNTAAN5A DTAI0NN5LV  
83 AGALQELAS QIGTSLDKVD PNFIEYTIHK IAHAAVGC5A AAKTK5S5CA GAIGAGVGEI VAGLMP5EPA---NGIEYD5AE KLIKIRNIGKL V5GTVAA5YT YDNTAAN5A DTAI0NN5LV

2040  
83/B5 RLATTTGKLL VKAEIYDGI KKANGIY5DS KVFQV0KLD0 G5VEL---GI ADDLVTF5G ASTPDRALA AFDLIGTDL KPGKASLKL A-QAELDKL ---VDQAYTLK VLQVKKD5VT  
85 RLATTTGKLL VKAEIYDGI KKANGIY5DS KVFQV0KLD0 G5VEL---GI ADDLVTF5G ASTPDRALA AFDLIGTDL KPGKASLKL A-QAELDKL ---VDQAYTLK VLQVKKD5VT  
87/B5 RLATTTGKLL VKAEIYDGI KKANGIY5DS KVFQV0KLD0 G5VEL---GI ADDLVTF5G ASTPDRALA AFDLIGTDL KPGKASLKL A-QAELDKL ---VDQAYTLK VLQVKKD5VT  
87 RLATTTGKLL VKAEIYDGI KKANGIY5DS KVFQV0KLD0 G5VEL---GI ADDLVTF5G ASTPDRALA AFDLIGTDL KPGKASLKL A-QAELDKL ---VDQAYTLK VLQVKKD5VT  
83 RLATTTGKLL VKAEIYDGI KKANGIY5DS KVFQV0KLD0 G5VEL---GI ADDLVTF5G ASTPDRALA AFDLIGTDL KPGKASLKL A-QAELDKL ---VDQAYTLK VLQVKKD5VT

2160  
83/B5 RNR-----LN K5EF5MSA5 KL5-VKRN0 R0MIIKT5R D0G0IIIPDA F0NG5TLV5F KNVQV0LTD0 OLR5YGAT5K PVTLVN5NNT KIS5TVK5NI L5NKGTI0RF DPKI5NTH5Y  
85 RNR-----LN K5EF5MSA5 KL5-VKRN0 R0MIIKT5R D0G0IIIPDA F0NG5TLV5F KNVQV0LTD0 OLR5YGAT5K PVTLVN5NNT KIS5TVK5NI L5NKGTI0RF DPKI5NTH5Y  
87/B5 RNR-----LN K5EF5MSA5 KL5-VKRN0 R0MIIKT5R D0G0IIIPDA F0NG5TLV5F KNVQV0LTD0 OLR5YGAT5K PVTLVN5NNT KIS5TVK5NI L5NKGTI0RF DPKI5NTH5Y  
87 RNR-----LN K5EF5MSA5 KL5-VKRN0 R0MIIKT5R D0G0IIIPDA F0NG5TLV5F KNVQV0LTD0 OLR5YGAT5K PVTLVN5NNT KIS5TVK5NI L5NKGTI0RF DPKI5NTH5Y  
83 RNR-----LN K5EF5MSA5 KL5-VKRN0 R0MIIKT5R D0G0IIIPDA F0NG5TLV5F KNVQV0LTD0 OLR5YGAT5K PVTLVN5NNT KIS5TVK5NI L5NKGTI0RF DPKI5NTH5Y

2275  
83/B5 LTR5E5GILT V5K5GAT5TA K5CSA-GKLT Q5T5E5TAK0 S5K5QAP5TS I5SA5Q0TKV I5D5VK5TIPV F5NG5VLD5RP LP5AV5G5Y5 K5PV5D5SPN I5N5SH5NGY H5G5LRL5AN5V  
85 LTR5E5GILT V5K5GAT5TA K5CSA-GKLT Q5T5E5TAK0 S5K5QAP5TS I5SA5Q0TKV I5D5VK5TIPV F5NG5VLD5RP LP5AV5G5Y5 K5PV5D5SPN I5N5SH5NGY H5G5LRL5AN5V  
87/B5 LTR5E5GILT V5K5GAT5TA K5CSA-GKLT Q5T5E5TAK0 S5K5QAP5TS I5SA5Q0TKV I5D5VK5TIPV F5NG5VLD5RP LP5AV5G5Y5 K5PV5D5SPN I5N5SH5NGY H5G5LRL5AN5V  
87 LTR5E5GILT V5K5GAT5TA K5CSA-GKLT Q5T5E5TAK0 S5K5QAP5TS I5SA5Q0TKV I5D5VK5TIPV F5NG5VLD5RP LP5AV5G5Y5 K5PV5D5SPN I5N5SH5NGY H5G5LRL5AN5V  
83 LTR5E5GILT V5K5GAT5TA K5CSA-GKLT Q5T5E5TAK0 S5K5QAP5TS I5SA5Q0TKV I5D5VK5TIPV F5NG5VLD5RP LP5AV5G5Y5 K5PV5D5SPN I5N5SH5NGY H5G5LRL5AN5V

2615  
83/B5 A0QPN5AVLK F6GDL5TH5G5 D1S5D5V5K5T G5V5L5D5K5YR S5N5K5L5G5AT T5T5N5TR5T5N A5N5E5L5T5R O5N5L5P5E5V5K0 V5L5N5L5D5G5T F5T5Y5V5AT5G S5N5S5I5F5C5V N5K5V5C

Supplementary Fig. 6. Coiled-coil conformation of type-I CdiA proteins predicted by the MARCOIL program

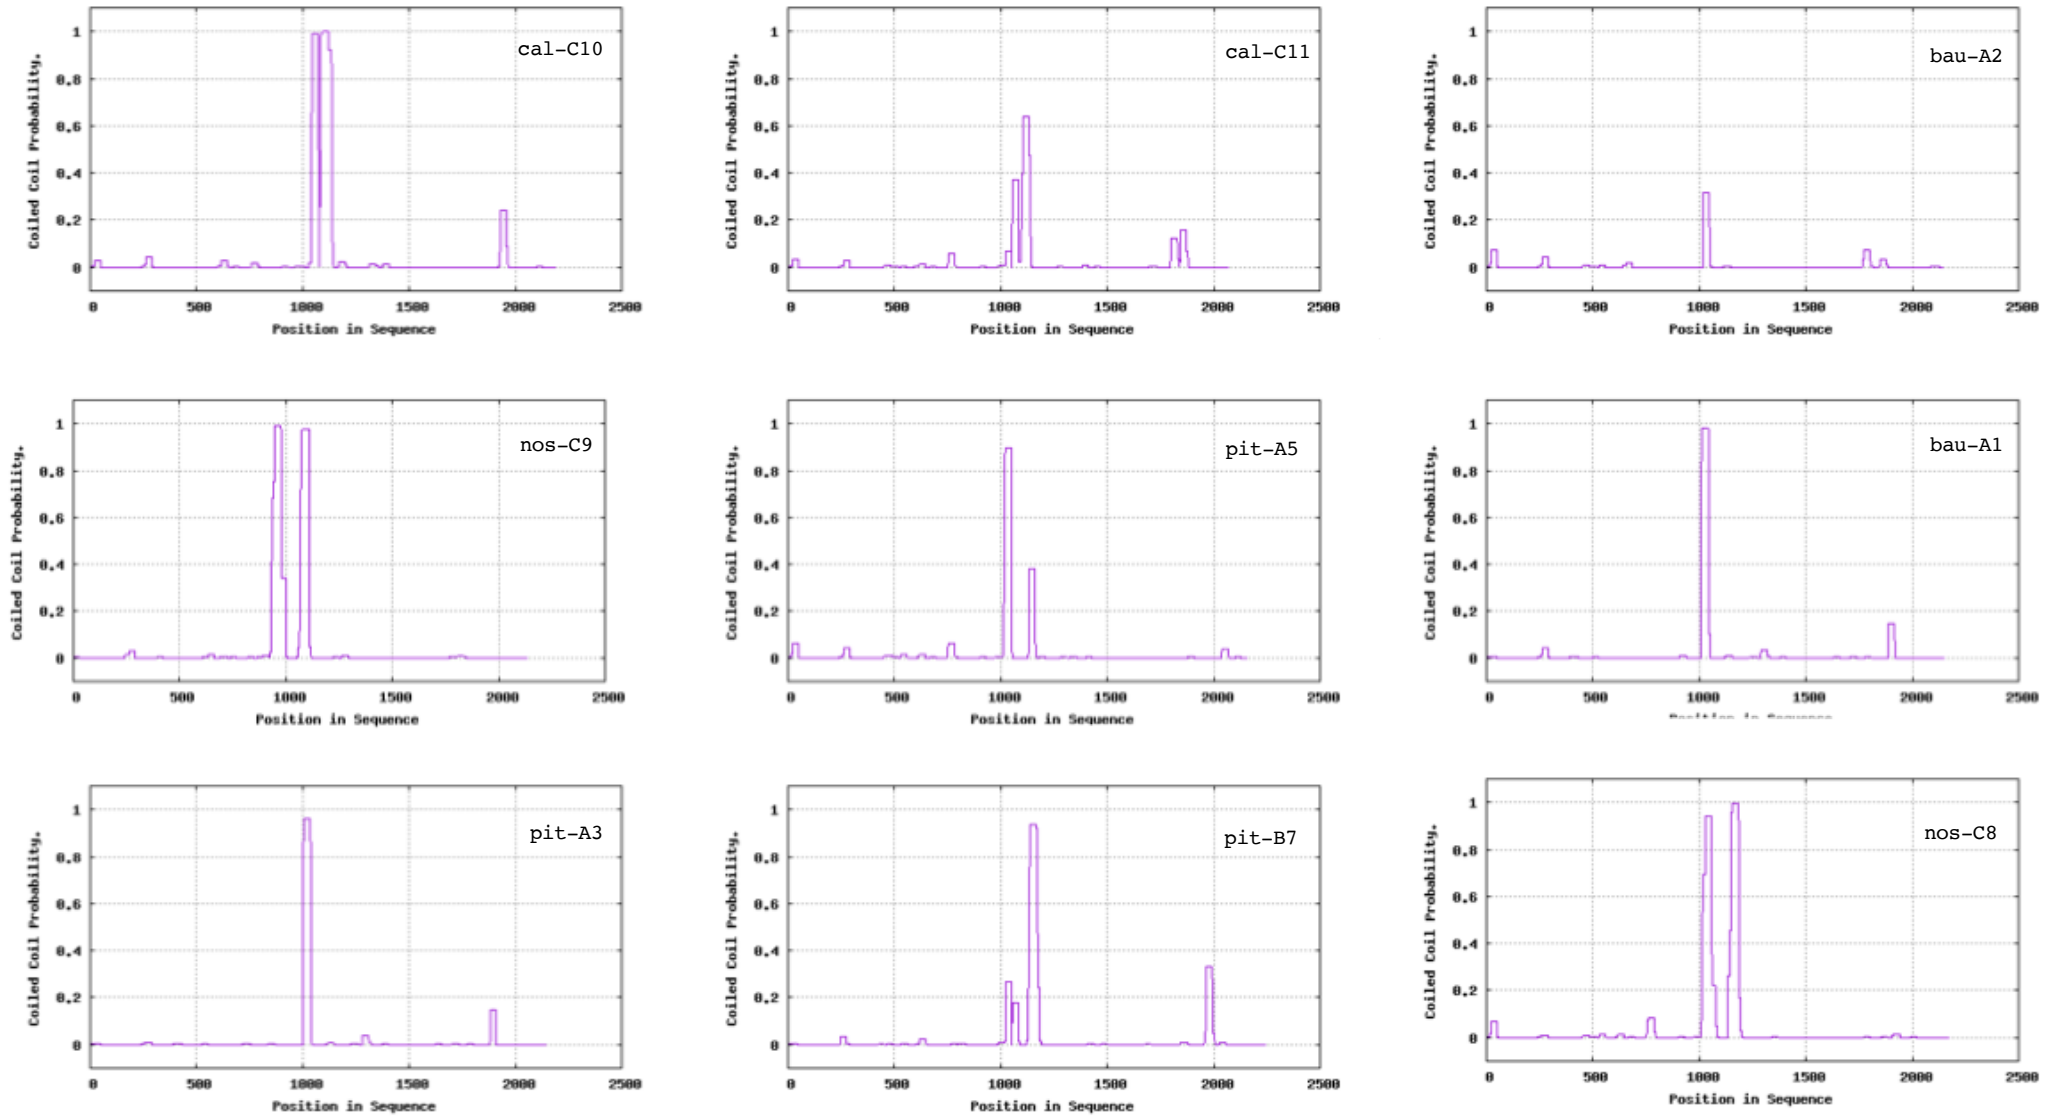

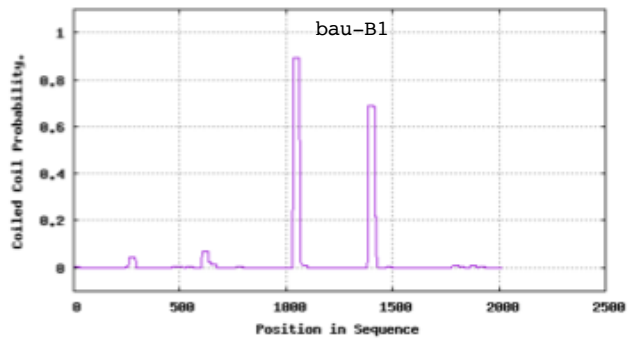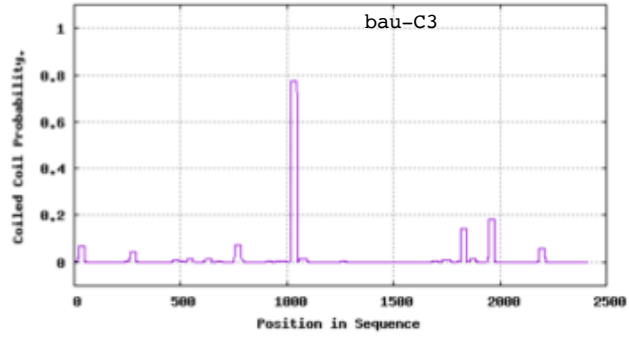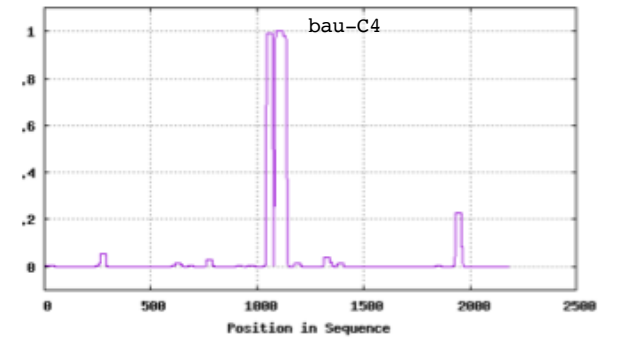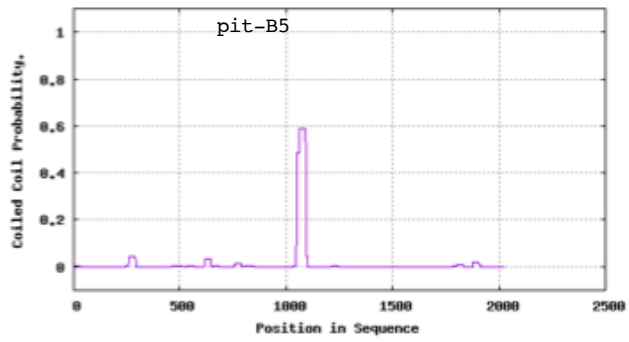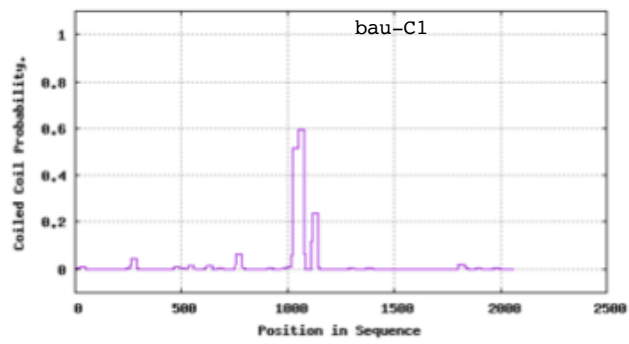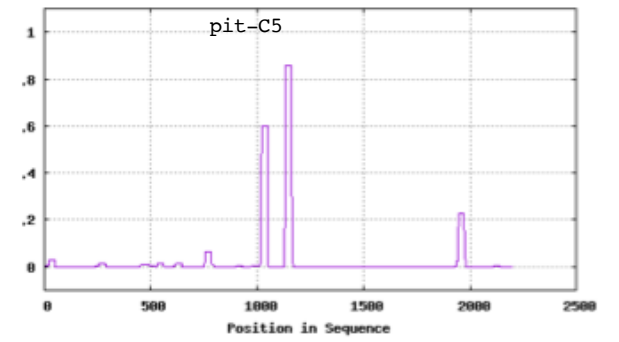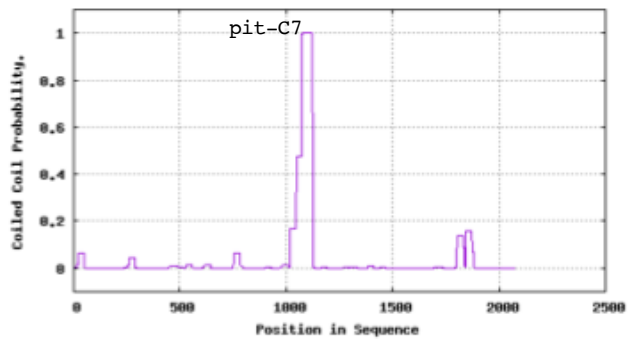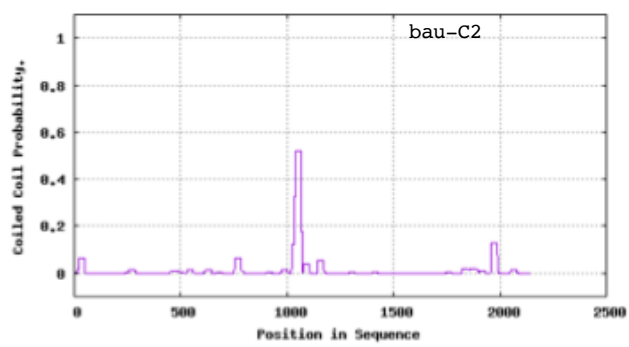

Supplementary file 7. *Acinetobacter pittii* strains carrying multiple *cdiA* genes

| <i>pit-A3</i> | <i>pit-A4</i> | <i>pit-A5</i> | <i>pit-A4/C7/A4</i> | <i>pitA5/A4/A5</i> | <i>pitA5/C7/A5</i> | <i>pitA5/C8/A5</i> | <i>pit-A5/n2/A5</i> | <i>pit-B7/pit-B5</i> | <i>pit-B5</i> | <i>pit-C6</i> | <i>pit-C5</i> | <i>bau-B3/B5</i> | <i>pit-B7</i> | <i>pit-B6</i> | strain      | ST   | Place of isolation   |
|---------------|---------------|---------------|---------------------|--------------------|--------------------|--------------------|---------------------|----------------------|---------------|---------------|---------------|------------------|---------------|---------------|-------------|------|----------------------|
|               |               |               |                     |                    |                    | •                  |                     | •                    | •             |               |               |                  |               |               | DSM 25618   | 63   | unknown              |
|               |               |               |                     |                    |                    | •                  |                     | •                    | •             |               |               |                  |               |               | ATCC19004   | 63   | unknown              |
|               |               |               |                     |                    |                    | •                  |                     | •                    | •             |               |               |                  |               |               | St-10592-91 | 64   | Germany Cologne      |
|               |               |               |                     |                    |                    | •                  |                     | •                    | •             |               |               |                  |               |               | St-20772-90 | 64   | Germany Cologne      |
|               |               |               |                     |                    |                    | •                  |                     | •                    | •             |               |               |                  |               |               | St-14379-92 | 64   | Germany Cologne      |
|               |               |               |                     |                    |                    | •                  |                     | •                    | •             |               |               |                  |               |               | DSM 9306    | 64   | unknown              |
|               |               |               |                     |                    |                    | •                  |                     | •                    | •             |               |               |                  |               |               | UKK-0548    | 248  | Germany              |
|               |               |               |                     |                    |                    | •                  |                     | •                    | •             |               |               |                  |               |               | UKK-0556    | 248  | Germany Bochum       |
|               |               |               |                     |                    |                    | •                  |                     | •                    | •             |               |               |                  |               |               | PR386       | 248  | unknown              |
|               |               |               |                     |                    |                    | •                  |                     | •                    | •             |               |               |                  |               |               | ARLG 1839   | 396  | unknown              |
|               |               |               |                     |                    |                    | •                  |                     | •                    | •             |               |               |                  |               |               | PR368       | 744  | unknown              |
|               |               |               |                     |                    |                    |                    |                     | •                    | •             |               |               |                  |               |               | UKK-0547    | 63   | Germany Dresden      |
|               |               |               |                     |                    |                    |                    |                     | •                    | •             |               |               |                  |               |               | UKK-0327    | 64   | Germany mainz        |
|               |               |               |                     |                    |                    |                    |                     | •                    | •             |               |               |                  |               |               | PR313       | 64   | unknown              |
|               |               |               |                     |                    |                    |                    |                     | •                    | •             |               |               |                  |               |               | PR370       | 64   | unknown              |
|               |               |               |                     |                    |                    |                    |                     | •                    | •             |               |               |                  |               |               | ARLG 1803   | 64   | unknown              |
|               |               | •             |                     |                    |                    |                    |                     | •                    | •             |               |               |                  |               |               | St-12537-91 | 70   | Germany Cologne      |
|               |               |               |                     |                    |                    |                    |                     | •                    | •             |               |               |                  |               |               | SH024       | 93   | unknown              |
|               |               |               |                     |                    |                    |                    |                     | •                    | •             |               |               |                  |               |               | ABBL10      | 93   | USA Chicago          |
|               |               |               |                     |                    |                    |                    |                     | •                    | •             |               |               |                  |               |               | ABBL047     | 93   | USA Chicago          |
|               |               |               |                     |                    |                    |                    |                     | •                    | •             |               |               |                  |               |               | ABBL065     | 93   | USA Chicago          |
|               |               |               |                     |                    |                    |                    |                     | •                    | •             |               |               |                  |               |               | ABBL103     | 93   | USA Chicago          |
|               |               |               |                     |                    |                    |                    |                     | •                    | •             |               |               |                  |               |               | St-11469-92 | 93   | Germany Cologne      |
|               |               |               |                     |                    |                    |                    |                     | •                    | •             |               |               |                  |               |               | UKK-0245    | 93   | Germany Berlin       |
|               |               |               |                     |                    |                    |                    |                     | •                    | •             |               |               |                  |               |               | UKK-0544    | 93   | Germany Braunschweig |
|               |               |               |                     |                    |                    |                    |                     | •                    | •             |               |               |                  |               |               | UKK-0555    | 93   | Germany              |
|               |               |               |                     |                    |                    |                    |                     | •                    | •             |               |               |                  |               |               | St-15639-92 | 93   | Germany Cologne      |
|               |               |               |                     |                    |                    |                    |                     | •                    | •             |               |               |                  |               |               | St-15559-91 | 93   | Germany Cologne      |
|               |               |               |                     |                    |                    |                    |                     | •                    | •             |               |               |                  |               |               | St-14569-91 | 93   | Germany Cologne      |
|               |               |               |                     |                    |                    |                    |                     | •                    | •             |               |               |                  |               |               | ABUH403     | 93   | USA                  |
|               |               |               |                     |                    |                    |                    |                     | •                    | •             |               |               |                  |               |               | ARLG 1776   | 93   | unknown              |
|               |               |               |                     |                    |                    |                    |                     | •                    | •             |               |               |                  |               |               | ARLG 1798   | 93   | unknown              |
|               |               |               |                     |                    |                    |                    |                     | •                    | •             |               |               |                  |               |               | IHIT32685   | 93   | Germany              |
|               |               |               |                     |                    |                    |                    |                     | •                    | •             |               |               |                  |               |               | IHIT32473   | 93   | Germany              |
|               |               |               |                     |                    |                    |                    |                     | •                    | •             |               |               |                  |               |               | UBA2478     | 396  | USA New York         |
|               |               |               |                     |                    |                    |                    |                     | •                    | •             |               |               |                  |               |               | ARLG 1768   | 396  | unknown              |
|               |               |               |                     |                    |                    |                    |                     | •                    | •             |               |               |                  |               |               | NBRC 110510 | 1172 | Japan Hyogo          |
|               |               |               |                     |                    |                    |                    |                     | •                    | •             |               |               |                  |               |               | PR339       | 744  | unknown              |
|               |               |               |                     |                    |                    |                    |                     | •                    | •             |               |               |                  |               |               | XH765       | nd   | China Hangzhou       |
|               |               |               |                     |                    |                    |                    |                     | •                    | •             |               |               |                  |               |               | ARLG 1771   | 1173 | unknown              |
|               |               |               |                     |                    |                    |                    |                     | •                    | •             |               |               |                  |               |               | St-19650-90 | 747  | Germany Cologne      |
|               |               |               |                     |                    |                    |                    |                     | •                    | •             |               |               |                  |               |               | ARLG 1875   | nd   | unknown              |
|               |               |               |                     |                    |                    |                    |                     | •                    | •             |               |               |                  |               |               | ABUH540     | 1175 | USA Ohio             |
|               |               |               |                     |                    |                    |                    |                     | •                    | •             |               |               |                  |               |               | ARLG 1950   | nd   | unknown              |
|               |               |               |                     |                    |                    | •                  |                     | •                    | •             |               |               |                  |               |               | NBRC 110508 | 1178 | Japan Osaka          |
|               |               |               |                     |                    |                    |                    |                     | •                    | •             |               |               |                  |               |               | PR301       | 457  | unknown              |
|               |               |               |                     |                    |                    |                    |                     | •                    | •             |               |               |                  |               |               | NBRC 110506 | 220  | Japan Gifu           |
|               |               |               |                     |                    |                    |                    |                     | •                    | •             |               |               |                  |               |               | 1295259     | 119  | USA                  |
|               |               |               |                     |                    |                    |                    |                     | •                    | •             |               |               |                  |               |               | PR348       | 119  | unknown              |
|               |               |               |                     |                    |                    |                    |                     | •                    | •             |               |               |                  |               |               | CR12-42     | 119  | Australia            |
|               |               |               |                     |                    |                    |                    |                     | •                    | •             |               |               |                  |               |               | 269         | 119  | Malaysia             |
|               |               |               |                     |                    |                    |                    |                     | •                    | •             |               |               |                  |               |               | NBRC 110504 | 119  | Japan Osaka          |
|               |               |               |                     |                    |                    |                    |                     | •                    | •             |               |               |                  |               |               | NBRC 110507 | 119  | Japan Osaka          |
|               |               |               |                     |                    |                    |                    |                     | •                    | •             |               |               |                  |               |               | NBRC 110509 | 119  | Japan Hyogo          |
|               |               |               |                     |                    |                    |                    |                     | •                    | •             |               |               |                  |               |               | ABBL111     | 119  | USA Chicago          |
|               |               |               |                     |                    |                    |                    |                     | •                    | •             |               |               |                  |               |               | PR320       | 119  | unknown              |
|               |               |               |                     |                    |                    |                    |                     | •                    | •             |               |               |                  |               |               | IPK TSA6.1  | 321  | South Korea          |
|               |               |               |                     |                    |                    |                    |                     | •                    | •             |               |               |                  |               |               | UBA2484     | 1171 | USA New York         |
|               |               |               |                     |                    |                    |                    |                     | •                    | •             |               |               |                  |               |               | ARLG 1957   | 1169 | unknown              |
|               |               |               |                     |                    |                    |                    |                     | •                    | •             |               |               |                  |               |               | ABBL024     | 643  | USA Chicago          |
|               |               |               |                     |                    |                    |                    |                     | •                    | •             |               |               |                  |               |               | TCM292      | 207  | China Hangzhou       |
|               |               |               |                     |                    |                    |                    |                     | •                    | •             |               |               |                  |               |               | 907131      | 220  | USA                  |
|               |               |               |                     |                    |                    |                    |                     | •                    | •             |               |               |                  |               |               | FC8876      | 643  | Rio de Janeiro       |
|               |               |               |                     |                    |                    |                    |                     | •                    | •             |               |               |                  |               |               | St-12828-92 | 744  | Germany Cologne      |
|               |               |               |                     |                    |                    |                    |                     | •                    | •             |               |               |                  |               |               | UKK-0546    | 776  | Germany Munich       |
|               |               |               |                     |                    |                    |                    |                     | •                    | •             |               |               |                  |               |               | IEC338SC    | 1076 | Brazil               |
|               |               |               |                     |                    |                    |                    |                     | •                    | •             |               |               |                  |               |               | ABBL103     | 93   | USA Chicago          |
|               |               |               |                     |                    |                    |                    |                     | •                    | •             |               |               |                  |               |               | ABBL033     | 1170 | USA Chicago          |
|               |               |               |                     |                    |                    |                    |                     | •                    | •             |               |               |                  |               |               | ARLG 1933   | 1165 | unknown              |

Supplementary file 8. Type-II CdIA alignment.

Residues color: red, high consensus value (90%); blu, moderate consensus value(50%)

PT-VENN motifs, PT-LPEN motifs and the FhaB domain are highlighted in green,turquoise and grey, respectively.

Table with 20 columns of amino acid sequences for residues 1-120. Sequences are aligned across various protein variants (bau-D1 to bay-D15) and include motifs like AGSQGQVGT, DSTIDSVLPI, and others.

Table with 20 columns of amino acid sequences for residues 121-240. Sequences are aligned across various protein variants (bau-D1 to bay-D15) and include motifs like QGGWVQGNP, WLAKGEAKVI, and others.

Table with 20 columns of amino acid sequences for residues 241-360. Sequences are aligned across various protein variants (bau-D1 to bay-D15) and include motifs like LTPYTDIYAR, ALKVNAGLYA, and others.

Table with 20 columns of amino acid sequences for residues 361-480. Sequences are aligned across various protein variants (bau-D1 to bay-D19) and include motifs like IANKDQVQLK, AONIKNTGNV, and others.





baud-020 AOSNIDAAGK QLOAQNIELG SVTGNISTQA GSVVAKD-QL K-LVSONLIN NOOGLLSAQ IVLN-AKQL NSQGKIQHTG TNDLNIQFAN GLNNKAGEIS SNASSINLNT SALNNEAGKI  
baud-015 AOSNIDAAGK QLOAQNIELG SVTGNISTQA GSVVAKD-QL N-LVSONLIN NOOGLLSAQ IVLN-AKQL NSQGKIQHTG INEFALNFVN GLNNKAGEIS SNASSINLNT SALNNEAGKI  
baud-016 AOSNIDAAGK QLOAQNIELG SVTGNISTQA GSVVAKD-QL K-LTSRNLIN NOOGLLSAQ L1LT-AKQL NSQGKIQHTG NNEFTLDFVN GLNNKAGEIS SNASSINLNT SALNNEAGKI  
baud-021 ATGIDAAQG QLOQSKIALN AGT-DISTQT ATVVAQN-QL K-LTSRNLIN NOOGLLSAQ L1LT-AKQL NSQGKIQHTG NNEFTLDFVN GLNNKAGEIS SNASSINLNT SALNNEAGKI  
baud-019 AOSNIDAAGK QLOAQNIELG SVTGNISTQA GSVVAKD-QL K-LVSONLIN NOOGLLSAQ L1LT-AKQL NSQGKIQHTG NNEFTLDFVN GLNNKAGEIS SNASSINLNT SALNNEAGKI  
baud-013 AOSNIDAAGK QLOAQNIELG SVTGNISTQA GSVVAKD-QL K-LVSONLIN NOOGLLSAQ L1LT-AKQL NSQGKIQHTG NNEFTLDFVN GLNNKAGEIS SNASSINLNT SALNNEAGKI  
cal-023 AOSNIDAAGK QLOAQNIELG SVTGNISTQA GSVVAKD-QL K-LVSONLIN NOOGLLSAQ L1LT-AKQL NSQGKIQHTG NNEFTLDFVN GLNNKAGEIS SNASSINLNT SALNNEAGKI  
pit-020 AOSNIDAAGK QLOAQNIELG SVTGNISTQA GSVVAKD-QL N-LVSONLIN NOOGLLSAQ IVLN-AKQL NSQGKIQHTG NNEFTLDFVN GLNNKAGEIS SNASSINLNT SALNNEAGKI  
pit-06 AOSNIDAAGK QLOAQNIELG SVTGNISTQA GSVVAKD-QL N-LVSONLIN NOOGLLSAQ IVLN-AKQL NSQGKIQHTG NNEFTLDFVN GLNNKAGEIS SNASSINLNT SALNNEAGKI  
baud-017 AOSNIDAAGK QLOAQNIELG SVTGNISTQA GSVVAKD-QL K-LTSRNLIN NOOGLLSAQ L1LT-AKQL NSQGKIQHTG NNEFTLDFVN GLNNKAGEIS SNASSINLNT SALNNEAGKI  
nos-018 ATRTINAAGQ QLOQSKIALN AGT-DISTQA ATVVAQN-QL K-LTSRNLIN NOOGLLSAQ L1LT-AKQL NSQGKIQHTG NNEFTLDFVN GLNNKAGEIS SNASSINLNT SALNNEAGKI  
nos-022 ATGIDAAQG QLOQSKIALN AGT-DISTQA ATVVAQN-QL K-LASONLIN NOOGLLSAQ ILS-AQQL NSQGKIQHTG NNEFTLDFVN GLNNKAGEIS SNASSINLNT SALNNEAGKI  
baud-02 AAOQTDLLOS ESQAKNVQIE TTFQDTS-A KIAADR-QL D-IRALQSN NEKGOYSAEQ VNLN-TAQLN NNQGLIHTG KNDFILNVAD RIANHAGKII SNAKTEIKI NTLSSVAGEI  
bay-015 SKQIDATNG QLOQAKVIDLA SDAQDISTR ATVIAE-QL S-LKSHOLD NOOGLLSAQ LNLT-ANRLD NTQGHILHTG QDQLDLNFSQ SLNNQLGIEIR SNAELNLIKI ALLNNTGQV

1961  
baud-01 LHSQOAGLNM DIQNIHAQKA ELRTNGALKL TTDQALLDQS KVSATOANIQ ANOFTDRNGE MLFSAVNGOS SIRVNGDYQH QGSVLOSNSH LDIQTGSLSN QNGNIVLVTQN GSSSQPV---  
nos-02 LHSQOAGLNM DIQNIHAQKA ELRTNGALKL TTDQALLDQS KVSATOANIQ ANOFTDRNGE MLFSAVNGOS SIRVNGDYQH QGSVLOSNSH LDIQTGSLSN QNGNIVLVTQN EATSQPV---  
baud-03 LHSQOAGLNM DIQNIHAQKA ELRTNGALKL TTDQALLDQS KVSATOANIQ ANOFTDRNGE MLFSAVNGOS SIRVNGDYQH QGSVLOSNSH LDIQTGSLSN QNGNIVLVTQN EATSQPV---  
nos-04 LHSQOAGLNM DIQNIHAQKA ELRTNGALKL TTDQALLDQS KVSATOANIQ ANOFTDRNGE MLFSAVNGOS SIRVNGDYQH QGSVLOSNSH LDIQTGSLSN QNGNIVLVTQN EATSQPV---  
baud-07 LHSQOAGLNM DIQNIHAQKA ELRTNGALKL TTDQALLDQS KVSATOANIQ ANOFTDRNGE MLFSAVNGOS SIRVNGDYQH QGSVLOSNSH LDIQTGSLSN QNGNIVLVTQN EATSQPV---  
baud-05 LHSQOAGLNM DIQNIHAQKA ELRTNGALKL TTDQALLDQS KVSATOANIQ ANOFTDRNGE MLFSAVNGOS SIRVNGDYQH QGSVLOSNSH LDIQTGSLSN QNGNIVLVTQN EATSQPV---  
nos-08 LHSQOAGLNM DIQNIHAQKA ELRTNGALKL TTDQALLDQS KVSATOANIQ ANOFTDRNGE MLFSAVNGOS SIRVNGDYQH QGSVLOSNSH LDIQTGSLSN QNGNIVLVTQN EATSQPV---  
baud-09 LHSQOAGLNM DIQNIHAQKA ELRTNGALKL TTDQALLDQS KVSATOANIQ ANOFTDRNGE MLFSAVNGOS SIRVNGDYQH QGSVLOSNSH LDIQTGSLSN QNGNIVLVTQN EATSQPV---  
baud-06 LHSQOAGLNM DIQNIHAQKA ELRTNGALKL TTDQALLDQS KVSATOANIQ ANOFTDRNGE MLFSAVNGOS SIRVNGDYQH QGSVLOSNSH LDIQTGSLSN QNGNIVLVTQN EATSQPV---  
nos-012 LHSQOAGLNM DIQNIHAQKA ELRTNGALKL TTDQALLDQS KVSATOANIQ ANOFTDRNGE MLFSAVNGOS SIRVNGDYQH QGSVLOSNSH LDIQTGSLSN QNGNIVLVTQN EATSQPV---  
baud-010 IHAGNQQLIN TADOLGQAQ QILSNQGLLL KGGQVLDGA TTSANOINIS ADLSLHOKGQ MVOSGTLNPL TLAIKDQNNN QLGFISQSQS LQKTTTLLN QGGQLSSALN YDQVQDVALG  
baud-011 IHAGNQQLIN TADOLGQAQ QILSNQGLLL KGGQVLDGA TTSANOINIS ADLSLHOKGQ MVOSGTLNPL TLAIKDQNNN QLGFISQSQS LQKTTTLLN QGGQLSSALN YDQVQDVALG  
baud-014 IHAGNQQLIN TADOLGQAQ QILSNQGLLL KGGQVLDGA TTSANOINIS ADLSLHOKGQ MVOSGTLNPL TLAIKDQNNN QLGFISQSQS LQKTTTLLN QGGQLSSALN YDQVQDVALG  
baud-012 IHAGNQQLIN TADOLGQAQ QILSNQGLLL KGGQVLDGA TTSANOINIS ADLSLHOKGQ MVOSGTLNPL TLAIKDQNNN QLGFISQSQS LQKTTTLLN QGGQLSSALN YDQVQDVALG  
baud-020 IHAGNQQLIN TADOLGQAQ QILSNQGLLL KGGQVLDGA TTSANOINIS ADLSLHOKGQ MVOSGTLNPL TLAIKDQNNN QLGFISQSQS LQKTTTLLN QGGQLSSALN YDQVQDVALG  
baud-015 IHAGNQQLIN TADOLGQAQ QILSNQGLLL KGGQVLDGA TTSANOINIS ADLSLHOKGQ MVOSGTLNPL TLAIKDQNNN QLGFISQSQS LQKTTTLLN QGGQLSSALN YDQVQDVALG  
baud-010 IHAGNQQLIN TADOLGQAQ QILSNQGLLL KGGQVLDGA TTSANOINIS ADLSLHOKGQ MVOSGTLNPL TLAIKDQNNN QLGFISQSQS LQKTTTLLN QGGQLSSALN YDQVQDVALG  
baud-021 IHVGNQQLIN TADOLGQAQ QILSNQGLLL KGGQVLDGA TTSANOINIS ADLSLHOKGQ MVOSGTLNPL TLAIKDQNNN QLGFISQSQS LQKTTTLLN QGGQLSSALN YDQVQDVALG  
baud-019 IHAGNQQLIN TADOLGQAQ QILSNQGLLL KGGQVLDGA TTSANOINIS ADLSLHOKGQ MVOSGTLNPL TLAIKDQNNN QLGFISQSQS LQKTTTLLN QGGQLSSALN YDQVQDVALG  
baud-013 IHAGNQQLIN TADOLGQAQ QILSNQGLLL KGGQVLDGA TTSANOINIS ADLSLHOKGQ MVOSGTLNPL TLAIKDQNNN QLGFISQSQS LQKTTTLLN QGGQLSSALN YDQVQDVALG  
cal-023 IHAGTQQLIN KANOLGQSQ QILTNQGLFV DAGIIVLDGA TTSANOINIS ANSLSHOKGQ MVORGLTKPL TLAIKDQNNN QLGFISQSQS LQKTTTLLN QGGQLSSALN YDQVQDVALG  
pit-020 IHAGSQQLIN TADOLGQAQ QILSNQGLLL KGGQVLDGA TTSANOINIS ADLSLHOKGQ MVORGLTKPL TLAIKDQNNN QLGFISQSQS LQKTTTLLN QGGQLSSALN YDQVQDVALG  
pit-06 IHVGSQQLIN TADOLGQAQ QILSNQGLLL KGGQVLDGA TTSANOINIS ADLSLHOKGQ MVORGLTKPL TLAIKDQNNN QLGFISQSQS LQKTTTLLN QGGQLSSALN YDQVQDVALG  
baud-017 IHAGSQQLIN TADOLGQAQ QILSNQGLLL KGGQVLDGA TTSANOINIS ADLSLHOKGQ MVOSGTLNPL TLAIKDQNNN QLGFISQSQS LQKTTTLLN QGGQLSSALN YDQVQDVALG  
nos-018 IHSNQQLIN NSNOLGQVQ KILSNQGLVL ATEQAILDGA ITSAODINIT AYNLSHOKGQ MIORGLTKPL TLAITDQINN QLGFISQSPA LYITAGSLNN QGGQLSSAAD HDLQDVALG  
nos-022 IHSNQQLIN NSNOLGQVQ KILSNQGLVL ATEQAILDGA ITSAODINIT AYNLSHOKGQ MIORGLTKPL TLAITDQINN QLGFISQSPA LYITAGSLNN QGGQLSSAAD HDLQDVALG  
baud-02 LHAQDQHLKI TAQNLQGGQ KIQSNSDLQL NLGTANLDKA LTAQASINLT ATELSHOKGQ LIQNDANGHL QNVVQTLN MSQVISAAGN ADIKTADLNN QSVIQTALN KDLSESQKQL  
bay-015 VHAQTQQLIN QTAQLNHLGL HILSNQGLQL KAGFLDVSQV VTSADQITIQ ANVLNNAQOQ LTRQRTSNPL NLTIQQQLNN QAGLIQSATA TDIKAGSLNN QRTLSQAQ QNLVDV---

1081  
baud-01 ---QNLIVSQN DIQNLD-GNI VSEGLSLTK GKGSINQOQN IISNTLELT TDQL --- ---INNO SQ01QA-KDI KLSASNLDNS SG ---  
nos-02 ---QNLIVSQN DIQNLD-GNI VSEGLSLTK GKGSINQOQN IISNTLELT TDQL --- ---INNO SQ01QA-KDI KLSASNLDNS SG ---  
baud-03 ---QNLIVSQN DIQNLD-GNI VSEGLSLTK GKGSINQOQN IISNTLELT TDQL --- ---INNO SQ01QA-KDI KLSASNLDNS SG ---  
nos-04 ---QNLIVSQN DIQNLD-GNI VSEGLSLTK GKGSINQOQN IISNTLELT TDQL --- ---INNO SQ01QA-KDI KLSASNLDNS SG ---  
baud-07 ---QNLIVSQN DIQNLD-GNI VSEGLSLTK GKGSINQOQN IISNTLELT TDQL --- ---INNO SQ01QA-KDI KLSASNLDNS SG ---  
baud-05 ---QNLIVSQN DIQNLD-GNI VSEGLSLTK GKGSINQOQN IISNTLELT TDQL --- ---INNO SQ01QA-KDI KLSASNLDNS SG ---  
nos-08 ---QNLIVSQN DIQNLD-GNI VSEGLSLTK GKGSINQOQN IISNTLELT TDQL --- ---INNO SQ01QA-KDI KLSASNLDNS SG ---  
baud-09 ---QNLIVSQN DIQNLD-GNI VSEGLSLTK GKGSINQOQN IISNTLELT TDQL --- ---INNO SQ01QA-KDI KLSASNLDNS SG ---  
baud-06 ---QNLIVSQN DIQNLD-GNI VSEGLSLTK GKGSINQOQN IISNTLELT TDQL --- ---INNO SQ01QA-KDI KLSASNLDNS SG ---  
nos-012 ---QNLIVSQN DIQNLD-GNI VSEGLSLTK GKGSINQOQN IISNTLELT TDQL --- ---INNO SQ01QA-KDI KLSASNLDNS SG ---  
baud-010 LDNSQSGKIY AGONGVIOAG SINNSINGLI SAQNALTLTS LGIINNSQSK IVANQDVTLT SMLDNSSGQ IGSSQGVIAI NAGSGVNNNT SGTLOAEKDL SVSADQINNO SGLMNSOSSL  
baud-011 LDNSQSGKIY AGOSVIOAG SINNSINGLI SAQNALTLTS LGIINNSQSK IVANQDVTLT SMLDNSSGQ IGSSQGVIAI NAGSGVNNNT SGTLOAEKDL SVSADQINNO SGLMNSOSSL  
baud-014 LDNSQSGKIY AGOSVIOAG SINNSINGLI SAQNALTLTS LGIINNSQSK IVANQDVTLT SMLDNSSGQ IGSSQGVIAI NAGSGVNNNT SGTLOAEKDL SVSADQINNO SGLMNSOSSL  
baud-012 LDNSQSGKIY AGOSVIOAG SINNSINGLI SAQNALTLTS LGIINNSQSK IVANQDVTLT SMLDNSSGQ IGSSQGVIAI NAGSGVNNNT SGTLOAEKDL SVSADQINNO SGLMNSOSSL  
baud-020 LDNSQSGKIY AGONGVIOAG SIDNSLSGLI SAQNALTLTS LGIINNSQSK IVANQDVTLT SMLDNSSGQ IGSSQGVIAI NAGSGVNNNT SGTLOAEKDL SVSADQINNO SGLMNSOSSL  
baud-015 LDNSQSGKIY AGOSVIOAG SIDNSLSGLI SAQNALTLTS LGIINNSQSK IVANQDVTLT SMLDNSSGQ IGSSQGVIAI NAGSGVNNNT SGTLOAEKDL SVSADQINNO SGLMNSOSSL  
baud-016 LDNSQSGKIY AGONGVIOAG SIDNSLSGLI SAQNALTLTS LGIINNSQSK IVANQDVTLT SMLDNSSGQ IGSSQGVIAI NAGSGVNNNT SGTLOAEKDL SVSADQINNO SGLMNSOSSL  
baud-021 LDNSQSGKIY AGONGVIOAG SIDNSLSGLI SAQNALTLTS LGIINNSQSK IVANQDVTLT SMLDNSSGQ IGSSQGVIAI NAGSGVNNNT SGTLOAEKDL SVSADQINNO SGLMNSOSSL  
baud-019 LDNSQSGKIY AGONGVIOAG SIDNSLSGLI SAQNALTLTS LGIINNSQSK IVANQDVTLT SMLDNSSGQ IGSSQGVIAI NAGSGVNNNT SGTLOAEKDL SVSADQINNO SGLMNSOSSL  
baud-013 LDNSQSGKIY AGONGVIOAG SIDNSLSGLI SAQNALTLTS LGIINNSQSK IVANQDVTLT SMLDNSSGQ IGSSQGVIAI NAGSGVNNNT SGTLOAEKDL SVSADQINNO SGLMNSOSSL  
cal-023 LDNSQSGKIY AGONGVIOAG SIDNSLSGLI SAQNALTLTS LGIINNSQSK IVANQDVTLT SMLDNSSGQ IGSSQGVIAI NAGSGVNNNT SGTLOAEKDL SVSADQINNO SGLMNSOSSL  
pit-020 LDNSQSGKIY AGONGVIOAG SIDNSLSGLI SAQNALTLTS LGIINNSQSK IVANQDVTLT SMLDNSSGQ IGSSQGVIAI NAGSGVNNNT SGTLOAEKDL SVSADQINNO SGLMNSOSSL  
pit-06 LDNSQSGKIY AGONGVIOAG SIDNSLSGLI SAQNALTLTS LGIINNSQSK IVANQDVTLT SMLDNSSGQ IGSSQGVIAI NAGSGVNNNT SGTLOAEKDL SVSADQINNO SGLMNSOSSL  
baud-017 LDNSQSGKIY AGONGVIOAG SIDNSLSGLI SAQNALTLTS LGIINNSQSK IVANQDVTLT SMLDNSSGQ IGSSQGVIAI NAGSGVNNNT SGTLOAEKDL SVSADQINNO SGLMNSOSSL  
nos-018 LDNSQSGKIY AGONNINHAG SINNSIAGQI SAQNALTLTS LGIINNSQSK IVANQDVTR SEGLDNTGQ IGSVQAGLTL DVGKGLTNO SGLQADKNI EIKADQKTO AGLISAQGI  
nos-022 LDNSQSGKIY AGONNINHAG SINNSIAGQI SAQNALTLTS LGIINNSQSK IVANQDVTR SEGLDNTGQ IGSVQAGLTL DVGKGLTNO SGLQADKNI EIKADQKTO AGLISAQGI  
baud-02 ---ENOSGKIY AGRDAAIKTT QLNN-DTGT YAAGKLGHA TDVSNQOGL IAAQSLNIE AQNLNNSKGO IQTESGDANL TIAQ-ILNNO AGHIQAANAL NIVATQVENO AG ---  
bay-015 VAGKLD ---NSQ-SGQI YAGNOAHQV GSDINSHGQ INAQOQLLT SQQ --- ---INNO SG ---

1201  
baud-01 ---VIAAKT GDV-SLNNIN Q --- ---LINGRVE QKGSAGIIQA AQNDIVOTGL LDN-SGLIYA --- ---GONOQLK VAQNLKNAQ LAAQNNLNITQ  
nos-02 ---VIAAKT GDV-SLNNIN Q --- ---LINGRVE QKGSAGIIQA AQNDIVOTGL LDN-SGLIYA --- ---GONOQLK VAQNLKNAQ LAAQNNLNITQ  
baud-03 ---VIAAKT GDV-SLNNIN Q --- ---LINGRVE QKGSAGIIQA AQNDIVOTGL LDN-SGLIYA --- ---GONOQLK VAQNLKNAQ LAAQNNLNITQ  
nos-04 ---VIAAKT GDV-SLNNIN Q --- ---LINGRVE QKGSAGIIQA AQNDIVOTGL LDN-SGLIYA --- ---GONOQLK VAQNLKNAQ LAAQNNLNITQ  
baud-07 ---VIAAKT GDV-SLNNIN Q --- ---LINGRVE QKGSAGIIQA AQNDIVOTGL LDN-SGLIYA --- ---GONOQLK VAQNLKNAQ LAAQNNLNITQ  
baud-05 ---VIAAKT GDV-SLNNIN Q --- ---LINGRVE QKGSAGIIQA AQNDIVOTGL LDN-SGLIYA --- ---GONOQLK VAQNLKNAQ LAAQNNLNITQ  
nos-08 ---VIAAKT GDV-SLNNIN Q --- ---LINGRVE QKGSAGIIQA AQNDIVOTGL LDN-SGLIYA --- ---GONOQLK VAQNLKNAQ LAAQNNLNITQ  
baud-09 ---VIAAKT GDV-SLNNIN Q --- ---LINGRVE QKGSAGIIQA AQNDIVOTGL LDN-SGLIYA --- ---GONOQLK VAQNLKNAQ LAAQNNLNITQ  
baud-06 ---VIAAKT GDV-SLNNIN Q --- ---LINGRVE QKGSAGIIQA AQNDIVOTGL LDN-SGLIYA --- ---GONOQLK VAQNLKNAQ LAAQNNLNITQ  
nos-012 ---VIAAKT GDV-SLNNIN Q --- ---LINGRVE QKGSAGIIQA AQNDIVOTGL LDN-SGLIYA --- ---GONOQLK VAQNLKNAQ LAAQNNLNITQ  
baud-010 ALISRKDINN KSGQIIAKQD VTTQSOGLAN DLGQIGSVQV NVSLDAGLGD LSNQSGKTLA AQDLTLSAQN LDNQSGLISA --- ---QKHLAK VQKNNLKGQ IQSGDAIETM  
baud-011 ALISRKDINN TSGQIIAKQD VTTQSOGLAN DLGQIGSVQV NVSLDAGLGD LSNQSGKTLA AQDLTLSAQN LDNQSGLISA --- ---QKHLAK VQKNNLKGQ IQSGDAIETM  
baud-014 ALISRKDINN TSGQIIAKQD VTTQSOGLAN DLGQIGSVQV NVSLDAGLGD LSNQSGKTLA AQDLTLSAQN LDNQSGLISA --- ---QKHLAK VQKNNLKGQ IQSGDAIETM  
baud-012 ALISRKDINN TSGQIIAKQD VTTQSOGLAN DLGQIGSVQV NVSLDAGLGD LSNQSGKTLA AQDLTLSAQN LDNQSGLISA --- ---QKHLAK VQKNNLKGQ IQSGDAIETM  
baud-020 SLSSRKDVNN TSGQIIAKQD VTTQSOGLAN DLGQIGSVQV NVSLDAGLGD LSNQSGKTLA AQDLTLSAQN LDNQSGLISA --- ---QKHLAK VQKNNLKGQ IQSGDAIETM  
baud-015 QAQITQDIDN SEGOIVANKA VLLSSOGLNN NAGLIGSVED IVNINAGSAGV LSNQSGKTLA AQDLTLSAQN LDNQSGLISA --- ---QKHLAK VQKNNLKGQ IQSGDAIETM  
baud-016 SLSSRKDVNN TSGQIIAKQD VTTQSOGLAN DLGQIGSVQV NVSLDAGLGD LSNQSGKTLA AQDLTLSAQN LDNQSGLISA --- ---QKHLAK VQKNNLKGQ IQSGDAIETM  
baud-021 SLSSRKDVNN TSGQIIAKQD VTTQSOGLAN DLGQIGSVQV NVSLDAGLGD LSNQSGKTLA AQDLTLSAQN LDNQSGLISA --- ---QKHLAK VQKNNLKGQ IQSGDAIETM  
baud-019 SLSSRKDVNN TSGQIIAKQD VTTQSOGLAN DLGQIGSVQV NVSLDAGLGD LSNQSGKTLA AQDLTLSAQN LDNQSGLISA --- ---QKHLAK VQKNNLKGQ IQSGDAIETM  
baud-013 ALISRKDINN KSGQIIAKQD VTTQSOGLAN DLGQIGSVQV NVSLDAGLGD LSNQSGKTLA AQDLTLSAQN LDNQSGLISA --- ---QKHLAK VQKNNLKGQ IQSGDAIETM  
cal-023 ALSSRKDVNN TSGQIIAKQD VTTQSOGLAN DLGQIGSVQV NVSLDAGLGD LSNQSGKTLA AQDLTLSAQN LDNQSGLISA --- ---QKHLAK VQKNNLKGQ IQSGDAIETM  
pit-020 SLSSRKDVNN ASGQIIAKQD VTTQSOGLAN DLGQIGSVQV NVSLDAGLGD LSNQSGKTLA AQDLTLSAQN LDNQSGLISA --- ---QKHLAK VQKNNLKGQ IQSGDAIETM  
pit-06 SLSSRKDVNN TSGQIIAKQD VTTQSOGLAN DLGQIGSVQV NVSLDAGLGD LSNQSGKTLA AQDLTLSAQN LDNQSGLISA --- ---QKHLAK VQKNNLKGQ IQSGDAIETM  
baud-017 SLSSRKDVNN TSGQIIAKQD VTTQSOGLAN DLGQIGSVQV NVSLDAGLGD LSNQSGKTLA AQDLTLSAQN LDNQSGLISA --- ---QKHLAK VQKNNLKGQ IQSGDAIETM  
nos-018 QAQINQDIDN SSGQIVANKS VLLSSOGLNN NQGVIASIQD ELNINAGSLA LTNQAGLLQS GRNNILITRG IDNSSGTIDS AGRQLMSGPI QTGOSTLST TPWMLMTAGI IKMGDFHLD  
nos-022 QAQINQDIDN SSGQIVANKS VLLSSOGLNN NQGVIASIQD ELNINAGSLA LTNQAGLLQS GRNNILITRG IDNSSGTIDS AGRQLMSGPI QTGOSTLST PPWMLMTAGI IKMGDFHLD  
baud-02 ---QLSGLTD TQDVAHLNN QSGTIYSKQO DLNLSVSGTD ---NSAGTLAA DONLNLRNG DNLNQAQIRS EN ---ADLKLNI AQDVQNTTGL ISAANKLNLT  
bay-015 ---QIVANGD VQIQSOGLNN SHGQM --- ---GSLQG GLSLNTGSDT LINGSG --- ---ADLKLNI AQDVQNTTGL ISAANKLNLT L IQAKKDITQ

1440  
baud-01 TATLQTSAG SIIAGLSDG SLANQGNLNI DATGAI --- ---NAOQGLIAG GDLSSQAASH VLNQLVQAK NISLNSKSGO LS --- ---AQQSTIQAAQ QLNLTTPDTL  
nos-02 TATLQTSAG SIIAGLSDG SLANQGNLNI DATGAI --- ---NAOQGLIAG GDLSSQAASH VLNQLVQAK NISLNSKSGO LS --- ---AQQSTIQAAQ QLNLTTPDTL  
baud-03 TATLQTSAG SIIAGLSDG SLANQGNLNI DATGAI --- ---NAOQGLIAG GDLSSQAASH VLNQLVQAK NISLNSKSGO LS --- ---AQQSTIQAAQ QLNLTTPDTL  
nos-04 TATLQTSAG SIIAGLSDG SLANQGNLNI DATGAI --- ---NAOQGLIAG GDLSSQAASH VLNQLVQAK NISLNSKSGO LS --- ---AQQSTIQAAQ QLNLTTPDTL  
baud-07 TATLQTSAG SIIAGLSDG SLANQGNLNI DATGAI --- ---NAOQGLIAG GDLSSQAASH VLNQLVQAK NISLNSKSGO LS --- ---AQQSTIQAAQ QLNLTTPDTL  
baud-05 TATLQTSAG SIIAGLSDG SLANQGNLNI DATGAI --- ---NAOQGLIAG GDLSSQAASH VLNQLVQAK NISLNSKSGO LS --- ---AQQSTIQAAQ QLNLTTPDTL  
nos-08 TATLQTSAG SIIAGLSDG SLANQGNLNI DATGAI --- ---NAOQGLIAG GDLSSQAASH VLNQLVQAK NISLNSKSGO LS --- ---AQQSTIQAAQ QLNLTTPDTL  
baud-09 TATLQTSAG SIIAGLSDG SLANQGNLNI DATGAI --- ---NAOQGLIAG GDLSSQAASH VLNQLVQAK NISLNSKSGO LS --- ---AQQSTIQAAQ QLNLTTPDTL  
baud-06 TATLQTSAG SIIAGLSDG SLANQGNLNI DATGAI --- ---NAOQGLIAG GDLSSQAASH VLNQLVQAK NISLNSKSGO LS --- ---AQQSTIQAAQ QLNLTTPDTL



nos-D12 TATLSQTSAG SIIAGLTS DG SLANQGNLNI DATGAI----- -SAQGQLIAG GDLNSQAASH VLNQSLVQAK NISLNSKSGQ LS----- A0QSSIQAAQ QLNLTTPDTL
bau-D10 G0SLN-N0GG SIET--NADL TLNITDALDN S0SGKL-TGN TTKITAGSIN NSNKQINAT DTLTVLSQQA INNQTGVMAA NQNVSIQSQG LDNTS----- G0IGSVQGS L TIDAQKEKLL
bau-D11 G0SLN-N0GG SIET--NADL TLNITDALDN S0SGKL-TGN TTKITAGSIN NSNKQINAT DALTVLSQOE INNQTGVMAA NQNVSIQSQG LDNTS----- G0IGSVQGS L TIDAQKEKLL
bau-D14 G0SLN-N0GG SIET--NADL TLNITDALDN S0SGKL-TGN TTKITAGSIN NSNKQINAT DALTVLSQOE INNQTGVMAA NQNVSIQSQG LDNTS----- G0IGSVQGS L TIDAQKEKLL
bau-D12 G0SLN-N0GG SIET--NADL TLNITDALDN S0SGKL-TGN TTKITAGSIN NSNKQINAT DALTVLSQOE INNQTGVMAA NQNVSIQSQG LDNTS----- G0IGSVQGS L TIDAQKEKLL
bau-D20 G0SLN-N0GG SIET--NADL TLNITDALDN S0SGKL-TGN TTKITAGSIN NSNKQINAT DTLTVLSQGG INNQTGVMAA NQNVSIQSQG LDNTS----- G0IGSVQGS L TIDAQKEKLL
bau-D15 G0KDFN-N0GG LLQ5--GADL NFKLSGLLND S0SGQLASGG NTIIOQAGSVK NSGGKISAQ GVLNIDAVQA IDNQLGTMVA NQDITLTSOG LNSVQ----- G0IGSKNLG MIDVGGQQLS
bau-D16 G0SLN-N0GG SIET--NADL TLNITDALDN S0SGKL-TGN TTKITAGSIN NSNKQINAI DTLTVLSQQA INNQTGVMAA NQNVSIQSQG LDNTS----- G0IGSVQGS L TIDAQKEKLL
bau-D21 G0SLN-N0GG SIET--NADL TLNITDALDN S0SGKL-TGN TTKITAGSIN NSNKQINAI DTLTVLSQQA INNQTGVMAA NQNVSIQSQG LDNTS----- G0IGSVQGS L TIDAQKEKLL
bau-D19 G0SLN-N0GG SIET--NADL TLNITDALDN S0SGKL-TGN TTKITAGSIN NSNKQINAI DTLTVLSQQA INNQTGVMAA NQNVSIQSQG LDNTS----- G0IGSVQGS L TIDAQKEKLL
bau-D13 G0SLN-N0GG SIET--NADL TLNITDALDN S0SGKL-TGN TTKITAGSIN NSNKQINAI DTLTVLSQQA INNQTGVMAA NQNVSIQSQG LDNTS----- G0IGSVQGS L TIDAQKEKLL
cal-D23 G0SLN-N0GG SIET--NADL TLNINAALDN S0SGKL-TGN TTKITAGSIN NSNKQINAT DALTVLSQQA INNQAQVMTA NQNVSIQSQG LDNTG----- G0IGSVQGS L TIDAQKEKLL
pit-D20 G0SLN-N0GG SIET--NADL TLNITDALDN S0SGKL-TGN TTKITAGSIN NSNKQINAT DTLTVLSQGG INNQTGVMAA NQNVSIQSQG LDNTS----- G0IGSVQGS L TIDAQKEKLL
pit-D6 G0SLN-N0GG SIET--NADL TLNITDALDN S0SGKL-TGN TTKITAGSIN NSNKQINAT DTLTVLSQGG INNQTGVMAA NQNVSIQSQG LDNTS----- G0IGSVQGS L TIDAQKEKLL
bau-D17 G0SLN-N0GG SIET--NADL TLNITDALDN S0SGKL-TGN TTKITAGSIN NSNKQINAT DTLTVLSQQA INNQTGVMAA NQNVSIQSQG LDNTS----- G0IGSVQGS L TIDAQKEKLL
nos-D18 ASQFD-NRGG TLQTRQGYDL SLNITGQLDN S0GGQLQSGH DLMIASGSMN NEH--GHLSAQ GLASVKADHG LDNTAGSIIA NADVNVSNQG LNRSTINDQ GTIGSVQGL TVDAGQGLLS
nos-D22 ASQFD-NRGG TLQTRQGYDL SLNITGQLDN S0GGQLQSGH DLMIASGSMN NEH--GHLSAQ GLASVKADHG LDNTAGSIIA NADVNVSNQG LNRSTINDQ GTIGSVQGL TVDAGQGLLS
bau-D2 AKNIT-S0QG KVQSGANANI QLNMF----- DNTEGVVYAE EQLQLSATKG LNTQGIYAA EQSTDIRAGS VINDA----- G0IRSQDQL KLNVOQD--IS
bay-D15 AQRID-N0QG QI----- -TTQG----- -OAEILSQAE IDNLEGAIAA DLDVNIIRSQ LNNK----- G0ISSAQNL TLNAG-----

1441

1560
bau-D1 DTQANLKAN KVQINAKDLN NOSGHIQ0TG LDDTQILLTG DLSNONGQID SLGQKLQINA NNLNNQGLI QSGTADSQI LAIA-----
nos-D2 DTQANLKAN KVQINAKDLN NOSGHIQ0TG LDHTQILLTG DLSNONGQID SLGQKLQINA NNLNNQGLI QSGTADSQI LAIA-----
bau-D3 DTQANLKAN KVQINAKDLN NOSGHIQ0TG LDHTQILLTG DLSNONGQID SLGQKLQINA NNLNNQGLI QSGTADSQI LAIA-----
nos-D4 DTQANLKAN KVQINAKDLN NOSGHIQ0TG LDHTQILLTG DLSNONGQID SLGQKLQINA NNLNNQGLI QSGTADSQI LAIA-----
bau-D7 DTQANLKAN KVQINAKDLN NOSGHIQ0TG LDHTQILLTG DLSNONGQID SLGQKLQINA NNLNNQGLI QSGTADSQI LAIA-----
bau-D5 DTQANLKAN KVQINAKDLN NOSGHIQ0TG LDHTQILLTG DLSNONGQID SLGQKLQINA NNLNNQGLI QSGTAGSOLI LAIA-----
nos-D8 DTQANLKAN KVQINAKDLN NOSGHIQ0TG LDHTQILLTG DLSNONGQID SLGQKLQINA NNLNNQGLI QSGTAGSOLI LAIA-----
bau-D9 DTQANLKAN KVQINAKDLN NOSGHIQ0TG LDHTQILLTG DLSNONGQID SLGQKLQINA NNLNNQGLI QSGTAGSOLI LAIA-----
bau-D6 DTQANLKAN KVQINAKDLN NOSGHIQ0TG LDHTQILLTG DLSNONGQID SLGQKLQINA NNLNNQGLI QSGTAGSOLI LAIA-----
nos-D12 DTQANLKAN KVQINAKDLN NOSGHIQ0TG LDHTQILLTG DLSNONGQID SLGQKLQINA NNLNNQGLI QSGTAGSOLI LAIA-----
bau-D10 NTSGSLQAGT SLKITSGGLN NDSGTI--LA LTDNTITSTD DLSNKAGKIA SNAHTITITQ N-LNNOAGMI QSGSGSALD VINGALDNSQ AGHLLSG---
bau-D11 NTSGSLQAGT SLKITSGGLN NDSGTI--LA LTDNTITSTD DLSNKAGKIA SNAHTITITQ N-LNNOAGMI QSGSGSALD VINGALDNSQ AGHLLSG---
bau-D14 NTSGSLQAGT SLKITSGGLN NDSGTI--LA LTDNTITSTD DLSNKAGKIA SNAHTITITQ N-LNNOAGMI QSGSGSALD VINGALDNSQ AGHLLSG---
bau-D12 NTSGSLQAGT SLKITSGGLN NDSGTI--LA LTDNTITSTD DLSNKAGKIA SNAHTITITQ N-LNNOAGMI QSGSGSALD VINGALDNSQ AGHLLSG---
bau-D20 NTSGSLQAGT SLKITSGGLN NDSGTI--LA LTDNTITSTD DLSNKAGKIA SNAHTITITQ N-LNNOAGMI QSGSGSALD VINGALDNSQ AGHLLSG---
bau-D15 NQAGSLQAGT ELHLQAAGIN NDSGIV--GS LGSNHLSSG DLSNKAGKIA TNATLQVNGQ N-LNNOAGMI QSGSGSALD VINGALDNSQ AGHLLSG---
bau-D16 NTSGSLQAGT SLKITSGGLN NDSGTI--LA LTDNTITSTD DLSNKAGKIA SNAHTITITQ N-LNNOAGMI QSGSGSALD VINGALDNSQ AGHLLSG---
bau-D21 NTSGSLQAGT SLKITSGGLN NDSGTI--LA LTDNTITSTD DLSNKAGKIA SNAHTITITQ N-LNNOAGMI QSGSGSALD VINGALDNSQ AGHLLSG---
bau-D19 NTSGSLQAGT SLKITSGGLN NDSGTI--LA LTDNTITSTD DLSNKAGKIA SNAHTITITQ N-LNNOAGMI QSGSGSALD VINGALDNSQ AGHLLSG---
bau-D13 NTSGSLQAGT SLKITSGGLN NDSGTI--LA LTDNTITSTD DLSNKAGKIA SNAHTITITQ N-LNNOAGMI QSGSGSALD VINGALDNSQ AGHLLSG---
cal-D23 NTSGSLQAGT SLKITSGGLN NDSGTI--LA LTDNTITSTD DLSNKAGKIA SNAHTITITQ N-LNNOAGMI QSGSGSALD VINGALDNSQ AGHLLSG---
pit-D20 NTSGSLQAGT SLKITSGGLN NDSGTI--LA LTDNTITSTD DLSNKAGKIA SNAHTITITQ N-LNNOAGMI QSGSGSALD VINGALDNSQ AGHLLSG---
pit-D6 NTSGSLQAGT SLKITSGGLN NDSGTI--LA LTDNTITSTD DLSNKAGKIA SNAHTITITQ N-LNNOAGMI QSGSGSALD VINGALDNSQ AGHLLSG---
bau-D17 NTSGSLQAGT SLKITSGGLN NDSGTI--LA LTDNTITSTD DLSNKAGKIA SNAHTITITQ N-LNNOAGMI QSGSGSALD VINGALDNSQ AGHLLSG---
nos-D18 NQHGTLQAA RDLNAAID STSGTI--QA QDDIQI ISAT ALNNSGSHV TTAGSIIATA NSLDNQAGLI LSNPQHDITL TVSDLLDNRQ QGQINSGHRI GISAGQLNNS SQGITAQSTA
nos-D22 NQHGTLQAA RDLNAAID STSGTI--QA QDDIQI ISAT ALNNSGSHV TTAGSIIATA NSLDNQAGLI LSNPQHDITL TVSDLLDNRQ QGQINSGHRI GISAGQLNNS SQGITAQSTA
bau-D2 NQNGEISA AK SIELNAQKVS NQKQKV--IA QDDIQI ISAT ALNNSGSHV TTAGSIIATA NSLDNQAGLI LSNPQHDITL TVSDLLDNRQ QGQINSGHRI GISAGQLNNS SQGITAQSTA
bay-D15 --NGTLT-- NQAATI--VS -----GESLNV TAQ-----
--NGTLT-- NQAATI--VS -----GKTLT SAN-----

1561

1680
bau-D1 ----- N TLNNQGNIK TAGSLQTNSS EL--NNDAGTL LSFNGFNINT QQLSNQAGOI
nos-D2 ----- N TLNNQGNIK TAGSLQTNSS EL--NNDAGTL LSFNGFNINT QQLSNQAGOI
bau-D3 ----- N TLNNQGNIK TAGSLQTNSS EL--NNDAGTL LSFNGFNINT QQLSNQAGOI
nos-D4 ----- N TLNNQGNIK TAGSLQTNSS EL--NNDAGTL LSFNGFNINT QQLSNQAGOI
bau-D7 ----- N TLNNQGNIK TAGSLQTNSS EL--NNDAGTL LSFNGFNINT QQLSNQAGOI
bau-D5 ----- N TLNNQGNIK TAGSLQTNSS EL--NNDAGTL LSFNGFNINT QQLSNQAGOI
nos-D8 ----- N TLNNQGNIK TAGSLQTNSS EL--NNDAGTL LSFNGFNINT QQLSNQAGOI
bau-D9 ----- N TLNNQGNIK TAGSLQTNSS EL--NNDAGTL LSFNGFNINT QQLSNQAGOI
bau-D6 ----- N TLNNQGNIK TAGSLQTNSS EL--NNDAGTL LSFNGFNINT QQLSNQAGOI
nos-D12 ----- N TLNNQGNIK TAGSLQTNSS EL--NNDAGTL LSFNGFNINT QQLSNQAGOI
bau-D10 NLKVN----- T LDNSQGGIIS AQDALNIIISA GLINNOAGTL VANQVTLSS KGLNNQGOI
bau-D11 NLKVN----- T LDNSQGGIIS AQDALNIIISA GLINNOAGTL VANQVTLSS KGLNNQGOI
bau-D14 NLKVN----- T LDNSQGGIIS AQDALNIIISA GLINNOAGTL VANQVTLSS KGLNNQGOI
bau-D12 NLKVN----- T LDNSQGGIIS AQDALNIIISA GLINNOAGTL VANQVTLSS KGLNNQGOI
bau-D20 NLKVN----- T LDNSQGGIIS AQDALNIIISA GLINNOAGTL VANQVTLSS KGLNNQGOI
bau-D15 NLQVN----- A LDNSQGGIIS AQDALNIIISA GLINNOAGTL VANQVTLSS KGLNNQGOI
bau-D16 NLQVN----- S LDNSQGGIIS AQDALNIIISA GLINNOAGTL VANQVTLSS EGLNHHQOI
bau-D21 NLKVN----- T LDNSQGGIIS AQDALNIIISA GLINNOAGTL VANQVTLSS KGLNNQGOI
bau-D19 NLQVN----- S LDNSQGGIIS AQDALNIIISA GLINNOAGTL VANQVTLSS EGLNHHQOI
bau-D13 NLKVN----- T LDNSQGGIIS AQDALNIIISA GLINNOAGTL VANQVTLSS KGLNNQGOI
cal-D23 NLQVN----- S LDNSQGGIIS AQDALNIIISA GLINNOAGTL VANQVTLSS EGLNHHQOI
pit-D20 NLKVN----- T LDNSQGGIIS AQDALNIIISA GLINNOAGTL VANQVTLSS KGLNNQGOI
pit-D6 NLKVN----- T LDNSQGGIIS AQDALNIIISA GLINNOAGTL VANQVTLSS KGLNNQGOI
bau-D17 NLQVN----- S LDNSQGGIIS AQDALNIIISA GLINNOAGTL VANQVTLSS EGLNHHQOI
nos-D18 NLNINQDINN NNGSIVAYDD VTTTSSVGNM DAGKISSAKG LLSIDAGTV LSSQVGTQA GTNLTAASA INNTAAGLIS ALNAVTLTST GLINNDGSI IANHDVNTS QGLSNHAGEI
nos-D22 NLNINQDINN NNGSIVAYDD VTTTSSVGNM DAGKISSAKG LLSIDAGTV LSSQVGTQA GTNLTAASA INNTAAGLIS ALNAVTLTST GLINNDGSI IANHDVNTS QGLSNHAGEI
bau-D2 ----- Q VD--SIEGTIY AKQELHLTVA DDFNNOGTAI NQNTSAGTI KANLNNTAGKI
bay-D15 ----- Q LDNSNHQIIN SQNNADISIV KDIINNTSGVI AAKQQLILSS QGLNNTTGOI

1681

1800
bau-D1 -----VE AGTQ-----
nos-D2 -----VE AGTQ-----
bau-D3 -----VE AGTQ-----
nos-D4 -----VE AGTQ-----
bau-D7 -----VE AGTQ-----
bau-D5 -----VE AGTQ-----
nos-D8 -----VE AGTQ-----
bau-D9 -----VE AGTQ-----
bau-D6 -----VE AGTQ-----
nos-D12 -----VE AGTQ-----
bau-D10 GSIQGGLAID AGDQALTNQS GVLOAKTDLT AKALSIDSTE GOIISQAKID LQSLKEINNO QGIISADQGI QVKSTGLNNS LGQISSAQGE IVLNAGQGLL SNOTGKIIAG QALQLTADQF
bau-D11 GSIQGGLAID AGDQALTNQS GVLOAKTDLT AKALSIDSTE GOIISQAKID LQSLKEINNO QGIISADQGI QVKSTGLNNS LGQISSAQGE IVLNAGQGLL SNOTGKIIAG QALQLTADQF
bau-D14 GSIQGGLAID AGDQALTNQS GVLOAKTDLT AKALSIDSTE GOIISQAKID LQSLKEINNO QGIISADQGI QVKSTGLNNS LGQISSAQGE IVLNAGQGLL SNOTGKIIAG QALQLTADQF
bau-D12 GSIQGGLAID AGDQALTNQS GVLOAKTDLT AKALSIDSTE GOIISQAKID LQSLKEINNO QGIISADQGI QVKSTGLNNS LGQISSAQGE IVLNAGQGLL SNOTGKIIAG QALQLTADQF
bau-D20 GSIQGGLAID AGDQALTNQS GVLOAKTDLT AKALSIDSTE GOIISQAKID LQSLKEINNO QGIISADQGI QVKSTGLNNS LGQISSAQGE IVLNAGQGLL SNOTGKIIAG QALQLTADQF
bau-D15 GSIQGGTVD TGNQALSNKA GTLQAKTDLT AKALSIDSTE GOIISQAKID LQSLKEINNO QGIISADQGI QVNSQGLNNS LGNISSAQGN IVLNAGQGVV SNOTGKVIAG QALQLSAGOV
bau-D16 GSIQGGLAID AGDQALTNQS GILQAKSDVT IKALSIDSTE GOIISQAKVD VQSQKEVNNQ QGLISADQGI QVNSQGLNNS LGNISSAQGN IVLNAGQGVV SNOTGKVIAG QALQLSAGOV
bau-D21 GSIQGGLAID AGDQALTNQS GVLOAKTDLT AKALSIDSTE GOIISQAKID LQSLKEINNO QGIISADQGI QVNSQGLNNS LGNISSAQGN IVLNAGQGVV SNOTGKVIAG QALQLSAGOV
bau-D19 GSIQGGLAID AGDQALTNQS GILQAKSDVT IKALSIDSTE GOIISQAKVD VQSQKEVNNQ QGLISADQGI QVNSQGLNNS LGNISSAQGN IVLNAGQGVV SNOTGKVIAG QALQLSAGOV
bau-D13 GSIQGGVLD AGDQALTNQS GVLOAKTDLT AKALS-----
cal-D23 GSIQGGVLD SGLDALTQS GVLOAKTDLT AKALS-----
pit-D20 GSIQGGVLD VGDQALTNQS GVLOAKTDLT AKALS-----
pit-D6 GSIQGGVLD AGDQALTNQS GVLOAKTDLT AKALS-----
bau-D17 GSIQGGVLD AGDQALTNQS GILQAKTDLT GKALS-----
nos-D18 GSIITGVNAN AGNAALSQNS GRIQAATAIA LTAVGIDNTA GNISSQGTAT VDSRQIITNO SGRLIAHDNL NVSSEGLNNS MGQIGSANGL LNLNTGNGAL SRSRSGKQAA TAAVTIAHDI
nos-D22 GSIITGVNAN AGNAALSQNS GRIQAATAIA LTAVGIDNTA GNISSQGTAT VDSRQIITNO SGRLIAHDNL NVSSEGLNNS MGQIGSANGL LNLNTGNGAL SRSRSGKQAA TAAVTIAHDI
bau-D2 RS-----
bay-D15 -----

1801

1920
bau-D1 -----
nos-D2 -----
bau-D3 -----
nos-D4 -----



Table with columns for identifiers (bau-D1 to bay-D15), a central column with dashes, and a right column with numbers (2281, 2400). Includes entries like QOGLVGSVSG ALNIDAGQGL LNNQOQGQL AATTADLKA...

Table with columns for identifiers (bau-D1 to bay-D15), a central column with dashes, and a right column with numbers (2401, 2520). Includes entries like LYSGGQTTIK AASVDNSAQ QINSQGLNI TTAQDINNTE GVIIVATKQMQ LKSQGLENTA...

Table with columns for identifiers (bau-D1 to bay-D15), a central column with dashes, and a right column with numbers (2521, 2640). Includes entries like NDITIIQTQGT LGNQNHGQIV SATGNINATA NGLNNOQGLI ETYLNHDIDL TLKDTLDNSQ...

Table with columns for identifiers (bau-D1 to bay-D15), a central column with dashes, and a right column with numbers (2641, 2760). Includes entries like QAGIIQSGEQ ANLIDLINGV LNNQAGQIHG GANTQIHANS INNSOQGOIS AQDALNIISA GLVDNQ-AGQ...

nos-D18 DSGLIGSAGS QLQVDAGSGS LTNHAGQLLS AGNMDLHAAG IDNSGQGEIN TQOQLNINSD QVLSNSDAGO IAIAKQDLSIH SDGLDNYNAG RIGSQQGLMN LNIGTGLLNN SQOGLLQAAT  
nos-D22 DSGLIGSAGS QLQVDAGLGS LTNHAGQLLS AGNMDLHAAG IDNSGQGEIN TQOQLNINSD QVLSNSDAGO IAIAKQDLSIH SDGLDNYNAG RIGSQQGLMN LNIGTGLLNN SQOGLLQAAT  
bau-D2  
bay-D15

2761

2880

bau-D1 ---DNIVNQ LIVKNLNNS NGKIQTNNHL ETQAGALKNN TGSI  
nos-D2 ---DNIVNQ LIVKNLNNS NGKIQTNNHL ETQAGALKNN TGSI  
bau-D3 ---DNIVNQ LIVKNLNNS NGKIQTNNHL ETQADALKNN AGSI  
nos-D4 ---DNIVNQ LIVKNLNNS NGKIQTNNHL ETQAGALKNN MGSI  
bau-D7 ---DNIVNQ LIVKNLNNS NGKIQTNNHL ETQADALKNN AGSI  
bau-D5 ---DNIVNQ LIVKNLNNS NGKIQTNNHL ETQADALKNN AGSI  
nos-D8 ---DNIVNQ LIVKNLNNS NGKIQTNNHL ETQAGALKNN TGSI  
bau-D9 ---DNIVNQ LIVKNLNNS NGKIQTNNHL ETQADALKNN AGSI  
bau-D6 ---DNIVNQ LIVKNLNNS NGKIQTNNHL ETQADALKNN AGSI  
nos-D12 ---DNIVNQ LIVKNLNNS NGKIQTNNHL ETQAGALKNN TGSI  
bau-D10 DVSVKALSID NT----V GQINTQGNIN LLSQOSINNT QGVIVGDQSI NINSQGLNNN QGQI  
bau-D11 DVAVKALSVD NT----A GQINTPGGID LVSQOINNT QGSIVGDQRL NLKAQGLNNN QGQI  
bau-D14 DVAVKALSVD NT----A GQINTPGGID LVSQOINNT QGSIVGDQRL NLKAQGLNNN QGQI  
bau-D12 DVAVKALSVD NT----A GQINTPGGID LVSQOINNT QGSIVGDQRL NLKAQGLNNN QGQI  
bau-D20 DVAVKALSVD NT----A GQINTPGGID LVSQOINNT QGSIVGDQRL NLKAQGLNNN QGQI  
bau-D15 DIAVKALSVD NS----A GQINTQGGID LVSQOINNT QGSIVGDQSI NINSQGLNNN QGQI  
bau-D16 DVSVKALSID NT----A GQINTQGNIN LLSQOSINNT QGVIVGDQSI NINSQGLNNN QGQI  
bau-D21 DVSVKALSID NT----A GQINTQGNIN LLSQOSINNT QGVIVGDQSI NINSQGLNNN QGQI  
bau-D19 DVSVKALSID NT----A GQINTQGNIN LLSQOSINNT QGVIVGDQSI NINSQGLNNN QGQI  
bau-D13 ---VD NT----A GHFSAQKID LTSQQTINNT QGSIVADQNL NIHSQGLINN QGKL  
cal-D23 ---VD NT----A GHFSAQKID LNSQQTINNT QGSIVADQNL NMHSQGLINN QGKL  
pit-D20 ---VD NT----A GHFSAQKID LTSQKNINNT QGSIVADQNL NIHSQGLINN QGKL  
pit-D6 ---VE NT----A GHISAQKID LNSQKNINNT QGSIVADQNL NIHSQGLINN QGKL  
bau-D17 ---VD NT----A GHFSAQKID LTSQQTINNT QGSIVADQNL NIHSQGLINN QGKL  
nos-D18 DLNIESGSDI NSHTLSAAQS NGIKAGGKLO LISQOSLNNO QGATVAGKTL SHSTEVNND QGLMNSLDDL GIVTSGALTN QHGQLQSATN LSIESESLNN DHGDLQAQNT LAVSINQETIN  
nos-D22 DLNIESGSDI NSHTLSAAQS NGIKAGGKLO LISQOSLNNO QGATVAGKTL SHSTEVNND QGLMNSLDDL GIVTSGALTN QHGQLQSATN LSIESESLNN DHGDLQAQNT LAVSINQETIN  
bau-D2 ---EQNLQD LNVQNLDNQ TQIYAGSQA NIHTTELNNO QGTI  
bay-D15 ---GTV

2881

3000

bau-D1 ---VTA GTAGLNLNTA SRLDNQSGNI HSSGDLNIKA QDILND-QGO ILAAKNAQFN SQNTLSNQ  
nos-D2 ---VTA GTAGLNLNTA SRLDNQSGNI HSSGDLNIKA QDILND-QGO ILAAKNAQFN SQNTLSNQ  
bau-D3 ---VTA GAAGLNLNTT SRLDNQSGNI RSSGDLNVNA QDILND-QGO ILAAKNAQFN SQNTLSNQ  
nos-D4 ---VTA GTAGLNLNTA SRLDNQSGNI HSSGDLNIKA QDILND-QGO ILAAKNAQFN SQNTLSNQ  
bau-D7 ---VTA GTAGLNLNTT SRLDNQSGNI RSSGDLNVNA QDILND-QGO ILAAKNAQFN SQNTLSNQ  
nos-D5 ---VTA GAAGLNLNTT SRLDNQSGNI RSSGDLNVNA QDILND-QGO ILAAKNAQFN SQNTLSNQ  
nos-D8 ---VTA GTAGLNLNTA SRLDNQSGNI HSSGDLNIKA QDILND-QGO ILAAKNAQFN SQNTLSNQ  
bau-D9 ---VTA GAAGLNLNTT SRLDNQSGNI RSSGDLNVNA QDILND-QGO ILAAKNAQFN SQNTLSNQ  
bau-D6 ---VTA GAAGLNLNTT SRLDNQSGNI RSSGDLNVNA QDILND-QGO ILAAKNAQFN SQNTLSNQ  
nos-D12 ---VTA GTAGLNLNTA SRLDNQSGNI RSSGDLNVNA QDILND-QGO ILAAKNAQFN SQNTLSNQ  
bau-D10 GTQ GDLTVQAGTQ V-LQNTGTL QAGQNLNISA AADNLLSGO INAQGSAILQ STGLVNNQ  
bau-D11 GTQ GDLNLVSGSG 5-LQNTGTL QAGQNIIVDA AADNSSTGK INAQGNVTLQ STGLINNE  
bau-D14 GTQ GDLNLVSGSG 5-LQNTGTL QAGQNIIVDA AADNSSTGK INAQGNVTLQ STGLINNE  
bau-D12 GTQ GDLNLVSGSG 5-LQNTGTL QAGQNIIVDA AADNSSTGK INAQGNVTLQ STGLINNE  
nos-D20 GTQ GDLNLVSGSG 5-LQNTGTL QAGQNIIVDA AADNSSTGK INAQGNVTLQ STGLINNE  
bau-D15 GTQ GDLTVQAGTQ V-LQNTGTL QAGQNLNISA AADNSLSGK INAQGSVALQ STGLINNE  
bau-D16 GTQ GDLTVQAGTQ V-LQNTGTL QAGQNLNISA AADNLLSGO INAQGSAILQ STGLVNNQ  
bau-D21 GTQ GDLTVQAGTQ V-LQNTGTL QAGQNLNISA AADNLLSGO INAQGSAILQ STGLVNNQ  
bau-D19 GTQ GDLTVQAGTQ V-LQNTGTL QAGQNLNISA AADNLLSGO INAQGSAILQ STGLVNNQ  
bau-D13 ---ATO GNLTVOAGTQ A-LKNOAGII QSGQDMSVIA ASIDNSLSGO INAQGSATLQ STGLLNNE  
cal-D23 ---ATO GNLTVOAGTQ A-LKNOAGII QSGQDMSVIA ASIDNSLSGO INAQGSATLQ STGLLNNE  
pit-D20 ---ATO GNLTVOAGTQ A-LKNOAGII QSGQDMSVIA ASIDNSLSGO INAQGSATLQ STGLLNNE  
pit-D6 ---ATO GNLTVOAGTQ A-LKNOAGII QSGQDMSVIA ASIDNSLSGO INAQGSATLQ STGLLNNE  
bau-D17 ---ATO GNLTVOAGTQ A-LKNOAGII QSGQDMSVIA ASIDNSLSGO INAQGSATLQ STGLLNNE  
nos-D18 NVGGHIAAFN DVNLHNSGLN NNAVNSAAGS MDVSQIGSVY SMLNIDAGRG A-LTNOGSSL QAGRSITLSA DGDIDSSNGGY IHAVQNIELN SQHRLNNDYQ QIVADSGSIV SQSSDLSNLG  
nos-D22 NVGGHIAAFN DVNLHNSGLN NNAVNSAAGS MDVSQIGSVY SMLNIDAGRG A-LTNOGSSL QAGRSITLSA DGDIDSSNGGY IHAVQNIELN SQHRLNNDYQ QIVADSGSIV SQSSDLSNLG  
bau-D2 ---Y SQNLQDLIAS Q-LNNOQGOI YSG  
bay-D15 ---Q GNHLIDAGSQ L-LNNOQGOI QSG

3001

3120

bau-D1 ---GLIAAQQQLM IQSAAALNQA GQIGSVADGV NIQTTOQALN NOSGKIQAQ  
nos-D2 ---GLIAAQQQLM IQSAAALNQA GQIGSVADGV NIQTTOQALN NOSGKIQAQ  
bau-D3 ---GLIAAQQQLM IQSAAALNQA GQIGSVADGV NIQTTOQALN NOSGKIQAQ  
nos-D4 ---GLIAAQQQLM IQSAAALNQA GQIGSVADGV NIQTTOQALN NOSGKIQAQ  
bau-D7 ---GLIAAQQQLM IQSAAALNQA GQIGSVADGV NIQTTOQALN NOSGKIQAQ  
nos-D5 ---GLIAAQQQIM IQSAAALNQA GQIGSVADGV NIQTTOQALN NOSGKIQAQ  
nos-D8 ---GLIAAQQQLM IQSAAALNQA GQIGSVADGV NIQTTOQALN NOSGKIQAQ  
bau-D9 ---GLIAAQQQLM IQSAAALNQA GQIGSVADGV NIQTTOQALN NOSGKIQAQ  
nos-D12 ---GLIAAQQQLM IQSAAALNQA GQIGSVADGV NIQTTOQALN NOSGKIQAQ  
bau-D10 ---T GITANQDIT LTSQGLNNTQ GQIGSVVGLS NLD5GQOILN NOSGSLLSGH  
bau-D11 ---T GVIAANQDVT LTGQGLNNTQ GQIGSVAGSL NLD5GQOILN NOSGSLLSNN  
bau-D14 ---T GVIAANQDVT LTGQGLNNTQ GQIGSVAGSL NLD5GQOILN NOSGSLLSNN  
bau-D12 ---T GVIAANQDVT LTGQGLNNTQ GQIGSVAGSL NLD5GQOILN NOSGSLLSNN  
bau-D20 ---T GVIAANQDVT LTGQGLNNTQ GQIGSVAGSL NLD5GQOILN NOSGSLLSNN  
bau-D15 ---T GVIAANQDVM LTSQGLNNTQ GQIGSVVGLS NLD5GQOILN NOSGSLLSGH  
bau-D16 ---T GITANQDIT LTSQGLNNTQ GQIGSVVGLS NLD5GQOILN NOSGSLLSGH  
bau-D21 ---T GITANQDIT LTSQGLNNTQ GQIGSVVGLS NLD5GQOILN NOSGSLLSGH  
bau-D19 ---T GITANQDIT LTSQGLNNTQ GQIGSVVGLS NLD5GQOILN NOSGSLLSGH  
bau-D13 ---T GVLAAGQDLT LNGNGLNNAK KIGISVNGAL NINAGSLLN NOSGSLQ5AG  
cal-D23 ---T GVLAAGQDLT LNGNGLNNAK KIGISVNGAL NINAGSLLN NOSGSLQ5AG  
pit-D20 ---T GVLAAGQDLT LNGNGLNNAK KIGISVNGAL NINAGSLLN NOSGSLQ5AG  
pit-D6 ---T GVLAAGQDLT LNGNGLNNAK KIGISVNGAL NINAGSLLN NOSGSLQ5AG  
bau-D17 ---T GVLAAGQDLT LNGNGLNNTK KIGISVNGAL NINAGSLLN NOSGSLQ5AG  
nos-D18 ---K GIAAANNVT VNSNGLINDT GHIQSVNGDL NVDAGSGLV NQRGDLQ5GQ  
nos-D22 ---K GIAAANNVT VNSNGLINDT GHIQSVNGDL NVDAGSGLV NQRGDLQ5GQ  
bau-D2 ---K GVLAAGQDLT INNSAGLDNTA GTRISENADI TLNAQQGLIN AQ-GDIYAGH  
bay-D15 ---QDLN LNATGIDNT

3121

3240

bau-D1 ATNLDVQGLD NSLQGLISST KGDQSKIQID THQOQLNNO GQINSQNTLQ ISTNSLNNOQ -GLITAOQDL GINAVQLIDN RQTYLNATLP ELAAGIQSLG QVLLQT-SEL NNEEQGVIAQ  
nos-D2 ATNLDVQGLD NSLQGLISST KGDQSKIQID THQOQLNNO GQINSQNTLQ ISTNSLNNOQ -GLITAOQDL GINAVQLIDN RQTYLNATLP ELAAGIQSLG QVLLQT-SEL NNEEQGVIAQ  
nos-D3 ATNLDVQGLD NSLQGLISST KGDQSKIQID THQOQLNNO GQINSQNTLQ ISTNSLNNOQ -GLITAOQDL GINAVQLIDN RQTYLNATLP ELAAGIQSLG QVLLQT-SEL NNEEQGVIAQ  
nos-D4 ATNLDVQGLD NSLQGLISST KGDQSKIQID THQOQLNNO GQINSQNTLQ ISTNSLNNOQ -GLITAOQDL GINAVQLIDN RQTYLNATLP ELAAGIQSLG QVLLQT-SEL NNEEQGVIAQ  
bau-D7 ATNLDVQGLD NSLQGLISST KGDQSKIQID THQOQLNNO GQINSQNTLQ ISTNSLNNOQ -GLITAOQDL GINAVQLIDN RQTYLNATLP ELAAGIQSLG QVLLQT-SEL NNEEQGVIAQ  
nos-D5 ATNLDVQGLD NSLQGLISST KGDQSKIQID THQOQLNNO GQINSQNTLQ ISTNSLNNOQ -GLITAOQDL GINAVQLIDN RQTYLNATLP ELAAGIQSLG QVLLQT-SEL NNEEQGVIAQ  
nos-D8 ATNLDVQGLD NSLQGLISST KGDQSKIQID THQOQLNNO GQINSQNTLQ ISTNSLNNOQ -GLITAOQDL GINAVQLIDN RQTYLNATLP ELAAGIQSLG QVLLQT-SEL NNEEQGVIAQ  
bau-D9 ATNLDVQGLD NSLQGLISST KGDQSKIQID THQOQLNNO GQINSQNTLQ ISTNSLNNOQ -GLITAOQDL GINAVQLIDN RQTYLNATLP ELAAGIQSLG QVLLQT-SEL NNEEQGVIAQ  
nos-D12 ATNLDVQGLD NSLQGLISST KGDQSKIQID THQOQLNNO GQINSQNTLQ ISTNSLNNOQ -GLITAOQDL GINAVQLIDN RQTYLNATLP ELAAGIQSLG QVLLQT-SEL NNEEQGVIAQ  
bau-D10 QINIHAAGLN NTQGOIVA---QQLLDID AELQALNNOQ GLISS-DTVN ITSGLLNNDQ -GLIQSNSAM ---TIDT QGHLINTNS GTQGGLLSQ NLSLKNVGLL DNKLGYLASG  
bau-D11 QISIHATGLN NSQGOIVA---QQLLDID AELQALNNOQ GLISS-DTVN ITSGLLNNDQ -GLIQSNSAM ---TIDT QGHLINTNS GTQGGLLSQ NLSLKNVGLL DNKLGYLASG  
bau-D14 QISIHATGLN NSQGOIVA---QQLLDID AELQALNNOQ GLISS-DTVN ITSGLLNNDQ -GLIQSNSAM ---TIDT QGHLINTNS GTQGGLLSQ NLSLKNVGLL DNKLGYLASG  
bau-D12 QISIHATGLN NSQGOIVA---QQLLDID AELQALNNOQ GLISS-DTVN ITSGLLNNDQ -GLIQSNSAM ---TIDT QGHLINTNS GTQGGLLSQ NLSLKNVGLL DNKLGYLASG  
bau-D20 QISIHATGLN NSQGOIVA---QQLLDID AELQALNNOQ GLISS-DTVN ITSGLLNNDQ -GLIQSNSAM ---TIDT QGHLINTNS GTQGGLLSQ NLSLKNVGLL DNKLGYLASG  
bau-D15 QISIHATGLN NSQGOIVA---QQLLDID AELQALNNOQ GLISS-DTVN ITSGAFNNDQ -GLVQAKTSL ---VLDT NGQNLVNSNS GTQGGLLSQ NLSLKNVGLL DNKLGYLASG  
bau-D16 QINIHAAGLN NTQGOIVA---QQLLDID AELQALNNOQ GLISS-DTVN ITSGLLNNDQ -GLIQSNSAM ---MIDT QGQSLINTNS GTQGGLLSQ NLSLKNVGLL DNKLGYLASG  
bau-D21 QINIHAAGLN NTQGOIVA---QQLLDID AELQALNNOQ GLISS-DTVN ITSGLLNNDQ -GLIQSNSAM ---TIDT QGHLINTNS GTQGGLLSQ NLSLKNVGLL DNKLGYLASG  
bau-D19 QINIHAAGLN NTQGOIVA---QQLLDID AELQALNNOQ GLISS-DTVN ITSGLLNNDQ -GLIQSNSAM ---MIDT QGQSLINTNS GTQGGLLSQ NLSLKNVGLL DNKLGYLASG

baud-13 VIDLKAGVW NQLGKITS ---LKAIND S00QAFNTQQ GTISS-DLVS ISSGLFNDDQ -GLVQAKTSL -----VLDT NGQNLVNTNS GTQGGLLSQG NLTLLKNSAL DNTQGYIASS  
cal-023 VIDLKAGVW NQLGKITS ---LKAIND S00QAFNTQQ GTISS-DLVS ISSGLFNDDQ -GLVQAKTSL -----VLDT NGQNLVNTNS GTQGGLLSQG NLTLLKNSAL DNTQGYIASS  
pit-020 VIDLKAGVW NQLGKITS ---LTAIND S00QAFNTQQ GTISS-DQIS ILSGPFNDDQ -GLVQAKTSL -----VLDT NGQNLVNTNS GTQGGLLSQG NLTLLKNSAL DNTQGYIASS  
pit-06 VIDLKAGVW NQLGKITS ---LTAIND S00QAFNTQQ GTISS-DQIS ILSGPFNDDQ -GLVQAKTSL -----VLDT NGQNLVNTNS GTQGGLLSQG NLTLLKNSAL DNTQGYIASS  
bau-017 VIDVQAGVW NQLGKITS ---LKAIND S00QAFNTQQ GTISS-DLVS ISSGLFNDDQ -GLVQAKTSL -----VLDT NGQNLVNTNS GTQGGLLSQG NLTLLKNSAL DNTQGYIASS  
nos-018 NASIAATGID NQTGHIFA ---NQALSID SRGQALQNOQ GOING-TGVQ ILSGALDNGO SGLTOSGALL ---SINT HQQALNNONS GDTGGLSRRG DLTLLNISOQL DNTSGYIASS  
nos-022 NASIAATGID NQTGHIFA ---NQALSID SRGQALQNOQ GOISG-TGVQ ILSGALDNGO SGLTOSGALL ---SINT HQQALNNONS GDTGGLSRRG DLTLLNISOQL DNTSGYIASS  
bau-02 NASLNSVGLD NSSGQIAA ---NQQLTID TQKQQLSNQ AKITA-RAVD LKTGKLDNQT -GLTQAEQSV -----KIDT QNALNNNS GNNAGLSQG GLDTANVSOL ENSNGYIAAI  
bay-015 ---QGQISS ---KNQLQLD SREQLLNRLO RFLSA-ENLT IDSJELNDDQ -GLTQAEQSV -----QIDT HQHNLNNTNS GAQGGLLSQG NIQLNNTQTL DNQOQYIASS

3241

baud-01 NGLTIAQPKV NNSNAGLLAS G0DLLIDSVG QA-GTINNO KKGISANONI SLNTGLMS- GSQLDNSQQG FISAQKVKI ISQNDNSNN DQN----- OGIQAGQIEI AASTLNNASG  
nos-02 NGLTIAQPKV NNSNAGLLAS G0DLLIDSVG QA-GTINNO KKGISANONI SLNTGLIS- GSQLDNSQQG LISAAKVKI VSONDNSNN DQN----- OGIQAGQIEI AASTLNNSSG  
bau-03 NGLTIAQPKV NNSNAGLLAS G0DLLIDSVG QA-GTINNO KKGISANONI SLNTGLMS- GSQLDNSQQG LISAAKVKI ISQNDNSNN DQN----- OGIQAGQIEI AASTLNNASG  
nos-04 NGLTIAQPKV NNSNAGLLAS G0DLLIDSVG QA-GTINNO KKGISANONI SLNTGLMT- GSQLDNSQQG LISAAKVKI VSONDNSNN DQN----- OGIQAGQIEI AASTLNNASG  
bau-07 NGLTIAQPKV NNSNAGLLAS G0DLLIDSVG QA-GTINNO KKGISANONI SLNTGLMS- GSQLDNSQQG LISAAKVKI ISQNDNSNN DQN----- OGIQAGQIEI AASTLNNASG  
bau-05 NGLTIAQPKV NNSNAGLLAS G0DLLIDSVG QA-GTINNO KKGISANONI SLNTGLMS- GSQLDNSQQG LISAAKVKI ISQNDNSNN DQN----- OGIQAGQIEI AASTLNNASG  
nos-08 NGLTIAQPKV NNSNAGLLAS G0DLLIDSVG QA-GTINNO KKGISANONI SLNTGLIS- GSQLDNSQQG LISAAKVKI VSONDNSNN DQN----- OGIQAGQIEI AASTLNNASG  
bau-09 NGLTIAQPKV NNSNAGLLAS G0DLLIDSVG QA-GTINNO KKGISANONI SLNTGLMS- GSQLDNSQQG FISAQKVKI ISQNDNSNN DQN----- OGIQAGQIEI AASTLNNASG  
bau-06 NGLTIAQPKV NNSNAGLLAS G0DLLIDSVG QA-GTINNO KKGISANONI SLNTGLMS- GSQLDNSQQG LISAAKVKI ISQNDNSNN DQN----- OGIQAGQIEI AASTLNNASG  
nos-012 NGLTIAQPKV NNSNAGLLAS G0DLLIDSVG QA-GTINNO KKGISANONI SLNTGLMS- GSQLDNSQQG LISAAKVKI ISQNDNSNN DQN----- OGIQAGQIEI AASTLNNASG  
bau-010 NGLDISANOV QNSGGTLAA -ONLKLQIGI QN-QLLNNO SQGLSMGDM QLSVEHINNO GKLASTDADS HIMATGOLDI QTQQLDNQNT -LVA DT- -V OGIQAGQIEI AASTLNNSSG  
bau-011 NGLDISANOV QNSGGTLAA -ONLKLQIGI QN-QLLNNO SQGLSMGDM QLSVEHINNO GKLASTDADS HIMATGOLDI QTQQLDNQNT -LVA DT- -V OGIQAGQIEI AASTLNNSSG  
bau-014 NGLDISANOV QNSGGTLAA -ONLKLQIGI QN-QLLNNO SQGLSMGDM QLSVEHINNO GKLASTDADS HIMATGOLDI QTQQLDNQNT -LVA DT- -V OGIQAGQIEI AASTLNNSSG  
bau-012 NGLDISANOV QNSGGTLAA -ONLKLQIGI QN-QLLNNO SQGLSMGDM QLSVEHINNO GKLASTDADS HIMATGOLDI QTQQLDNQNT -LVA DT- -V OGIQAGQIEI AASTLNNSSG  
bau-020 NGLDISANOV QNSGGTLAA -ONLKLQIGI QN-QLLNNO SQGLSMGDM QLSVEHINNO GKLASTDADS HIMATGOLDI QTQQLDNQNT -LVA DT- -V OGIQAGQIEI AASTLNNSSG  
bau-015 NGLDISANOV QNSGGTLAA -ONLKLQIGI QN-QLLNNO SQGLSMGDM QLSVEHINNO GKLASTDADS HIMATGOLDI QTQQLDNQNT -LVA DT- -V OGIQAGQIEI AASTLNNSSG  
bau-016 NGLDISANOV QNSGGTLAA -ONLKLQIGI QN-QLLNNO SQGLSMGDM QLSVEHINNO GKLASTDADS HIMATGOLDI QTQQLDNQNT -LVA DT- -V OGIQAGQIEI AASTLNNSSG  
bau-021 NGLDISANOV QNSGGTLAA -ONLKLQIGI QN-QLLNNO SQGLSMGDM QLSVEHINNO GKLASTDADS HIMATGOLDI QTQQLDNQNT -LVA DT- -V OGIQAGQIEI AASTLNNSSG  
bau-019 NGLDISANOV QNSGGTLAA -ONLKLQIGI QN-QLLNNO SQGLSMGDM QLSVEHINNO GKLASTDADS HIMATGOLDI QTQQLDNQNT -LVA DT- -V OGIQAGQIEI AASTLNNSSG  
bau-013 NGLDISANOV INNKGTLLAT -ONLKLQIGI QN-QLLNNO SQGLSMGDM QLSVEHINNO GKLASTDADS HIMATGOLDI QTQQLDNQNT -LVA DT- -V OGIQAGQIEI AASTLNNSSG  
cal-023 NGLDISANOV INNKGTLLAT -ONLKLQIGI QN-QLLNNO SQGLSMGDM QLSVEHINNO GKLASTDADS HIMATGOLDI QTQQLDNQNT -LVA DT- -V OGIQAGQIEI AASTLNNSSG  
pit-020 NGLDISANOV INNKGTLLAT -ONLKLQIGI QN-QLLNNO SQGLSMGDM QLSVEHINNO GKLASTDADS HIMATGOLDI QTQQLDNQNT -LVA DT- -V OGIQAGQIEI AASTLNNSSG  
pit-06 NGLDISANOV INNKGTLLAT -ONLKLQIGI QN-QLLNNO SQGLSMGDM QLSVEHINNO GKLASTDADS HIMATGOLDI QTQQLDNQNT -LVA DT- -V OGIQAGQIEI AASTLNNSSG  
bau-017 NGLDISANOV INNKGTLLAT -ONLKLQIGI QN-QLLNNO SQGLSMGDM QLSVEHINNO GKLASTDADS HIMATGOLDI QTQQLDNQNT -LVA DT- -V OGIQAGQIEI AASTLNNSSG  
nos-018 NDLNGVNDV LNSHGQLAA -HDNLQSNQ ASGSMLLNDQ SQVNAQHDI SVHFDSINNO G-----G HLVAANQLNL TSNVLDNQT NNINLGT----- OGIQATTVNL NVNSLNNSSG  
nos-022 NDLNGVNDV LNSHGQLAA -HDNLQSNQ ASGSMLLNDQ SQVNAQHDI SVHFDSINNO G-----G HLVAANQLNL TSNVLDNQT NNINLGT----- OGIQATTVNL NVNSLNNSSG  
bau-02 GSANLTAQNI NNSGQINSQ AG-LTTLQOQL AG-GRINDV AGQVLAQNI SLNADITNNA GTV-----S HIIAGEKTLA NASKVMNEQT KDSN-----LL GGLHAKTIEI NAGSLNNSSG  
bay-015 QQLDLQANOV FNQNGTLAA -KQLNLQIGI QN-QLLNNO SQGLSMGDM NLDIDQINNK GKANTADADS HIMAGELNI TTQQLDNQNT LNTDPANTSI OGIQANTLVN TSKVLLNNSSG

3360

3361

baud-01 RISAEQQLNL NLDNLNNTK GLISSDLQTL IOGQDNNRRL IVNNOQGTII AGEESSTAG LNILAKGLTG DGKVLSSQGL NLQLNDYVQ DAQ-GQLQA OGNLNLSSKG KVTNHAIGAKS  
nos-02 RISAEQQLNL NLDNLNNTK GLISSDLQTL IOGQDNNRRL IVNNOQGTII AGEESSTAG LNILAKGLTG DGKVLSSQGL NLQLNDYVQ NAQ-GQLQA OGNLNLSSKG KVTNHAIGAKS  
bau-03 RISAEQQLNL NLDNLNNTK GLISSDLQTL IOGQDNNRRL IVNNOQGTII AGEESSTAG LNILAKGLTG DGKVLSSQGL NLQLNDYVQ DAQ-GQLQA OGNLNLSSKG KVTNHAIGAKS  
nos-04 RISAEQQLNL NLDNLNNTK GLISSDLQTL IOGQDNNRRL IVNNOQGTII AGEESSTAG LNILAKGLTG DGKVLSSQGL NLQLNDYVQ DAQ-GQLQA OGNLNLSSKG KVTNHAIGAKS  
bau-07 RISAEQQLNL NLDNLNNTK GLISSDLQTL IOGQDNNRRL IVNNOQGTII AGEESSTAG LNILAKGLTG DGKVLSSQGL NLQLNDYVQ DAQ-GQLQA OGNLNLSSKG KVTNHAIGAKS  
bau-05 RISAEQQLNL NLDNLNNTK GLISSDLQTL IOGQDNNRRL IVNNOQGTII AGEESSTAG LNILAKGLTG DGKVLSSQGL NLQLNDYVQ DAQ-GQLQA OGNLNLSSKG KVTNHAIGAKS  
nos-08 RISAEQQLNL NLDNLNNTK GLISSDLQTL IOGQDNNRRL IVNNOQGTII AGEESSTAG LNILAKGLTG DGKVLSSQGL NLQLNDYVQ DAQ-GQLQA OGNLNLSSKG KVTNHAIGAKS  
bau-09 RISAEQQLNL NLDNLNNTK GLISSDLQTL IOGQDNNRRL IVNNOQGTII AGEESSTAG LNILAKGLTG DGKVLSSQGL NLQLNDYVQ DAQ-GQLQA OGNLNLSSKG KVTNHAIGAKS  
bau-06 RISAEQQLNL NLDNLNNTK GLISSDLQTL IOGQDNNRRL IVNNOQGTII AGEESSTAG LNILAKGLTG DGKVLSSQGL NLQLNDYVQ DAQ-GQLQA OGNLNLSSKG KVTNHAIGAKS  
nos-012 RISAEQQLNL NLDNLNNTK GLISSDLQTL IOGQDNNRRL IVNNOQGTII AGEESSTAG LNILAKGLTG DGKVLSSQGL NLQLNDYVQ DAQ-GQLQA OGNLNLSSKG KVTNHAIGAKS  
bau-010 ATRSSONSOL NISQQLNNS GEISAVKQLG IOGQD-----L VMNINLQGLL AGEN----- LNILAKGLTG DGKVLSSQGL NLQLNDYVQ DAQ-GQLQA OGNLNLSSKG KVTNHAIGAKS  
bau-011 ATRSSONSOL NISQQLNNS GEISAVKQLG IOGQD-----L AINNLINGQLL AGEN----- LNILAKGLTG DGKVLSSQGL NLQLNDYVQ DAQ-GQLQA OGNLNLSSKG KVTNHAIGAKS  
bau-014 ATRSSONSOL NISQQLNNS GEISAVKQLG IOGQD-----L AINNLINGQLL AGEN----- LNILAKGLTG DGKVLSSQGL NLQLNDYVQ DAQ-GQLQA OGNLNLSSKG KVTNHAIGAKS  
bau-012 ATRSSONSOL NISQQLNNS GEISAVKQLG IOGQD-----L AINNLINGQLL AGEN----- LNILAKGLTG DGKVLSSQGL NLQLNDYVQ DAQ-GQLQA OGNLNLSSKG KVTNHAIGAKS  
bau-020 ATRSSONSOL NISQQLNNS GEISAVKQLG IOGQD-----L AINNLINGQLL AGEN----- LNILAKGLTG DGKVLSSQGL NLQLNDYVQ DAQ-GQLQA OGNLNLSSKG KVTNHAIGAKS  
bau-015 TRSSENOL NISQQLNNS GEISAVKQLG IOGQD-----L AMNINLQGLL AGEN----- LNILAKGLTG DGKVLSSQGL NLQLNDYVQ DAQ-GQLQA OGNLNLSSKG KVTNHAIGAKS  
bau-016 ATRSSONSOL NISQQLNNS GEISAVKQLG IOGQD-----L AMNINLQGLL AGEN----- LNILAKGLTG DGKVLSSQGL NLQLNDYVQ DAQ-GQLQA OGNLNLSSKG KVTNHAIGAKS  
bau-021 ATRSSONSOL NISQQLNNS GEISAVKQLG IOGQD-----L AMNINLQGLL AGEN----- LNILAKGLTG DGKVLSSQGL NLQLNDYVQ DAQ-GQLQA OGNLNLSSKG KVTNHAIGAKS  
bau-019 ATRSSONSOL NISQQLNNS GEISAVKQLG IOGQD-----L AMNINLQGLL AGEN----- LNILAKGLTG DGKVLSSQGL NLQLNDYVQ DAQ-GQLQA OGNLNLSSKG KVTNHAIGAKS  
bau-013 ATRSNQNAV NISQQLNNS GEISAVKQLG IOGQD-----L VINNOKGKLL SGEN----- LNIITAQSLTG DGQIASLQNA NITLKEFSKO TOE-GQLQA NNLSLSTAS DITNDGKINA  
cal-023 ATRSNQNAV NISQQLNNS GEISAVKQLG IOGQD-----L VINNOKGKLL SGEN----- LNIITAQSLTG DGQIASLQNA NITLKEFSKO TOE-GQLQA NNLSLSTAS DITNDGKINA  
pit-020 ATRSNQNAV NISQQLNNS GEISAVKQLG IOGQD-----L VINNOKGKLL SGEN----- LNIITAQSLTG DGQIASLQNA NITLKEFSKO TOE-GQLQA NNLSLSTAS DITNDGKINA  
pit-06 ATRSNQNAV NISQQLNNS GEISAVKQLG IOGQD-----L VINNOKGKLL SGEN----- LNIITAQSLTG DGQIASLQNA NITLKEFSKO TOE-GQLQA NNLSLSTAS DITNDGKINA  
bau-017 ATRSNQNAV NISQQLNNS GEISAVKQLG IOGQD-----L VINNOKGKLL SGEN----- LNIITAQSLTG DGQIASLQNA NITLKEFSKO TOE-GQLQA NNLSLSTAS DITNDGKINA  
nos-018 ATRANDRAVL NISQQLNNS VGSITSSGGL VVTSOGLLS AKQK-----L DLSQSLSS DGRILSLGDT TNLGSSYTG TADMSSQLA NGHLTINTG DITNDGKINA  
nos-022 ATRANDRAVL NISQQLNNS VGSITSSGGL VVTSOGLLS AKQK-----L DLSQSLSS EGRILSLGDT TNLGSSYTG TADMSSQLA NGHLTINTG DITNDGKINA  
bau-02 VIRASENATL NINMOLNNS G6ITSLNRLN IGTANKI-LA NLNNTGKLL AKQK-----L LMLKANELVN KGTISEGNV IDTLMQSYSH TOA-QDIAA NQDLKLSSTG DLINQSELSA  
bay-015 VIRSSADQNL NVQQLNNS G6ISSEKQLT L-VGDQ-L EINNINLQGLL AGTA-----L DLAQSLSS DGKLLSLGNA KLSLQNDYH SSG-AQLQA NQDLKLSSTG NIINNGTINA

3480

3481

baud-01 NGQLSISANT IEN---AVDG SLESQQTGLE SVGVLNLYGL INGSNTYVKA GQLNNI-AGR IYGDHIAIQA NTLNNO-SLK GLAPVIASRG DLDLGVQV LNLENNLHQ-----SGSQ  
nos-02 NGQLSISANT IEN---AVDG SLESQQTGLE SVGVLNLYGL INGSNTYVKA GQLNNI-AGR IYGDHIAIQA NTLNNO-SLK GLAPVIASRG DLDLGVQV LNLENNLHQ-----SGSQ  
bau-03 NGQLSISANT IEN---AVDG SLESQQTGLE SVGVLNLYGL INGSNTYVKA GQLNNI-AGR IYGDHIAIQA NTLNNO-SLK GLAPVIASRG DLDLGVQV LNLENNLHQ-----SGSQ  
nos-04 NGQLSISANT IEN---AVDG SLESQQTGLE SVGVLNLYGL INGSNTYVKA GQLNNI-AGR IYGDHIAIQA NTLNNO-SLK GLAPVIASRG DLDLGVQV LNLENNLHQ-----SGSQ  
bau-07 NGQLSISANT IEN---AVDG SLESQQTGLE SVGVLNLYGL INGSNTYVKA GQLNNI-AGR IYGDHIAIQA NTLNNO-SLK GLAPVIASRG DLDLGVQV LNLENNLHQ-----SGSQ  
nos-05 NGQLSISANT IEN---AVDG SLESQQTGLE SVGVLNLYGL INGSNTYVKA GQLNNI-AGR IYGDHIAIQA NTLNNO-SLK GLAPVIASRG DLDLGVQV LNLENNLHQ-----SGSQ  
nos-08 NGQLSISANT IEN---AVDG SLESQQTGLE SVGVLNLYGL INGSNTYVKA GQLNNI-AGR IYGDHIAIQA NTLNNO-SLK GLAPVIASRG DLDLGVQV LNLENNLHQ-----SGSQ  
bau-09 NGQLSISANT IEN---AVDG SLESQQTGLE SVGVLNLYGL INGSNTYVKA GQLNNI-AGR IYGDHIAIQA NTLNNO-SLK GLAPVIASRG DLDLGVQV LNLENNLHQ-----SGSQ  
bau-06 NGQLSISANT IEN---AVDG SLESQQTGLE SVGVLNLYGL INGSNTYVKA GQLNNI-AGR IYGDHIAIQA NTLNNO-SLK GLAPVIASRG DLDLGVQV LNLENNLHQ-----SGSQ  
nos-012 NGQLSISANT IEN---AVDG SLESQQTGLE SVGVLNLYGL INGSNTYVKA GQLNNI-AGR IYGDHIAIQA NTLNNO-SLK GLAPVIASRG DLDLGVQV LNLENNLHQ-----SGSQ  
bau-010 GNQLQLSAVN ISN---SNSA KIESHDTQLT AQQQINNTGL INGDLTTLTA DTVNNOGTR IYGTDLAIST NTLNLPDAN GTAPVIASRG DMNLGVNV LNANTODYD-----SQAL  
bau-011 GNQLQLSAVN ISN---SNSA KIESHDTQLT AQQQINNTGL INGDLTTLTA DTVNNOGTR IYGTDLAIST NTLNLPDAN GTAPVIASRG DMNLGVNV LNANTODYD-----SQAL  
bau-014 GNQLQLSAVN ISN---SNSA KIESHDTQLT AQQQINNTGL INGDLTTLTA DTVNNOGTR IYGTDLAIST NTLNLPDAN GTAPVIASRG DMNLGVNV LNANTODYD-----SQAL  
bau-012 GNQLQLSAVN ISN---SNSA KIESHDTQLT AQQQINNTGL INGDLTTLTA DTVNNOGTR IYGTDLAIST NTLNLPDAN GTAPVIASRG DMNLGVNV LNANTODYD-----SQAL  
bau-020 GNQLQLSAVN ISN---SNSA KIESHDTQLT AQQQINNTGL INGDLTTLTA DTVNNOGTR IYGTDLAIST NTLNLPDAN GTAPVIASRG DMNLGVNV LNANTODYD-----SQAL  
bau-015 GNQLQLSAVN ISN---SNSA KIESHDTQLT AQQQINNTGL INGDLTTLTA DTVNNOGTR IYGTDLAIST NTLNLPDAN GTAPVIASRG DMNLGVNV LNANTODYD-----SQAL  
bau-016 GNQLQLSAVN ISN---SNSA KIESHDTQLT AQQQINNTGL INGDLTTLTA DTVNNOGTR IYGTDLAIST NTLNLPDAN GTAPVIASRG DMNLGVNV LNANTODYD-----SQAL  
bau-021 GNQLQLSAVN ISN---SNSA KIESHDTQLT AQQQINNTGL INGDLTTLTA DTVNNOGTR IYGTDLAIST NTLNLPDAN GTAPVIASRG DMNLGVNV LNANTODYD-----SQAL  
bau-019 GNQLQLSAVN ISN---SNSA KIESHDTQLT AQQQINNTGL INGDLTTLTA DTVNNOGTR IYGTDLAIST NTLNLPDAN GTAPVIASRG DMNLGVNV LNANTODYD-----SQAL  
bau-013 GNILKLANAAN ITN---NSNA QIESHDTQIE AQQQINNTGL INGDLTTLTA DTVNNOGTR IYGTDLAIST NTLNLPDAN GTAPVIASRG DMNLGVNV LNANTODYD-----SQAL  
cal-023 GNILKLANAAN ITN---NSNA QIESHDTQIE AQQQINNTGL INGDYTTLKA NTVNNOGTR IYGTDLAIST NTLNLPDAN GTAPVIASRG DMNLGVNV LNANTODYD-----SQAL  
pit-020 GNILKLANAAN ITN---NSNA QIESHDTQIE AQQQINNTGL INGDYTTLKA NTVNNOGTR IYGTDLAIST NTLNLPDAN GTAPVIASRG DMNLGVNV LNANTODYD-----SQAL  
pit-06 GNILKLANAAN ITN---NSNA QIESHDTQIE AQQQINNTGL INGDYTTLKA NTVNNOGTR IYGTDLAIST NTLNLPDAN GTAPVIASRG DMNLGVNV LNANTODYD-----SQAL  
bau-017 GNILKLANAAN ITN---NSNA QIESHDTQIE AQQQINNTGL INGDYTTLKA NTVNNOGTR IYGTDLAIST NTLNLPDAN GTAPVIASRG DMNLGVNV LNANTODYD-----SQAL  
nos-018 GQTLNLNAAN INGLNNSA RLESYDTQLS AQQQINNTGL INGELTTLTA NTVNNTGTR IYGTSLAIGA NTLNLPDAN SVAPVIASRG DMNLGVQTL NMEPTDQNK GMOGTNNGAQ  
nos-022 GQTLNLNAAN INGLNNSA RLESYDTQLS AQQQINNTGL INGELTTLTA NTVNNTGTR IYGTSLAIGA NTLNLPDAN SVAPVIASRG DMNLGVQTL NMEPTDQNK GMOGTNNGAQ  
bau-02 GQVELNAKNI IQN---QTGA SISSNHTHLI AQQDTHNQGL INGELTHIQA NRWDNGA-R IYGTQVAIQS NTLNLPDAN GTAVIASRG DMNLGVQTL NQSGGVVKEN G-----RDNAW  
bay-015 GNQLALNAAN ITN---QOAG KIESHDTQLT AQQQINNTGL INGDFTRLQA ETLNNOGTR IYGTDLAIST NTLNLPDAN GTAPVIASRG DMNLGVQTL NLSNPT---D Y-----TSQAL

3600

3601

baud-01 IAMGDLRIG GSDSOWHQA GTAQVNNRS SVINANGNID LNADIVNNO VFFTTKQOQT TEQLDYNNYI ISDSRAGWYN PGPSQITQE IYSQNPDLFT KLPQAQVLT SY-----  
nos-02 IAMGDLRIG GSDSOWHQA GTAQVNNRS SVINANGNID LNADIVNNO VFFTTKQOQT TEQLDYNNYI ISDSRAGWYN PGPSQITQE IYSQNPDLFT KLPQAQVLT SY-----  
bau-03 IAMGDLRIG GSDSOWHQA GTAQVNNRS SVINANGNID LNADIVNNO VFFTTKQOQT TEQLDYNNYI ISDSRAGWYN PGPSQITQE IYSQNPDLFT KLPQAQVLT SY-----  
nos-04 IAMGDLRIG GSDSOWHQA GTAQVNNRS SVINANGNID LNADIVNNO VFFTTKQOQT TEQLDYNNYI ISDSRAGWYN PGPSQITQE IYSQNPDLFT KLPQAQVLT SY-----  
bau-07 IAMGDLRIG GSDSOWHQA GTAQVNNRS SVINANGNID LNADIVNNO VFFTTKQOQT TEQLDYNNYI ISDSRAGWYN PGPSQITQE IYSQNPDLFT KLPQAQVLT SY-----  
bau-05 IAMGDLRIG GSDSOWHQA GTAQVNNRS SVINANGNID LNADIVNNO VFFTTKQOQT TEQLDYNNYI ISDSRAGWYN PGPSQITQE IYSQNPDLFT KLPQAQVLT SY-----  
nos-08 IAMGDLRIG GSDSOWHQA GTAQVNNRS SVINANGNID LNADIVNNO VFFTTKQOQT TEQLDYNNYI ISDSRAGWYN PGPSQITQE IYSQNPDLFT KLPQAQVLT SY-----  
bau-09 IAMGDLRIG GSDSOWHQA GTAQVNNRS SVINANGNID LNADIVNNO VFFTTKQOQT TEQLDYNNYI ISDSRAGWYN PGPSQITQE IYSQNPDLFT KLPQAQVLT SY-----  
bau-06 IAMGDLRIG GSDSOWHQA GTAQVNNRS SVINANGNID LNADIVNNO VFFTTKQOQT TEQLDYNNYI ISDSRAGWYN PGPSQITQE IYSQNPDLFT KLPQAQVLT SY-----  
nos-012 IAMGDLRIG GSDSOWHQA GTAQVNNRS SVINANGNID LNADIVNNO VFFTTKQOQT TEQLDYNNYI ISDSRAGWYN PGPSQITQE IYSQNPDLFT KLPQAQVLT SY-----  
bau-010 IFSAGNLYLG GALDENRKA GTQTVINNES ATIESLGDNR LSQQTINNI KNFSTHE -----VYFSROEGL  
bau-011 IFSAGNLYLG GALDENRKA GTQTVINNES ATIESLGDNR LSQQTINNI KNFSTHE -----VYFSROEGL  
bau-014 IFSAGNLYLG GALDENRKA GTQTVINNES ATIESLGDNR LSQQTINNI KNFSTHE -----VYFSROEGL  
bau-012 IFSAGNLYLG GALDENRKA GTQTVINNES ATIESLGDNR LSQQTINNI KNFSTHE -----VYFSROEGL

3720





nos-D12 ---GANTTDH KAMSSAVDQ IQNTDTKAA5 VQGQTTQIDG SG---FIRT- NNANVQVNN ALYSKPNDSR ANVLVETDPA FSNYRNWLS DYMLNLGLD PALQOKRLGD GYFEORMVD  
bau-D10 ----NTTQV SVLEQLQGGT AEQVSEAST DQANAPDQAG TGEQLEIRTI NNSOFKVANN ALYRVGADSK AGYLIEITDPS FTNYNQLWSS DYMLDALGLD PALQOKRLGD GYFEORMVD  
bau-D11 ----NTTQV SVLDQLQGGT AEQVSEAST DQANAPDQAG TGEQLEIRTI NNSOFKVANN ALYRVGADSK AGYLIEITDPS FTNYNQLWSS DYMLDALGLD PALQOKRLGD GYFEORMVD  
bau-D14 ----NTTQV SVLEQLQGGT AEQVSEAST DQANAPDQAG TGEQLEIRTI NNSOFKVANN ALYRVGADSK AGYLIEITDPS FTNYNQLWSS DYMLDALGLD PALQOKRLGD GYFEORMVD  
bau-D12 ----NTAQV SVLDQLQGGT ASQVSVTIT DQTTAPDQAG AGEQFERTI NTNNVKVANN ALYRTVSDSK AGYLIVETDPS FTNYNQLWSS DYMLDALGLD PALQOKRLGD GYFEORMVD  
bau-D20 ----NTAQV SVLDQLQGGT ASQVSVTIT DQTTAPDQAG AGEQFERTI NTNNVKVANN ALYRTVSDSK AGYLIVETDPS FTNYNQLWSS DYMLDALGLD PALQOKRLGD GYFEORMVD  
bau-D15 ----NTTQV SVLEQLQGGT AEQVSEAST DQANAPDQAG TGEQLEIRTI NNSOFKVANN ALYRVGADSK AGYLIEITDPS FTNYNQLWSS DYMLDALGLD PALQOKRLGD GYFEORMVD  
bau-D16 ----NTTQV SVLEQLQGGT AEQVSEAST DQANAPDQAG TGEQLEIRTI NNSOFKVANN ALYRVGADSK AGYLIEITDPS FTNYNQLWSS DYMLDALGLD PALQOKRLGD GYFEORMVD  
bau-D21 ----NTTQV SVLEQLQGGT AEQVSEAST DQANAPDQAG TGEQLEIRTI NNSOFKVANN ALYRVGADSK AGYLIEITDPS FTNYNQLWSS DYMLDALGLD PALQOKRLGD GYFEORMVD  
bau-D19 ----NTTQV SVLEQLQGGT AEQVSEAST DQANAPDQAG TGEQLEIRTI NNSOFKVANN ALYRVGADSK AGYLIEITDPS FTNYNQLWSS DYMLDALGLD PALQOKRLGD GYFEORMVD  
bau-D13 ----NTTQI SVLDQLQGGK ASQVSGVSTS DQTTAPDQAG TGEQLEIRTI NNNNIKVANN ALYRTGADSK VGYIETDPP FTNYNQLWSS DYMLDALGLD PALQOKRLGD GYFEORMVD  
cal-D23 ----NTTQI SVLDQLQGGK ASQVSGVSTS DQTTAPDQAG TGEQLEIRTI NNNNIKVANN ALYRTGADSK VGYIETDPP FTNYNQLWSS DYMLDALGLD PALQOKRLGD GYFEORMVD  
pit-D20 ----NTTQI SVLDQLQGGK ASQVSGASTS GQATAPDQAG TGEQLEIRTI NNNNIKVANN ALYRTGADSK AGYLIEITDPP FTNYNQLWSS NYMLSALGLD PALQOKRLGD GYFEORMVD  
pit-D6 ----NTTQI SVLDQLQGGK ASQVSGVSTS DQTTAPDQAG TGEQLEIRTI NNNNIKVANN ALYRTGADSK AGYLIEITDPP FTNYNQLWSS DYMLDALGLD PALQOKRLGD GYFEORMVD  
bau-D17 ----NTTQI SVLDQLQGGK ASQVSGVSTS DQTTAPDQAG TGEQLEIRTI NNNNIKVANN ALYRTGADSK AGYLIEITDPP FTNYNQLWSS DYMLDALGLD PALQOKRLGD GYFEORMVD  
nos-D18 DGEVKNSTTV NQASMLTGEQ AQAQAANATN SSVATGTKAV TAPSYEIRTI NTDDGKISNS ALYRINPDSR SGYIETDPP FSQYRQLWSS DYMLDALGLD PALQOKRLGD GYFEORMVD  
nos-D22 DGEVKNSTTV NQASMLTGEQ AQAQAANATN SSVATGTKAV TAPSYEIRTI NTDDGKISNS ALYRINPDSR SGYIETDPP FSQYRQLWSS DYMLDALGLD PALQOKRLGD GYFEORMVD  
bau-D2 ----EAMPT TDIOAEQ-N IDRVEGEELN QVMNTASAVD SATDITVTRV SODFLNPSN ALFTTKQSDQ AQYLVETDPA YANVYRNWLS DYMLDALGLD PALQOKRLGD GYFEORMVD  
bay-D15 ----NAPQA SAVETVQ-QQ ----- SATSAPSSTP QGTSEIRSI DFSNFKVPS ALYKVNADSK AGYLIEITDPA FADYKWLSS DYMLDALGLD PALQOKRLGD GYFEORMVD

4201

4320

bau-D1 QVAQLTGYRF LOGYGSDEEQ YKALMNNGLS YAKOYNLRPG IALTPQEAQA LSSDIVLVE KETTLPDGTG TKALVPOVYV KARVGLDKGD GTLSADS10Q LNSKDLTNA GTIAGROVVO  
nos-D2 QVAQLTGYRF LOGYGSDEEQ YKALMNNGLS YAKOYNLRPG IALTPQEAQA LSSDIVLVE KETTLPDGTG TKALVPOVYV KARVGLDKGD GTLSADS10Q LNSKDLTNA GTIAGROVVO  
bau-D3 QVAQLTGYRF LOGYGSDEEQ YKALMNNGLS YAKOYNLRPG IALTPQEAQA LSSDIVLVE KETTLPDGTG TKALVPOVYV KARVGLDKGD GTLSADS10Q LNSKDLTNA GTIAGROVVO  
nos-D4 QVAQLTGYRF LOGYGSDEEQ YKALMNNGLS YAKOYNLRPG IALTPQEAQA LSSDIVLVE KETTLPDGTG TKALVPOVYV KARVGLDKGD GTLSADS10Q LNSKDLTNA GTIAGROVVO  
bau-D7 QVAQLTGYRF LOGYGSDEEQ YKALMNNGLS YAKOYNLRPG IALTPQEAQA LSSDIVLVE KETTLPDGTG TKALVPOVYV KARVGLDKGD GTLSADS10Q LNSKDLTNA GTIAGROVVO  
nos-D8 QVAQLTGYRF LOGYGSDEEQ YKALMNNGLS YAKOYNLRPG IALTPQEAQA LSSDIVLVE KETTLPDGTG TKALVPOVYV KARVGLDKGD GTLSADS10Q LNSKDLTNA GTIAGROVVO  
bau-D5 QVAQLTGYRF LOGYGSDEEQ YKALMNNGLS YAKOYNLRPG IALTPQEAQA LSSDIVLVE KETTLPDGTG TKALVPOVYV KARVGLDKGD GTLSADS10Q LNSKDLTNA GTIAGROVVO  
nos-D8 QVAQLTGYRF LOGYGSDEEQ YKALMNNGLS YAKOYNLRPG IALTPQEAQA LSSDIVLVE KETTLPDGTG TKALVPOVYV KARVGLDKGD GTLSADS10Q LNSKDLTNA GTIAGROVVO  
bau-D9 QVAQLTGYRF LOGYGSDEEQ YKALMNNGLS YAKOYNLRPG IALTPQEAQA LSSDIVLVE KETTLPDGTG TKALVPOVYV KARVGLDKGD GTLSADS10Q LNSKDLTNA GTIAGROVVO  
bau-D6 QVAQLTGYRF LOGYGSDEEQ YKALMNNGLS YAKOYNLRPG IALTPQEAQA LSSDIVLVE KETTLPDGTG TKALVPOVYV KARVGLDKGD GTLSADS10Q LNSKDLTNA GTIAGROVVO  
nos-D12 QVAQLTGYRF LOGYGSDEEQ YKALMNNGLS YAKOYNLRPG IALTPQEAQA LSSDIVLVE KETTLPDGTG TKALVPOVYV KARVGLDKGD GTLSADS10Q LNSKDLTNA GTIAGROVVO  
bau-D10 QIANLTGYRF LEGYGSDEEQ YKALMNNGLS YAKOYNLRPG IALTPQEAQA LSSDIVLVE KETTLPDGTG TKALVPOVYV KARVGLDKGD GTLSADS10Q LNSKDLTNA GTIAGROVVO  
nos-D11 QIANLTGYRF LEGYGSDEEQ YKALMNNGLS YAKOYNLRPG IALTPQEAQA LSSDIVLVE KETTLPDGTG TKALVPOVYV KARVGLDKGD GTLSADS10Q LNSKDLTNA GTIAGROVVO  
bau-D14 QIANLTGYRF LEGYGSDEEQ YKALMNNGLS YAKOYNLRPG IALTPQEAQA LSSDIVLVE KETTLPDGTG TKALVPOVYV KARVGLDKGD GTLSADS10Q LNSKDLTNA GTIAGROVVO  
nos-D12 QIANLTGYRF LEGYGSDEEQ YKALMNNGLS YAKOYNLRPG IALTPQEAQA LSSDIVLVE KETTLPDGTG TKALVPOVYV KARVGLDKGD GTLSADS10Q LNSKDLTNA GTIAGROVVO  
bau-D20 QIANLTGYRF LEGYGSDEEQ YKALMNNGLS YAKOYNLRPG IALTPQEAQA LSSDIVLVE KETTLPDGTG TKALVPOVYV KARVGLDKGD GTLSADS10Q LNSKDLTNA GTIAGROVVO  
nos-D15 QIANLTGYRF LEGYGSDEEQ YKALMNNGLS YAKOYNLRPG IALTPQEAQA LSSDIVLVE KETTLPDGTG TKALVPOVYV KARVGLDKGD GTLSADS10Q LNSKDLTNA GTIAGROVVO  
bau-D16 QIANLTGYRF LEGYGSDEEQ YKALMNNGLS YAKOYNLRPG IALTPQEAQA LSSDIVLVE KETTLPDGTG TKALVPOVYV KARVGLDKGD GTLSADS10Q LNSKDLTNA GTIAGROVVO  
nos-D19 QIANLTGYRF LEGYGSDEEQ YKALMNNGLS YAKOYNLRPG IALTPQEAQA LSSDIVLVE KETTLPDGTG TKALVPOVYV KARVGLDKGD GTLSADS10Q LNSKDLTNA GTIAGROVVO  
bau-D13 QIANLTGYRF LEGYGSDEEQ YKALMNNGLS YAKOYNLRPG IALTPQEAQA LSSDIVLVE KETTLPDGTG TKALVPOVYV KARVGLDKGD GTLSADS10Q LNSKDLTNA GTIAGROVVO  
cal-D23 QIANLTGYRF LEGYGSDEEQ YKALMNNGLS YAKOYNLRPG IALTPQEAQA LSSDIVLVE KETTLPDGTG TKALVPOVYV KARVGLDKGD GTLSADS10Q LNSKDLTNA GTIAGROVVO  
pit-D20 QIANLTGYRF LEGYGSDEEQ YKALMNNGLS YAKOYNLRPG IALTPQEAQA LSSDIVLVE KETTLPDGTG TKALVPOVYV KARVGLDKGD GTLSADS10Q LNSKDLTNA GTIAGROVVO  
pit-D6 QIANLTGYRF LEGYGSDEEQ YKALMNNGLS YAKOYNLRPG IALTPQEAQA LSSDIVLVE KETTLPDGTG TKALVPOVYV KARVGLDKGD GTLSADS10Q LNSKDLTNA GTIAGROVVO  
bau-D17 QIANLTGYRF LEGYGSDEEQ YKALMNNGLS YAKOYNLRPG IALTPQEAQA LSSDIVLVE KETTLPDGTG TKALVPOVYV KARVGLDKGD GTLSADS10Q LNSKDLTNA GTIAGROVVO  
nos-D18 QIAKLTGSRV LVYHSDDEEQ YKALLDAGVT FAQQYSLRPG VALTAAQMAE LSTDIVLVE KEVLTNGTIT TRALVPOVYV RAKAGDLLGD GSLTAAND10Q LKLGKVNLE ATIAGRAHALQ  
nos-D12 QIAKLTGSRV LVYHSDDEEQ YKALLDAGVT FAQQYSLRPG VALTAAQMAE LSTDIVLVE KEVLTNGTIT TRALVPOVYV RAKAGDLLGD GSLTAAND10Q LKLGKVNLE ATIAGRAHALQ  
bau-D2 QVAQLTGYRF LEGYGSDEEQ YKALMNNGLS YAKOYNLRPG IALTPQEAQA LSSDIVLVE KETTLPDGTG TKALVPOVYV KARVGLDKGD GTLSADS10Q LNSKDLTNA GTIAGROVVO  
bay-D15 QIANLTGYRF LEGFANDEEQ YKALMNNGLS YAKOYNLRPG IALTPQEAQA LSSDIVLVE KETTLPDGTG TKALVPOVYV KARVGLDKGD GTLSADS10Q LNSKDLTNA GTIAGROVVO

4321

4440

bau-D1 INSQNLNLA GNIRGGVSI STEKDLNNGI GMIOADQAMN LQVGNLNIQ STTQSSONA ----- LGQSNYSWTG IDRIAGLYYG S-----AQQQA LSDOPTLVMN VGGDRILAA  
nos-D2 INSQNLNLA GNIRGGVSI STEKDLNNGI GMIOADQAMN LQVGNLNIQ STTQSSONA ----- LGQSNYSWTG IDRIAGLYYG S-----AQQQA LSDOPTLVMN VGGDRILAA  
bau-D3 INSQNLNLA GNIRGGVSI STEKDLNNGI GMIOADQAMN LQVGNLNIQ STTQSSONA ----- LGQSNYSWTG IDRIAGLYYG S-----AQQQA LSDOPTLVMN VGGDRILAA  
nos-D4 INSQNLNLA GNIRGGVSI STEKDLNNGI GMIOADQAMN LQVGNLNIQ STTQSSONA ----- LGQSNYSWTG IDRIAGLYYG S-----AQQQA LSDOPTLVMN VGGDRILAA  
bau-D7 INSQNLNLA GNIRGGVSI STEKDLNNGI GMIOADQAMN LQVGNLNIQ STTQSSONA ----- LGQSNYSWTG IDRIAGLYYG S-----AQQQA LSDOPTLVMN VGGDRILAA  
nos-D5 INSQNLNLA GNIRGGVSI STEKDLNNGI GMIOADQAMN LQVGNLNIQ STTQSSONA ----- LGQSNYSWTG IDRIAGLYYG S-----AQQQA LSDOPTLVMN VGGDRILAA  
nos-D8 INSQNLNLA GNIRGGVSI STEKDLNNGI GMIOADQAMN LQVGNLNIQ STTQSSONA ----- LGQSNYSWTG IDRIAGLYYG S-----AQQQA LSDOPTLVMN VGGDRILAA  
bau-D9 INSQNLNLA GNIRGGVSI STEKDLNNGI GMIOADQAMN LQVGNLNIQ STTQSSONA ----- LGQSNYSWTG IDRIAGLYYG S-----AQQQA LSDOPTLVMN VGGDRILAA  
nos-D6 INSQNLNLA GNIRGGVSI STEKDLNNGI GMIOADQAMN LQVGNLNIQ STTQSSONA ----- LGQSNYSWTG IDRIAGLYYG S-----AQQQA LSDOPTLVMN VGGDRILAA  
nos-D12 INSQNLNLA GNIRGGVSI STEKDLNNGI GMIOADQAMN LQVGNLNIQ STTQSSONA ----- LGQSNYSWTG IDRIAGLYYG S-----AQQQA LSDOPTLVMN VGGDRILAA  
bau-D10 ITADNVNMLN GRIQGNVDI TSKDLNNGI GSIQAKDAMA MNGVGNLNV STTRTDTQ ----- VGFSASTTG LDRVAGLYYG D-----IQAGV DLNKATFVLN VAGNSVLKGA  
bau-D11 ITADNVNMLN GRIQGNVDI TSKDLNNGI GSIQAKDAMA MNGVGNLNV STTRTDTQ ----- VGFSASTTG LDRVAGLYYG D-----IQAGV DLNKATFVLN VAGNSVLKGA  
bau-D14 ITADNVNMLN GRIQGNVDI TSKDLNNGI GSIQAKDAMA MNGVGNLNV STTRTDTQ ----- VGFSASTTG LDRVAGLYYG D-----IQAGV DLNKATFVLN VAGNSVLKGA  
nos-D12 ITADNVNMLN GRIQGNVDI TSKDLNNGI GSIQAKDAMA MNGVGNLNV STTRTDTQ ----- VGFSASTTG LDRVAGLYYG D-----IQAGV DLNKATFVLN VAGNSVLKGA  
bau-D20 ITADNVNMLN GRIQGNVDI TSKDLNNGI GSIQAKDAMA MNGVGNLNV STTRTDTQ ----- VGFSASTTG LDRVAGLYYG D-----IQAGV DLNKATFVLN VAGNSVLKGA  
nos-D15 ITADNVNMLN GRIQGNVDI TSKDLNNGI GSIQAKDAMA MNGVGNLNV STTRTDTQ ----- VGFSASTTG LDRVAGLYYG D-----IQAGV DLNKATFVLN VAGNSVLKGA  
bau-D16 ITADNVNMLN GRIQGNVDI TSKDLNNGI GSIQAKDAMA MNGVGNLNV STTRTDTQ ----- VGFSASTTG LDRVAGLYYG D-----IQAGV DLNKATFVLN VAGNSVLKGA  
nos-D19 ITADNVNMLN GRIQGNVDI TSKDLNNGI GSIQAKDAMA MNGVGNLNV STTRTDTQ ----- VGFSASTTG LDRVAGLYYG D-----IQAGV DLNKATFVLN VAGNSVLKGA  
bau-D13 ITADNVNMLN GRIQGNVDI TSKDLNNGI GSIQAKDAMA MNGVGNLNV STTRTDTQ ----- VGFSASTTG LDRVAGLYYG D-----IQAGV DLNKATFVLN VAGNSVLKGA  
pit-D20 ITADNVNMLN GRIQGNVDI TSKDLNNGI GSIQAKDAMA MNGVGNLNV STTRTDTQ ----- VGFSASTTG LDRVAGLYYG D-----IQAGV DLNKATFVLN VAGNSVLKGA  
nos-D18 ITADNVNMLN GRIQGNVDI TSKDLNNGI GSIQAKDAMA MNGVGNLNV STTRTDTQ ----- VGFSASTTG LDRVAGLYYG D-----IQAGV DLNKATFVLN VAGNSVLKGA  
nos-D22 ISAEQDNDIG GRIEIGNVAL TTKDLNNGI GTLKAGSAMA LNVGNFNHV STS5ISGN PVFGQGMNG ISGNYTSQTS IDRIAGLYYG D-----GTGPI DPNNVSLMN VGGKSTLTA  
nos-D22 ISAEQDNDIG GRIEIGNVAL TTKDLNNGI GTLKAGSAMA LNVGNFNHV STS5ISGN PVFGQGMNG ISGNYTSQTS IDRIAGLYYG D-----GTGPI DPNNVSLMN VGGKSTLTA  
bau-D2 LNAENVLNLN GRIQGNVDI TSKDLNNGI GSIQAKDAMA MNGVGNLNV STTRTDTQ ----- VGFSASTTG LDRVAGLYYG D-----IQAGV DLNKATFVLN VAGNSVLKGA  
bay-D15 ITADNVNMLN GRIQGNVDI TSKDLNNGI GSIQAKDAMA MNGVGNLNV STTRTDTQ ----- VGFSASTTG LDRVAGLYYG D-----IQAGV DLNKATFVLN VAGNSVLKGA

4441

4560

bau-D1 NIQNNSGGRS IIRTGDLKV GSNLNTVNN VVGSKAYHL DTRQVEVSGO IKSQGDLSLQ GNNIQIHGSO ISSEGLTAL QAKERLOIEE GRNKLDQDDO SFSKKGKLS SSTSDFSHR  
nos-D2 NIQNNSGGRS IIRTGDLKV GSNLNTVNN VVGSKAYHL DTRQVEVSGO IKSQGDLSLQ GNNIQIHGSO ISSEGLTAL QAKERLOIEE GRNKLDQDDO SFSKKGKLS SSTSDFSHR  
bau-D3 NIQNNSGGRS IIRTGDLKV GSNLNTVNN VVGSKAYHL DTRQVEVSGO IKSQGDLSLQ GNNIQIHGSO ISSEGLTAL QAKERLOIEE GRNKLDQDDO SFSKKGKLS SSTSDFSHR  
nos-D4 NIQNNSGGRS IIRTGDLKV GSNLNTVNN VVGSKAYHL DTRQVEVSGO IKSQGDLSLQ GNNIQIHGSO ISSEGLTAL QAKERLOIEE GRNKLDQDDO SFSKKGKLS SSTSDFSHR  
bau-D7 NIQNNSGGRS IIRTGDLKV GSNLNTVNN VVGSKAYHL DTRQVEVSGO IKSQGDLSLQ GNNIQIHGSO ISSEGLTAL QAKERLOIEE GRNKLDQDDO SFSKKGKLS SSTSDFSHR  
nos-D5 NIQNNSGGRS IIRTGDLKV GSNLNTVNN VVGSKAYHL DTRQVEVSGO IKSQGDLSLQ GNNIQIHGSO ISSEGLTAL QAKERLOIEE GRNKLDQDDO SFSKKGKLS SSTSDFSHR  
nos-D8 NIQNNSGGRS IIRTGDLKV GSNLNTVNN VVGSKAYHL DTRQVEVSGO IKSQGDLSLQ GNNIQIHGSO ISSEGLTAL QAKERLOIEE GRNKLDQDDO SFSKKGKLS SSTSDFSHR  
bau-D9 NIQNNSGGRS IIRTGDLKV GSNLNTVNN VVGSKAYHL DTRQVEVSGO IKSQGDLSLQ GNNIQIHGSO ISSEGLTAL QAKERLOIEE GRNKLDQDDO SFSKKGKLS SSTSDFSHR  
nos-D12 NIQNNSGGRS IIRTGDLKV GSNLNTVNN VVGSKAYHL DTRQVEVSGO IKSQGDLSLQ GNNIQIHGSO ISSEGLTAL QAKERLOIEE GRNKLDQDDO SFSKKGKLS SSTSDFSHR  
bau-D10 E1-NNSNGAT LINTQGNVDI GTVQTYGKLG TVLDRNNSV SOKTQDVVSGO INSTGSLLN GONNIKIGSG LNS-QATTQL AAVQLNIEE GRQTSQDSD WYSKRGKLS SKTDTGSHD  
bau-D11 E1-NNSNGAT LINTQGNVDI GTVQTYGKLG TVLDRNNSV SOKTQDVVSGO INSTGSLLN GONNIKIGSG LNS-QATTQL AAVQLNIEE GRQTSQDSD WYSKRGKLS SKTDTGSHD  
nos-D14 E1-NNSNGAT LINTQGNVDI GTVQTYGKLG TVLDRNNSV SOKTQDVVSGO INSTGSLLN GONNIKIGSG LNS-QATTQL AAVQLNIEE GRQTSQDSD WYSKRGKLS SKTDTGSHD  
bau-D12 E1-NNSNGAS VINTQGNVDI GTVQTYGKLS TYRDIQNQTT SQAQADVSGO LNSNGSLLN GONNIKIGSG LNSVQGTQAI SAVNOLDIEE GRKTSQFDR WYKHKGTLS SKTDTGTFHD  
nos-D20 E1-NNSNGAS VINTQGNVDI GTVQTYGKLS TYRDIQNQTT SQAQADVSGO LNSNGSLLN GONNIKIGSG LNSVQGTQAI SAVNOLDIEE GRKTSQFDR WYKHKGTLS SKTDTGTFHD  
bau-D15 E1-NNSNGAT LINTQGNVDI GAVQIKGQEV LNLDAKNYK IAQQQDVGSO ISSAGTLAI GKNITGKAVO FSSQIGNVEL LAENDIQLE GLTOSTASSO FAYKSSFFG-K KKSSTYNAHE  
nos-D16 E1-NNSNGAT LINTQGNVDI GAVQIKGQEV LNLDAKNYK IAQQQDVGSO ISSAGTLAI GKNITGKAVO FSSQIGNVEL LAENDIQLE GLTOSTASSO FAYKSSFFG-K KKSSTYNAHE  
bau-D21 E1-NNSNGAT LINTQGNVDI GAVQIKGQEV LNLDAKNYK IAQQQDVGSO ISSAGTLAI GKNITGKAVO FSSQIGNVEL LAENDIQLE GLTOSTASSO FAYKSSFFG-K KKSSTYNAHE  
nos-D19 E1-NNSNGAT LINTQGNVDI GAVQIKGQEV LNLDAKNYK IAQQQDVGSO ISSAGTLAI GKNITGKAVO FSSQIGNVEL LAENDIQLE GLTOSTASSO FAYKSSFFG-K KKSSTYNAHE  
cal-D23 E1-NNSNGAS VINTQGNVDI GTVQTYGKLS TYRDIQNQTT SQAQADVSGO LNSNGSLLN GONNIKIGSG LNSVQGTQAI SAVNOLDIEE GRKTSQFDR WYKHKGTLS SKTDTGTFHD  
pit-D20 E1-NNSNGAS VINTQGNVDI GTVQTYGKLS TYRDIQNQTT SQAQADVSGO LNSNGSLLN GONNIKIGSG LNSVQGTQAI SAVNOLDIEE GRKTSQFDR WYKHKGTLS SKTDTGTFHD  
pit-D6 E1-NNSNGAS VINTQGNVDI GTVQTYGKLS TYRDIQNQTT SQAQADVSGO LNSNGSLLN GONNIKIGSG LNSVQGTQAI SAVNOLDIEE GRKTSQFDR WYKHKGTLS SKTDTGTFHD  
nos-D17 E1-NNSNGAS VINTQGNVDI GTVQTYGKLS TYRDIQNQTT SQAQADVSGO LNSNGSLLN GONNIKIGSG LNSVQGTQAI SAVNOLDIEE GRKTSQFDR WYKHKGTLS SKTDTGTFHD  
nos-D18 K1-ENRNGAS L1QIQGNVEL GTIKVGOQHD NVGSVSGRYYS S6SSQIEGSS ITSVGNVTIT GNNIHGTAVK LGSQGDVAAL LAEHLNLTGD GRSLE----- EHYTTGN KKNSSHDAN  
nos-D22 K1-ENRNGAS L1QIQGNVEL GTIKVGOQHD NVGSVSGRYYS S6SSQIEGSS ITSVGNVTIT GNNIHGTAVK LGSQGDVAAL LAEHLNLTGD GRSLE----- EHYTTGN KKNSSHDAN  
bau-D2 Q1-QNANGST QILTQGNLNI GAIQTIQISNK GYANEKNYNY S1TQIDGSS IOQGTANLS ANKIQGKAVD IASQGDIVL NAQOQISLEN GKNLHSTDSA MSAQSSGMLG RNTERNEVHK  
bay-D15 Q1-NNSNSAT VLNTTQGNVDI GTVSVGQKET LKIDDKNGYQ LKQQDVGSO IKSAGSLLN GONNIKIGSG LNSVQGTQAI SAQKQIVLND GLNQSTVSS--OSQSKSGFG GKSSTYDAS

4561

4680

bau-D1 S5D1AVGSIV EGKVVLLDAG N1NVRGSNIV SDELTOIQAK DNANIEGAQN QYNSQTSNV KNSGLMSTGG IGFSLGGKQE TTLKTEQ0LT NSA-----SQVG SLNGNTNIVA GKTYQ0TGST  
nos-D2 S5D1AVGSIV EGKVVLLDAG N1NVRGSNIV SDELTOIQAK DNANIEGAQN QYNSQTSNV KNSGLMSTGG IGFSLGGKQE TTLKTEQ0LT NSA-----SQVG SLNGNTNIVA GKTYQ0TGST  
bau-D3 S5D1AVGSIV EGKVVLLDAG N1NVRGSNIV SDELTOIQAK DNANIEGAQN QYNSQTSNV KNSGLMSTGG IGFSLGGKQE TTLKTEQ0LT NSA-----SQVG SLNGNTNIVA GKTYQ0TGST  
nos-D4 S5D1AVGSIV EGKVVLLDAG N1NVRGSNIV SDELTOIQAK DNANIEGAQN QYNSQTSNV KNSGLMSTGG IGFSLGGKQE TTLKTEQ0LT NSV-----SQVG SLNGNTNIVA GKTYQ0TGST



baud-7 SSDIavgSIV EGKVVLLDAG NINVRGSNV SDELTOIQAK DNANI EGAQN QYNSQNSV KNSGVMSTGG IGFSLGKKQE TTLKTEQOQL NSA---SQVG SLNGNTNIVA GKTYQQTGST  
baud-5 SSDIavgSIV EGKVVLLDAG NINVRGSNV SDELTOIQAK DNANI EGAQN QYNSQNSV KNSGVMSTGG IGFSLGKKQE TTLKTEQOQL NSA---SQVG SLNGNTNIVA GKTYQQTGST  
nos-08 SSDIavgSIV EGKVVLLDAG NINVRGSNV SDELTOIQAK DNANI EGAQN QYNSQNSV KNSGVMSTGG IGFSLGKKQE TTLKTEQOQL NSA---SQVG SLNGNTNIVA GKTYQQTGST  
baud-09 SSDIavgSIV EGKVVLLDAG NINVRGSNV SDELTOIQAK DNANI EGAQN QYNSQNSV KNSGVMSTGG IGFSLGKKQE TTLKTEQOQL NSA---SQVG SLNGNTNIVA GKTYQQTGST  
baud-06 SSDIavgSIV EGKVVLLDAG NINVRGSNV SDELTOIQAK DNANI EGAQN QYNSQNSV KNSGVMSTGG IGFSLGKKQE TTLKTEQOQL NSA---SQVG SLNGNTNIVA GKTYQQTGST  
nos-012 SSDIavgSIV EGKVVLLDAG NINVRGSNV SDELTOIQAK DNANI EGAQN QYNSQNSV KNSGVMSTGG IGFSLGKKQE TTLKTEQOQL NSA---SQVG SLNGNTNIVA GKTYQQTGST  
baud-10 QANEASTI GKKVLLDAN NINVRGSQVV SDDLTOIQAK ENISITTAEN QYNSQNFQTV KKSQFASLS DGVASVGYGK SSLNTEKDGK STTLTQSVIR SKTGDITII- AGKDLTTEAA  
baud-11 QANEASTI GKKVLLDAN NINVRGSQVV SDDLTOIQAK ENISITTAEN QYNSQNFQTV KKSQFASLS DGVASVGYGK SSLNTEKDGK STTLTQSVIR SKTGDITII- AGKDLTTEAA  
baud-14 QANEASTI GKKVLLDAN NINVRGSQVV SDDLTOIQAK ENISITTAEN QYNSQNFQTV KKSQFASLS DGVASVGYGK SSLNTEKDGK STTLTQSVIR SKTGDITII- AGKDLTTEAA  
baud-12 QANEASTI GKKVLLDAN NINVRGSQVV SDDLTOIQAK ENISITTAEN QYNSQNFQTV KKSQFASLS DGVASVGYGK SSLNTEKDGK STTLTQSVIR SKTGDITII- AGKDLTTEAA  
baud-20 QANEASTI GKKVLLDAN NINVRGSQVV SDDLTOIQAK ENISITTAEN QYNSQNFQTV KKSQFASLS DGVASVGYGK SSLNTEKDGK STTLTQSVIR SKTGDITII- AGKDLTTEAA  
baud-15 TVSQANQIN- AGQNVILNSQ QGNITAIIDLK AT-----AG NNIQIQAEQG NV---QLLSAL NEKSESSTSS KKAATYNNR QSYIDQOVA QTLL----- -KAGNTVDVN AAKNIELQAN  
baud-16 TVSQANQIN- AGQNVILNSQ QGNITAIIDLK AT-----AG NNIQIQAEQG NV---QLLSAL NEKSESSTSS KKAATYNNR QSYIDQOVA QTLL----- -KAGNTVDVN AAKNIELQAN  
baud-21 TVSQANQIN- AGQNVILNSQ QGNITAIIDLK AT-----AG NNIQIQAEQG NV---QLLSAL NEKSESSTSS KKAATYNNR QSYIDQOVA QTLL----- -KAGNTVDVN AAKNIELQAN  
baud-19 TVSQANQIN- AGQNVILNSQ QGNITAIIDLK AT-----AG NNIQIQAEQG NV---QLLSAL NEKSESSTSS KKAATYNNR QSYIDQOVA QTLL----- -KAGNTVDVN AAKNIELQAN  
baud-13 QANEASTI GKKVLLDAN NINVRGSQVV SDDLTOIQAK ENINIVAAEN HYSNQEQTV KKSQFASLS DGVASVGYGK SSLNTEKDGK STTLTQSVIR SKAGDITII- AGKDLTTEAA  
cal-23 QANEASTI GKKVLLDAN NINVRGSQVV SDDLTOIQAK ENINIVAAEN HYSNQEQTV KKSQFASLS DGVASVGYGK SSLNTEKDGK STTLTQSVIR SKAGDITII- AGKDLTTEAA  
pit-20 QNEASTI GKKVLLDAN NINVRGSQVV SDDLTOIQAK ENINIVAAEN HYSNQEQTV KKSQFASLS DGVASVGYGK SSLNTEKDGK STTLTQSVIR SKAGDITII- AGKDLTTEAA  
pit-06 QNEASTI GKKVLLDAN NINVRGSQVV SDDLTOIQAK ENINIVAAEN HYSNQEQTV KKSQFASLS DGVASVGYGK SSLNTEKDGK STTLTQSVIR SKAGDITII- AGKDLTTEAA  
baud-17 TVSQANQIN- AGQNVILNSQ QGNITAIIDLK AT-----AG NNIQIQAEQG NV---QLLSAL NEKSESSTSS KKAATYNNR QSYIDQOVA QTLL----- -KAGNTVDVN AAKNIELQAN  
nos-018 TVSQANQIN- AGQNVILNSQ QGNITAIIDLK AT-----AG NNIQIQAEQG NV---QLLSAL NEKSESSTSS KKAATYNNR QSYIDQOVA QTLL----- -KAGNTVDVN AAKNIELQAN  
nos-012 TVSQANQIN- AGQNVILNSQ QGNITAIIDLK AT-----AG NNIQIQAEQG NV---QLLSAL NEKSESSTSS KKAATYNNR QSYIDQOVA QTLL----- -KAGNTVDVN AAKNIELQAN  
baud-02 SDQSIANLW AGQNVILNSQ QGNITAIIDLK AT-----AG NNIQIQAEQG NV---QLLSAL NEKSESSTSS KKAATYNNR QSYIDQOVA QTLL----- -KAGNTVDVN AAKNIELQAN  
bay-015 SDQSIANLW AGQNVILNSQ QGNITAIIDLK AT-----AG NNIQIQAEQG NV---QLLSAL NEKSESSTSS KKAATYNNR QSYIDQOVA QTLL----- -KAGNTVDVN AAKNIELQAN

4681

baud-01 VSSQKGDVNI LAEQVNI EAA KEQSTSDYKH EMQKGLTLA VNPVVSAVQ SVAESAKQV QSKNDRVN-A MAANAAGFDA YKAGQALS QGALSNAAGL N---GGVEVGV SLTYGEQKNT  
nos-02 VSSQKGDVNI LAEQVNI EAA KEQSTSDYKH EMQKGLTLA VNPVVSAVQ SVAESAKQV QSKNDRVN-A MAANAAGFDA YKAGQALS QGALSNAAGL N---GGVEVGV SLTYGEQKNT  
baud-03 VSSQKGDVNI LAEQVNI EAA KEQSTSDYKH EMQKGLTLA VNPVVSAVQ SVAESAKQV QSKNDRVN-A MAANAAGFDA YKAGQALS QGALSNAAGL N---GGVEVGV SLTYGEQKNT  
nos-04 VSSQKGDVNI LAEQVNI EAA KEQSTSDYKH EMQKGLTLA VNPVVSAVQ SVAESAKQV QSKNDRVN-A MAANAAGFDA YKAGQALS QGALSNAAGL N---GGVEVGV SLTYGEQKNT  
baud-07 VSSQKGDVNI LAEQVNI EAA KEQSTSDYKH EMQKGLTLA VNPVVSAVQ SVAESAKQV QSKNDRVN-A MAANAAGFDA YKAGQALS QGALSNAAGL N---GGVEVGV SLTYGEQKNT  
baud-05 VSSQKGDVNI LAEQVNI EAA KEQSTSDYKH EMQKGLTLA VNPVVSAVQ SVAESAKQV QSKNDRVN-A MAANAAGFDA YKAGQALS QGALSNAAGL N---GGVEVGV SLTYGEQKNT  
nos-08 VSSQKGDVNI LAEQVNI EAA KEQSTSDYKH EMQKGLTLA VNPVVSAVQ SVAESAKQV QSKNDRVN-A MAANAAGFDA YKAGQALS QGALSNAAGL N---GGVEVGV SLTYGEQKNT  
baud-09 VSSQKGDVNI LAEQVNI EAA KEQSTSDYKH EMQKGLTLA VNPVVSAVQ SVAESAKQV QSKNDRVN-A MAANAAGFDA YKAGQALS QGALSNAAGL N---GGVEVGV SLTYGEQKNT  
nos-06 VSSQKGDVNI LAEQVNI EAA KEQSTSDYKH EMQKGLTLA VNPVVSAVQ SVAESAKQV QSKNDRVN-A MAANAAGFDA YKAGQALS QGALSNAAGL N---GGVEVGV SLTYGEQKNT  
baud-12 VSSQKGDVNI LAEQVNI EAA KEQSTSDYKH EMQKGLTLA VNPVVSAVQ SVAESAKQV QSKNDRVN-A MAANAAGFDA YKAGQALS QGALSNAAGL N---GGVEVGV SLTYGEQKNT  
baud-11 ILDAGKDLN KGANVNLNAG YTTDEQHSV HSKQGISVGV VTPSPAMAAA AAYKNSMNNQ QFSDSVAQVQ MAQGEARAKA SMAAMTLVTI QAQSKTNEV SMTSSTQAVI TOATKAGNIN  
baud-10 ILDAGKDLN KGANVNLNAG YTTDEQHSV HSKQGISVGV VTPSPAMAAA AAYKNSMNNQ QFSDSVAQVQ MAQGEARAKA SMAAMTLVTI QAQSKTNEV SMTSSTQAVI TOATKAGNIN  
baud-14 ILDAGKDLN KGANVNLNAG YTTDEQHSV HSKQGISVGV VTPSPAMAAA AAYKNSMNNQ QFSDSVAQVQ MAQGEARAKA SMAAMTLVTI QAQSKTNEV SMTSSTQAVI TOATKAGNIN  
baud-12 ILDAGKDLN KGANVNLNAG YTTDEQHSV HSKQGISVGV VTPSPAMAAA AAYKNSMNNQ QFSDSVAQVQ MAQGEARAKA SMAAMTLVTI QAQSKTNEV SMTSSTQAVI TOATKAGNIN  
baud-20 ILDAGKDLN KGANVNLNAG YTTDEQHSV HSKQGISVGV VTPSPAMAAA AAYKNSMNNQ QFSDSVAQVQ MAQGEARAKA SMAAMTLVTI QAQSKTNEV SMTSSTQAVI TOATKAGNIN  
baud-15 DVQAGQSIYV GNTMORQAD GTLKAADGSL MPENVTLSTL ETHDQWDEQ QKGYRGIAGE LVKGLAVG--- MSGLEALAPG LKLDKKTIVG ESNRQTEQI ROTGSLNAA NIAVSSGQOT  
baud-16 DVQAGQSIYV GNTMORQAD GTLKAADGSL MPENVTLSTL ETHDQWDEQ QKGYRGIAGE LVKGLAVG--- MSGLEALAPG LKLDKKTIVG ESNRQTEQI ROTGSLNAA NIAVSSGQOT  
baud-21 DVQAGQSIYV GNTMORQAD GTLKAADGSL MPENVTLSTL ETHDQWDEQ QKGYRGIAGE LVKGLAVG--- MSGLEALAPG LKLDKKTIVG ESNRQTEQI ROTGSLNAA NIAVSSGQOT  
baud-19 DVQAGQSIYV GNTMORQAD GTLKAADGSL MPENVTLSTL ETHDQWDEQ QKGYRGIAGE LVKGLAVG--- MSGLEALAPG LKLDKKTIVG ESNRQTEQI ROTGSLNAA NIAVSSGQOT  
baud-13 ILDAGKDLN KGANVNLNAG YTTDEQHSV HSKQGISVGV VTPSPAMAAA AAYKNSMNNQ QFSDSVAQVQ MAQGEARAKA SMAAMTLVTI QAQSKTNEV SMTSSTQAVI TOATKAGNIN  
cal-23 ILDAGKDLN KGANVNLNAG YTTDEQHSV HSKQGISVGV VTPSPAMAAA AAYKNSMNNQ QFSDSVAQVQ MAQGEARAKA SMAAMTLVTI QAQSKTNEV SMTSSTQAVI TOATKAGNIN  
pit-06 ILDAGKDLN KGANVNLNAG YTTDEQHSV HSKQGISVGV VTPSPAMAAA AAYKNSMNNQ QFSDSVAQVQ MAQGEARAKA SMAAMTLVTI QAQSKTNEV SMTSSTQAVI TOATKAGNIN  
baud-17 DVQAGQSIYV GNTMORQAD GTLKAADGSL MPENVTLSTL ETHDQWDEQ QKGYRGIAGE LVKGLAVG--- MSGLEALAPG LKLDKKTIVG ESNRQTEQI ROTGSLNAA NIAVSSGQOT  
nos-018 DADAGKSIYV GNTLMORQAD GTLKAADGSL MPKNVLLSTL ETHDQWDEQ QKGYRGIAGE LVKGLAVG--- MSGLEALAPG LKLDKKTIVG ESNRQTEQI ROTGSLNAA NIAVSSGQOT  
nos-022 DADAGKSIYV GNTLMORQAD GTLKAADGSL MPKNVLLSTL ETHDQWDEQ QKGYRGIAGE LVKGLAVG--- MSGLEALAPG LKLDKKTIVG ESNRQTEQI ROTGSLNAA NIAVSSGQOT  
baud-02 DVQAGQSIYV GNTLMORQAD GTLKAADGSL MPENVTLSTL ETHDQWDEQ QKGYRGIAGE LVKGLAVG--- MSGLEALAPG LKLDKKTIVG ESNRQTEQI ROTGSLNAA NIAVSSGQOT  
bay-015 DVQAGQSIYV GNTLMORQAD GTLKAADGSL MPENVTLSTL ETHDQWDEQ QKGYRGIAGE LVKGLAVG--- MSGLEALAPG LKLDKKTIVG ESNRQTEQI ROTGSLNAA NIAVSSGQOT

4800

4801

baud-01 ETSHSQSTTA S0S0VNAAGT TTIATGAGD QSNINIVGSD VLG00GTRLA ADNPNVNIKAA ---EONHIE ESKNESAGWN AGVTVS---N KTGFVGTAG NLGKGGKNGT -DTSYVNSHV  
nos-02 ETSHSQSTTA S0S0VNAAGT TTIATGAGD QSNINIVGSD VLG00GTRLA ADNPNVNIKAA ---EONHIE ESKNESAGWN AGVTVS---N KTGFVGTAG NLGKGGKNGT -DTSYVNSHV  
baud-03 ETSHSQSTTA S0S0VNAAGT TTIATGAGD QSNINIVGSD VLG00GTRLA ADNPNVNIKAA ---EONHIE ESKNESAGWN AGVTVS---N KTGFVGTAG NLGKGGKNGT -DTSYVNSHV  
nos-04 ETSHSQSTTA S0S0VNAAGT TTIATGAGD QSNINIVGSD VLG00GTRLA ADNPNVNIKAA ---EONHIE ESKNESAGWN AGVTVS---N KTGFVGTAG NLGKGGKNGT -DTSYVNSHV  
baud-07 ETSHSQSTTA S0S0VNAAGT TTIATGAGD QSNINIVGSD VLG00GTRLA ADNPNVNIKAA ---EONHIE ESKNESAGWN AGVTVS---N KTGFVGTAG NLGKGGKNGT -DTSYVNSHV  
baud-05 ETSHSQSTTA S0S0VNAAGT TTIATGAGD QSNINIVGSD VLG00GTRLA ADNPNVNIKAA ---EONHIE ESKNESAGWN AGVTVS---N KTGFVGTAG NLGKGGKNGT -DTSYVNSHV  
nos-08 ETSHSQSTTA S0S0VNAAGT TTIATGAGD QSNINIVGSD VLG00GTRLA ADNPNVNIKAA ---EONHIE ESKNESAGWN AGVTVS---N KTGFVGTAG NLGKGGKNGT -DTSYVNSHV  
baud-09 ETSHSQSTTA S0S0VNAAGT TTIATGAGD QSNINIVGSD VLG00GTRLA ADNPNVNIKAA ---EONHIE ESKNESAGWN AGVTVS---N KTGFVGTAG NLGKGGKNGT -DTSYVNSHV  
baud-06 ETSHSQSTTA S0S0VNAAGT TTIATGAGD QSNINIVGSD VLG00GTRLA ADNPNVNIKAA ---EONHIE ESKNESAGWN AGVTVS---N KTGFVGTAG NLGKGGKNGT -DTSYVNSHV  
nos-012 ETSHSQSTTA S0S0VNAAGT TTIATGAGD QSNINIVGSD VLG00GTRLA ADNPNVNIKAA ---EONHIE ESKNESAGWN AGVTVS---N KTGFVGTAG NLGKGGKNGT -DTSYVNSHV  
baud-10 IATGEGSINS QGALS SAEGD ALLHAKENIN LNVAQSHSEQ TVDRKQSGFS IDNRDWAAPA GTFKNNKQGD GRNTQTTGTQ LSVGGKTLQ TGGQDINNVG SSVASKGDVN L-HAARDINI  
baud-11 IATGEGSINS QGALS SAEGD ALLHAKENIN LNVAQSHSEQ TVDRKQSGFS IDNRDWAAPA GTFKNNKQGD GRNTQTTGTQ LSVGGKTLQ TGGQDINNVG SSVASKGDVN L-HAARDINI  
baud-14 IATGEGSINS QGALS SAEGD ALLHAKENIN LNVAQSHSEQ TVDRKQSGFS IDNRDWAAPA GTFKNNKQGD GRNTQTTGTQ LSVGGKTLQ TGGQDINNVG SSVASKGDVN L-HAARDINI  
baud-12 IATGEGSINS QGALS SAEGD ALLHAKENIN LNVAQSHSEQ TVDRKQSGFS IDNRDWAAPA GTFKNNKQGD GRNTQTTGTQ LSVGGKTLQ TGGQDINNVG SSVASKGDVN L-HAARDINI  
baud-20 IATGEGSINS QGALS SAEGD ALLHAKENIN LNVAQSHSEQ TVDRKQSGFS IDNRDWAAPA GTFKNNKQGD GRNTQTTGTQ LSVGGKTLQ TGGQDINNVG SSVASKGDVN L-HAARDINI  
baud-15 TL-TSADTLA KNVALSGOK- VTLNAAEQON IE-SSSHSTE TIEGL---GVK L-NKDSIRLG GFVSEKDKNT LTVTETTHKA G5INTDNL5I NGKGVDTLQ QNIKATGDTL IDHGRGDLNI  
baud-21 TL-TSADTLA KNVALSGOK- VTLNAAEQON IE-SSSHSTE TIEGL---GVK L-NKDSIRLG GFVSEKDKNT LTVTETTHKA G5INTDNL5I NGKGVDTLQ QNIKATGDTL IDHGRGDLNI  
baud-19 TL-TSADTLA KNVALSGOK- VTLNAAEQON IE-SSSHSTE TIEGL---GVK L-NKDSIRLG GFVSEKDKNT LTVTETTHKA G5INTDNL5I NGKGVDTLQ QNIKATGDTL IDHGRGDLNI  
baud-13 IATGEGSINS QGALS SAEGD ALLHAKENIN LNVAQSHSEQ TVDRKQSGFS IDNRDWAAPA GTFKNNKQGD GRNTQTTGTQ LSVGGKTLQ TGGQDINNVG SSVASKGDVN L-HAARDINI  
cal-23 IATGEGSINS QGALS SAEGD ALLHAKENIN LNVAQSHSEQ TVDRKQSGFS IDNRDWAAPA GTFKNNKQGD GRNTQTTGTQ LSVGGKTLQ TGGQDINNVG SSVASKGDVN L-HAARDINI  
pit-06 IATGEGSINS QGALS SAEGD ALLHAKENIN LNVAQSHSEQ TVDRKQSGFS IDNRDWAAPA GTFKNNKQGD GRNTQTTGTQ LSVGGKTLQ TGGQDINNVG SSVASKGDVN L-HAARDINI  
baud-17 TL-TSADTLA KNVALSGOK- VTLNAAEQON I---ESSHS TIEGL---GVK L-NKDSIRLG GFVSEKDKNT LTVTETTHKA G5INTDNL5I NGKGVDTLQ QNIKATGDTL IDHGRGDLNI  
nos-018 TL-TSADTLA KNVALSGOK- VTLNAAEQON IE-SSSHSTE TIEGL---GVK L-NKDSIRLG GFVSEKDKNT LTVTETTHKA G5INTDNL5I NGKGVDTLQ QNIKATGDTL IDHGRGDLNI  
nos-022 TL-TSADTLA KNVALSGOK- VTLNAAEQON IE-SSSHSTE TIEGL---GVK L-NKDSIRLG GFVSEKDKNT LTVTETTHKA G5INTDNL5I NGKGVDTLQ QNIKATGDTL IDHGRGDLNI  
baud-02 TL-TSSDITA KNTLILGOK- VTLNAAEQON IS-ATSHSKE TIEGL---GVK L-NKDSIRLG GFVSEKDKNT LTVTETTHKA G5INTDNL5I NGKGVDTLQ QNIKATGDTL IDHGRGDLNI  
bay-015 TL-TSDITA KNTLILGOK- VTLNAAEQON IT-VESTSKE TVQGL---GAK L-NKDSIRLG GFVLEDAQS SKTTETTHKL G5INTENLKI QVGEVDILG QNITATGDTL IDHGRGDLNI

4920

4921

baud-01 GSKDLSLTTI SGKTNN--- ---IIGQVQ GKGVI EADN LNVELQDKA TYKSKQNMMS AQVSVGFSGG NVSGSFSKSN VDANYASVNE  
nos-02 GSKDLSLTTI SGKTNN--- ---IIGQVQ GKGVI EADN LNVELQDKA TYKSKQNMMS AQVSVGFSGG NVSGSFSKSN VDANYASVNE  
baud-03 GSKDLSLTTI SGKTNN--- ---IIGQVQ GKGVI EADN LNVELQDKA TYKSKQNMMS AQVSVGFSGG NVSGSFSKSN VDANYASVNE  
nos-04 GSKDLSLTTI SGKTNN--- ---IIGQVQ GKGVI EADN LNVELQDKA TYKSKQNMMS AQVSVGFSGG NVSGSFSKSN VDANYASVNE  
baud-07 GSKDLSLTTI SGKTNN--- ---IIGQVQ GKGVI EADN LNVELQDKA TYKSKQNMMS AQVSVGFSGG NVSGSFSKSN VDANYASVNE  
baud-05 GSKDLSLTTI SGKTNN--- ---IIGQVQ GKGVI EADN LNVELQDKA TYKSKQNMMS AQVSVGFSGG NVSGSFSKSN VDANYASVNE  
nos-08 GSKDLSLTTI SGKTNN--- ---IIGQVQ GKGVI EADN LNVELQDKA TYKSKQNMMS AQVSVGFSGG NVSGSFSKSN VDANYASVNE  
baud-09 GSKDLSLTTI SGNATN--- ---IIGQVQ GKGVI EADN LNVELQDKA TYKSKQNMMS AQVSVGFSGG NVSGSFSKSN VDANYASVNE  
baud-06 GSKDLSLTTI SGNATN--- ---IIGQVQ GKGVI EADN LNVELQDKA TYKSKQNMMS AQVSVGFSGG NVSGSFSKSN VDANYASVNE  
nos-012 GSKDLSLTTI SGKTNN--- ---IIGQVQ GKGVI EADN LNVELQDKA TYKSKQNMMS AQVSVGFSGG NVSGSFSKSN VDANYASVNE  
baud-10 KSSONS0S0S EQSSNKGIGS AQISDTEQFY GYMSGKSQST SNSVEQQRSS VGSLEGNVNI QAQRQYTOQV ADVIAAKDLN IKAQDQVLE GHNTGSSSEN SKDLKVGQFS RVSSPILDLV  
baud-11 KSSONS0S0S EQSSNKGIGS AQISDTEQFY GYMSGKSQST SNSVEQQRSS VGSLEGNVNI QAQRQYTOQV ADVIAAKDLN IKAQDQVLE GHNTGSSSEN SKDLKVGQFS RVSSPILDLV  
baud-14 KSSONS0S0S EQSSNKGIGS AQISDTEQFY GYMSGKSQST SNSVEQQRSS VGSLEGNVNI QAQRQYTOQV ADVIAAKDLN IKAQDQVLE GHNTGSSSEN SKDLKVGQFS RVSSPILDLV  
baud-12 KSSONS0S0S EQSSNKGIGS AQISDTEQFY GYMSGKSQST SNSVEQQRSS VGSLEGNVNI QAQRQYTOQV ADVIAAKDLN IKAQDQVLE GHNTGSSSEN SKDLKVGQFS RVSSPILDLV  
baud-20 KSSONS0S0S EQSSNKGIGS AQISDTEQFY GYMSGKSQST SNSVEQQRSS VGSLEGNVNI QAQRQYTOQV ADVIAAKDLN IKAQDQVLE GHNTGSSSEN SKDLKVGQFS RVSSPILDLV  
baud-15 GGYENKTITE EKTKNE--- ---KTSVEV GRYNVALDAA LAVGAVKDA SALKDAK--- ---DAYSQA QRDYAAAGL KEA---LDDSK  
baud-16 GGYENKTITE EKTKNE--- ---KTSVEV GRYNVALDAA LAVGAVKDA SALKDAK--- ---DAYSQA QRDYAAAGL KEA---LDDSK  
baud-21 GGYENKTITE EKTKNE--- ---KTSVEV GRYNVALDAA LAVGAVKDA SALKDAK--- ---DAYSQA QRDYAAAGL KEA---LDDSK  
baud-19 GGYENKTITE EKTKNE--- ---KTSVEV GRYNVALDAA LAVGAVKDA SALKDAK--- ---DAYSQA QRDYAAAGL KEA---LDDSK  
baud-13 KSSONS0S0S EQSSNKGIGS AQISDTEQFY GYMSGKSQST SNSVEQQRSS VGSLEGNVNI QAQRQYTOQV ADVIAAKDLN IKAQDQVLE GHNTGSSSEN SKDLKVGQFS RVSSPILDLV  
cal-23 KSSONS0S0S EQSSNKGIGS AQISDTEQFY GYMNQSQSN SHGIEQQRSS VGSLEGNVNI QAQRQYTOQV ADVIAAKDLN IKAQDQVLE GHNTGSSSEN SKDLKVGQFS RVSSPILDLV  
pit-06 KSSONS0S0S EQSSNKGIGS AQISDTEQFY GYMNQSQSN SHGIEQQRSS VGSLEGNVNI QAQRQYTOQV ADVIAAKDLN IKAQDQVLE GHNTGSSSEN SKDLKVGQFS RVSSPILDLV  
pit-06 KSSONS0S0S EQSSNKGIGS AQISDTEQFY GYMNQSQSN SHGIEQQRSS VGSLEGNVNI QAQRQYTOQV ADVIAAKDLN IKAQDQVLE GHNTGSSSEN SKDLKVGQFS RVSSPILDLV  
baud-17 GGYENKTITE EKTKNE--- ---KTSVEV GRYNVALDAA LAVGAVKDA SALKDAK--- ---DAYSQA QRDYAAAGL KEA---LDDSK  
nos-018 GGYENKTITE EKTKNE--- ---KTSVEV GRYNVALDAA LAVGAVKDA SALKDAK--- ---DAYSQA QRDYAAAGL KEA---LDDSK  
nos-022 GGYENKTITE EKTKNE--- ---KTSVEV GRYNVALDAA LAVGAVKDA SALKDAK--- ---DAYSQA QRDYAAAGL KEA---LDDSK  
baud-02 GGYENKTITE DKTHTV--- ---TISTEV GRYNVALDAA LAVGAVKDA EVVKQAK--- ---DQYSQA QRDYASGKIT KEA---LDDTK  
bay-015 GGYENKTITE DKTHTV--- ---TISTEV GRYNVALDAA LAVGAVKDA EAVKQAK--- ---DQYSQA QRDYASGKIT KEA---LDDSK

5040



5041
bau-D1 QSGVFGDDG YQIKVKNKTD LKGAIIITSTQ TAENLKKNSL DTGTLTSSNI QNVTEYDAGK ISVGGGFNAG KSGTAGNKEP GTVLSTPNKI DOHASTTVGV SKSVGFGLDS DKDSSVTKSG
nos-02 QSGVFGDDG YQIKVKNKTD LKGAIIITSTQ TAENLKKNSL DTGTLTSSNI QNVTEYDAGK ISVGGGFNAG KSGTAGNKEP GTVLSTPNKI DOHASTTVGV SKSVGFGLDS DKDSSVTKSG
bau-03 QSGVFGDDG YQIKVKNKTD LKGAIIITSTQ TAENLKKNSL DTGTLTSSNI QNVTEYDAGK ISVGGGFNAG KSGTAGNKEP GTVLSTPNKI DOHASTTVGV SKSVGFGLDS DKDSSVTKSG
nos-04 QSGVFTGEDG YQIKVKNKTD LKGAIIITSTQ TAENLKKNSL DTGTLTSSNI QNVTEYDAGK ISVGGGFNAG KSGTAGNKEP GTVLSTPNKI DOHASTTVGV SKSVGFGLDS DKDSSVTKSG
bau-05 QSGVFGDDG YQIKVKNKTD LKGAIIITSTQ TAENLKKNSL DTGTLTSSNI QNVTEYDAGK ISVGGGFNAG KSGTAGNKEP GTVLSTPNKI DOHASTTVGV SKSVGFGLDS DKDSSVTKSG
bau-07 QSGVFGDDG YQIKVKNKTD LKGAIIITSTQ TAENLKKNSL DTGTLTSSNI QNVTEYDAGK ISVGGGFNAG KSGTAGNKEP GTVLSTPNKI DOHASTTVGV SKSVGFGLDS DKDSSVTKSG
nos-08 QSGVFGDDG YQIKVKNKTD LKGAIIITSTQ TAENLKKNSL DTGTLTSSNI QNVTEYDAGK ISVGGGFNAG KSGTAGNKEP GTVLSTPNKI DOHASTTVGV SKSVGFGLDS DKDSSVTKSG
bau-09 QAGIYAGDDG YQIKVKNKTD LKGAIIITSTQ TAENLKKNSL DTGTLTSSNI QNVTEYDAGK ISVGGGFNAG KSGTAGNKEP GTVLSTPNKI DOHASTTVGV SKSVGFGLDS DKDSSVTKSG
bau-10 QAGIYAGDDG YQIKVKNKTD LKGAIIITSTQ TAENLKKNSL DTGTLTSSNI QNVTEYDAGK ISVGGGFNAG KSGTAGNKEP GTVLSTPNKI DOHASTTVGV SKSVGFGLDS DKDSSVTKSG
nos-112 QTVGFAGDDG YQIKVKNKTD LKGAIIITSTQ TAENLKKNSL DTGTLTSSNI QNVTEYDAGK ISVGGGFNAG KSGTAGNKEP GTVLSTPNKI DOHASTTVGV SKSVGFGLDS DKDSSVTKSG
bau-110 NAADKATKSQ ADDRTOALQA VAAGAOGYQT YSDIKGGALF KAESGIGFST SKNQNSSYA TSQNNLKAG GNVNLTSTHG DIHLQNTQV KAEDKINLDS AKNIVLESQO SQNKADGKNS
bau-111 NAADKATKSQ ADDRTOALQA VAAGAOGYQT YSDIKGGALF KAESGIGFST SKNQNSSYA TSQNNLKAG GNVNLTSTHG DIHLQNTQV KAEDKINLDS AKNIVLESQO SQNKADGKNS
bau-114 NAADKATKSQ ADDRTOALQA VAAGAOGYQT YSDIKGGALF KAESGIGFST SKNQNSSYA TSQNNLKAG GNVNLTSTHG DIHLQNTQV KAEDKINLDS AKNIVLESQO SQNKADGKNS
bau-112 NAADKATKSQ ADDRTOALQA VAAGAOGYQT YSDIKGGALF KAESGIGFST SKNQNSSYA TSQNNLKAG GNVNLTSTHG DIHLQNTQV KAEDKINLDS AKNIVLESQO SQNKADGKNS
bau-120 NAADKATKSQ ADDRTOALQA VAAGAOGYQT YSDIKGGALF KAESGIGFST SKNQNSSYA TSQNNLKAG GNVNLTSTHG DIHLQNTQV KAEDKINLDS AKNIVLESQO SQNKADGNS
bau-D15 ANVAMATANL ASAOIIVAGAS AAAAAASSAT YGFTIIGANGE RIET-----TT NNNOTOGHW-----QGSNLELN -NLTLSKSEGO NTNIQO-SRL TATGTTTFNG TKDLNVTAGT EHSQESSK
bau-016 ANVAMATANL ASAOIIVAGAS AAAAAASSAT YGFTIIGANGE RIET-----TT NNNOTOGHW-----QGSNLELN -NLTLSKSEGO NTNIQO-SRL TATGTTTFNG TKDLNVTAGT EHSQESSK
bau-021 ANVAMATANL ASAOIIVAGAS AAAAAASSAT YGFTIIGANGE RIET-----TT NNNOTOGHW-----QGSNLELN -NLTLSKSEGO NTNIQO-SRL TATGTTTFNG TKDLNVTAGT EHSQESSK
bau-019 ANVAMATANL ASAOIIVAGAS AAAAAASSAT YGFTIIGANGE RIET-----TT NNNOTOGHW-----QGSNLELN -NLTLSKSEGO NTNIQO-SRL TATGTTTFNG TKDLNVTAGT EHSQESSK
bau-113 NAADKATKSQ ADDRTOALQA VAAGAOGYQT YSDIKGGALF KAESGIGFST SKNQNSSYA TSQNNLKAG GNVNLTSTHG DIHLQNTQV KAEDKINLDS AKNIVLESQO SQNKADGKNS
ca l-223 NAADKAKNSK ADDRTOALQA VAAGAOGYQT YSDIKGGALF KAESGIGFST SKNQNSSYA TSQNNLKAG GNVNLTSTHG DIHLQNTQV KAEDKINLDS AKNIVLESQO SQNKADGKNS
pit-20 NAADKAKNSK ADDRTOALQA VAAGAOGYQT YSDIKGGALF KAESGIGFST SKNQNSSYA TSQNNLKAG GNVNLTSTHG DIHLQNTQV KAEDKINLDS AKNIVLESQO SQNKADGKNS
pit-06 NAADKAKNSK ADDRTOALQA VAAGAOGYQT YSDIKGGALF KAESGIGFST SKNQNSSYA TSQNNLKAG GNVNLTSTHG DIHLQNTQV KAEDKINLDS AKNIVLESQO SQNKADGKNS
bau-017 ANVAMATANL ASAOIIVAGAS AAAAAASSAT YGFTIIGANGE RIET-----TT NNNOTOGHW-----QGSNLELN -NLTLSKSEGO NTNIQO-SRL TATGTTTFNG TKDLNVTAGT EHSQESSK
nos-018 ANVAMATANL ASAOIIVAGAS AAAAAASSAT YGFTIIGANGE RIET-----TT NNNOTOGHW-----QGSNLELN -NLTLSKSEGO NTNIQO-SRL TATGTTTFNG TKDLNVTAGT EHSQESSK
nos-022 ANVAMATANL ASAOIIVAGAS AAAAAASSAT YGFTIIGANGE RIET-----TT NNNOTOGHW-----QGSNLELN -NLTLSKSEGO NTNIQO-SRL TATGTTTFNG TKDLNVTAGT EHSQESSK
bau-02 ANVAMATANL ANAQIIVAGSA AAAAAASSAT YGFTIIGANGE RIET-----TT NNNOTOGHW-----QGSNLELN -NLTLSKSEGO NTNIQO-SRL TATGTTTFNG TKDLNVTAGT EHSQESSK
bay-015 ANVAMATANL ANAQIIVAGSA AAAAAASSAT YGFTIIGANGE RIET-----TT NNNOTOGHW-----QGSNLELN -NLTLSKSEGO NTNIQO-SRL TATGTTTFNG TKDLNVTAGT EHSQESSK

5161
bau-D1 INTONITIRD EQGQALTKG TAGQIKSEIL TSVTTDARE NSGALONNFD KDVQSEINL QMDVTKNFD NRQEAGITVD NIVKALEVTG QAI-EGAKOT LAIAKAQOQE IQKLSPEDO-
nos-02 VNTONITIRE EQGQALTKG TAGQIKSEIL TSVTTDARE NSGALONNFD KDVQSEINL QMDVTKNFD NRQEAGITVD NIVKALEVTG QAI-EGAKOT LAIAKAQOQE IQKLSPEDO-
bau-03 INTONITIRD EQGQALTKG TAGQIKSEIL TSVTTDARE NSGALONNFD KDVQSEINL QMDVTKNFD NRQEAGITVD NIVKALEVTG QAI-EGAKOT LAIAKAQOQE IQKLSPEDO-
nos-04 VNTONITIRD EQGQALTKG TAGQIKSEIL TSVTTDARE NSGALONNFD KDVQSEINL QMDVTKNFD NRQEAGITVD NIVKALEVTG QAI-EGAKOT LAIAKAQOQE IQKLSPEDO-
bau-07 INTONITIRD EQGQALTKG TAGQIKSEIL TSVTTDARE NSGALONNFD KDVQSEINL QMDVTKNFD NRQEAGITVD NIVKALEVTG QAI-EGAKOT LAIAKAQOQE IQKLSPEDO-
nos-05 INTONITIRD EQGQALTKG TAGQIKSEIL TSVTTDARE NSGALONNFD KDVQSEINL QMDVTKNFD NRQEAGITVD NIVKALEVTG QAI-EGAKOT LAIAKAQOQE IQKLSPEDO-
nos-08 VNTONITIRD EQGQALTKG TAGQIKSEIL TSVTTDARE NSGALONNFD KDVQSEINL QMDVTKNFD NRQEAGITVD NIVKALEVTG QAI-EGAKOT LAIAKAQOQE IQKLSPEDO-
bau-09 INTONITIRD EQGQALTKG TAGQIKSEIL TSVTTDARE NSGALONNFD KDVQSEINL QMDVTKNFD NRQEAGITVD NIVKALEVTG QAI-EGAKOT LAIAKAQOQE IQKLSPEDO-
bau-10 INTONITIRD EQGQALTKG TAGQIKSEIL TSVTTDARE NSGALONNFD KDVQSEINL QMDVTKNFD NRQEAGITVD NIVKALEVTG QAI-EGAKOT LAIAKAQOQE IQKLSPEDO-
nos-012 INTONITIRD EQGQALTKG TAGQIKSEIL TSVTTDARE NSGALONNFD KDVQSEINL QMDVTKNFD NRQEAGITVD NIVKALEVTG QAI-EGAKOT LAIAKAQOQE IQKLSPEDO-
bau-110 NAGL SVGVGA SVGAOTGYVI YGEAGFGKGS NHDLSNTHNQ TLDKAKNISL TSKGDTTLRG AQAKADRIDA N-VGGQLKVE SLODTEVQNT KOTGAGGRLO ASFGTAWAS GNFSSSKASG
bau-111 NAGL SVGVGA SVGAOTGYVI YGEAGFGKGS NHDLSNTHNQ TLDKAKNISL TSKGDTTLRG AQAKADRIDA N-VGGQLKVE SLODTEVQNT KOTGAGGRLO ASFGTAWAS GNFSSSKASG
bau-114 NAGL SVGVGA SVGAOTGYVI YGEAGFGKGS NHDLSNTHNQ TLDKAKNISL TSKGDTTLRG AQAKADRIDA N-VGGQLKVE SLODTEVQNT KOTGAGGRLO ASFGTAWAS GNFSSSKASG
bau-112 NAGL SVGVGA SVGAOTGYVI YGEAGFGKGS NHDLSNTHNQ TLDKAKNISL TSKGDTTLRG AQAKADRIDA N-VGGQLKVE SLODTEVQNT KOTGAGGRLO ASFGTAWAS GNFSSSKASG
bau-120 NAGL SVGVGA SVGAOTGYVI YGEAGFGKGS NHDLSNTHNQ TLDKAKNISL TSKGDTTLRG AQAKADRIDA N-VGGQLKVE SLODTEVQNT KOTGAGGRLO ASFGTAWAS GNFSSSKASG
bau-015 TNSQSVSYSS GGGGSASIGK QTSOSQESL THVNSVALN RTEGOLNKLN IOGGEVSI-----ADRGNL Q-VN-QIHEV SLODTEVQNT KOTGAGGRLO ASFGTAWAS GNFSSSKASG
bau-016 TNSQSVSYSS GGGGSASIGK QTSOSQESL THVNSVALN RTEGOLNKLN IOGGEVSI-----ADRGNL Q-VN-QIHEV SLODTEVQNT KOTGAGGRLO ASFGTAWAS GNFSSSKASG
bau-021 TNSQSVSYSS GGGGSASIGK QTSOSQESL THVNSVALN RTEGOLNKLN IOGGEVSI-----ADRGNL Q-VN-QIHEV SLODTEVQNT KOTGAGGRLO ASFGTAWAS GNFSSSKASG
bau-019 TNSQSVSYSS GGGGSASIGK QTSOSQESL THVNSVALN RTEGOLNKLN IOGGEVSI-----ADRGNL Q-VN-QIHEV SLODTEVQNT KOTGAGGRLO ASFGTAWAS GNFSSSKASG
bau-113 NAGL SVGVGA SVGAOTGYVI YGEAGFGKGS NHDLSNTHNQ TLDKAKNISL TSKGDTTLRG AQAKADRIDA N-VGGQLKVE SLODTEVQNT KOTGAGGRLO ASFGTAWAS GNFSSSKASG
ca l-223 NAGL SVGVGA SVGAOTGYVI YGEAGFGKGS NHDLSNTHNQ TLDKAKNISL TSKGDTTLRG AQAKADRIDA N-VGGQLKVE SLODTEVQNT KOTGAGGRLO ASFGTAWAS GNFSSSKASG
pit-06 NAGL SVGVGA SVGAOTGYVI YGEAGFGKGS NHDLSNTHNQ TLDKAKNISL TSKGDTTLRG AQAKADRIDA N-VGGQLKVE SLODTEVQNT KOTGAGGRLO ASFGTAWAS GNFSSSKASG
bau-017 TNSQSVSYSS GGGGSASIGK QTSOSQESL THVNSVALN RTEGOLNKLN IOGGEVSI-----ADRGNL Q-VN-QIHEV SLODTEVQNT KOTGAGGRLO ASFGTAWAS GNFSSSKASG
nos-018 TNSQSVSYSS GGGGSASIGK QTSOSQESL THVNSVALN RTEGOLNKLN IOGGEVSI-----ADRGNL Q-VN-QIHEV SLODTEVQNT KOTGAGGRLO ASFGTAWAS GNFSSSKASG
nos-022 TNSQSVSYSS GGGGSASIGK QTSOSQESL THVNSVALN RTEGOLNKLN IOGGEVSI-----ADRGNL Q-VN-QIHEV SLODTEVQNT KOTGAGGRLO ASFGTAWAS GNFSSSKASG
bau-02 TNSQSVSYSS GGGGSASIGK QTSOSQESL THVNSVALN RTEGOLNKLN IOGGEVSI-----ADRGNL Q-VN-QIHEV SLODTEVQNT KOTGAGGRLO ASFGTAWAS GNFSSSKASG
bay-015 TNSQSVSYSS GGGGSASIGK QTSOSQESL THVNSVALN RTEGOLNKLN IOGGEVSI-----ADRGNL Q-VN-QIHEV SLODTEVQNT KOTGAGGRLO ASFGTAWAS GNFSSSKASG

5281
bau-01 -----WIFEN FLTELALQST TDRDITY-----YPLVLA GLAEMLAASA SARPCASALE TVNVLGAVG AILNEQSDDK NKKTPPKPL STSGNSATV PPNKDNDR FKYDNKQIGK
nos-02 WDEGGYRVA MHTALAGST GLEGAIV-----TTGTIVA SAPKINDFON SVAQ-ALTO GMSEKAAEAV ASGVTSLTLA AAGVAVGLNT ASGTATVND GNSKLLTEG
bau-03 WDEGGYRVA MHTALAGST GLEGAIV-----TTGTIVA SAPKINDFON SVAQ-ALTO GMSEKAAEAV ASGVTSLTLA AAGVAVGLNT ASGTATVND GNSKLLTEG
nos-04 YORLGVLLDS ISTGLSAPTS SGLGIAT-----ATLSPA SYQIGQYFKE QASNNANGQL TSGQEAHIL AHTVLGAAVA AAGNDAMTA GLSAGGAEA APILSSFL-Y GKADKLTAD
bau-07 YORLGVLLDS ISTGLSAPTS SGLGIAT-----ATLSPA SYQIGQYFKE QASNNANGQL TSGQEAHIL AHTVLGAAVA AAGNDALTA GLSAGGAEA APILSSFL-Y GKADKLTAD
nos-05 YORLGVLLDS ISTGLSAPTS SGLGIAT-----ATLSPA SYQIGQYFKE QASNNANGQL TSGQEAHIL AHTVLGAAVA AAGNDALTA GLSAGGAEA APILSSFL-Y GKADKLTAD
nos-08 YORLGVLLDS ISTGLSAPTS SGLGIAT-----ATLSPA SYQIGQYFKE QASNNANGQL TSGQEAHIL AHTVLGAAVA AAGNDALTA GLSAGGAEA APILSSFL-Y GKADKLTAD
bau-09 YORLGVLLDS ISTGLSAPTS SGLGIAT-----ATLSPA SYQIGQYFKE QASNNANGQL TSGQEAHIL AHTVLGAAVA AAGNDALTA GLSAGGAEA APILSSFL-Y GKADKLTAD
bau-06 YORLGVLLDS ISTGLSAPTS SGLGIAT-----ATLSPA SYQIGQYFKE QASNNANGQL TSGQEAHIL AHTVLGAAVA AAGNDALTA GLSAGGAEA APILSSFL-Y GKADKLTAD
nos-012 YORLGVLLDS ISTGLSAPTS SGLGIAT-----ATLSPA SYQIGQYFKE QASNNANGQL TSGQEAHIL AHTVLGAAVA AAGNDALTA GLSAGGAEA APILSSFL-Y GKADKLTAD
bau-110 DNSVNVQSSG LFAFGGGYHV KADSVDLKG-----GAVSTA TKDNLDLTTN RL-FSNIEV QSYDATTVS LSGGTSLGKG K-7GDSKAS TPTNNDWRN ATFSFPLPQ HDSDKDSST
bau-111 DNSVNVQSSG LFAFGGGYHV KADSVDLKG-----GAVSTA TKDNLDLTTN RL-FSNIEV QSYDATTVS LSGGTSLGKG K-7GDSKAS TPTNNDWRN ATFSFPLPQ HDSDKDSST
bau-114 DNSVNVQSSG LFAFGGGYHV KADSVDLKG-----GAVSTA TKDNLDLTTN RL-FSNIEV QSYDATTVS LSGGTSLGKG K-7GDSKAS TPTNNDWRN ATFSFPLPQ HDSDKDSST
bau-112 DNSVNVQSSG LFAFGGGYHV KADSVDLKG-----GAVSTA TKDNLDLTTN RL-FSNIEV QSYDATTVS LSGGTSLGKG K-7GDSKAS TPTNNDWRN ATFSFPLPQ HDSDKDSST
bau-120 DNSVNVQSSG LFAFGGGYHV KADSVDLKG-----GAVSTA TKDNLDLTTN RL-FSNIEV QSYDATTVS LSGGTSLGKG K-7GDSKAS TPTNNDWRN ATFSFPLPQ HDSDKDSST
bau-015 DSAMVNTSK LLIIGDKDHA NLDAMGVQK-----VTNIGGV IANATKNADG TLDYKGLNY SGAELEKLDQ DHNVNSRGRF NVSTTIGKTT QEKDGKSKY PNGSTTLGLQ SNGQTEQL
bau-016 DSAMVNTSK LLIIGDKDHA NLDAMGVQK-----VTNIGGV IANATKNADG TLDYKGLNY SGAELEKLDQ DHNVNSRGRF NVSTTIGKTT QEKDGKSKY PNGSTTLGLQ SNGQTEQL
bau-021 DSAMVNTSK LLIIGDKDHA NLDAMGVQK-----VTNIGGV IANATKNADG TLDYKGLNY SGAELEKLDQ DHNVNSRGRF NVSTTIGKTT QEKDGKSKY PNGSTTLGLQ SNGQTEQL
bau-019 DSAMVNTSK LLIIGDKDHA NLDAMGVQK-----VTNIGGV IANATKNADG TLDYKGLNY SGAELEKLDQ DHNVNSRGRF NVSTTIGKTT QEKDGKSKY PNGSTTLGLQ SNGQTEQL
bau-113 DNSVNVQSSG LFAFGGGYHV KADSVDLKG-----GAVSTA TKDNLDLTTN RL-FSNIEV QSYDATTVS LSGGTSLGKG K-7GDSKAS TPTNNDWRN ATFSFPLPQ HDSDKDSST
ca l-223 DNSVNVQSSG LFAFGGGYHV KADSVDLKG-----GAVSTA TKDNLDLTTN RL-FSNIEV QSYDATTVS LSGGTSLGKG K-7GDSKAS TPTNNDWRN ATFSFPLPQ HDSDKDSST
pit-06 DNSVNVQSSG LFAFGGGYHV KADSVDLKG-----GAVSTA TKDNLDLTTN RL-FSNIEV QSYDATTVS LSGGTSLGKG K-7GDSKAS TPTNNDWRN ATFSFPLPQ HDSDKDSST
pit-20 DNSVNVQSSG LFAFGGGYHV KADSVDLKG-----GAVSTA TKDNLDLTTN RL-FSNIEV QSYDATTVS LSGGTSLGKG K-7GDSKAS TPTNNDWRN ATFSFPLPQ HDSDKDSST
bau-017 DSAMVNTSK LLIIGDKDHA NLDAMGVQK-----VTNIGGV IANATKNADG TLDYKGLNY SGAELEKLDQ DHNVNSRGRF NVSTTIGKTT QEKDGKSKY PNGSTTLGLQ SNGQTEQL
nos-018 DSAMVNTSK LLIIGDKDHA NLDAMGVQK-----VTNIGGV IANATKNADG TLDYKGLNY SGAELEKLDQ DHNVNSRGRF NVSTTIGKTT QEKDGKSKY PNGSTTLGLQ SNGQTEQL
nos-022 DSAMVNTSK LLIIGDKDHA NLDAMGVQK-----VTNIGGV IANATKNADG TLDYKGLNY SGAELEKLDQ DHNVNSRGRF NVSTTIGKTT QEKDGKSKY PNGSTTLGLQ SNGQTEQL
bau-02 DKAMVNTSK LLIIGDKDHA NLDAMGVQK-----VTNIGGV IANATKNADG TLDYKGLNY SGAELEKLDQ DHNVNSRGRF NVSTTIGKTT QEKDGKSKY PNGSTTLGLQ SNGQTEQL
bay-015 DSAMVNTSK LLIIGDKDHA NLDAMGVQK-----VTNIGGV IANATKNADG TLDYKGLNY SGAELEKLDQ DHNVNSRGRF NVSTTIGKTT QEKDGKSKY PNGSTTLGLQ SNGQTEQL

5401
bau-01 KLGKHVSDFG RNPANATDRE YVLAQIENIA RHPDKVVRGT FAGQGPMTNR GAVQFRIKQO DVVVTKPDGT FVT-----ILRNGIN-----NPSVKQAL NGAK
nos-02 KTEAEQTRLR AAACALVECS KGVPESDANY KSLKAFKFEALG KTYTKEQNAL KATGLF-----TYSNWDKAND IRT-----NHDEAVTR-----VGGAGKVI TGGVTAIDG AAGALGCT-----
bau-03 KTEAEQTRLR AAACALVECS KGVPESDANY KSLKAFKFEALG KTYTKEQNAL KATGLF-----TYSNWDKAND IRT-----NHDEAVTR-----VGGAGKVI TGGVTAIDG AAGALGCT-----
nos-04 OKSTISSIVG LAGSVAVGTT GDIGSVTQSSG QVAONAVEIN YLTVKIQIAY K-----TQMLCK VKQ-----NCDQVI-----DKFRKL-A IQKDEQLVAV CTSPTNCKQ
bau-07 OKSTISSIVG LAGSVAVGTT GDIGSVTQSSG QVAONAVEIN FLSVKEARK NALYK-----SKHEELSNE KKE-----LAE INRKDKAR-----DEFITKVC QLVNVSASQ QSAQAAMST
nos-08 OKSTISSIVG LAGSVAVGTT GDIGSVTQSSG QVAONAVEIN FLSVKEARK NALYK-----SKHEELSNE KKE-----LAE INRKDKAR-----DEFITKVC QLVNVSASQ QSAQAAMST
bau-09 OKSTISSIVG LAGSVAVGTT GDIGSVTQSSG QVAONAVEIN FLSVKEARK NALYK-----SKHEELSNE KKE-----LAE INRKDKAR-----DEFITKVC QLVNVSASQ QSAQAAMST
nos-06 OKSTISSIVG LAGSVAVGTT GDIGSVTQSSG QVAONAVEIN YLTYKELACT EQAKTKLANC NRTNKCSPDE IRQAEITVKL LDKDQIIT-----DVKLLETC RT-NPOSSA QOQKLDQAT
nos-012 OKSTISSIVG LAGSVAVGTT GDIGSVTQSSG QVAONAVEIN EFSIVTDASN QOAGKSIYA KMRAECPANG INP-----N SAACQGYO-----DAKLREA SGTGLNLSDG ATIVGLQP
bau-011 YATLSAGNIK VGGKSTVVEQ LGHISDASTA NRVAVETLPLN QTILDKQKTV ADATSTIAAA TRTYSONQOQ QAEKAKNAEK QNVNLQGLD SDALKYYEEL DSAKOEYLR QYS-----PDY
bau-110 YATLSAGNIK VGGKSTVVEQ LGHISDASTA NRVAVETLPLN QTILDKQKTV ADATSTIAAA TRTYSONQOQ QAEKAKNAEK QNVNLQGLD SDALKYYEEL DSAKOEYLR QYS-----PDY
bau-114 YATLSAGNIK VGGKSTVVEQ LGHISDASTA NRVAVETLPLN QTILDKQKTV ADATSTIAAA TRTYSONQOQ QAEKAKNAEK QNVNLQGLD SDALKYYEEL DSAKOEYLR QYS-----PDY
bau-112 YATLSAGNIK VGGKSTVVEQ LGHISDASTA NRVAVETLPLN QTILDKQKTV ADATSTIAAA TRTYSONQOQ QAEKAKNAEK QNVNLQGLD SDALKYYEEL DSAKOEYLR QYS-----PDY
bau-120 YATLSAGNIK VGGKSTVVEQ LGHISDASTA NRVAVETLPLN QTILDKQKTV ADATSTIAAA TRTYSONQOQ QAEKAKNAEK QNVNLQGLD SDALKYYEEL DSAKOEYLR QYS-----PDY
bau-015 KATMGQTVK -----NITTELIN RDINTTQEI RDOTTGMLNG SFTVDHRLLS ESGRAEIVQO QKDLPENFRQ -----SAENVKAL PESEYNQVQL -----QTLNVL OAKLY-KMPT
bau-016 KATMGQTVK -----NITTELIN RDINTTQEI RDOTTGMLNG SFTVDHRLLS ESGRAEIVQO QKDLPENFRQ -----SAENVKAL PESEYNQVQL -----QTLNVL OAKLY-KMPT
bau-021 KATMGQTVK -----GAPPTAN RDVNSQEI RDOTTGMLNG SFTVDHRLLS ESGRAEIVQO QKDLPENFRQ -----SAENVKAL PESEYNQVQL -----QTLNVL OAKLY-KMPT
bau-019 KATMGQTVK -----NITTELIN RDINTTQEI RDOTTGMLNG SFTVDHRLLS ESGRAEIVQO QKDLPENFRQ -----SAENVKAL PESEYNQVQL -----QTLNVL OAKLY-KMPT
bau-113 YATLSAGNIK VGGKSTVVEQ LGHISDASTA NRVAVETLPLN QTILDKQKTV ADATSTIAAA TRTYSONQOQ QAEKAKNAEK QNVNLQGLD SDALKYYEEL DSAKOEYLR QYS-----PDY
ca l-223 YATLSAGNIK VGGKSTVVEQ LGHISDASTA NRVAVETLPLN QTILDKQKTV ADATSTIAAA TRTYSONQOQ QAEKAKNAEK QNVNLQGLD SDALKYYEEL DSAKOEYLR QYS-----PDY
pit-06 YATLSAGNIK VGGKSTVVEQ LGHISDASTA NRVAVETLPLN QTILDKQKTV ADATSTIAAA TRTYSONQOQ QAEKAKNAEK QNVNLQGLD SDALKYYEEL DSAKOEYLR QYS-----PDY
pit-20 YATLSAGNIK VGGKSTVVEQ LGHISDASTA NRVAVETLPLN QTILDKQKTV ADATSTIAAA TRTYSONQOQ QAEKAKNAEK QNVNLQGLD SDALKYYEEL DSAKOEYLR QYS-----PDY
bau-017 KATMGQTVK -----NITTELIN RDINTTQEI RDOTTGMLNG SFTVDHRLLS ESGRAEIVQO QKDLPENFRQ -----SAENVKAL PESEYNQVQL -----QTLNVL OAKLY-KMPT
nos-018 KATMGQTVK -----NITTELIN RDINTTQEI RDOTTGMLNG SFTVDHRLLS ESGRAEIVQO QKDLPENFRQ -----SAENVKAL PESEYNQVQL -----QTLNVL OAKLY-KMPT
nos-022 KATMGQTVK -----NITTELIN RDINTTQEI RDOTTGMLNG SFTVDHRLLS ESGRAEIVQO QKDLPENFRQ -----SAENVKAL PESEYNQVQL -----QTLNVL OAKLY-KMPT
bau-02 KATMGQTVK -----GAPPTAN RDVNSQEI RDOTTGMLNG SFTVDHRLLS ESGRAEIVQO QKDLPENFRQ -----SAENVKAL PESEYNQVQL -----QTLNVL OAKLY-KMPT
bay-015 KATMGQTVK -----NITTELIN RDINTTQEI RDOTTGMLNG SFTVDHRLLS ESGRAEIVQO QKDLPENFRQ -----SAENVKAL PESEYNQVQL -----QTLNVL OAKLY-KMPT

5160
5280
5400
5520



ca1-D23 EKD----RFK SGNVVPKTWG EAI--KLRVE KQGQFEKGWE IKFPYGSY-Y DPKVTK  
pit-D6 SAV----VGT AA EKIQKVEP KKATQNNKEG NK  
bau-D2 KAR-----L DKKPINKIVV GVNSRAITL NLGQVGSK  
  
6121 6133  
bau-D10 NTSGMPKVIF ERK

Supplementary file 9

a) type-II CdiA repeats. The first ten 20-21 aa repeats found in type-II CdiA are shown. The first four are common to all proteins. From repeat 5 on, class 1 (blu residues) and class 2 and 3 proteins (red residues) repeats diverge. Regularly repeated residues are highlighted.

Table of amino acid sequences for repeats 01-10 across various protein classes (bau-09 to bau-15, nos-02 to nos-04, cal-02, pit-06, pit-08, pit-09, pit-10, pit-11, pit-12, pit-13, pit-14, pit-15, nos-02 to nos-04, cal-02, pit-06, pit-08, pit-09, pit-10, pit-11, pit-12, pit-13, pit-14, pit-15). Residues are color-coded by class (blue, red, black) and some are bolded.

Supplementary file 9

b) PT-VENN and PT-LPEN modules in type-I and type-II proteins. The size of the pretoxin PT-VENN module is defined (see PF04829). The upstream boundary of the PT-LPEN module is unknown. For sake of simplicity, the two pre-toxin modules have the same size in the alignment shown

Table of amino acid sequences for PT-VENN and PT-LPEN domains across various protein classes (bau-A1 to bau-C8, nos-4 to nos-9, bau-D10 to bau-D12, bau-D13 to bau-D15, nos-D22 to nos-D24, bau-D17 to bau-D19, bau-D2). Residues are color-coded by class (blue, red, black).

Supplementary file 9

c) potential N-domains in the CT region of type-I CdiA. Conserved residues are highlighted.

Table of amino acid sequences for potential N-domains in the CT region of type-I CdiA (bau-B1 to pit-A5). Conserved residues are highlighted in yellow.

Supplementary file 9

d) upstream N-domains in the CT region of type-II CdiA (class-1 and class-2 proteins) proteins with similar domains are marked

Table of amino acid sequences for upstream N-domains in the CT region of type-II CdiA (nos-D2 to nos-D4, bau-D14 to bau-D16, bau-D17 to bau-D19, bau-D20 to bau-D22, cal-D23). Residues are color-coded by class (blue, red, black).

Supplementary file 9

e) upstream N-domains in the CT region of type-II CdiA (class-3 CdiA). Similar regions are highlighted. SWRs (switch regions) located immediately upstream of the C-domain of the CT region are shown. Only

nos-D22 NRDINTTQEITRDQTTGMLNGSFTVDHRLLESSEGRAEIVQOQKDLPEN FRQSAENLAKALPDGAYKDKALQTLNNVQA KLYNLSEYKEAGVWVNSVASELLKRMESKDVLEALFSKLDFFYAAKEFSEIQNQLTDLKSGFNLETFRQP
nos-D17 NRDINTTQEITRDQTTGMLNGSFTVDHRLLESSEGRAEIVQOQKDLPEN FRQSAENLAKALPDGAYKDKALQTLNNVQA KLYNLSEYKEAGVWVNSVASELLKRMESKDVLEALFSKLDFFYAAKEFSEIQNQLTDLKSGFNLETFRQP
bay-D15 NRDINTTQEITRDQTTGMLNGSFTVDHRLLESSEGRAEIVQOQKDLPEN FRQSAENLAKALPDGAYKDKALQTLNNVQA KLYNLSEYKEAGVWVNSVASELLKRMESKDVLEALFSKLDFFYAAKEFSEIQNQLTDLKSGFNLETFRQP
bau-211 NRDINTTQEITRDQTTGMLNGSFTVDHRLLESSEGRAEIVQOQKDLPEN FRQSAENLAKALPDGAYKDKALQTLNNVQA KLYNLSEYKEAGVWVNSVASELLKRMESKDVLEALFSKLDFFYAAKEFSEIQNQLTDLKSGFNLETFRQP
...
nos-D15 NRDINTTQEITRDQTTGMLNGSFTVDHRLLESSEGRAEIVQOQKDLPEN FRQSAENLVQALPDNAYKQKALSLNNVQA GLANNPEHLAKGGDEVYEGYKEFIRQGGPEQYEAALLNKEVLPKALELNNTAKQTLDEIQKQIAEYQVSDDT
nos-D18 NRDINTTQEITRDQTTGMLNGSFTVDHRLLESSEGRAEIVQOQKDLPEN FRQSAENLVQALPDNAYKQKALSLNNVQA GLANNPEHLAKGGDEVYEGYKEFIRQGGPEQYEAALLNKEVLPKALELNNTAKQTLDEIQKQIAEYQVSDDT
...
nos-D19 NRDINTTQEITRDQTTGMLNGSFTVDHRLLESSEGRAEIVQOQKDLPRN AEIVGKMTAAGVTSLVGATAAALATKQDNLK QAYDTVMNPARTFDFVQKHPEAATVLEQFKNGYDGLLQTKGSIQLLAQALGQDQVWLTTSMTSFLGKIGAYD
nos-D2 NRDINTTQEITRDQTTGMLNGSFTVDHRLLESSEGRAEIVQOQKDLPRN AEIVGKMTAAGVTSLVGATAAALATKQDNLK QAYDTVMNPARTFDFVQKHPEAATVLEQFKNGYDGLLQTKGSIQLLAQALGQDQVWLTTSMTSFLGKIGAYD

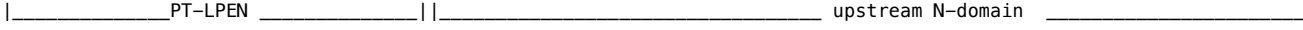

nos-D22 KSGVNEEKTIYAQGTDFETKVS-SITTLGHTIISNVADLNSIKDISESTGVDIEKVLAVGLLISGPPVRLVIESGKMAVSLVDEIVQA
nos-D17 KAGGNEQETIYAQGTDFETKVS-SITTLGHTIISNVADLNSIKDISESTGVDIEKVLAVGLLISEPPVRLVIESGKMAVSLVDEIVQA
bay-D15 KAGVNEQETIYAQGTDFETKVS-SITTLGHTIISNVADLNSIKDISESTGVDIEKVLAVGLLISGPPVRLVIESGKMAVSLVDEIVQA
bau-211 KSGVNEQETIYAQGTDFETKVS-SITTLGHTIISNVADLNSIKDISESTGVDIEKVLAVGLLISGPPVRLVIESGKMAVSLVDEIVQA
...
nos-D15 TDNRQSPTEDEITFKDYKVEIQNSITLQKLEINFIKQNEEIKDQENLITLQADNVLQDQNVKQSAQLGHLALAPKPKK
nos-D18 TDNRQSPTEDEITFKDYKVEIQNSITLQKLEINFIKQNEEIKDQENLITLQADNVLQDQNVKQSAQLGHLALAPKPKK
bau-Leaf ADKNQSSVTSDEITFKDYKVEIQNSITLQKLEINFIKQNEEIKDQENLITLQADNVLQDQNVKQSAQLGHLALAPKPKK
...
nos-D16 ARSIVREVLTAVSQDQGANNTTDEGTGLNPNQPYKGFELPTIVTAKGDAVLIQGSQSDSEASIAGENVVKVDGNSLAIKLFQDQSAVSYKVNDAIEKTDIPATAGLALSLAFGGPIGLARDLITDVLGPELAQ
nos-D21 ARSIVREVLTAVSQDQGANNTTDEGTGLNPNQPYKGFELPTIVTAKGDAVLIQGSQSDSEASIAGENVVKVDGNSLAIKLFQDQSAVSYKVNDAIEKTDIPATAGLALSLAFGGPIGLARDLITDVLGPELAQ
...
nos-D19 HQTNTVLDVNNENRSSLITTTGHEIAHGQGISNETSADLVGKSDVWAFSGVKMNEATIDQYKQDGGKDASTQANVAVLEKONTKALDAISDHADQIDEKTSYWDIKH-DGCHSKECTVAYQKMDAAQEKAFRLGQAKATKFMNDIKNL
nos-D2 HQTNTVLDVNNENRSSLITTTGHEIAHGQGISNETSADLVGKSDVWAFSGVKMNEATIDQYKQDGGKDASTQANVAVLEKONTKALDAISDHADQIDEKTSYWDIKH-LGCWNCDECAVYKQMDAAQEKAYRLGQAKATKFMNDIKNL

A.seifertii // \*asnaqlagvigQNAVENN KTSIKQDIKHALTCWGLECHQYKHLDVVQEAAYQKGGDRAVAKFVSDLKNL
A.junii // aagivavgtvgdsafeaqisgvaqNAVENN KTSVQDIKHALTCWGAECRQYKDLKVAQKAAQYKGGQDAITKFMVNDLNL

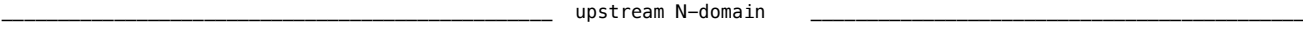

nos-D22 GVDILNSMTAAAHDTSVNTINNWTNPKIASELENSTGENKEASLKFANEVQD KQGAEYLINAAAGIVVGGIGGTAKTKIDGKDVSTAGIG SNSKDPVKELEVGSYQELKSR //
nos-D17 GVDILNSMTAAAHDTSVNTINNWTNPKIASELETSTGENKEASLKFANEVQD KQGAEYLINAAAGIVVGGIGGTAKTKSDGKEAGVNSGVG GATWDTSPKVTLDKVDNYIN //
bay-D15 GVDILNSMTAAAHDTSVNTINNWTNPKIASELENSTGENKASLKFANEVQD KQGAEYLINAAAGIVVGGIGGTAKTKIDGKDVSTAGIG NINPITGHKILGTHKDESNTV...
bau-D211 GVDILNSMTAAAHDTSVNTINNWTNPKIASELENSTGENKASLKFANEVQD KQGAEYLINAAAGIVVGGIGGTAKTKIDGKDVSTAGIG IGWVDQYGVQKVTGDTVARD...
...
nos-D18 GVDILNSMTAAAHDTSVNTINNWTNPKIASELENSTGENKASLKFANEVQD KQGAEYLINAAAGIVVGGIGGTAKTKIDGKDVSTAGIG ISALNRIKENDKGTDLNSKSSD //
nos-D15 GVDILNSMTAAAHDTSVNTINNWTNPKIASELENSTGENKASLKFANEVQD KQGAEYLINAAAGIVVGGIGGTAKTKIDGKDVSTAGIG NINPITGHKILGTHKDESNTV...
bau-Leaf GVDILNSMTAAAHDTSVNTINNWTNPKIASELENSTGENKASLKFANEVQD KQGAEYLINAAAGIVVGGIGGTAKTKIDGKDVSTAGIG SRGELTKPYDPVQTRNDLEAVH...
...
nos-D16 GSDVLLKNEVTAVVRDTSYDVTSGYTSNSTKQQLSGLTDPASQALQVSEQLQRT KDGVGFLASVVLGA--GGIAKTA--KIDGNEVEVSTAGIG SRGELTKPYDPVQTRNDLEAVH...
nos-D21 GSDVLLKNEVTAVVRDTSYDVTSGYTSNSTKQQLSGLTDPASQALQVSEQLKRT KDGVGFLASVVLGA--GGIAKTA--KIDGNEVEVSTAGIG IGWVDQYGVQKVTGDTVARD...
...
nos-D19 VPNPKEVYDALNDPMTGAMAIWGVKNIIPGELWDTGKTIITNVLVNGSPAEFEKLGNAEMTTVLN---AVSAGTITVAKKGGKI VVEAAKVKLAKADFPDPLNVO----- INGFSLPPKTKLVINIKADQA...
nos-D2 VPNPKEVYDALNDPMTGAMAIWGVKNIIPGELWDTGKTIITNVLVNGSPAEFEKLGNAEMTTVLN---AVSAGTITVAKKGGKI VIEAAKSAKRILQNDPAKLP----- ITTSAGGYIKASLITENGLIID...
...
A.seifertii VPNPKEVYAIKNDPAGTAKAIYEGKQVPRDIDTGTKIANTVNTGDTPAEFEKLGADMALALNTLSGLVAGTIVTAKKGGKI VIDASKTIKAKADFPDPLNVO----- INGFSLPPKTKLVINIKADQA...
A.junii VPNPKEVYDALNDPMTGAMAIWGVKNIIPGELWDTGKTIITNVLVNGSPAEFEKLGADMALALNTLSGLVAGTIVTAKKGGKI VIEAAKVKLAKADFPDPLNVO----- VNGTSGNRVSDSNTSLIDEK...
...
|----- SWR -----|----- C-domain -----|





**Supplementary file 11.** CdiA proteins in non ACB-complex Acinetobacter species  
 Identical proteins are highlighted

| species                | strain         | GenBank ID     | type | size (aa) | notes                                                      | modules     | recognized CT domains    |
|------------------------|----------------|----------------|------|-----------|------------------------------------------------------------|-------------|--------------------------|
| <i>A. gernerii</i>     | MTCC 9824      | ASY01000035.1  | II   | 2010      | truncated                                                  | PT-LPEN     | bacteriocin (pfam12639)  |
|                        | DSM 14967      | APPN01000054.1 | II   | >4000     | truncated                                                  |             |                          |
|                        | KCTC 12415     | BBLI01000056.1 | II   | 2228      | truncated                                                  |             |                          |
| <i>A. guillouiae</i>   | CIP 63.46      | APOS01000036.1 | I    | 2113      |                                                            | DUF 637     |                          |
|                        | KCTC 23200     | BBRY01000027.1 |      |           |                                                            |             |                          |
|                        | MSP4-18        | ASQG01000044.1 |      |           |                                                            |             |                          |
| <i>A. junii</i>        | NIPH 991       | APPJ01000002.1 | II   | 1196      | truncated                                                  | PT-VENN/SWR | endoU (pfam14436)        |
|                        | CIP 107470     | APPS01000060.1 | II   | 4136      | <i>cdiC</i> gene between <i>cdiB</i> and <i>cdiA</i> genes |             |                          |
|                        | KCTC 12416     | BBSD01000040.1 |      |           |                                                            |             |                          |
| <i>A. haemolyticus</i> | MTCC 11364     | ASYZ01000005.1 |      |           |                                                            |             |                          |
|                        | TJS01          | NZ_CP018871.1  | I    | 2246      |                                                            | DUF-637     | HINT (c125980)           |
| <i>A. bereziniae</i>   | UBA4199        | DFTZ01000108.1 | I    | 2199      |                                                            | DUF-637     |                          |
|                        | XH901          | NZ_CP018259.1  | II   | 4155      |                                                            |             | ribonuclease (pfam00545) |
|                        | KCTC23199      | BBLJ01000001.1 |      |           |                                                            |             |                          |
| LMG1003                | APQG01000036.1 |                |      |           |                                                            |             |                          |
| <i>A. soli</i>         | NIPH 3         | APPK01000024.1 | II   | 4662      |                                                            |             |                          |
|                        | GFJ2           | NZ_CP016896.1  | II   | 3552      |                                                            | PT-VENN     | endoU (c116881)          |
|                        | NIPH2899       | APPV01000010.1 | II   | 4024      |                                                            |             |                          |
